# Supplementary material for: Selenonium Salt as a Catalyst for Nucleophilic Substitution Reactions in Water: Synthesis of Thiocyanites and Selenocyanates
Source: MDPI journal article supplement (doi:10.3390/molecules28073056), 2023-03-29

Supporting Information for:

**Selenonium Salt as a Catalyst for Nucleophilic Substitution  
Reactions in Water: Synthesis of Thiocyanites and Selenocyanates**

TABLE OF CONTENTS

|                                                                                                                        |    |
|------------------------------------------------------------------------------------------------------------------------|----|
| <sup>1</sup> H NMR of catalyst <b>C7</b> and varying amounts of BnBr .....                                             | 02 |
| Optimization conditions for the synthesis of thiocyanates without a catalyst .....                                     | 03 |
| Substrate scope for the preparation of thio- and selenocyanates in uncatalyzed<br>using hydrated EtOH as solvent ..... | 04 |
| Copies of <sup>1</sup> H and <sup>13</sup> C NMR of catalysts and products .....                                       | 05 |

$^1\text{H}$  NMR of catalyst **C7** and varying amounts of benzyl bromide.

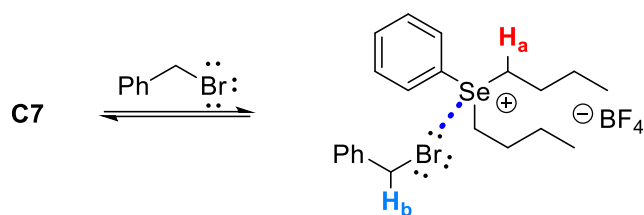

The signal shift of hydrogen  $\text{H}_a$ :

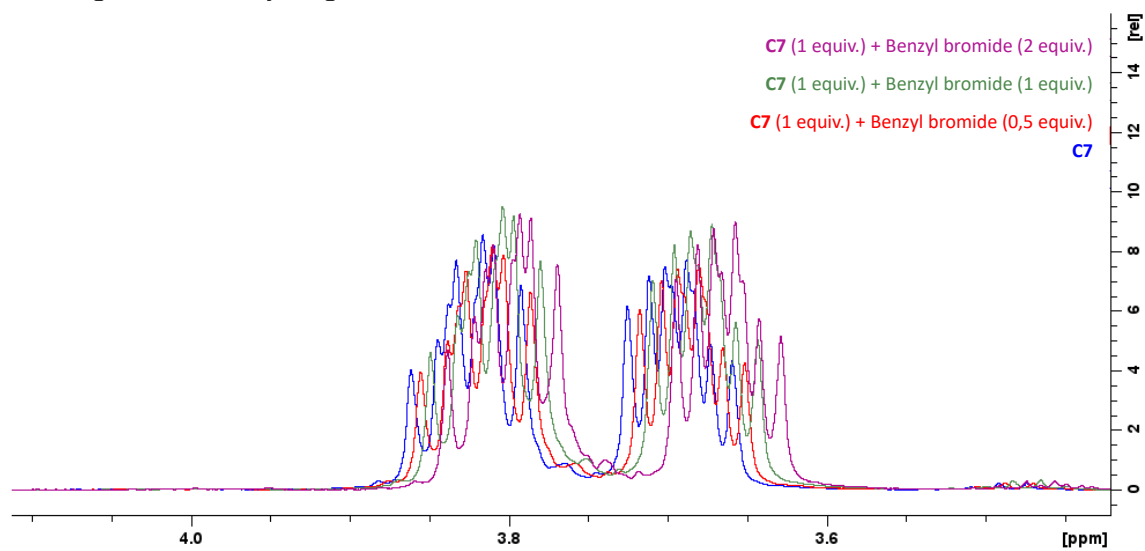

The signal shift of hydrogen  $\text{H}_b$ :

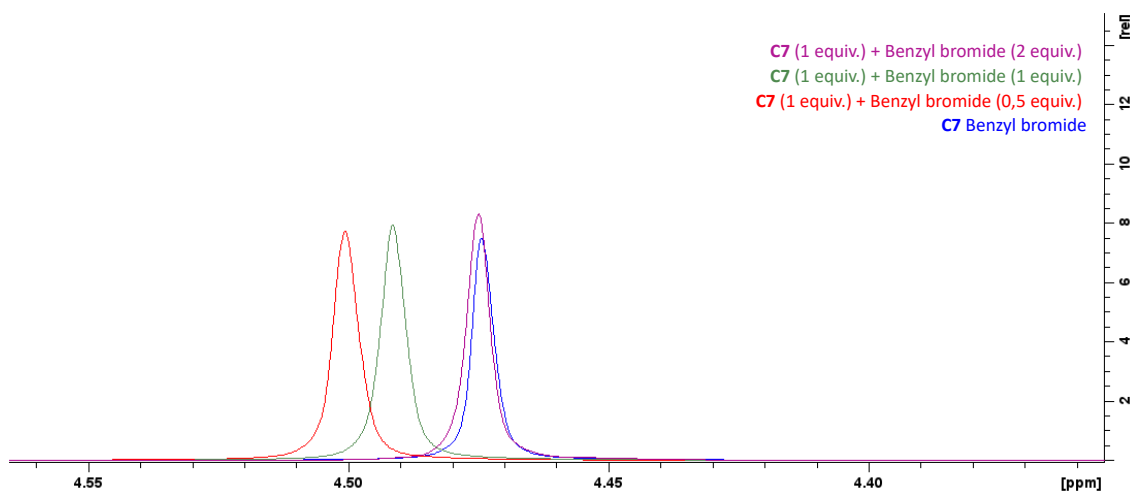

**Optimization of the reaction conditions for the synthesis of thiocyanates without a catalyst:**

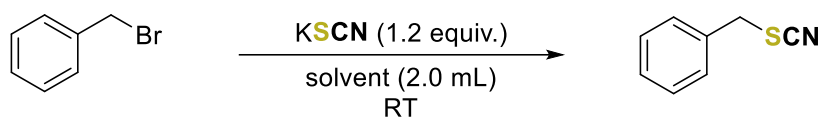

| Entry | Solvent             | Time   | Isolated Yield (%) |
|-------|---------------------|--------|--------------------|
| 1     | Dimethyl carbonate  | 10 min | 8                  |
| 2     | Anisole             | 10 min | 3                  |
| 3     | Ethylene glycol     | 10 min | 2                  |
| 4     | 1-Butanol           | 10 min | 6                  |
| 5     | Ethyl acetate       | 10 min | 1                  |
| 6     | EtOH <sup>[a]</sup> | 10 min | 26                 |
| 7     | EtOH <sup>[a]</sup> | 4 h    | 83                 |
| 8     | EtOH <sup>[a]</sup> | 2 h    | 74                 |

<sup>[a]</sup> 95% EtOH grade (used as received).

Experimental procedure: a test tube was charged with the corresponding solvent (2.0 mL) and benzyl bromide (85.5 mg, 0.5 mmol). The mixture was stirred until became homogeneous and then KSCN (58.3 mg, 0.6 mmol) was added. The reaction mixture was stirred at  $25 \pm 2$  °C (water bath) at a constant rate of 360 rpm during the period indicated on the table above. Afterwards, the mixture was extracted with AcOEt (3 x 10.0 mL) and the combined organic phases washed with water (3 x 10.0 mL), brine (3 x 10.0 mL), dried over  $\text{MgSO}_4$  and evaporated under reduced pressure. Purification was performed by silica gel chromatography column with a mixture of hexanes/AcOEt = 9/1.

Substrate scope for the preparation of thio- and selenocyanates in uncatalyzed using hydrated EtOH as solvent.

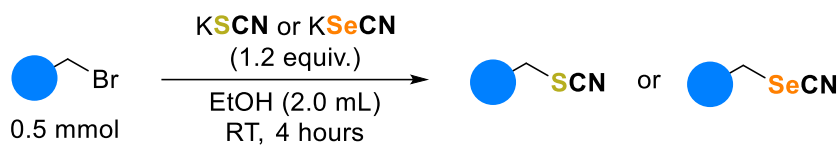

| Entry | Product | Yield (%) <sup>[a]</sup> | Product | Yield (%) <sup>[a]</sup> |
|-------|---------|--------------------------|---------|--------------------------|
| 1     | <br>1a  | 83                       | <br>1b  | 75                       |
| 2     | <br>2a  | 79                       |         |                          |
| 3     | <br>3a  | 65                       |         |                          |
| 4     | <br>4a  | 35                       |         |                          |
| 5     | <br>6a  | 81                       | <br>6b  | 86                       |
| 6     | <br>7a  | 49                       |         |                          |
| 7     | <br>8a  | 81                       |         |                          |
| 8     | <br>9a  | 47                       | <br>9b  | 47                       |
| 9     | <br>10a | 78                       | <br>10b | 69                       |
| 10    | <br>13a | 82                       | <br>13b | 78                       |

<sup>[a]</sup> Yields for pure and isolated products.

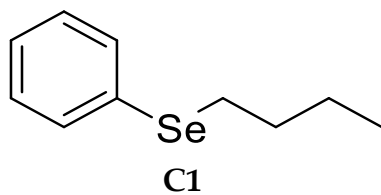

$^1\text{H}$  NMR ( $\text{CDCl}_3$ , 400 MHz)

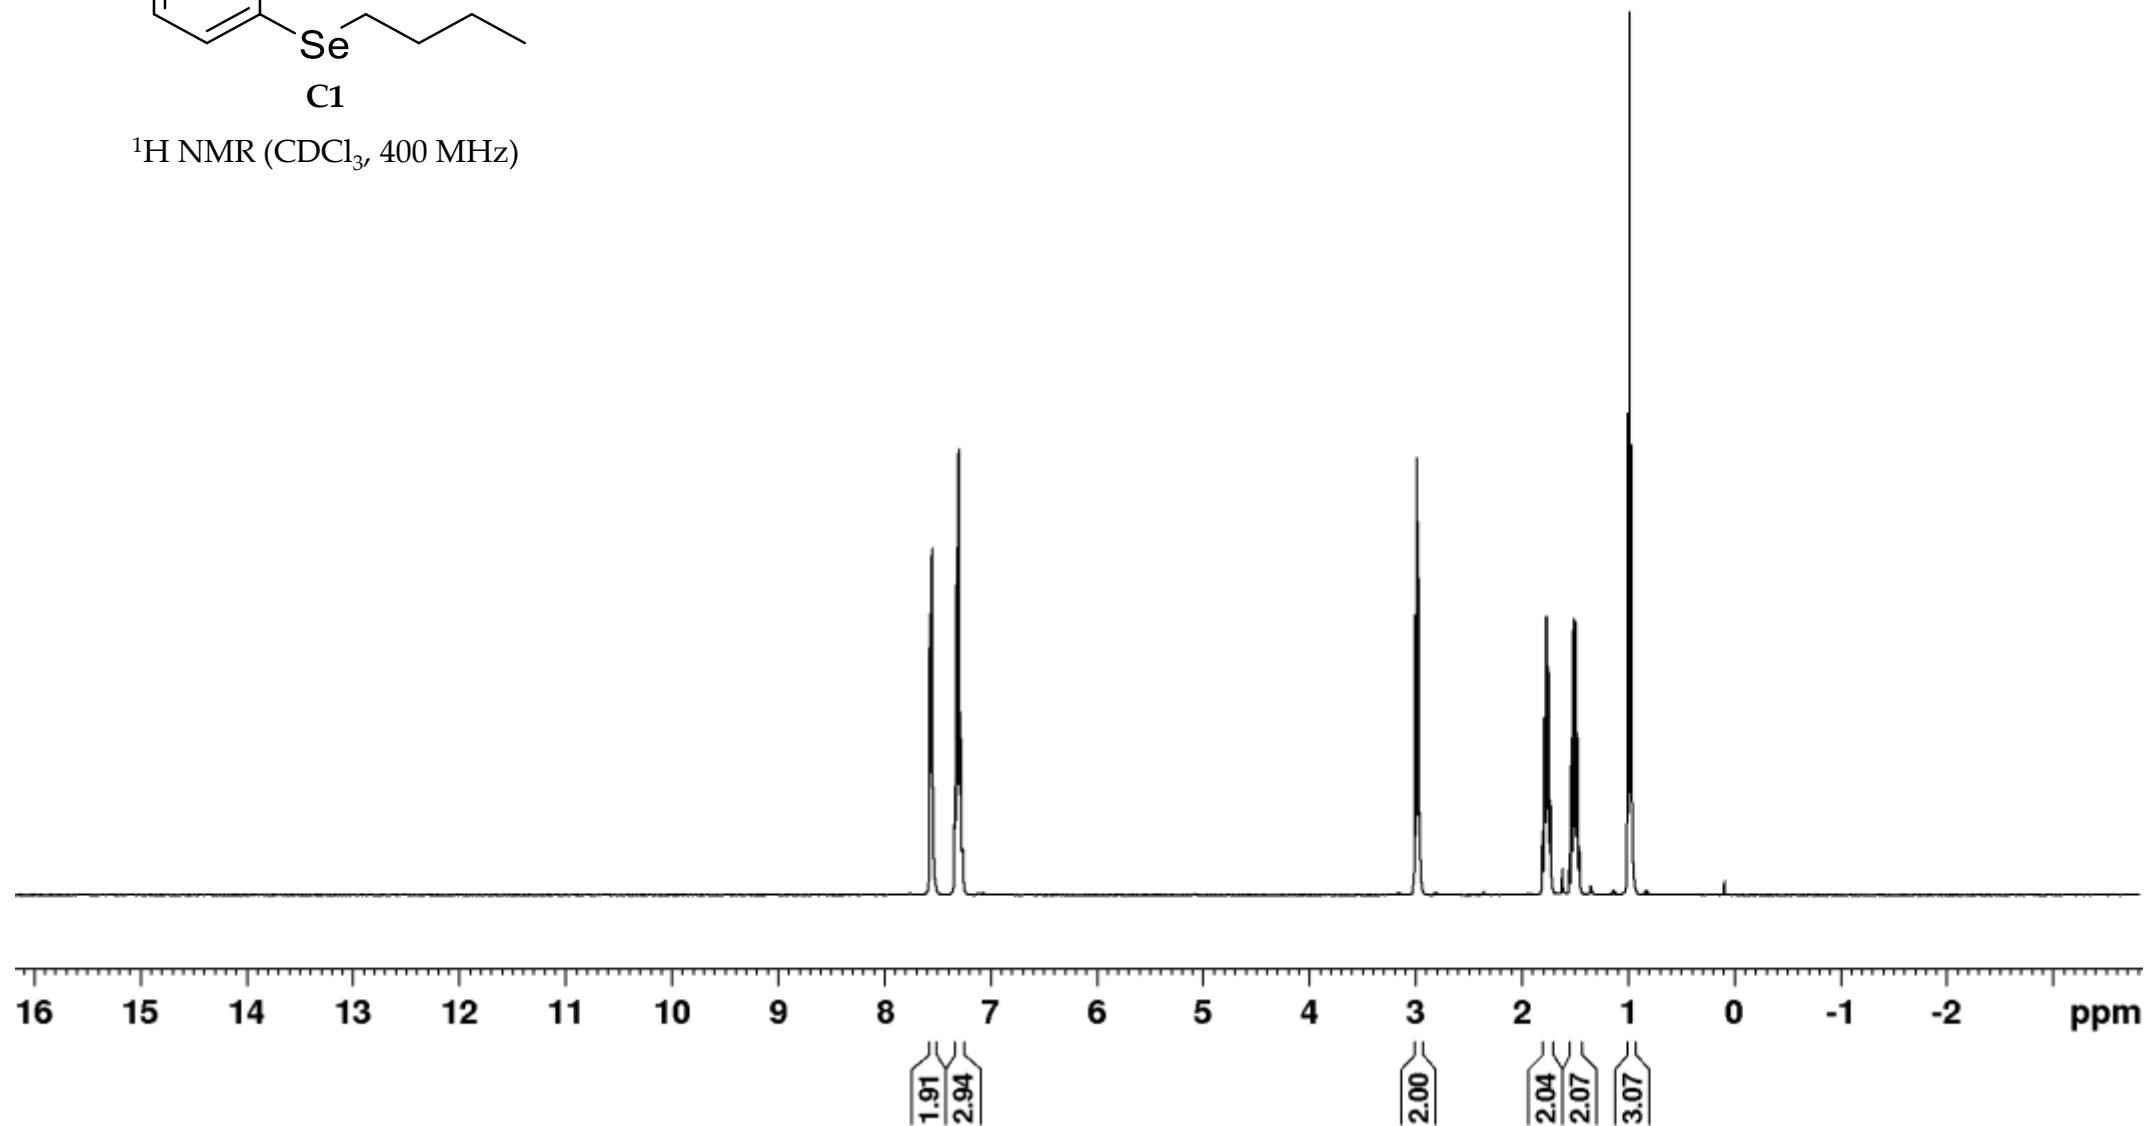

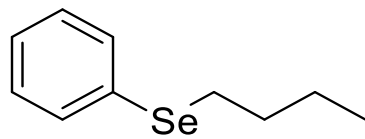

C1

$^{13}\text{C}$  NMR ( $\text{CDCl}_3$ , 100 MHz)

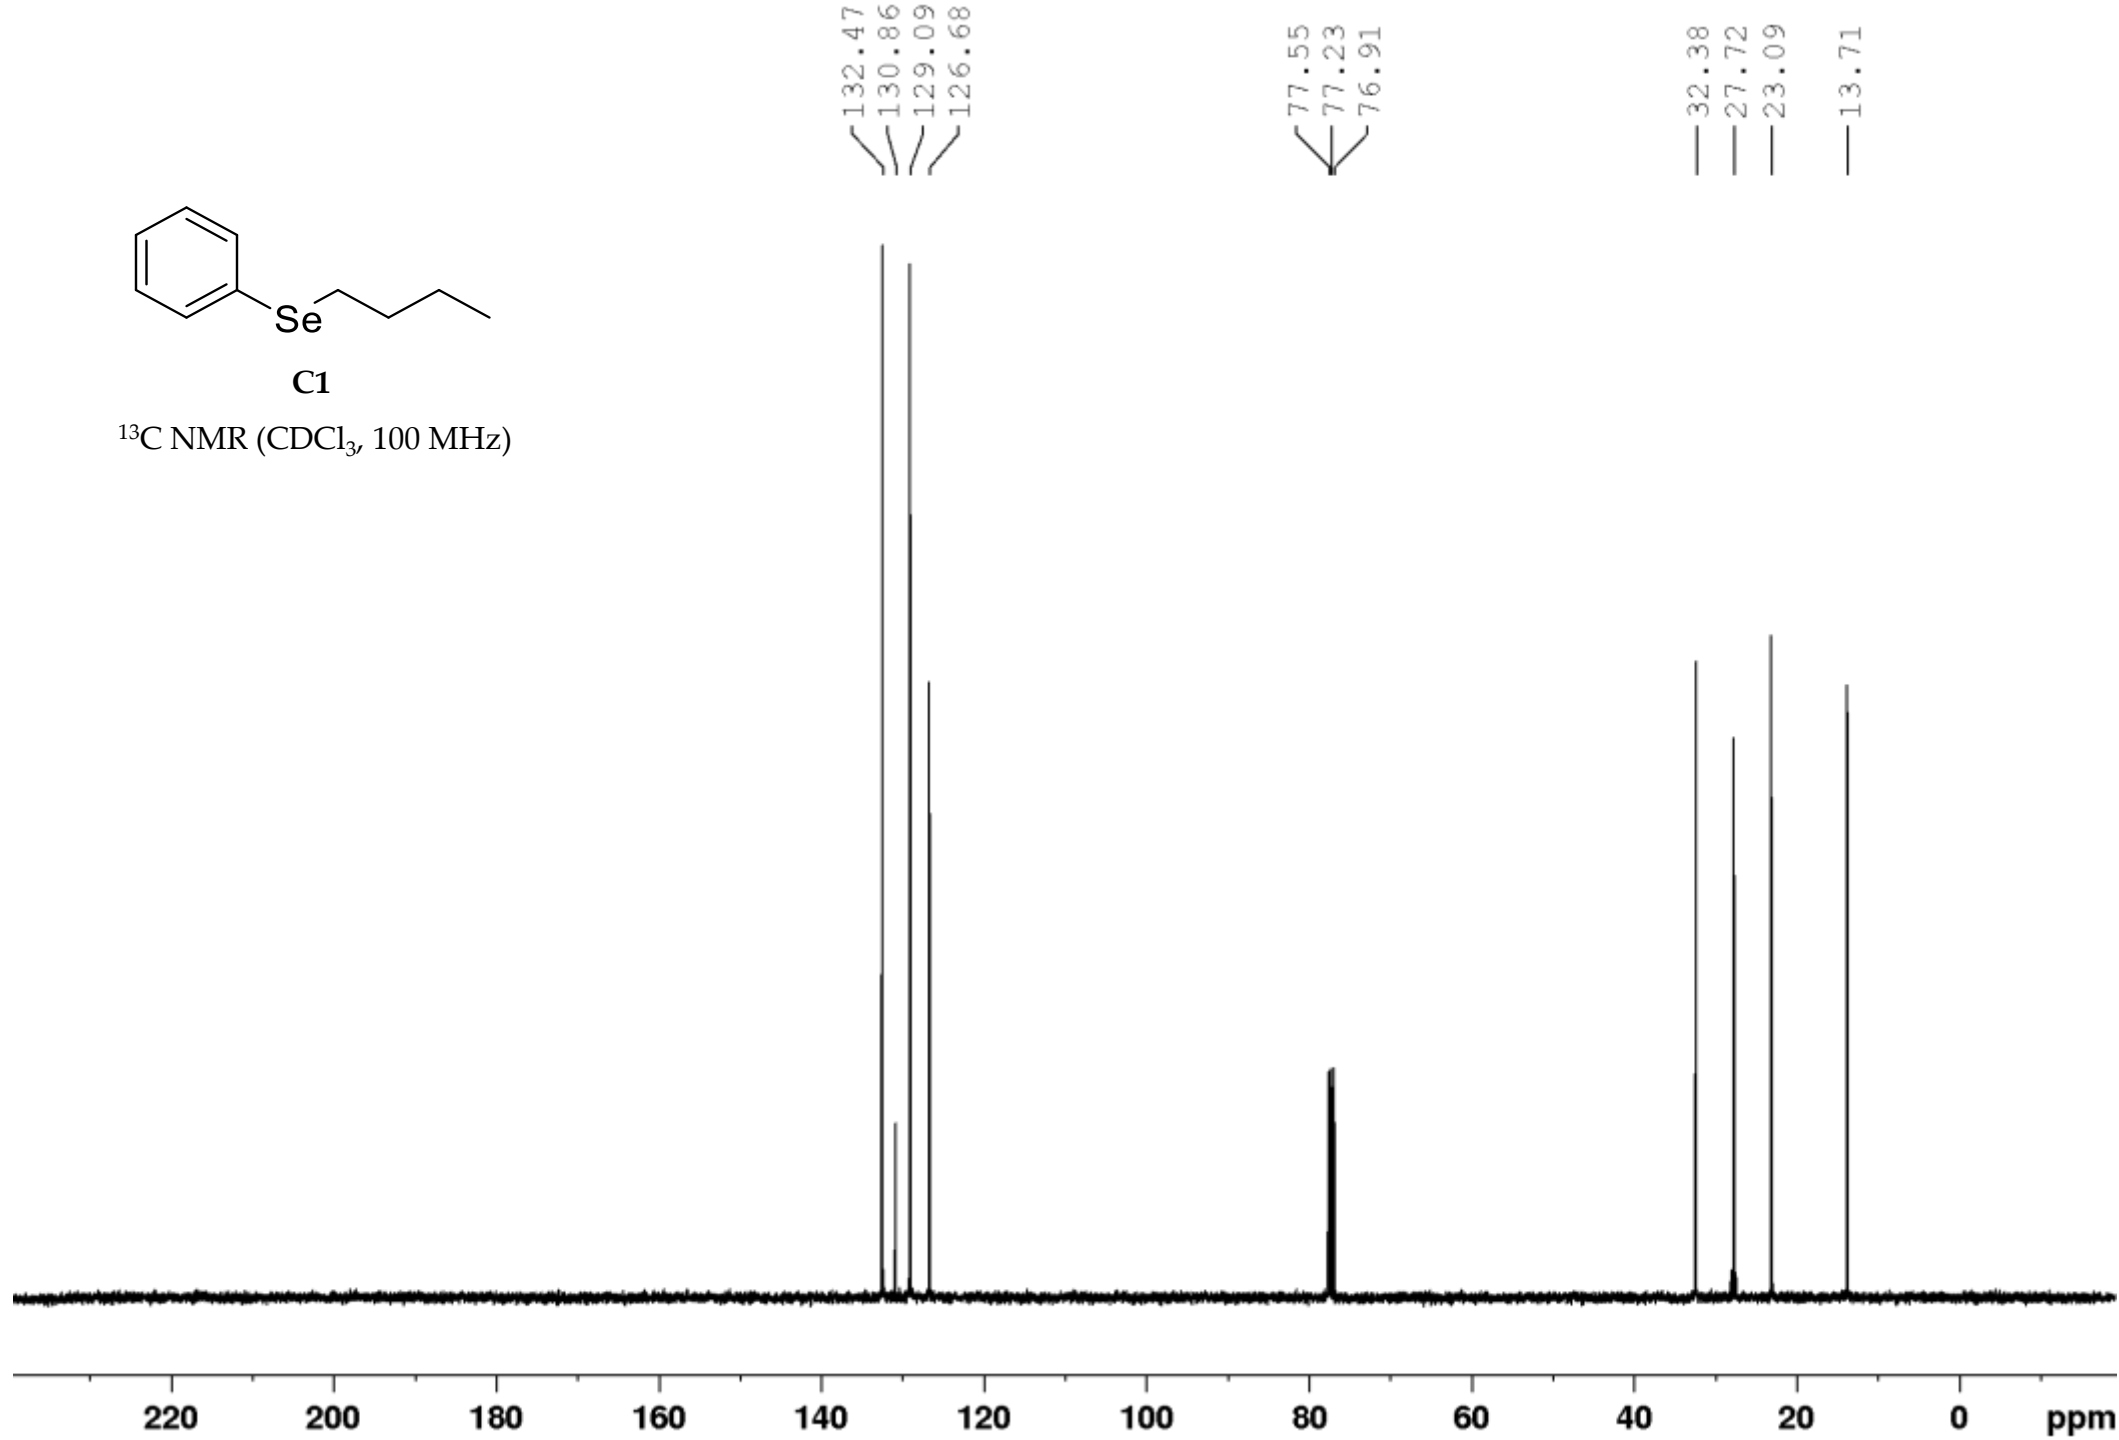

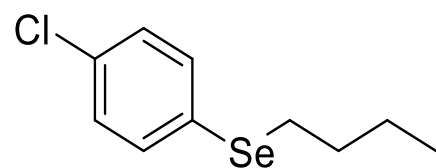

C2

$^1\text{H}$  NMR ( $\text{CDCl}_3$ , 400 MHz)

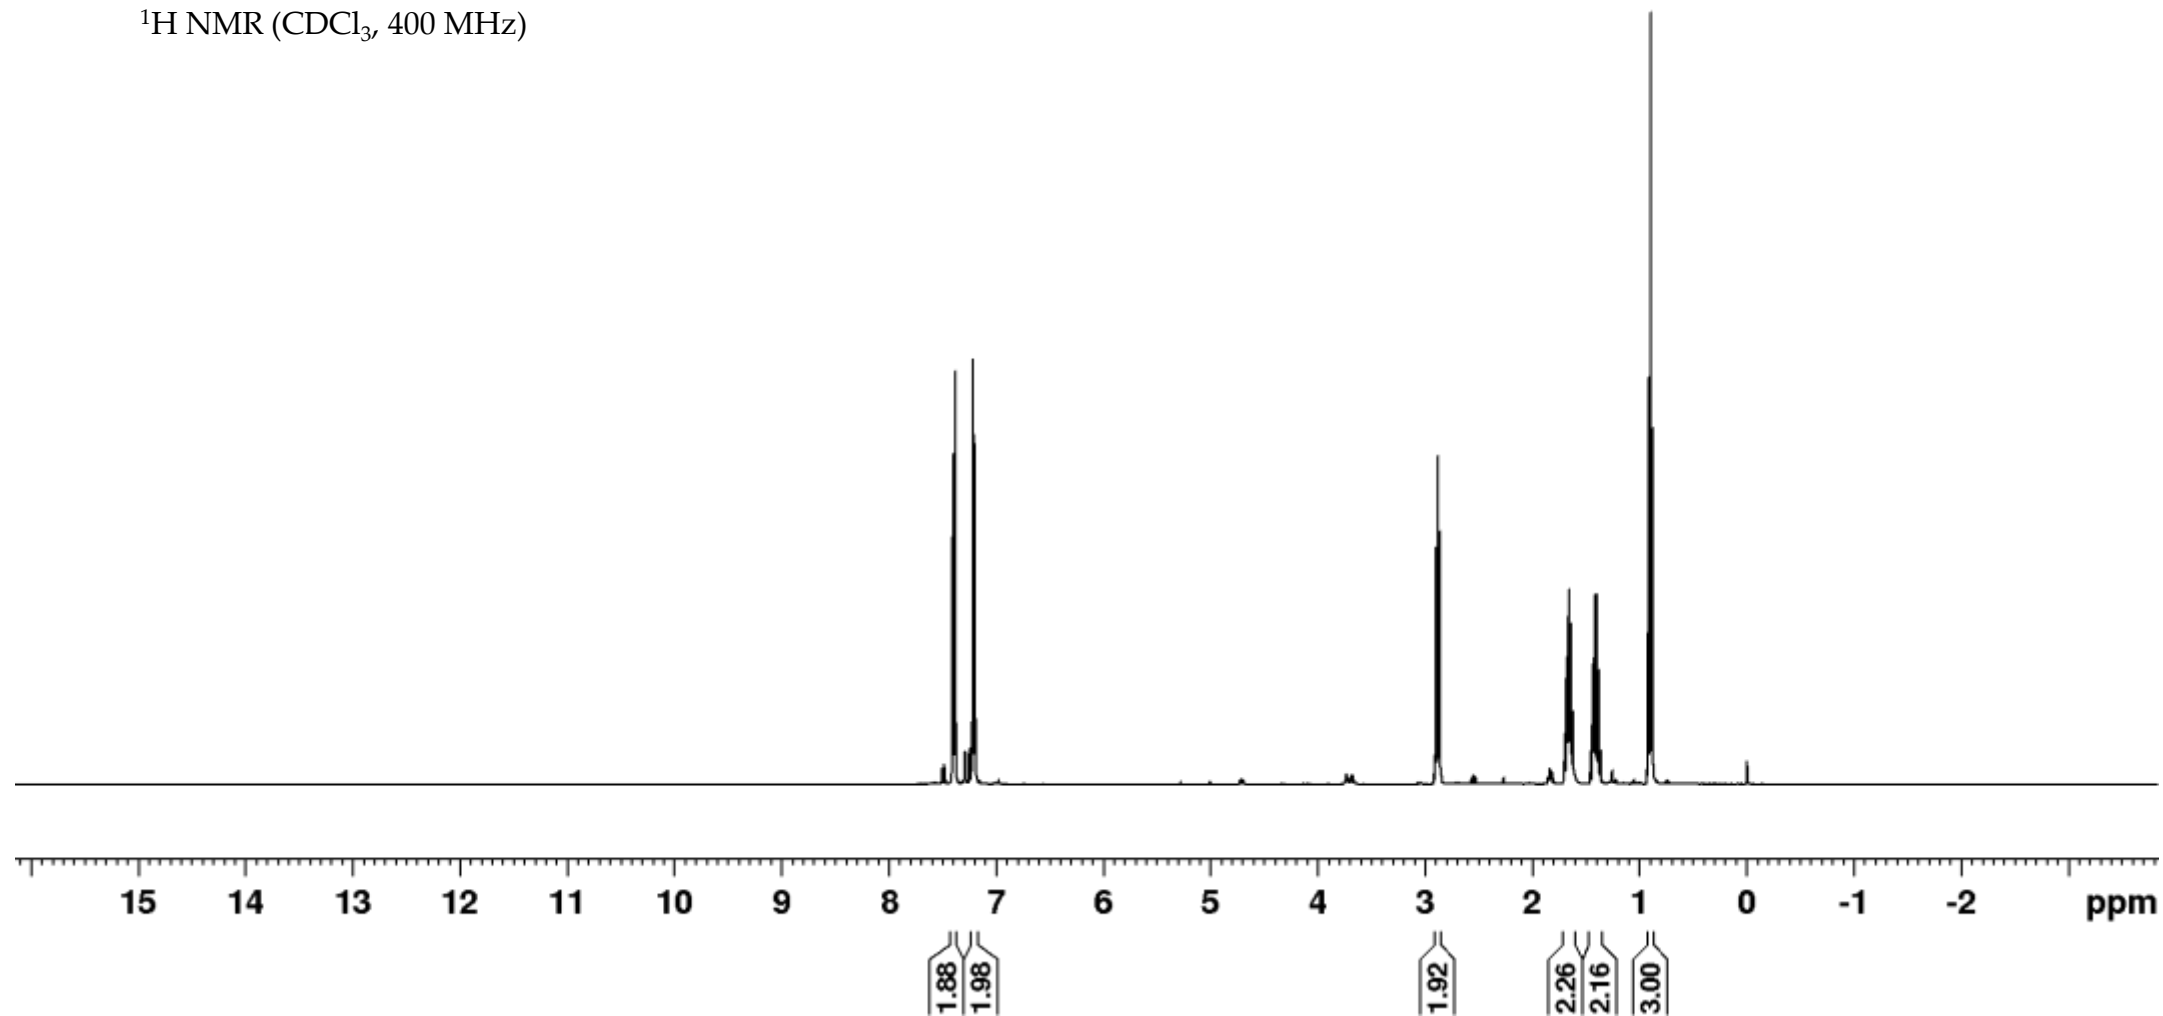



C2

$^{13}\text{C}$  NMR ( $\text{CDCl}_3$ , 100 MHz)

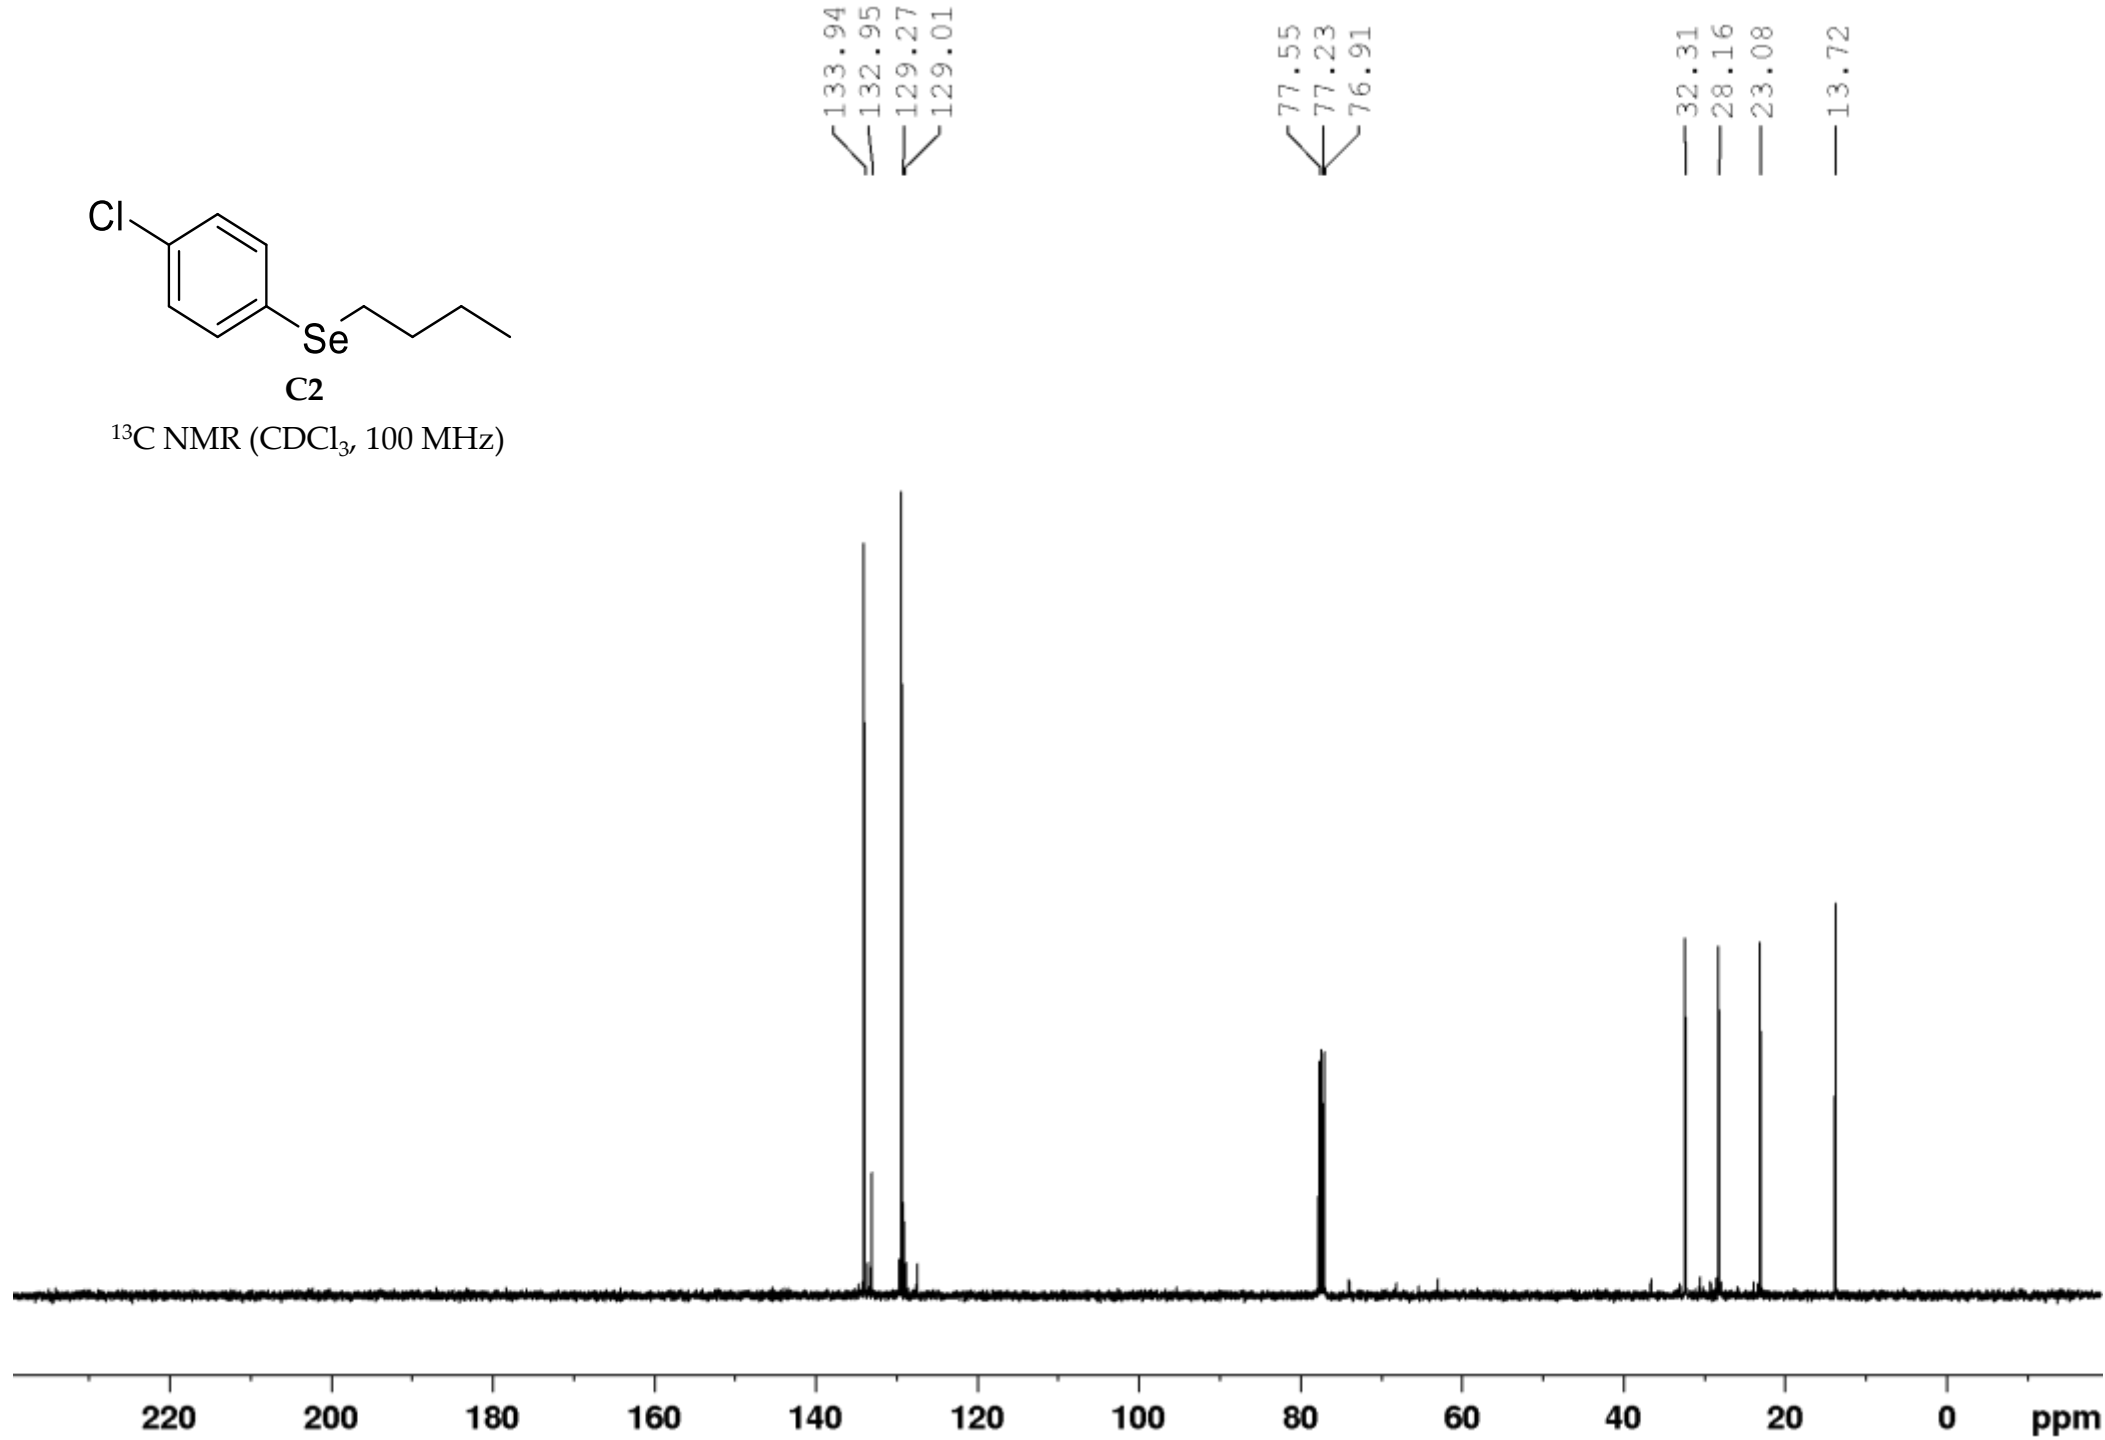



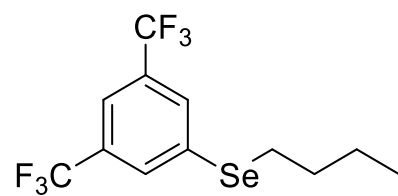

**C3**

$^1\text{H}$  NMR ( $\text{CDCl}_3$ , 400 MHz)

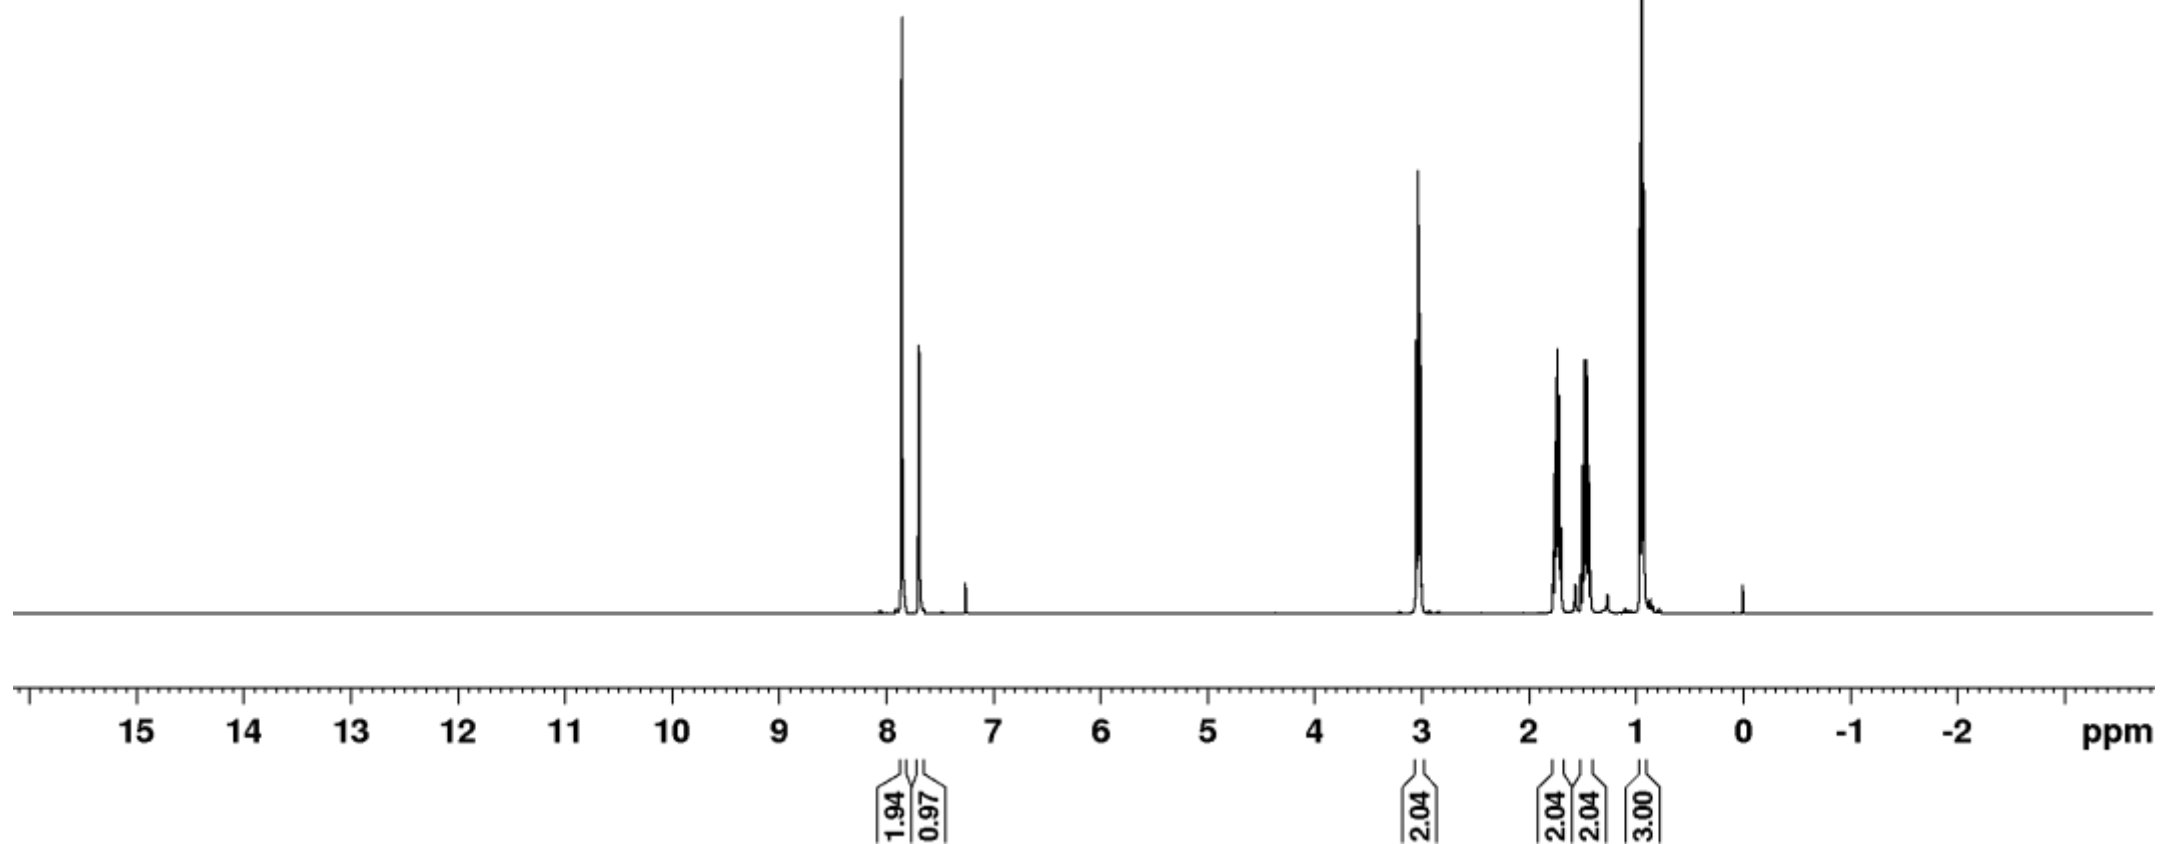

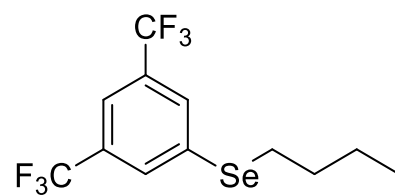

**C3**

$^{13}\text{C}$  NMR ( $\text{CDCl}_3$ , 100 MHz)

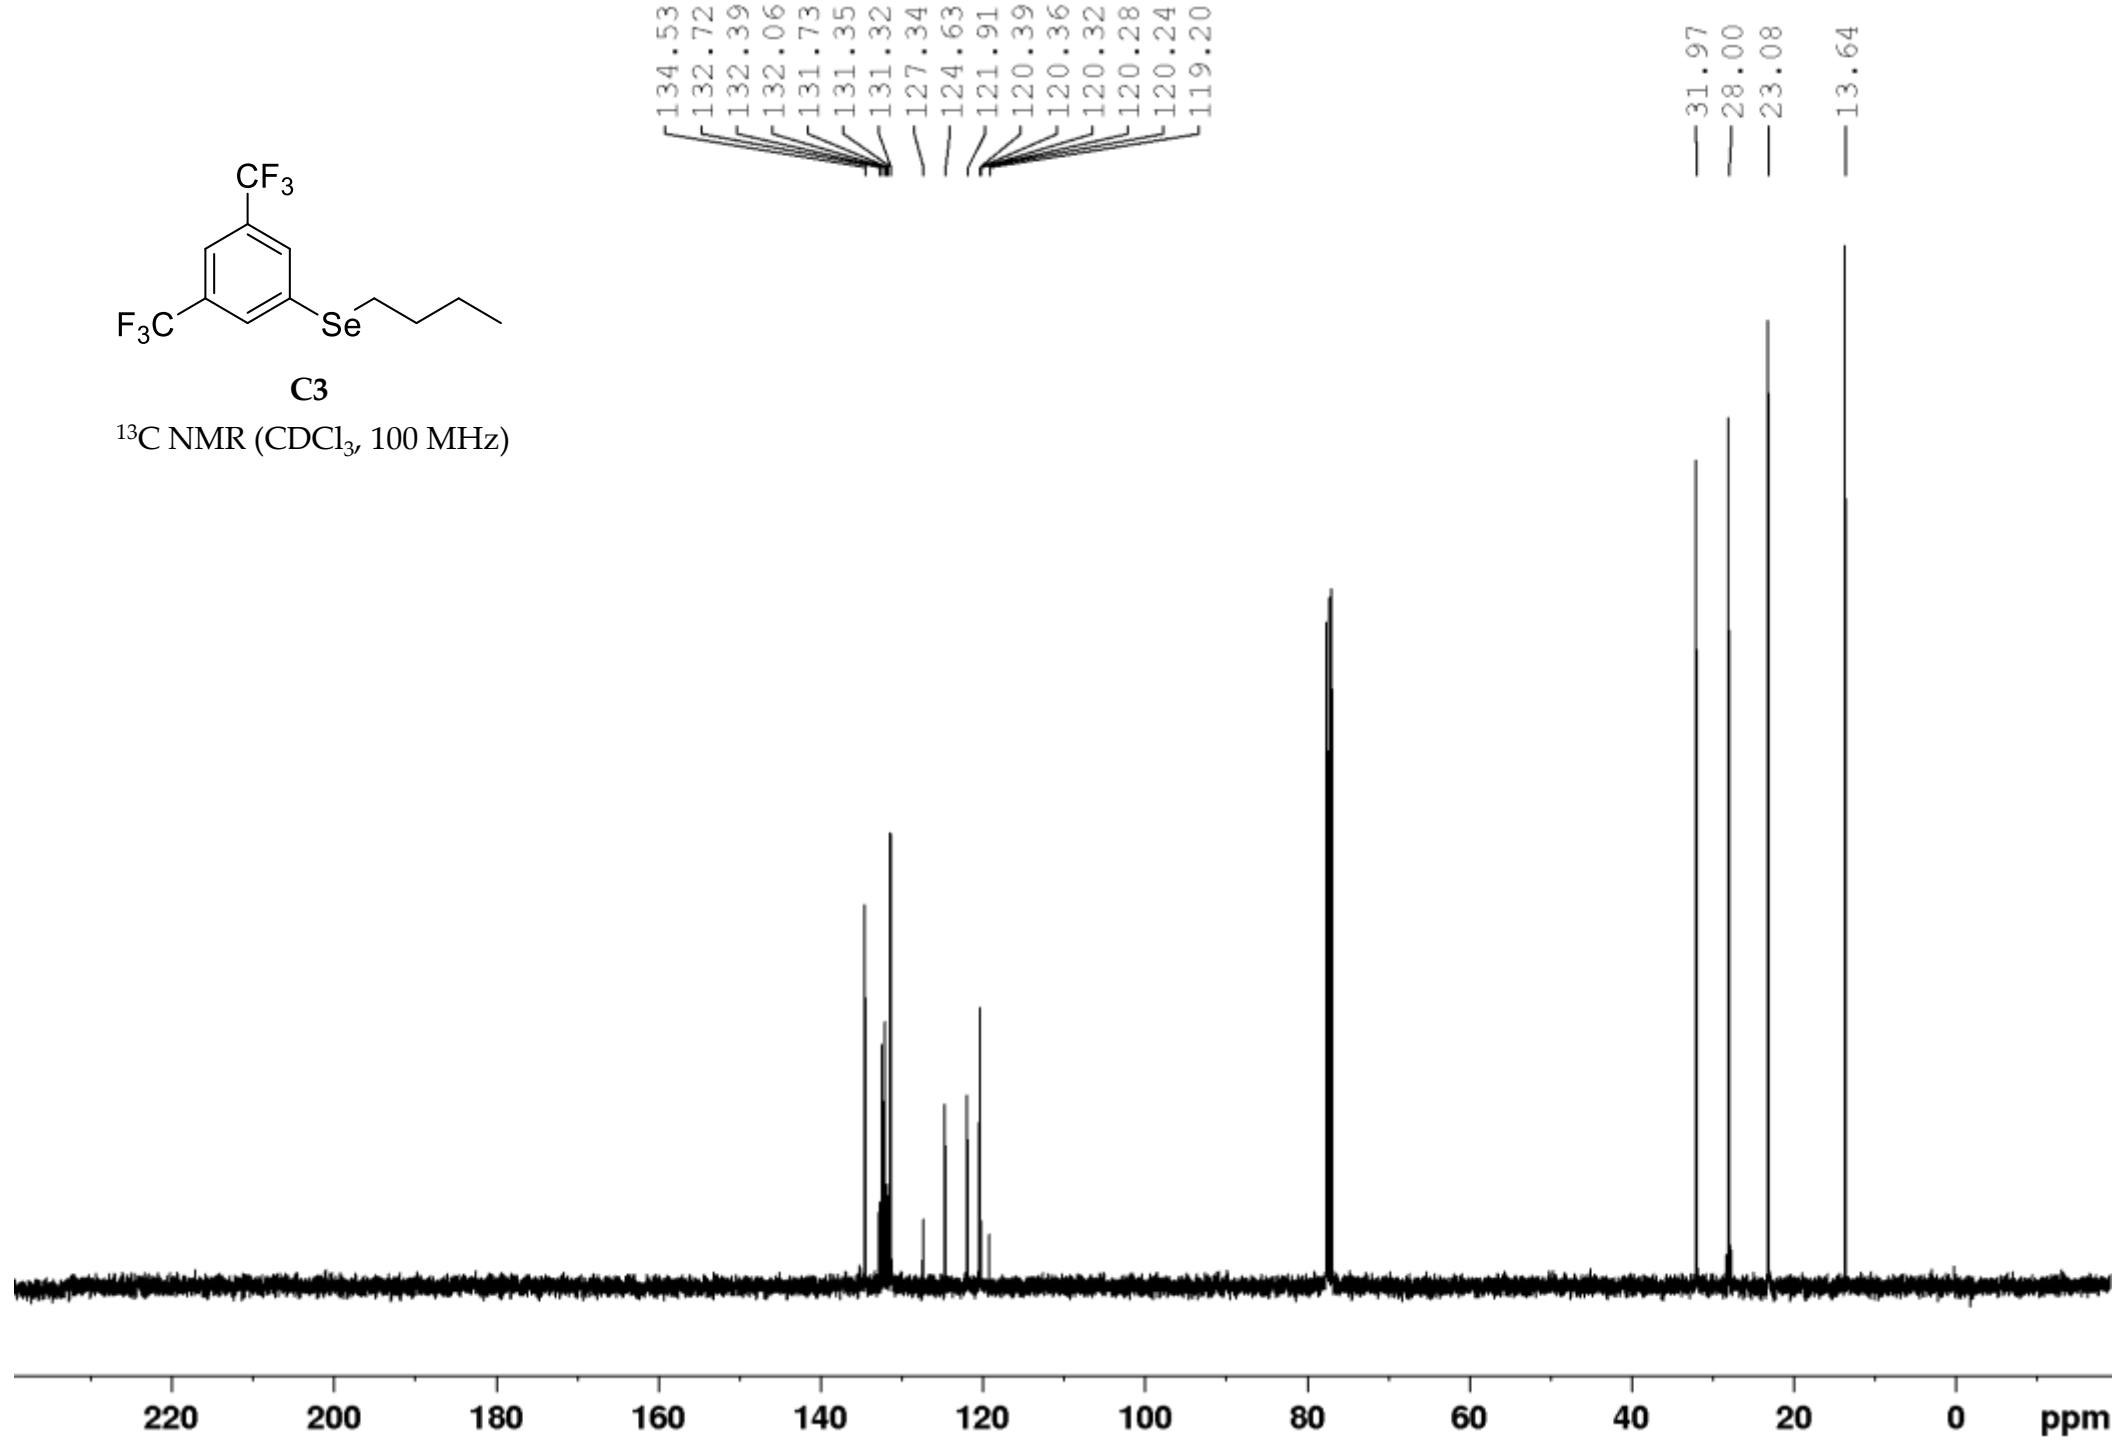

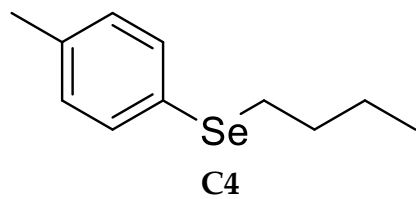

$^1\text{H}$  NMR ( $\text{CDCl}_3$ , 400 MHz)

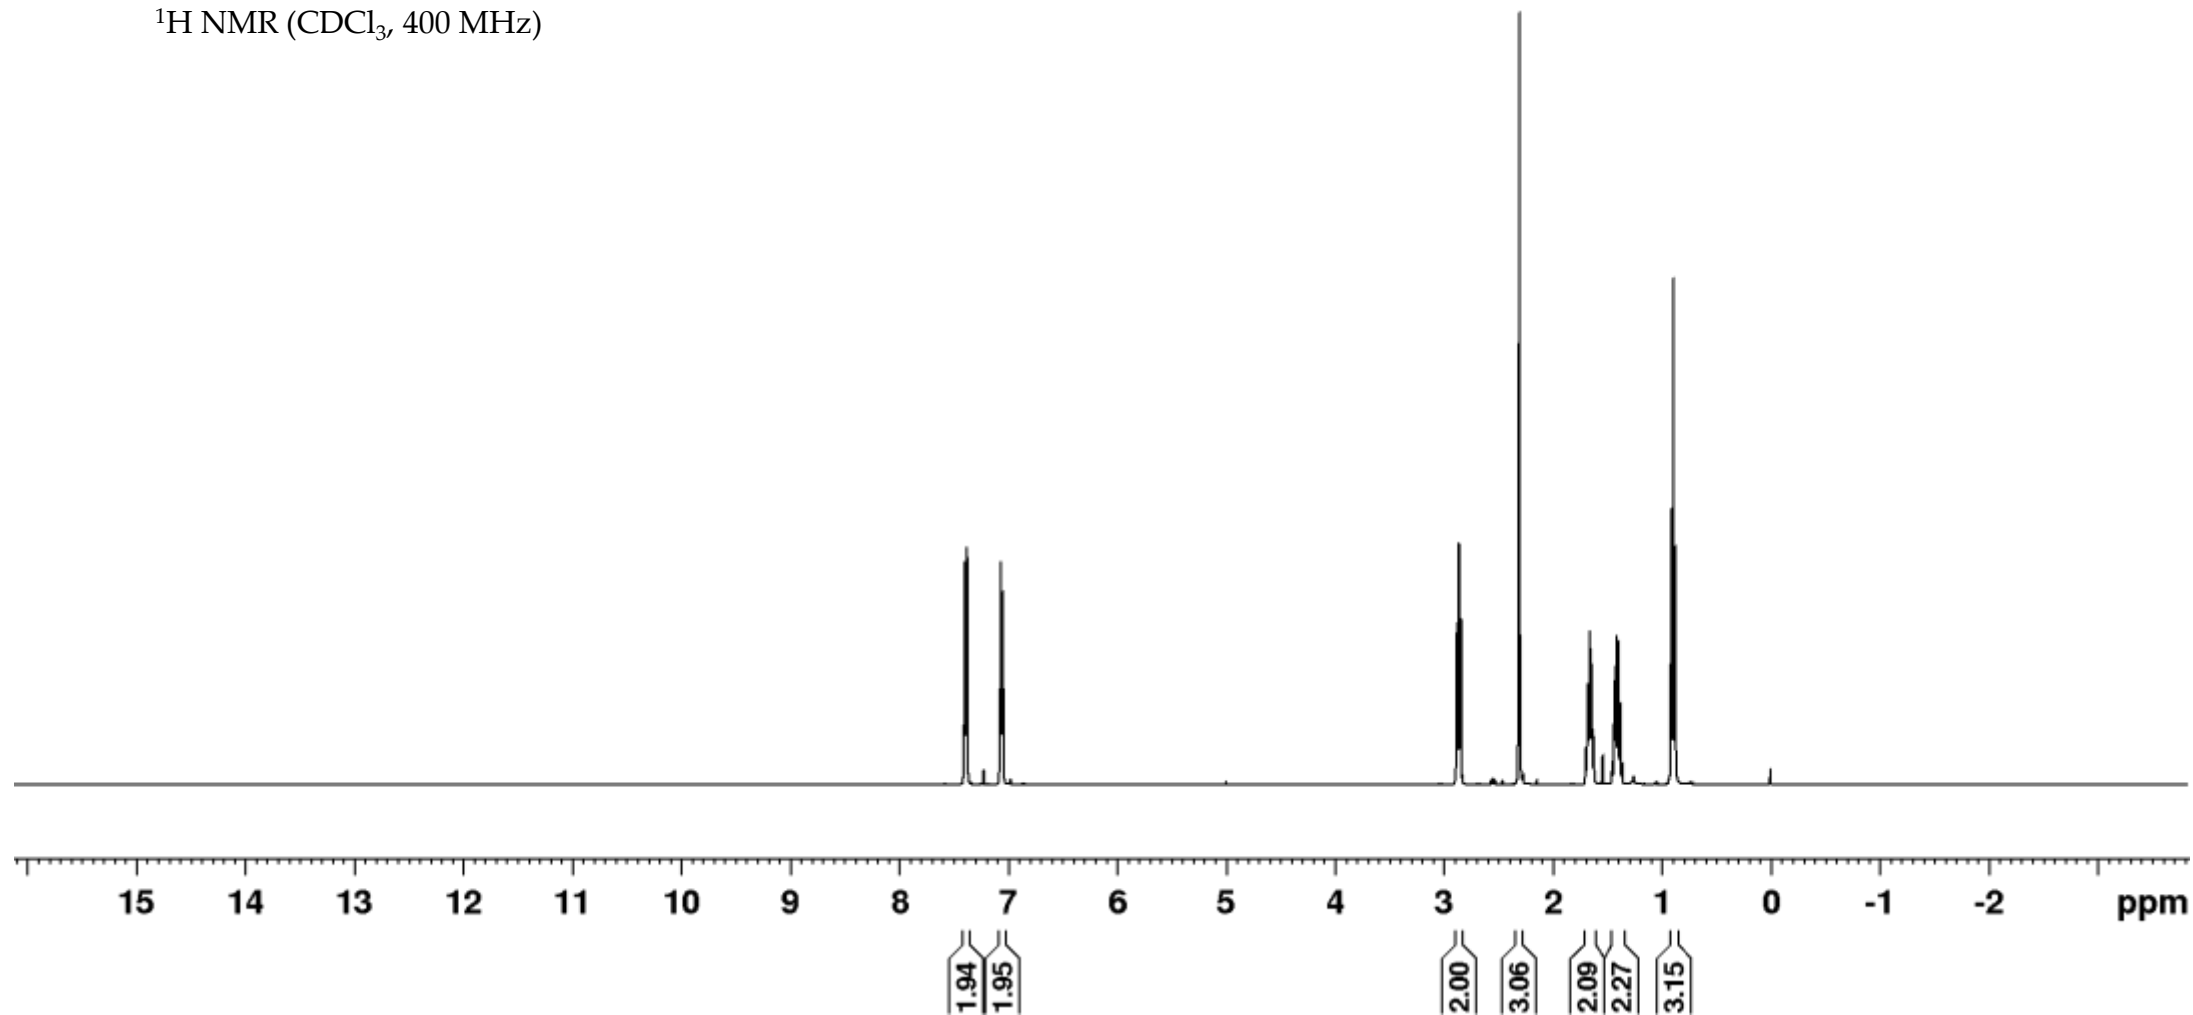

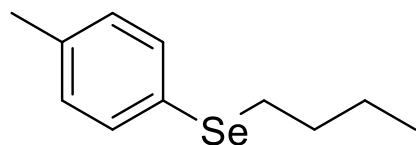

C4

$^{13}\text{C}$  NMR ( $\text{CDCl}_3$ , 100 MHz)

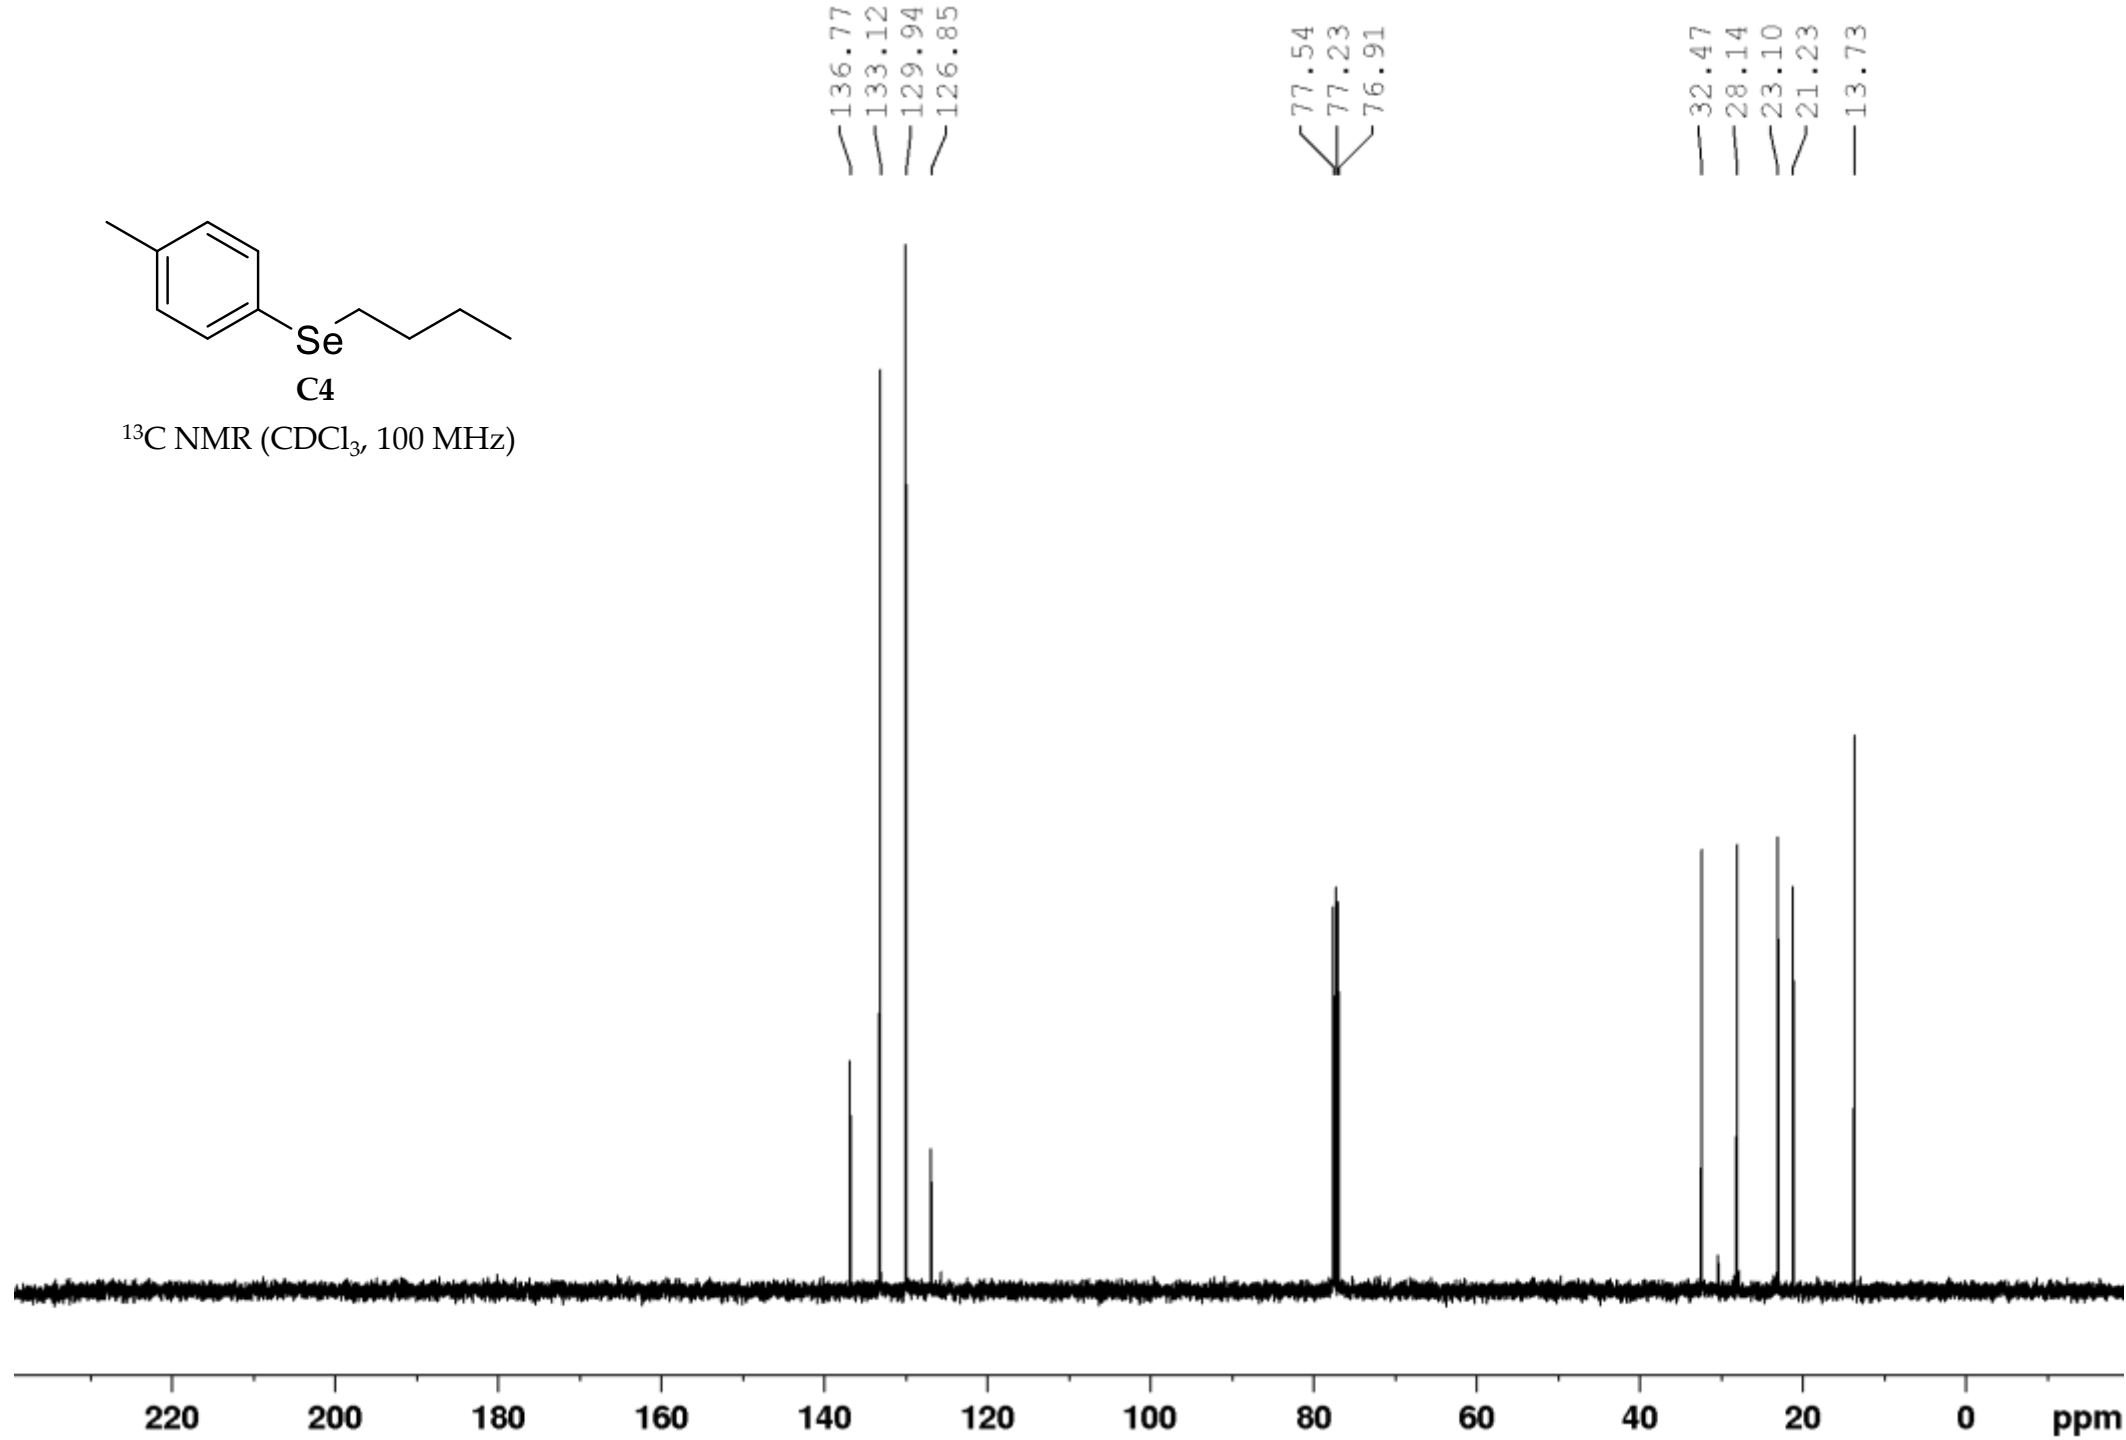

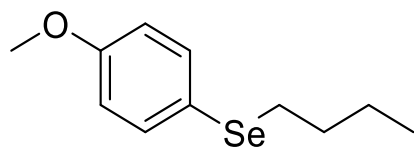

C5

$^1\text{H}$  NMR ( $\text{CDCl}_3$ , 400 MHz)

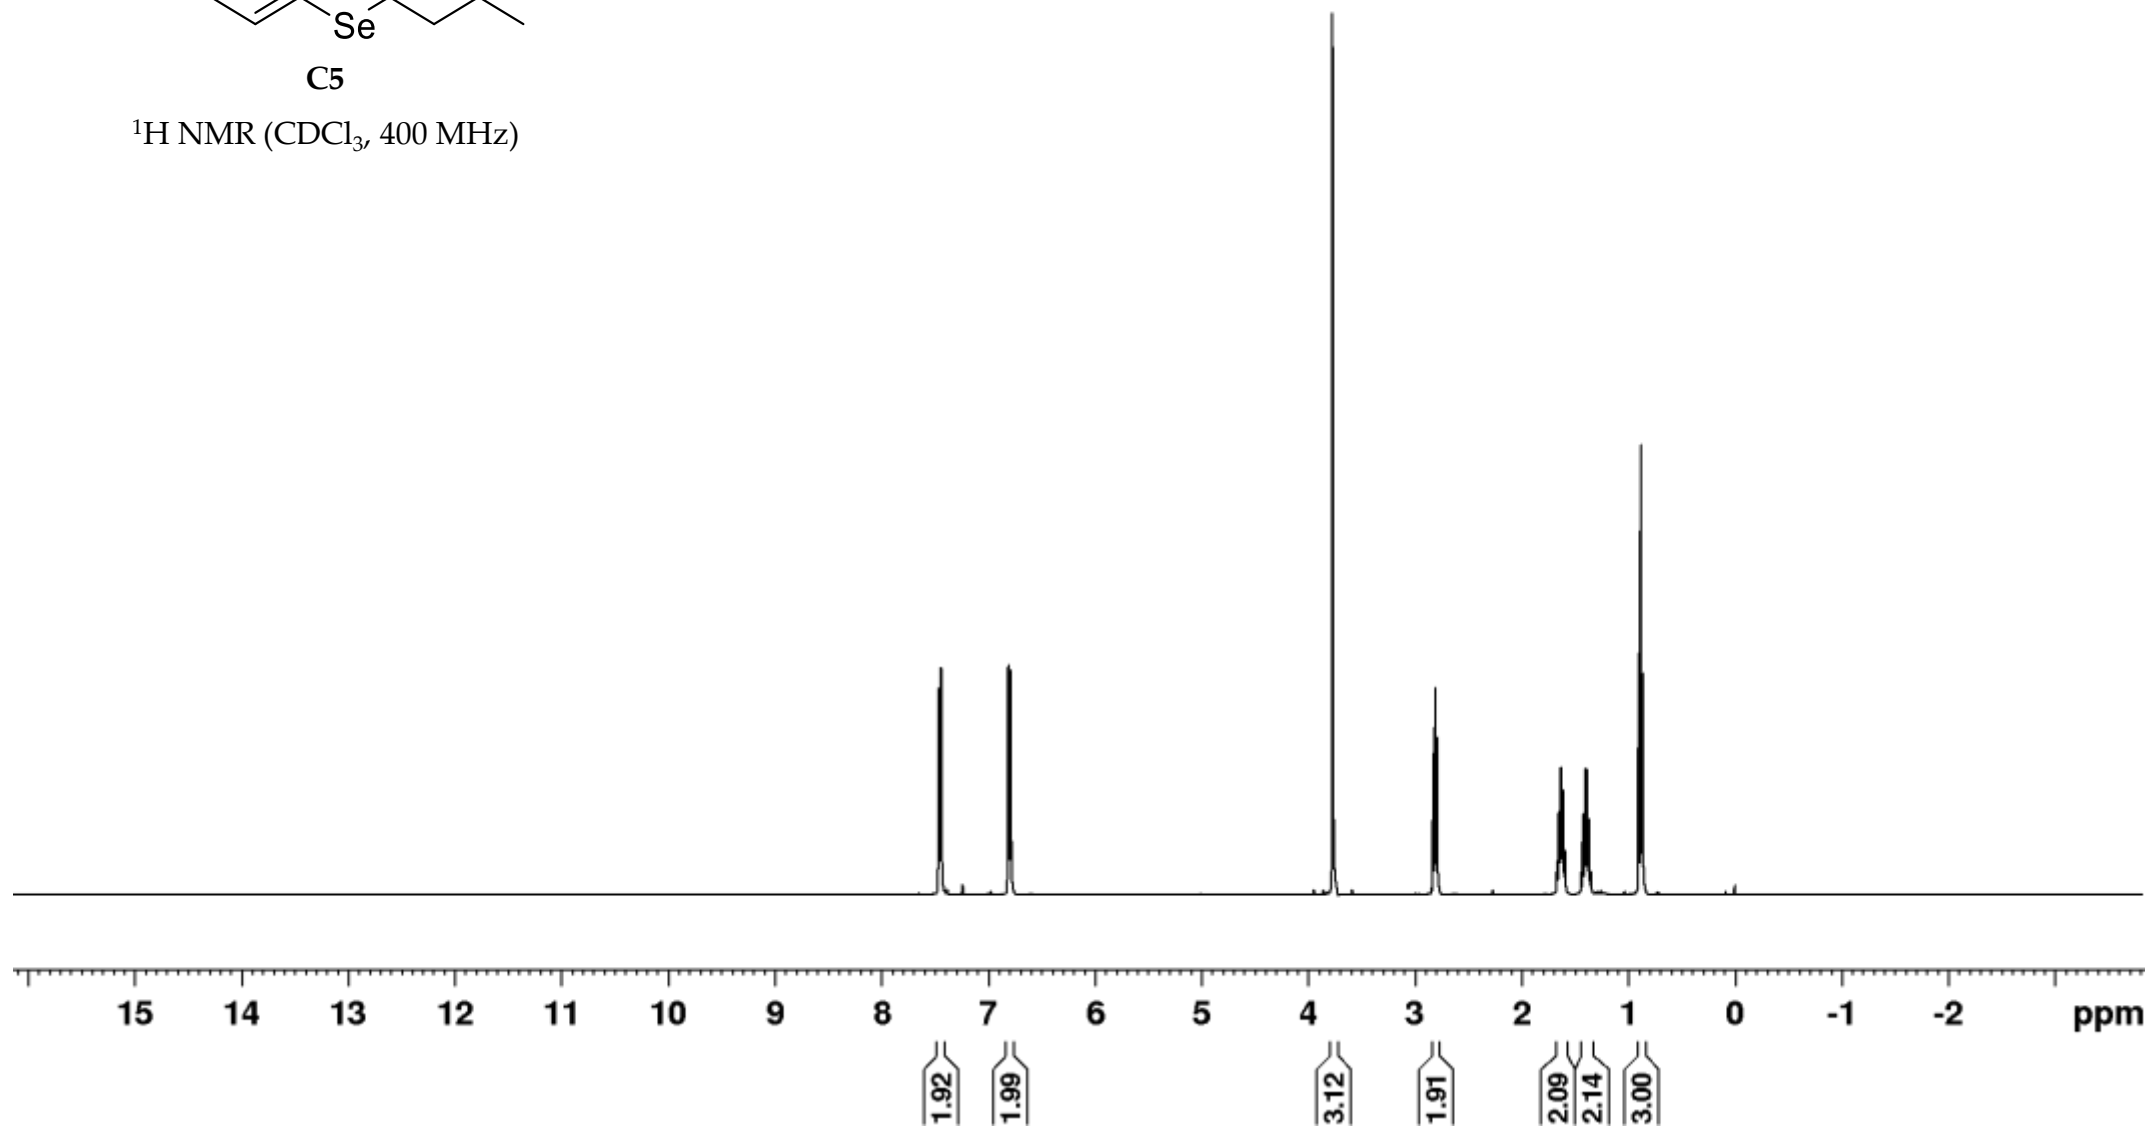

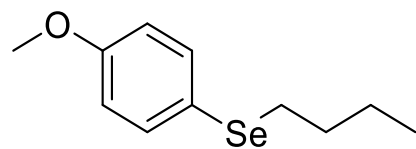

C5

$^{13}\text{C}$  NMR ( $\text{CDCl}_3$ , 100 MHz)

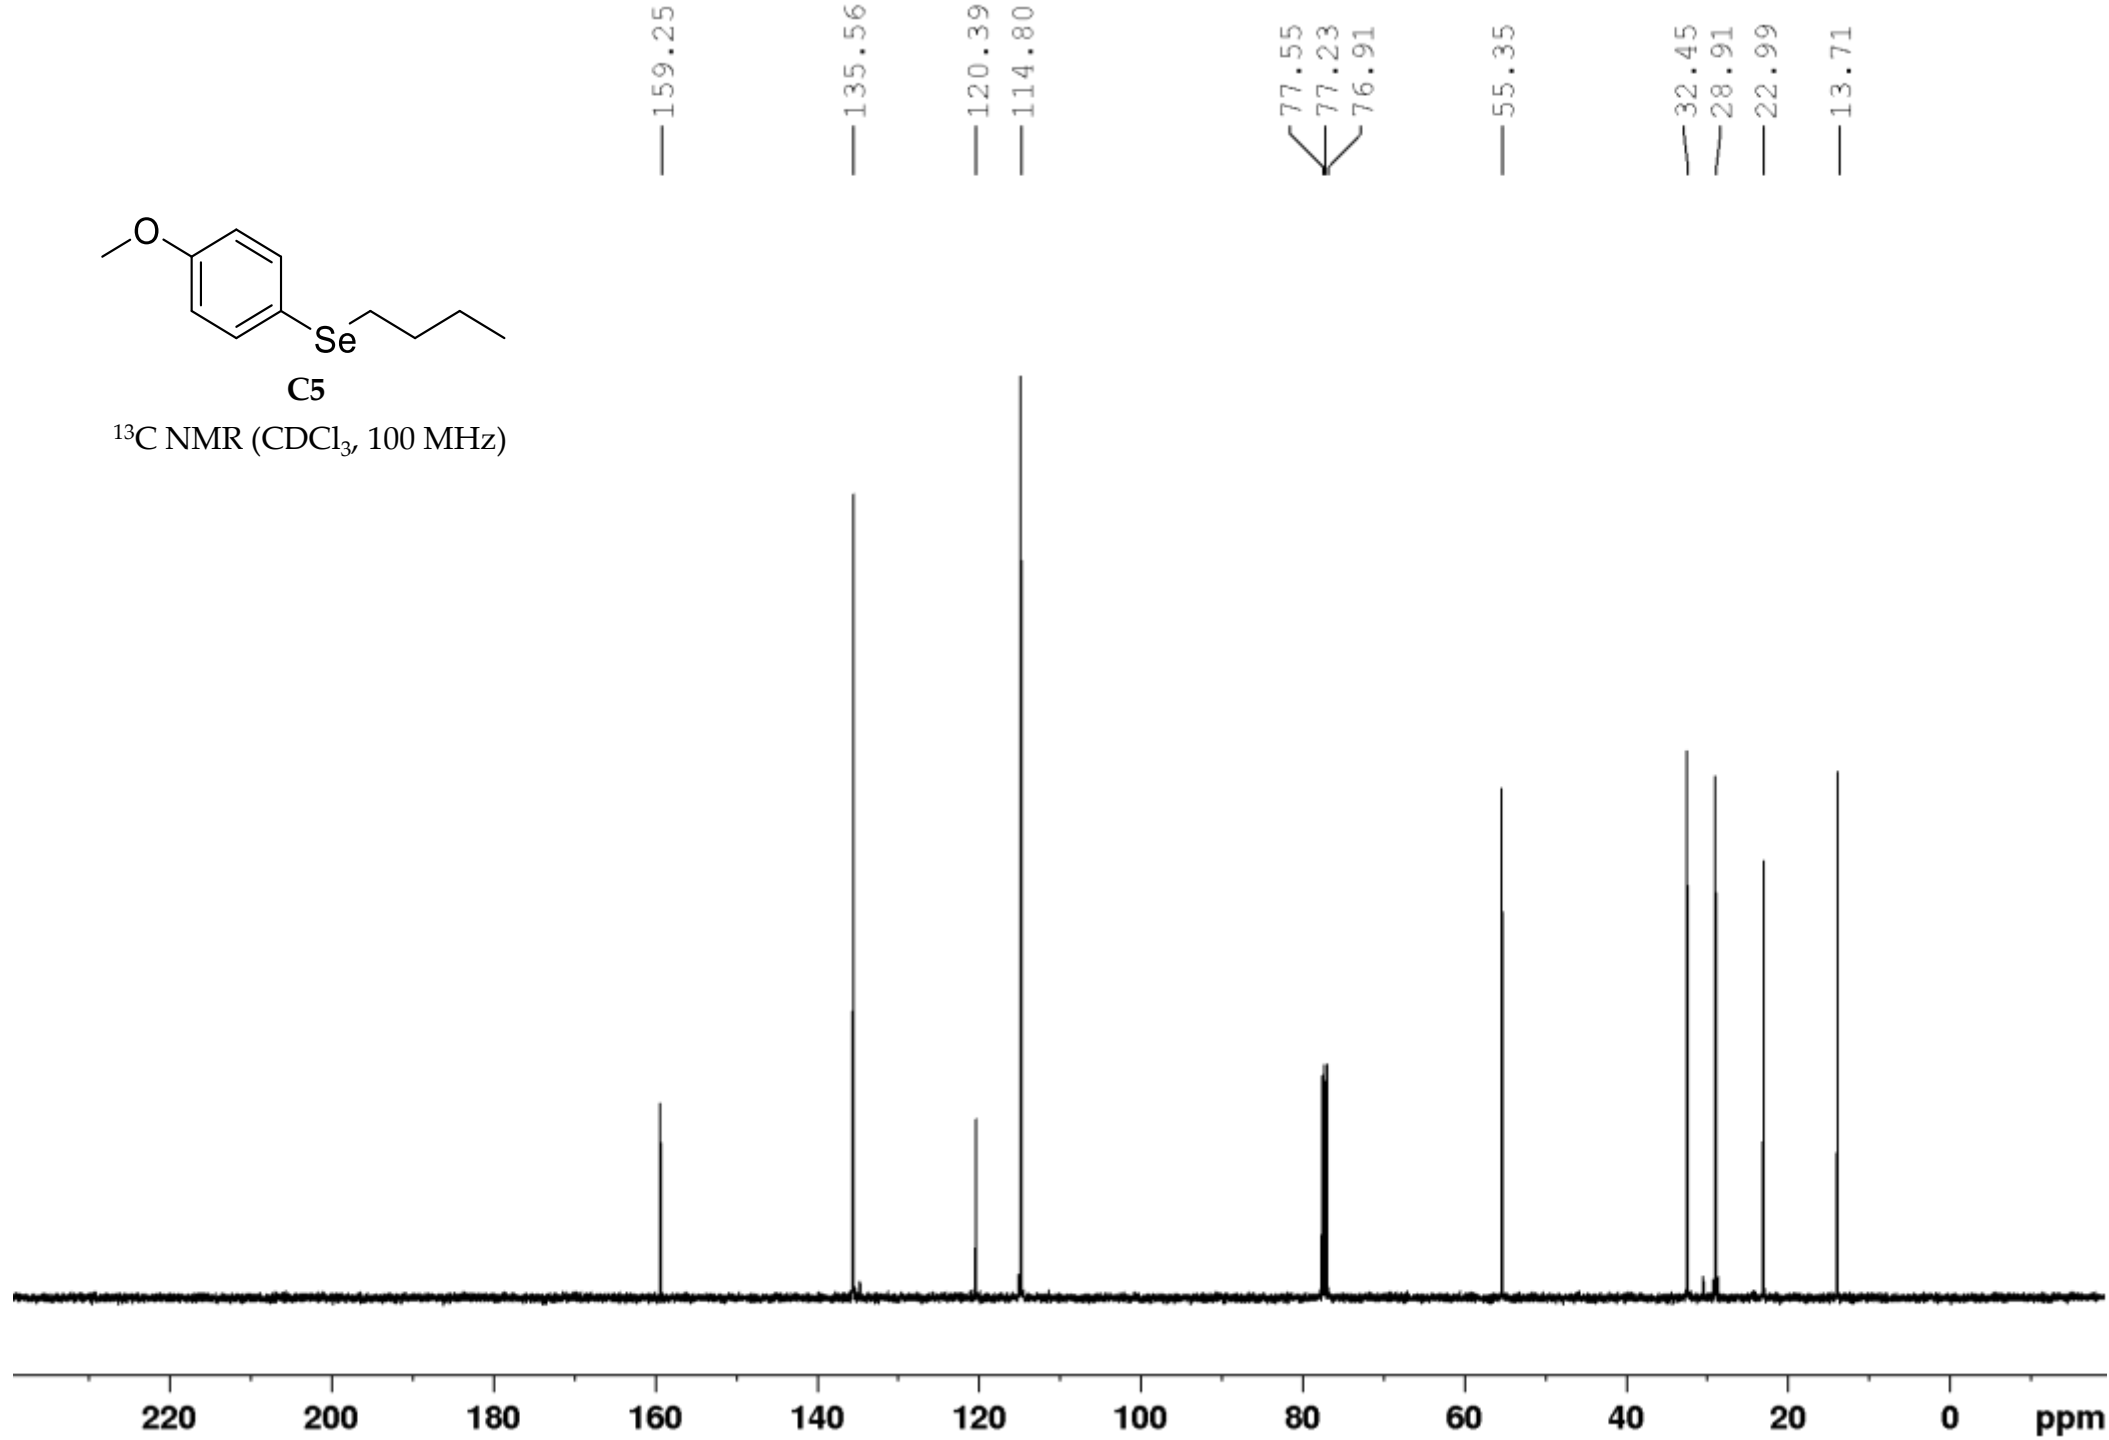

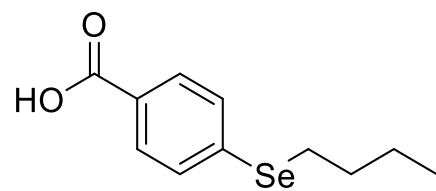

**C6**

$^1\text{H}$  NMR ( $\text{CDCl}_3$ , 400 MHz)

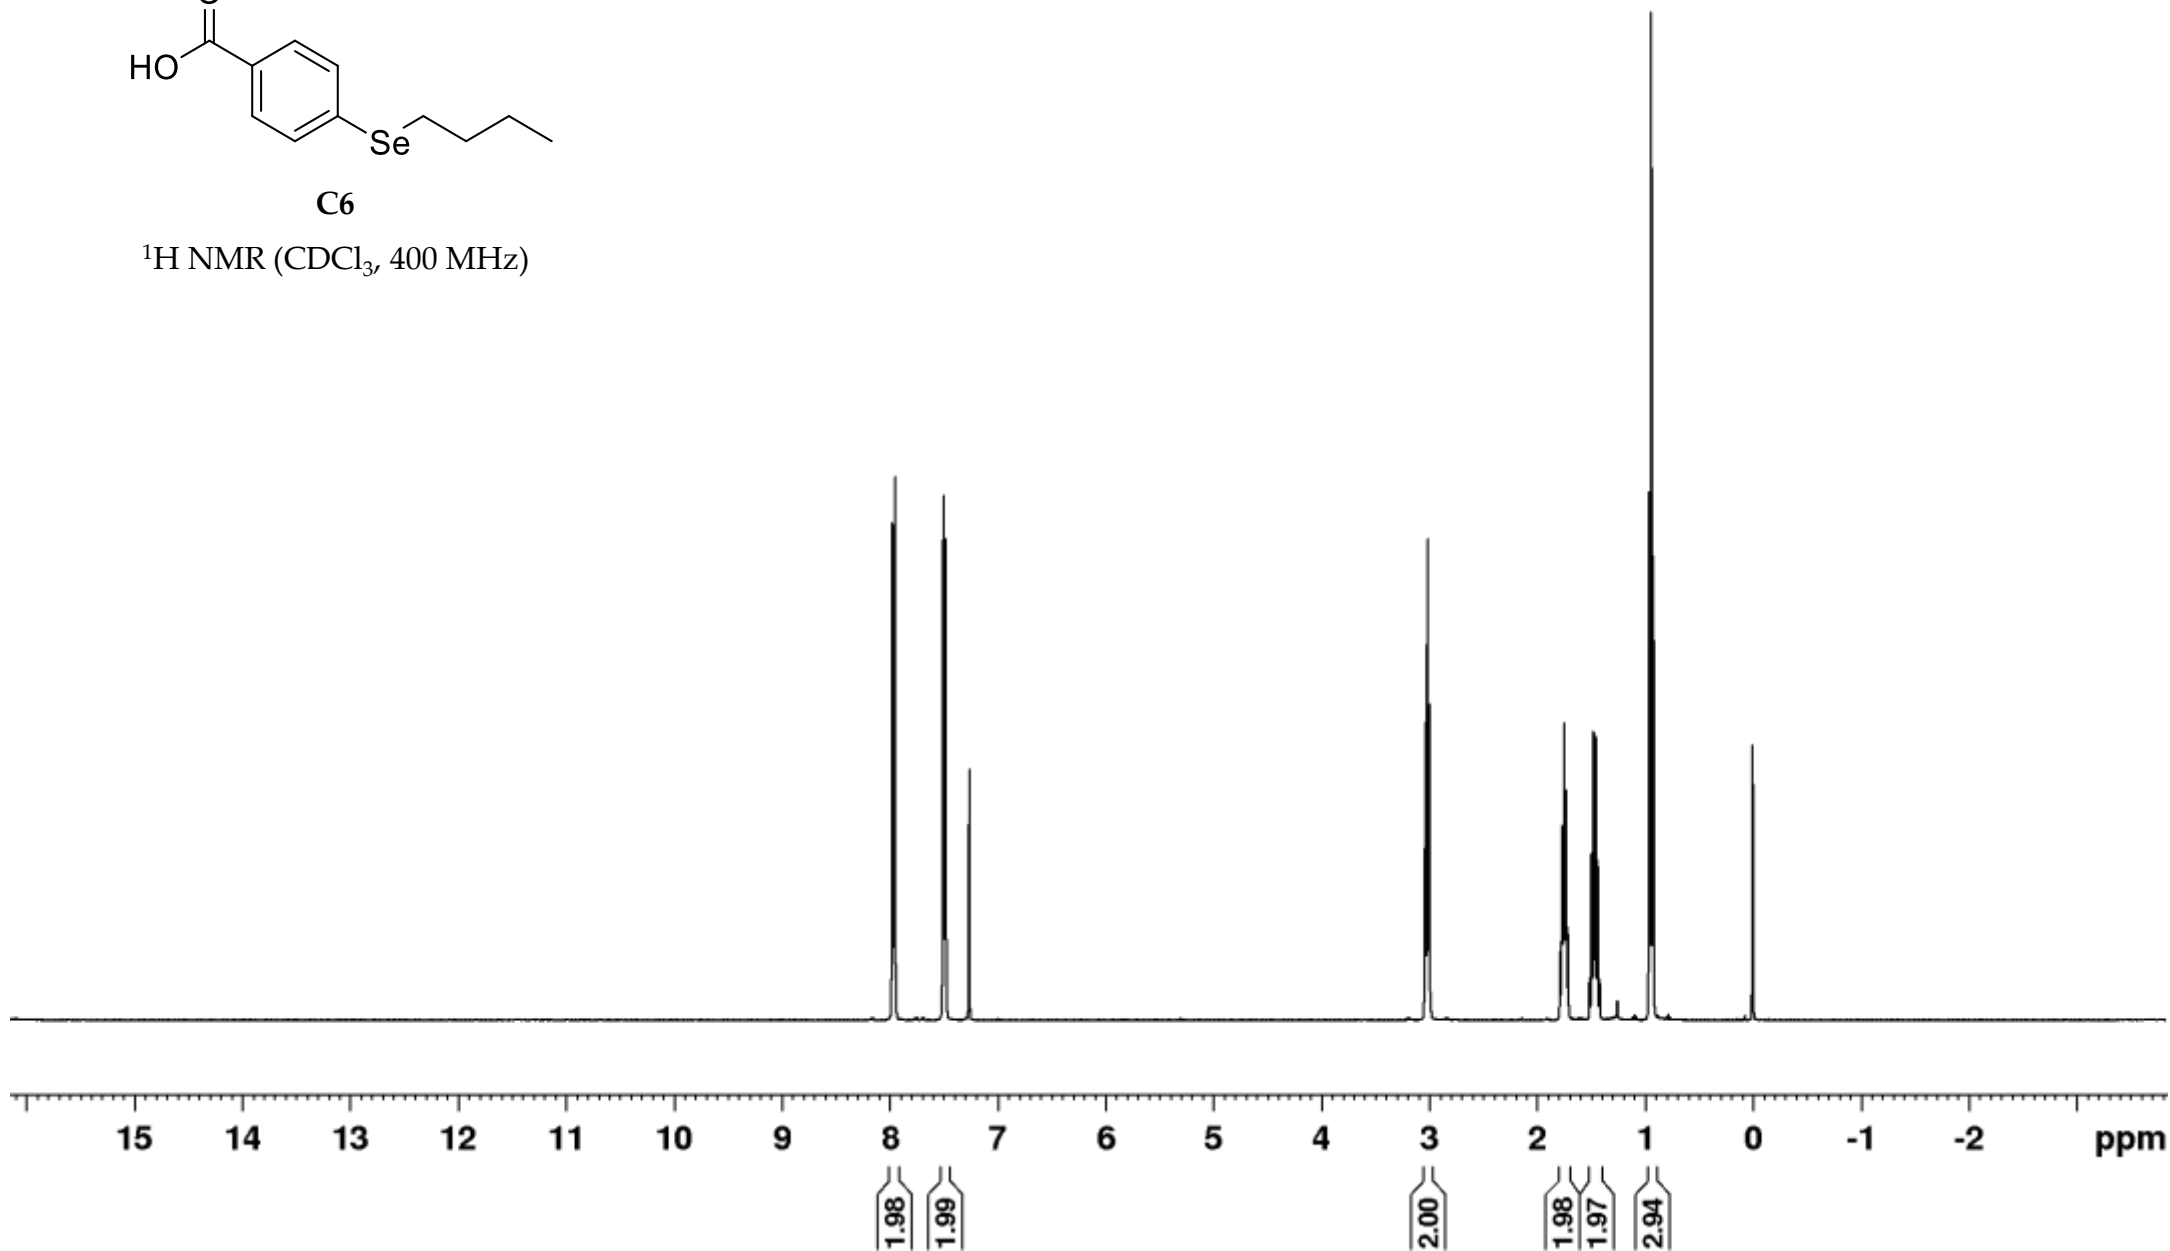

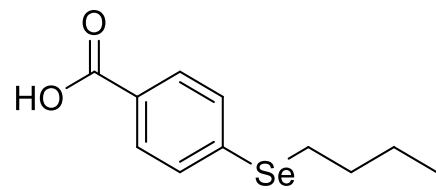

**C6**

$^{13}\text{C}$  NMR ( $\text{CDCl}_3$ , 100 MHz)

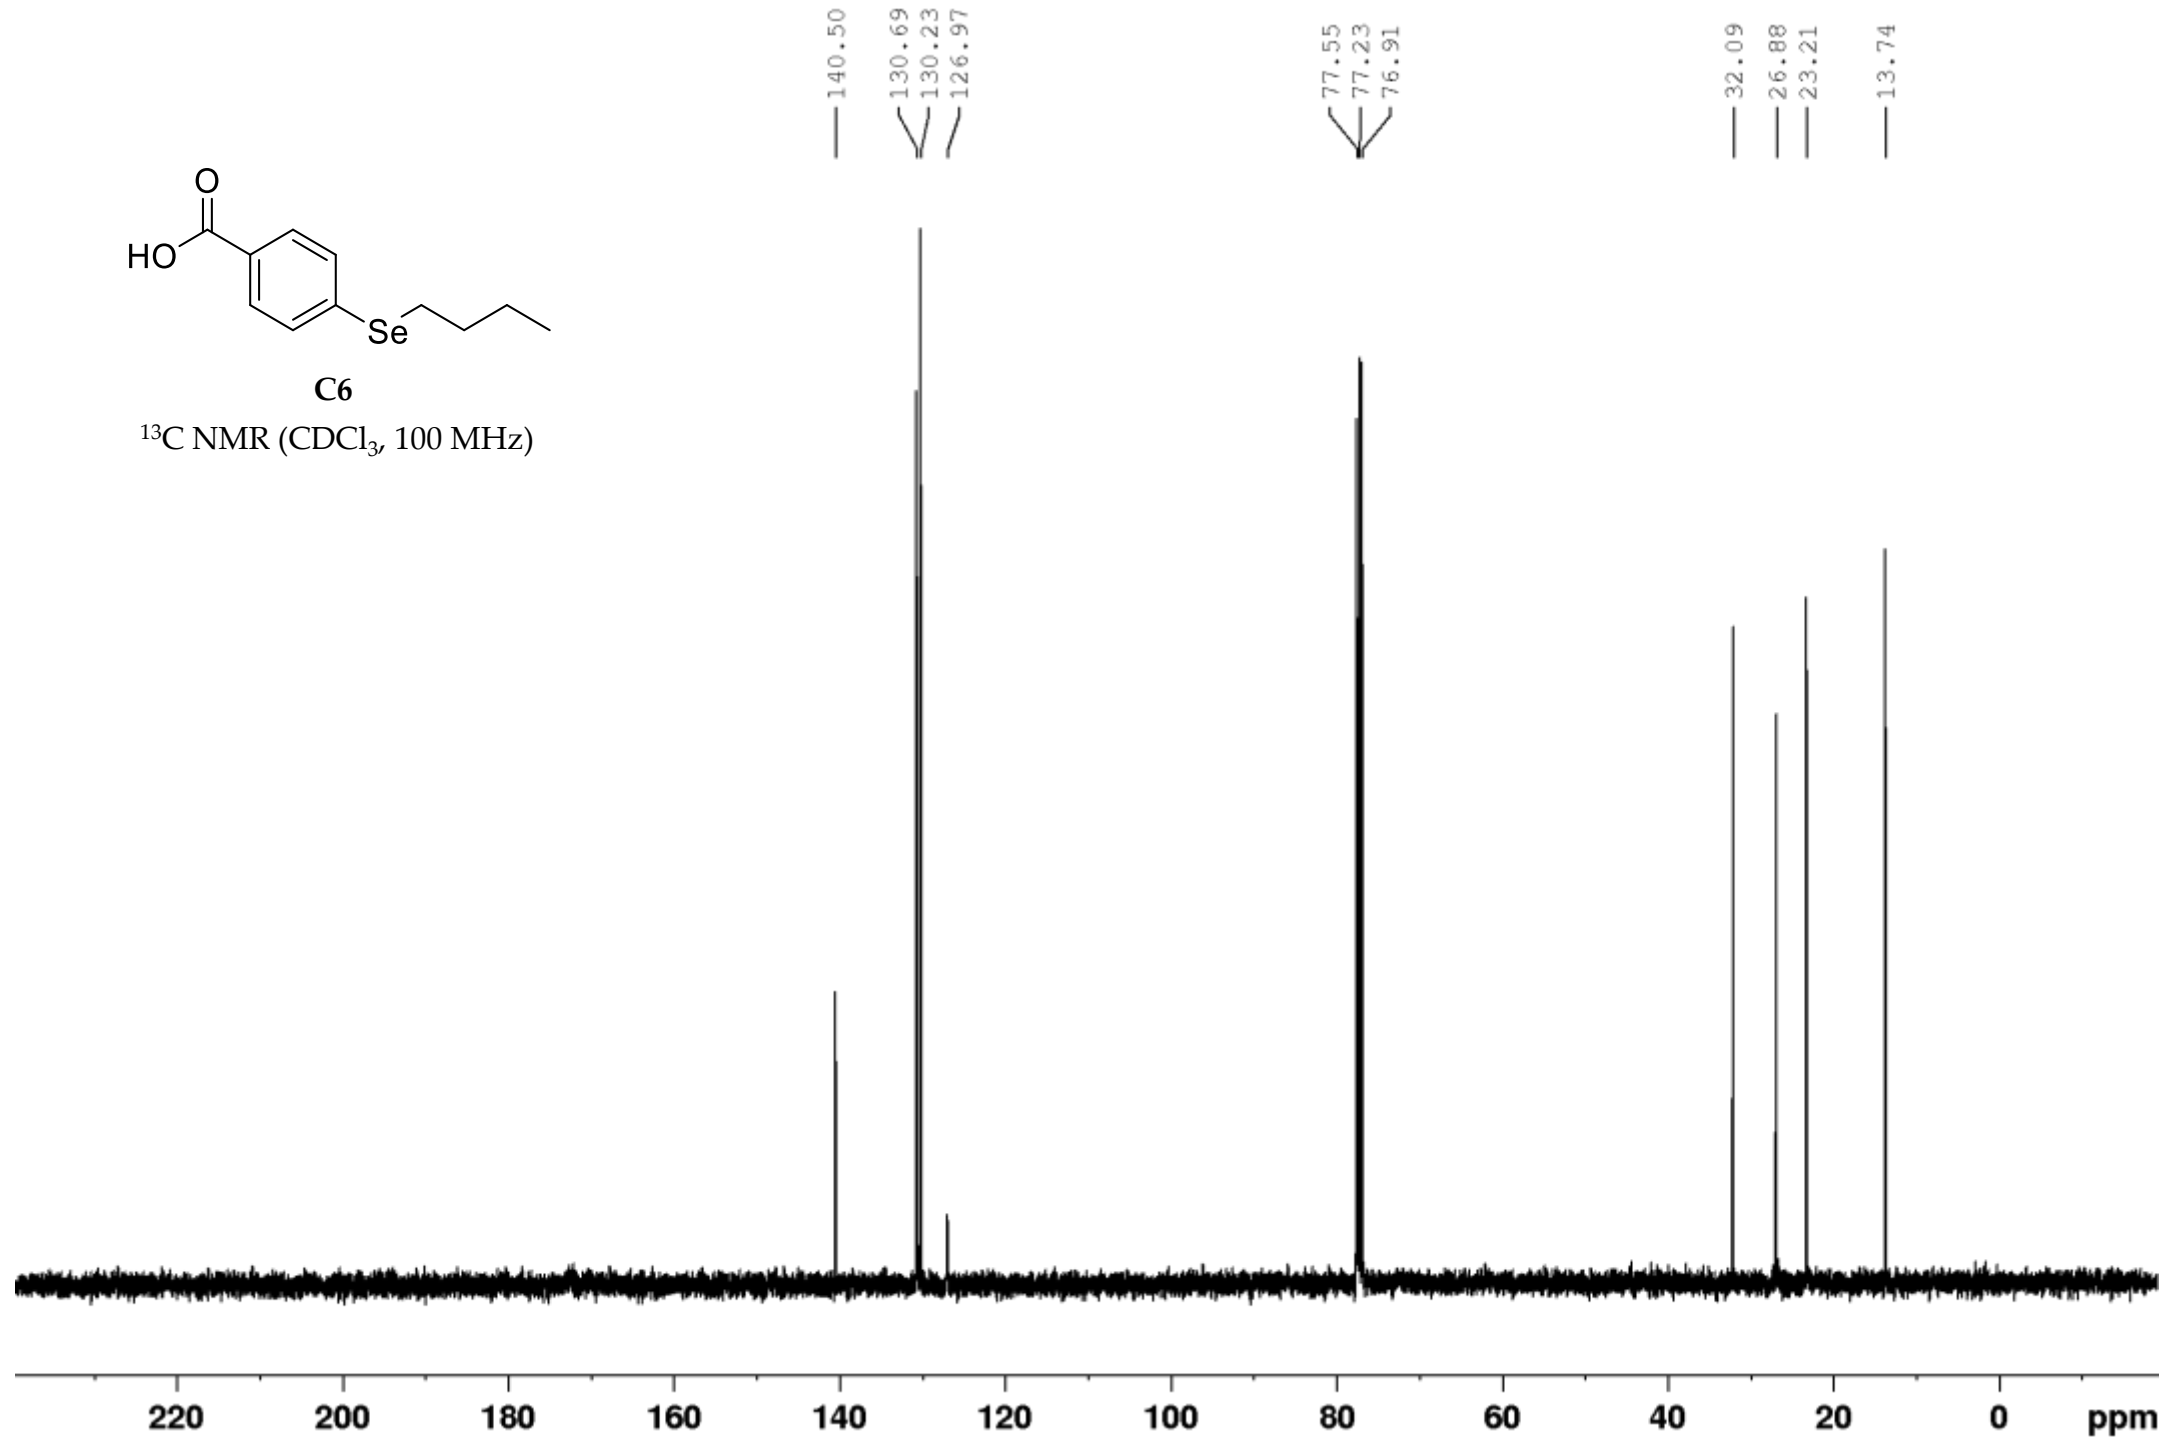



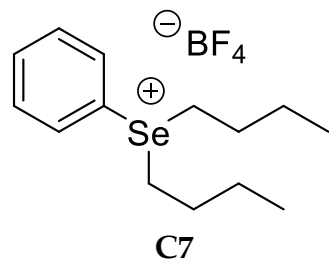

$^1\text{H}$  NMR ( $\text{CDCl}_3$ , 400 MHz)

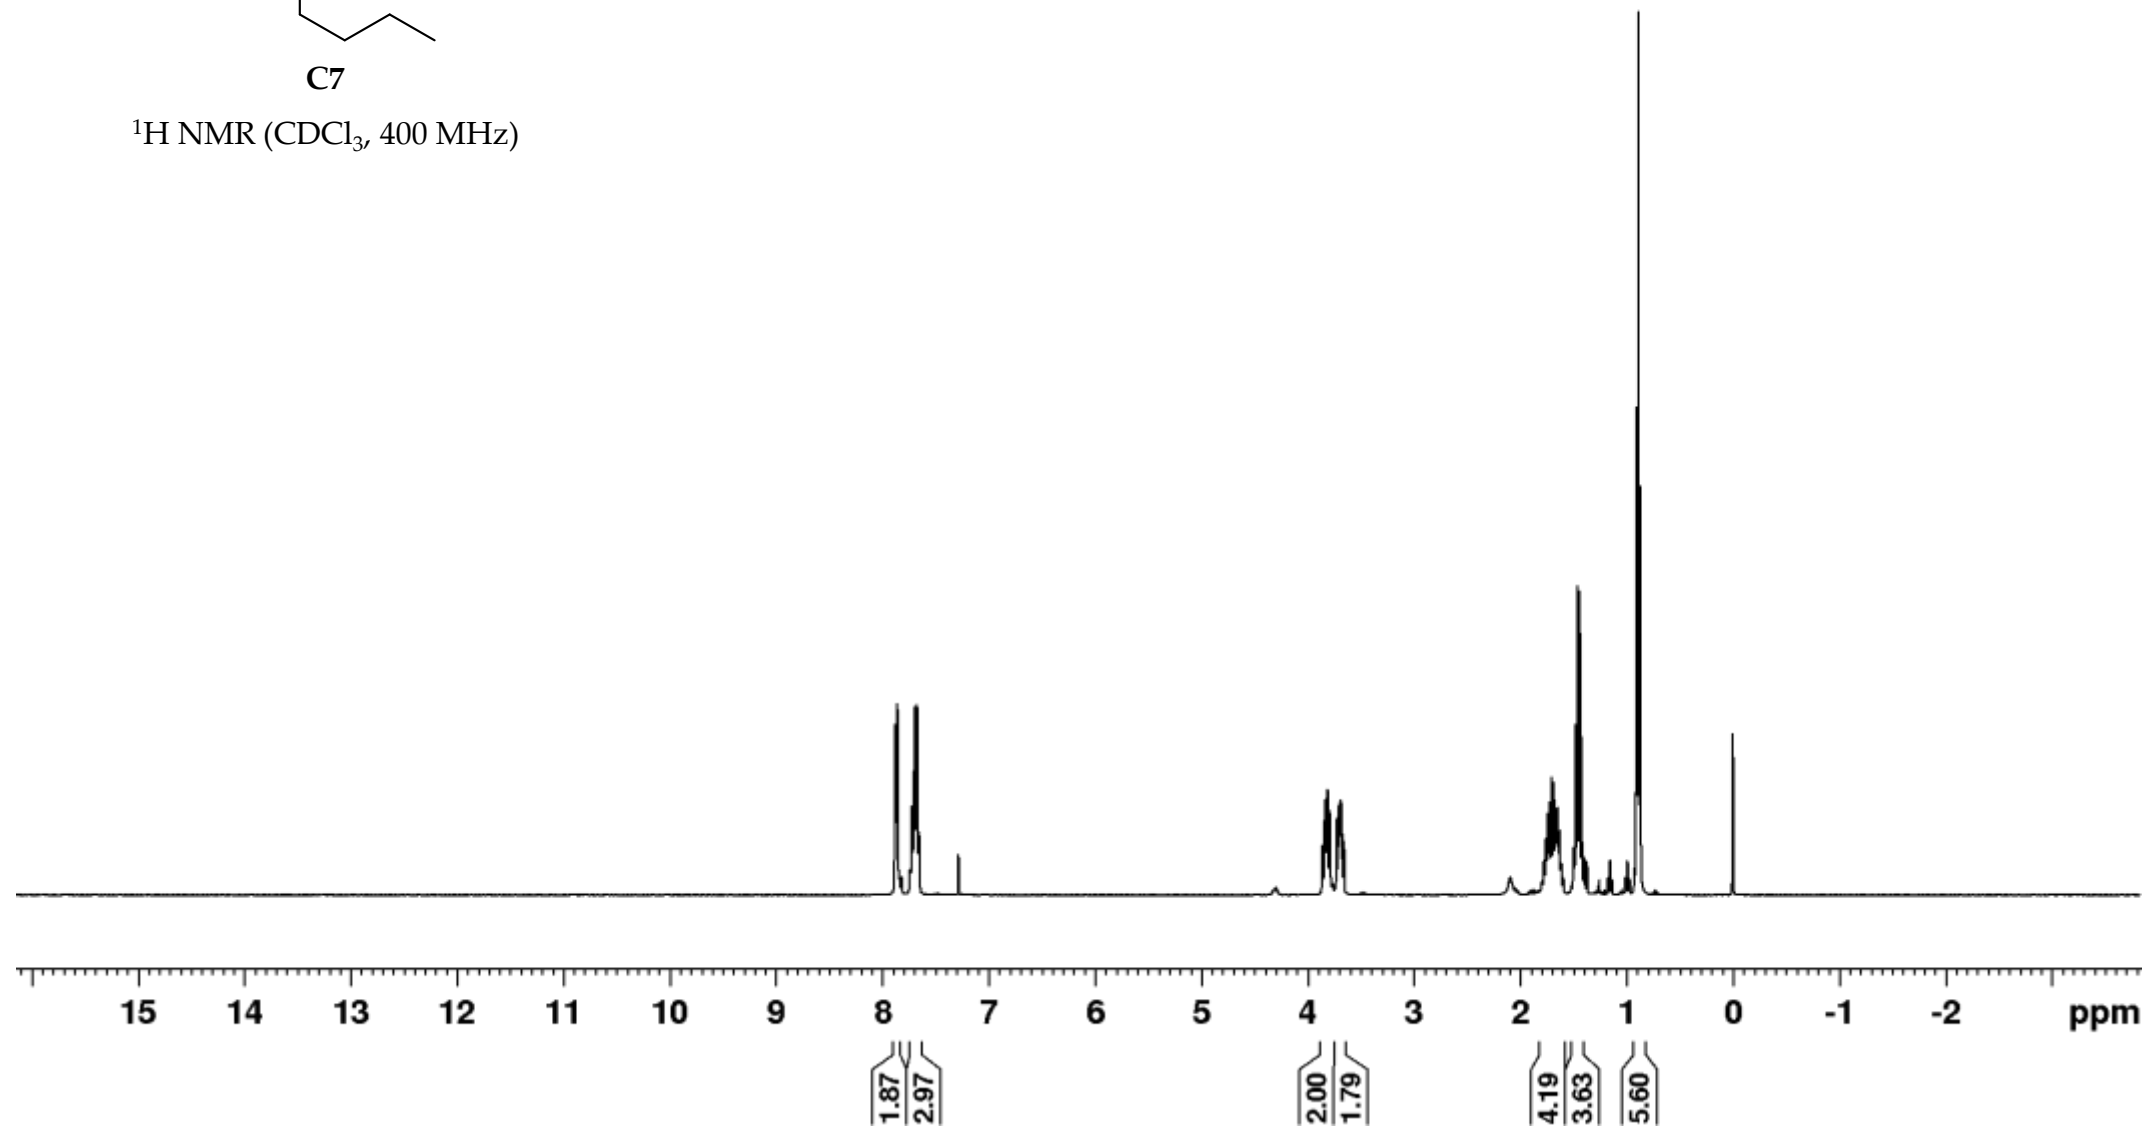

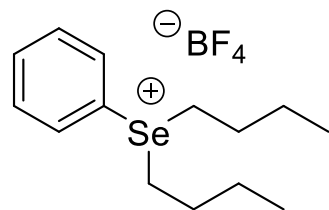

**C7**

$^{13}\text{C}$  NMR ( $\text{CDCl}_3$ , 100 MHz)

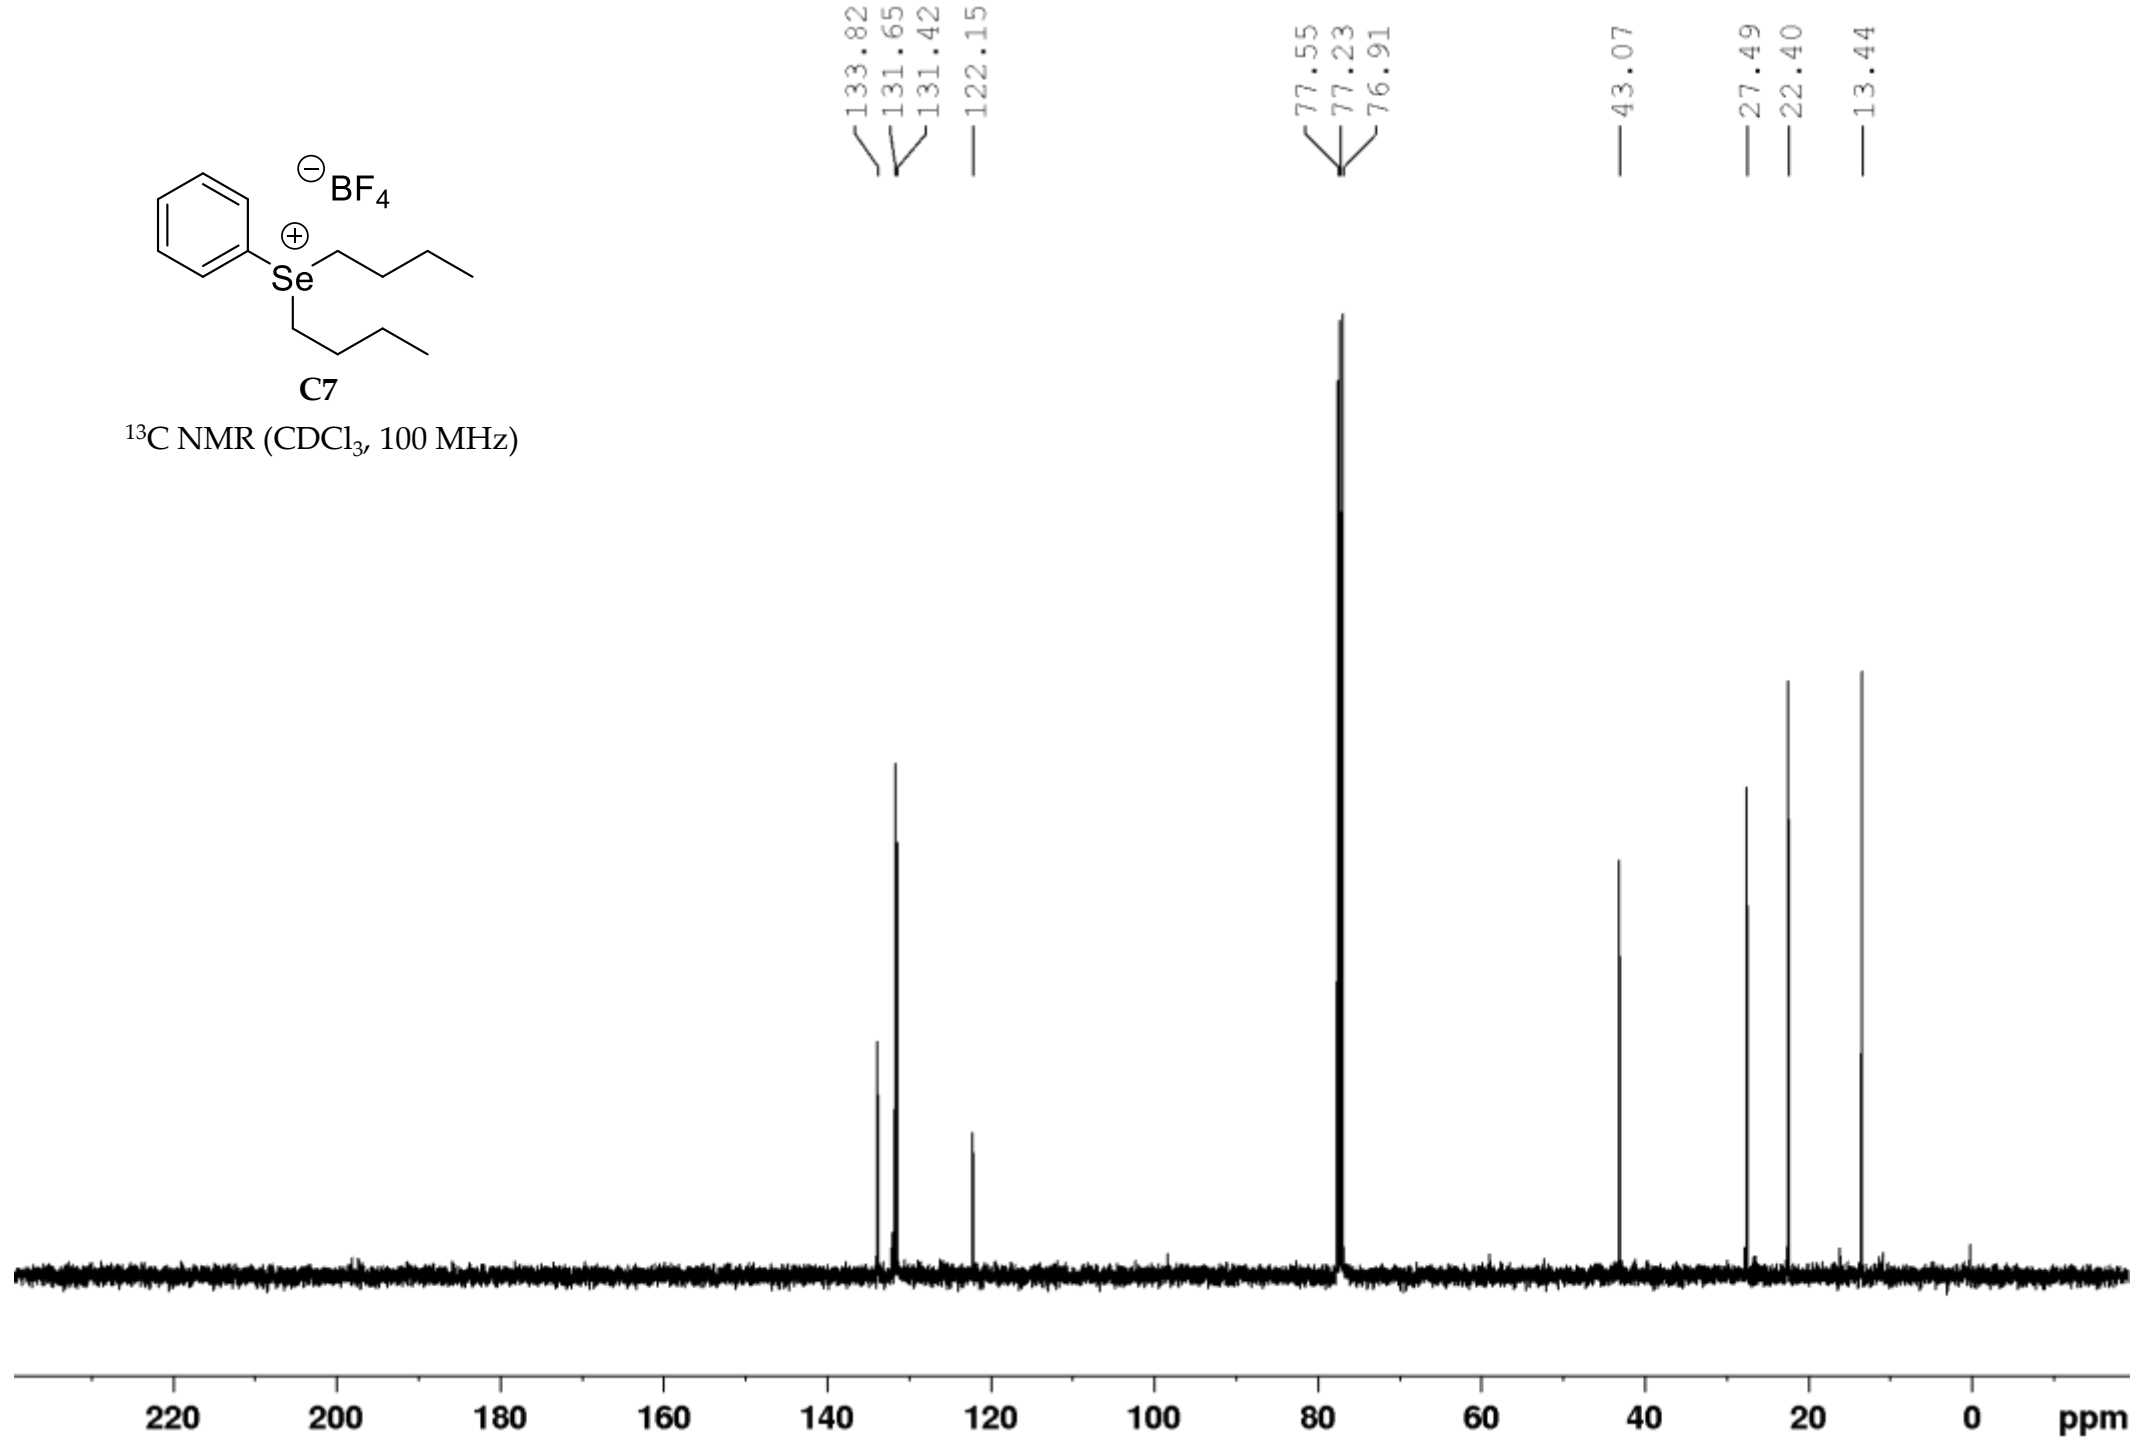

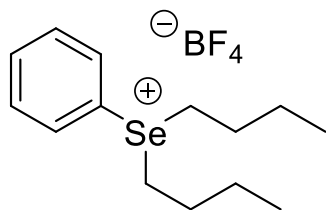

C7

$^{77}\text{Se}$  NMR ( $\text{CDCl}_3$ , 76 MHz)

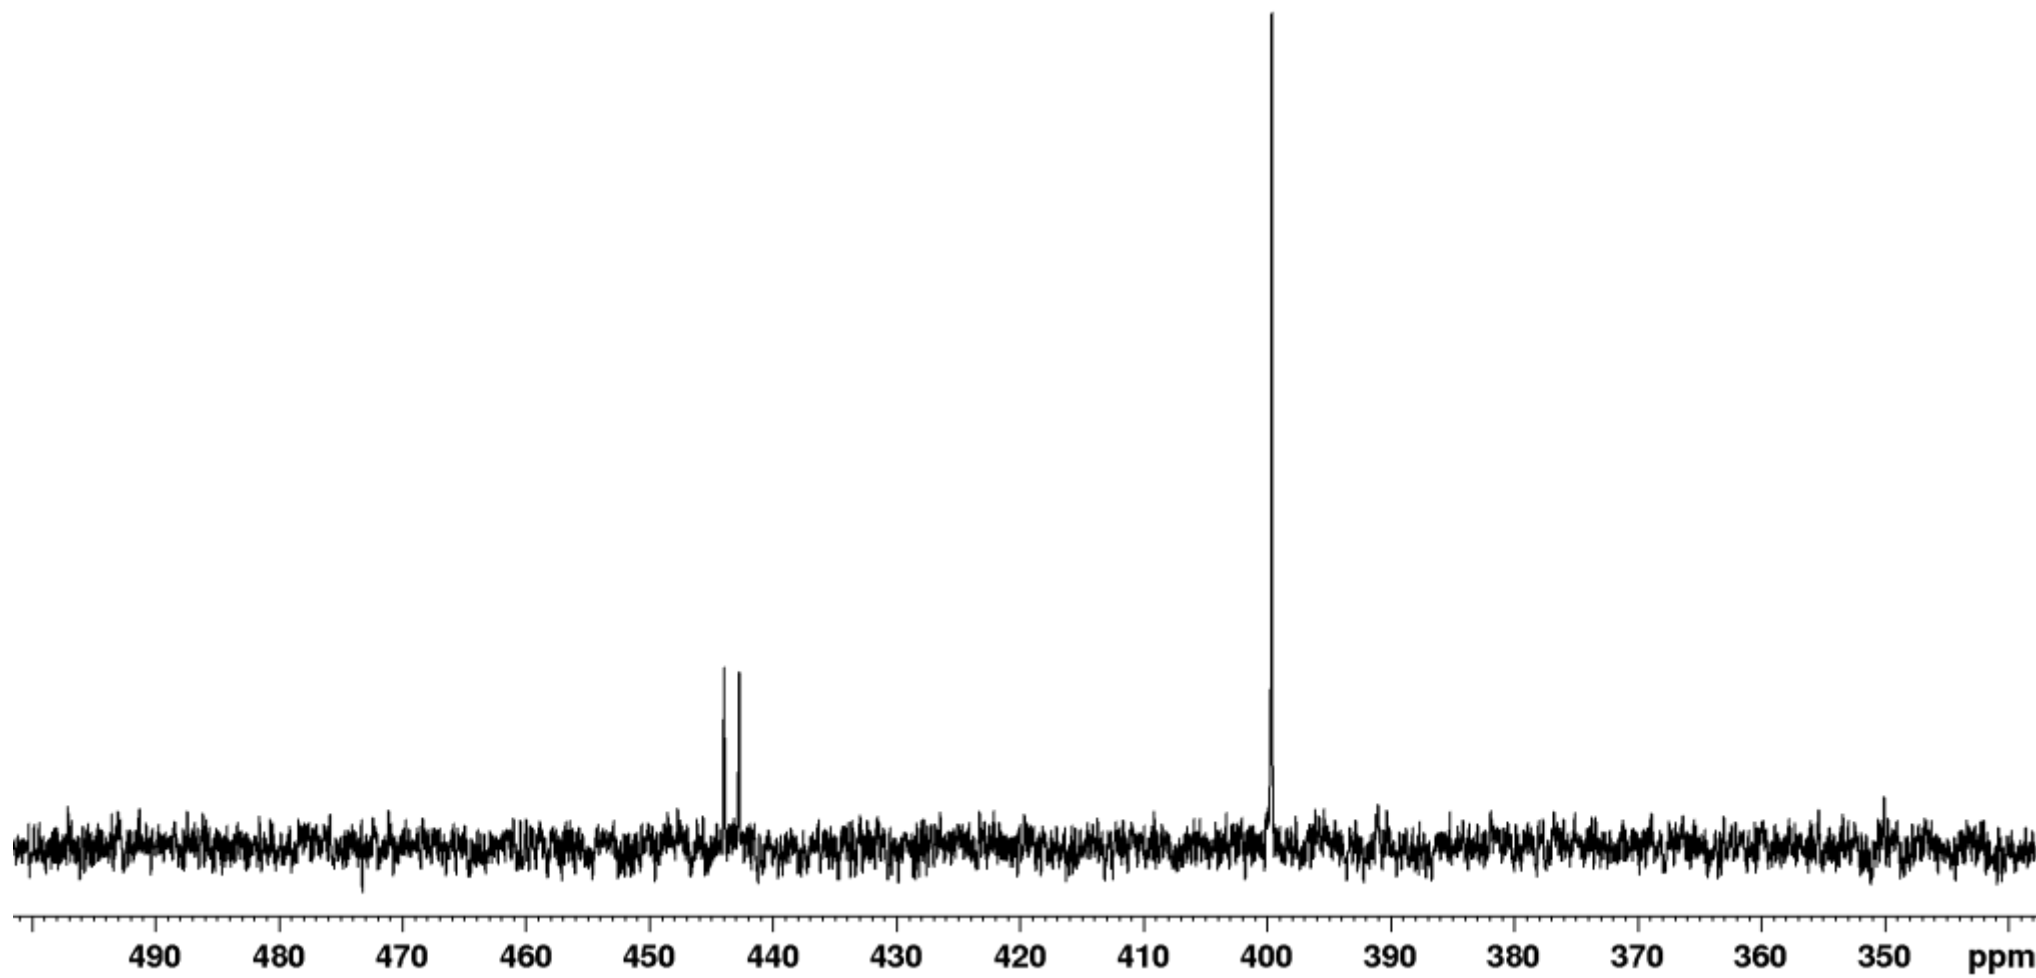

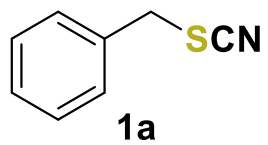

$^1\text{H}$  NMR ( $\text{CDCl}_3$ , 400 MHz)

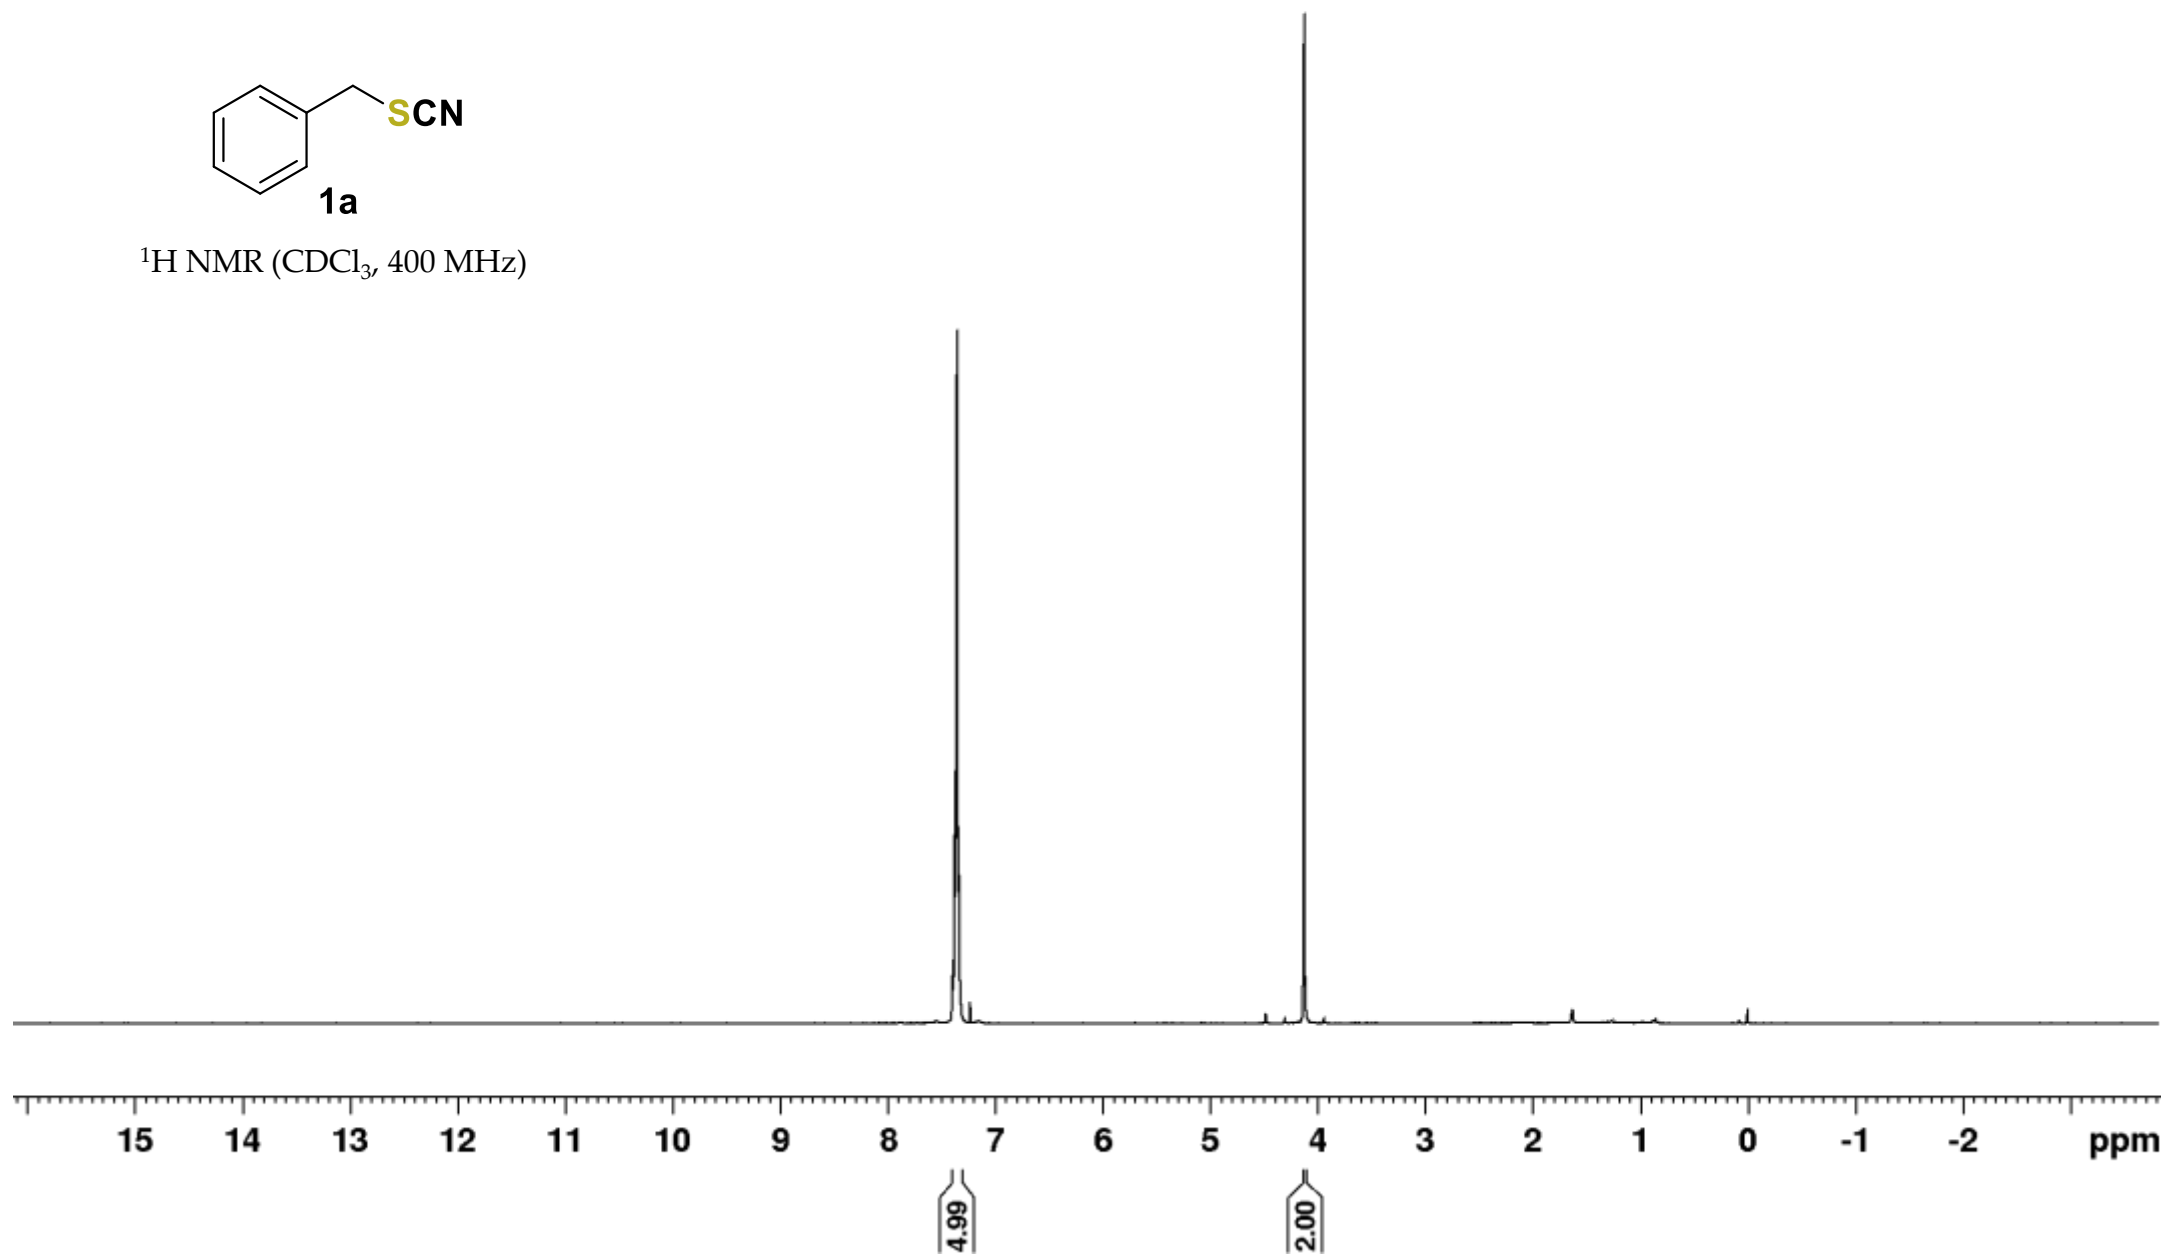

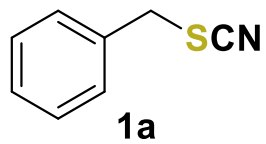

$^{13}\text{C}$  NMR ( $\text{CDCl}_3$ , 100 MHz)

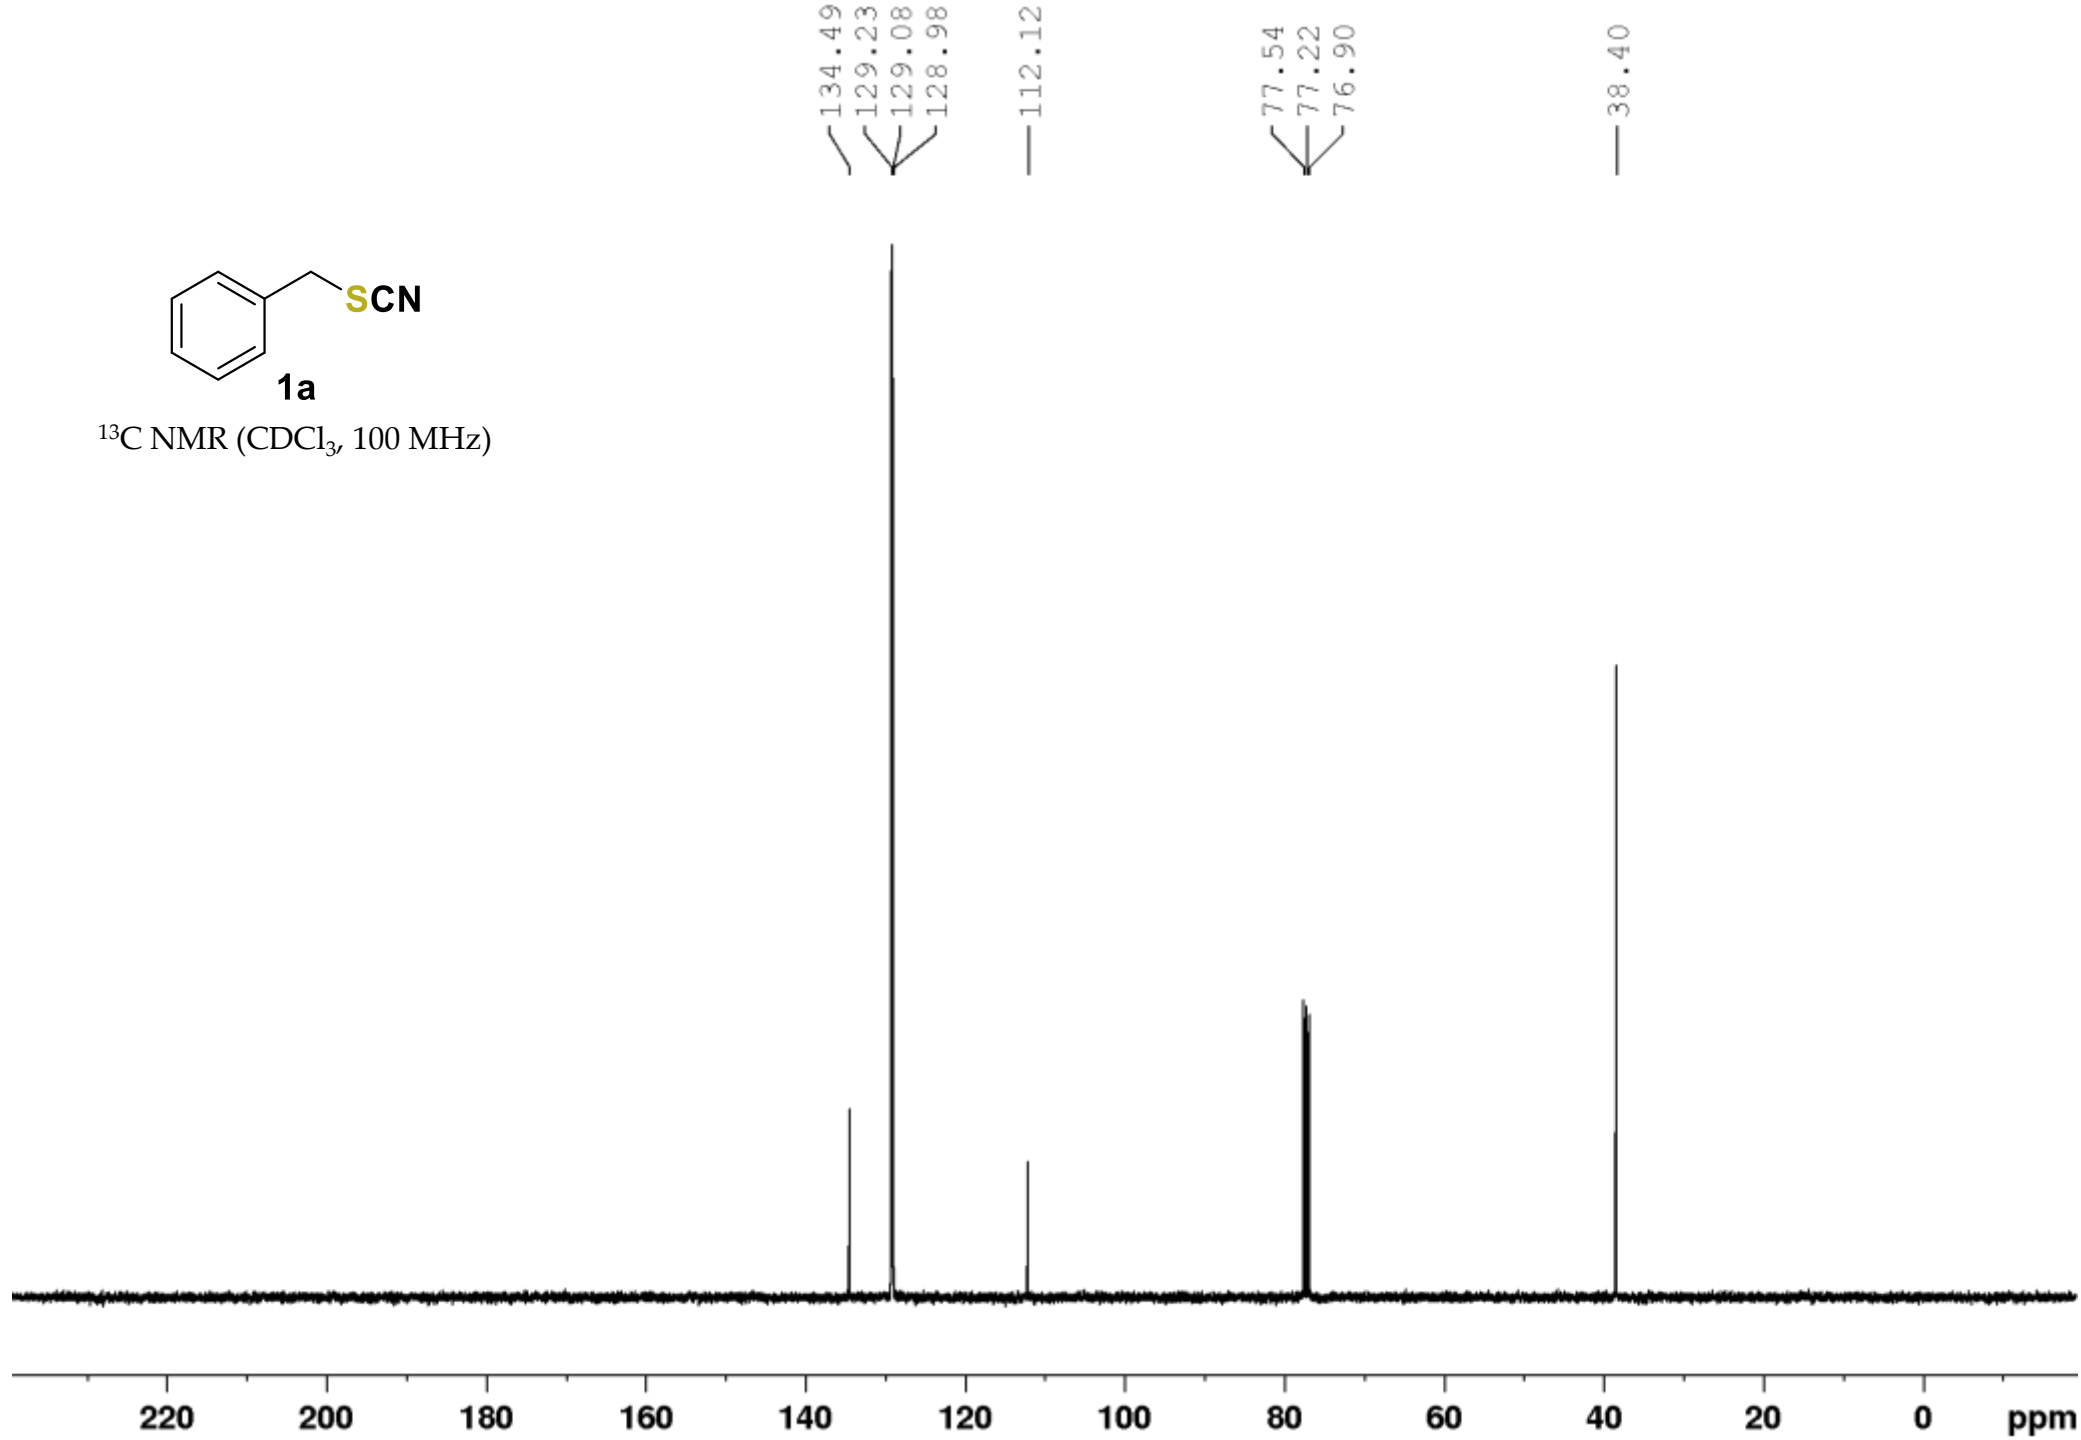

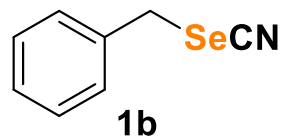

$^1\text{H}$  NMR ( $\text{CDCl}_3$ , 400 MHz)

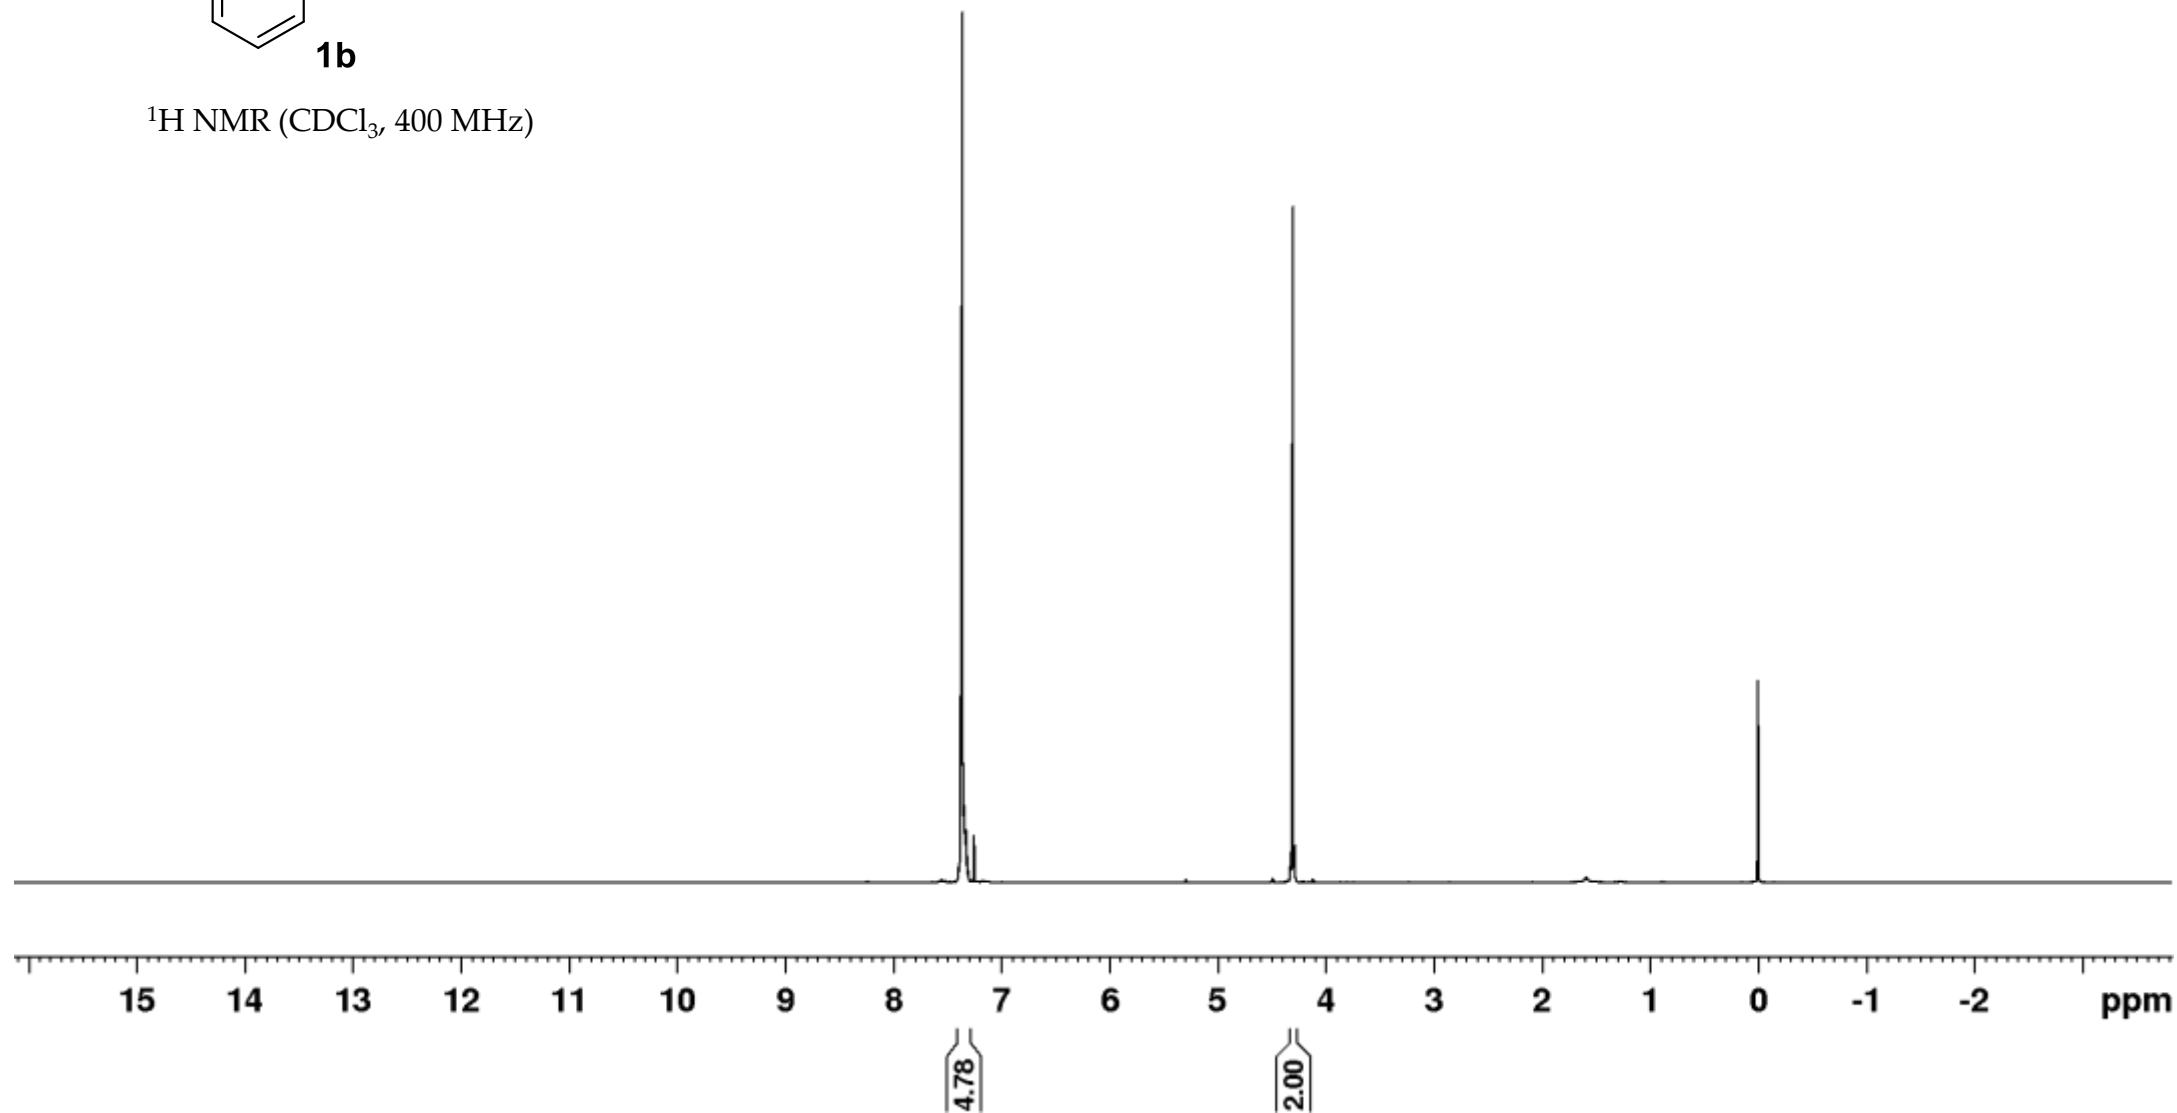



$^{13}\text{C}$  NMR ( $\text{CDCl}_3$ , 100 MHz)

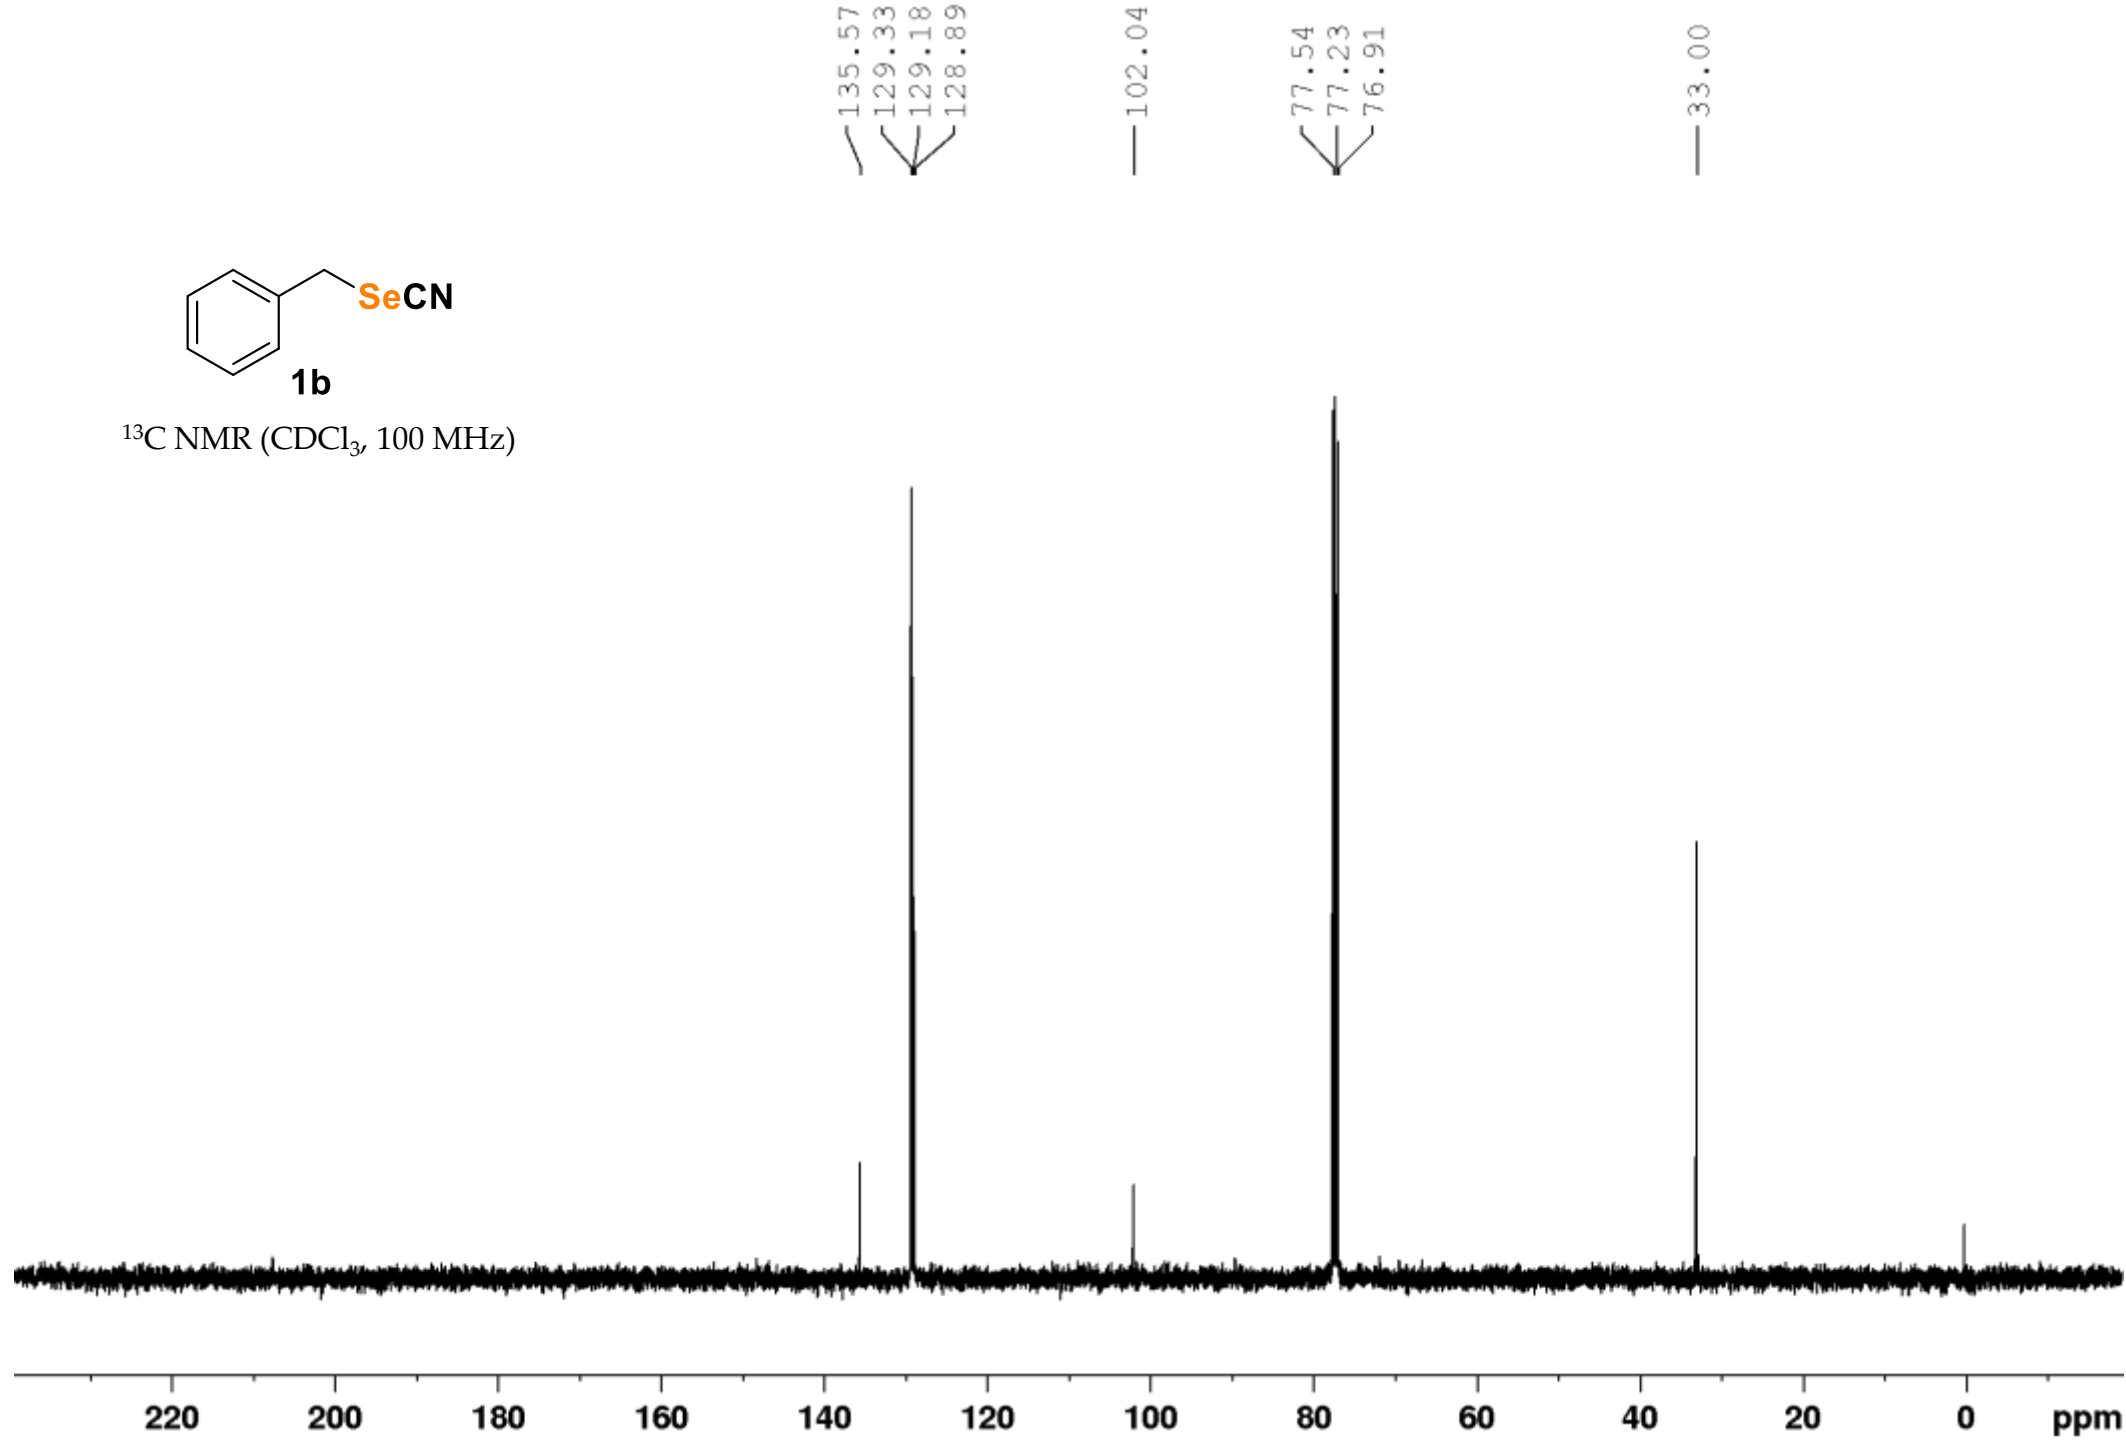

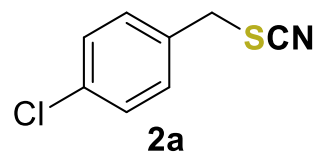

$^1\text{H}$  NMR ( $\text{CDCl}_3$ , 400 MHz)

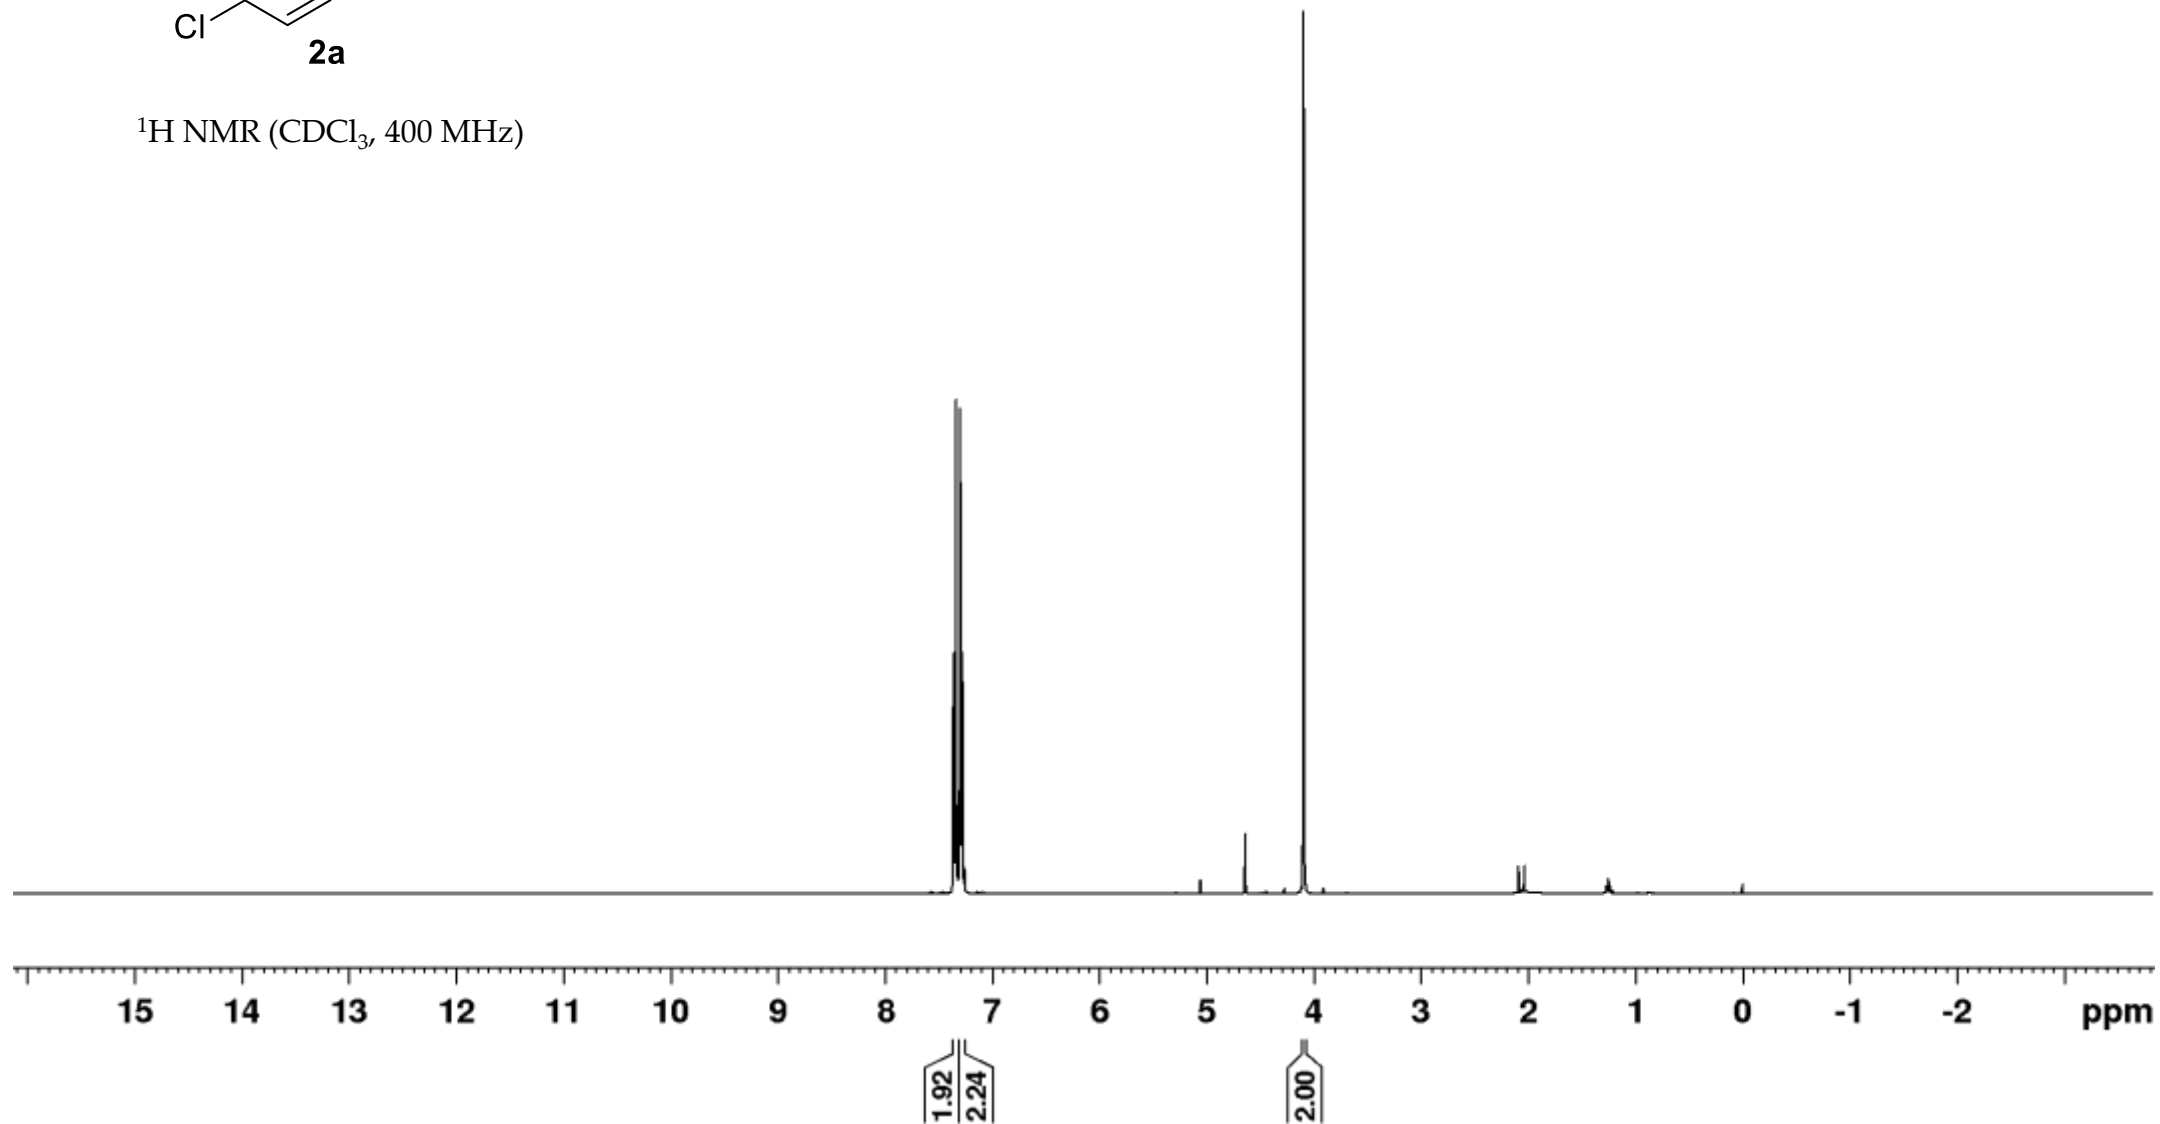





$^{13}\text{C}$  NMR ( $\text{CDCl}_3$ , 100 MHz)

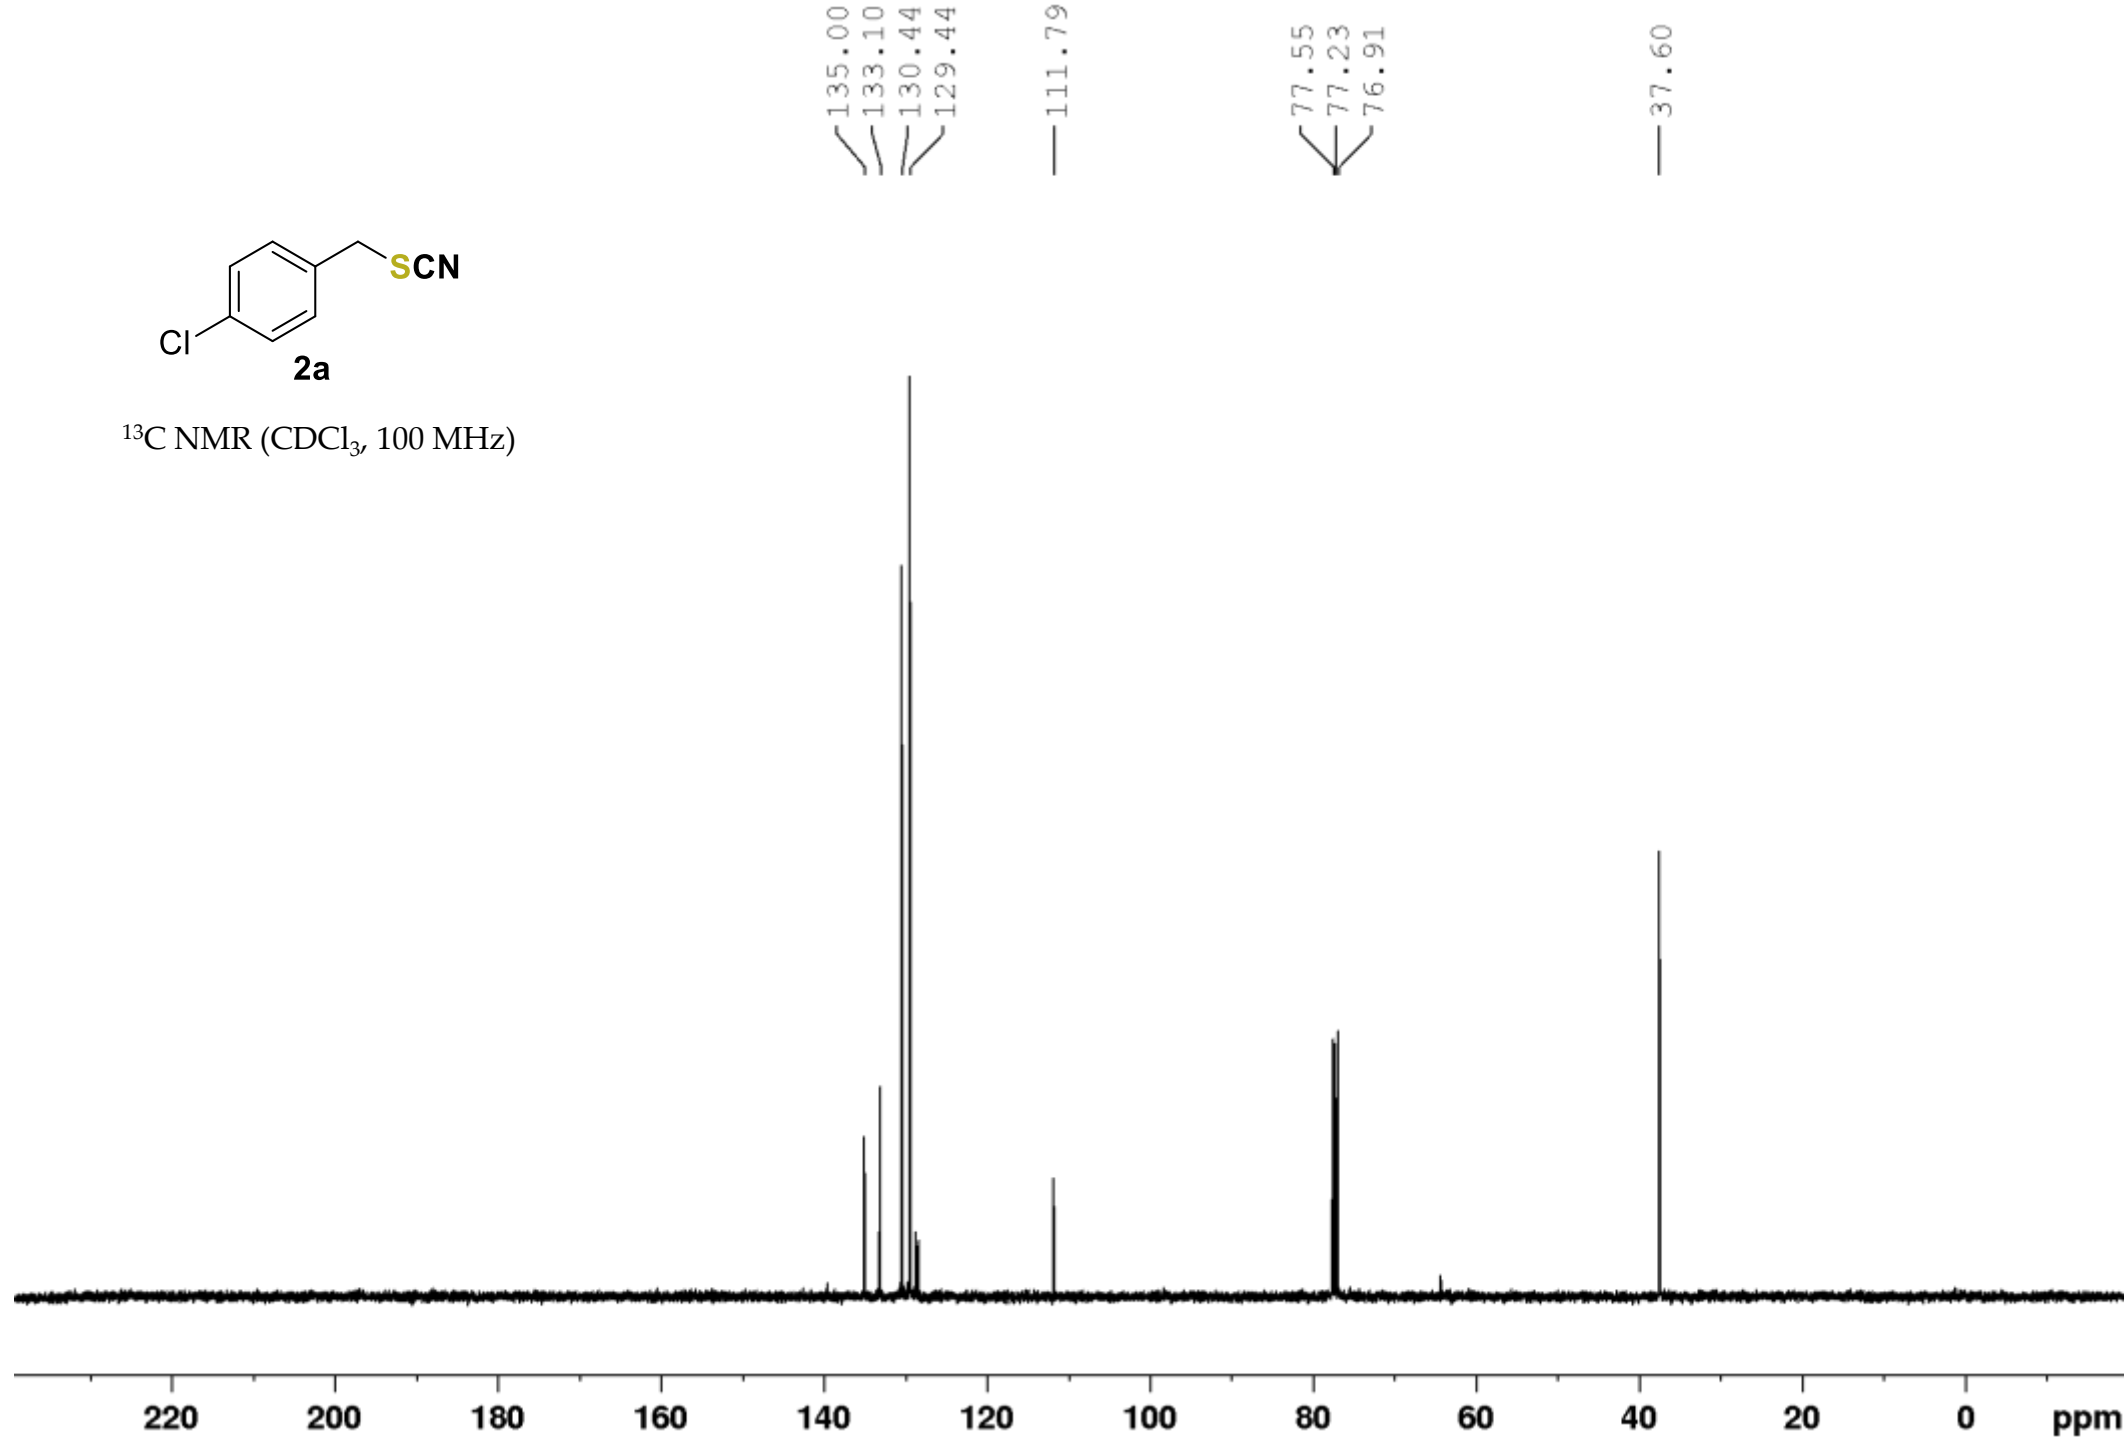

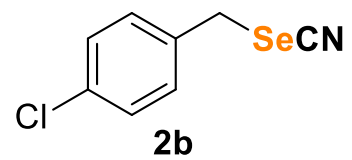

$^1\text{H}$  NMR ( $\text{CDCl}_3$ , 400 MHz)

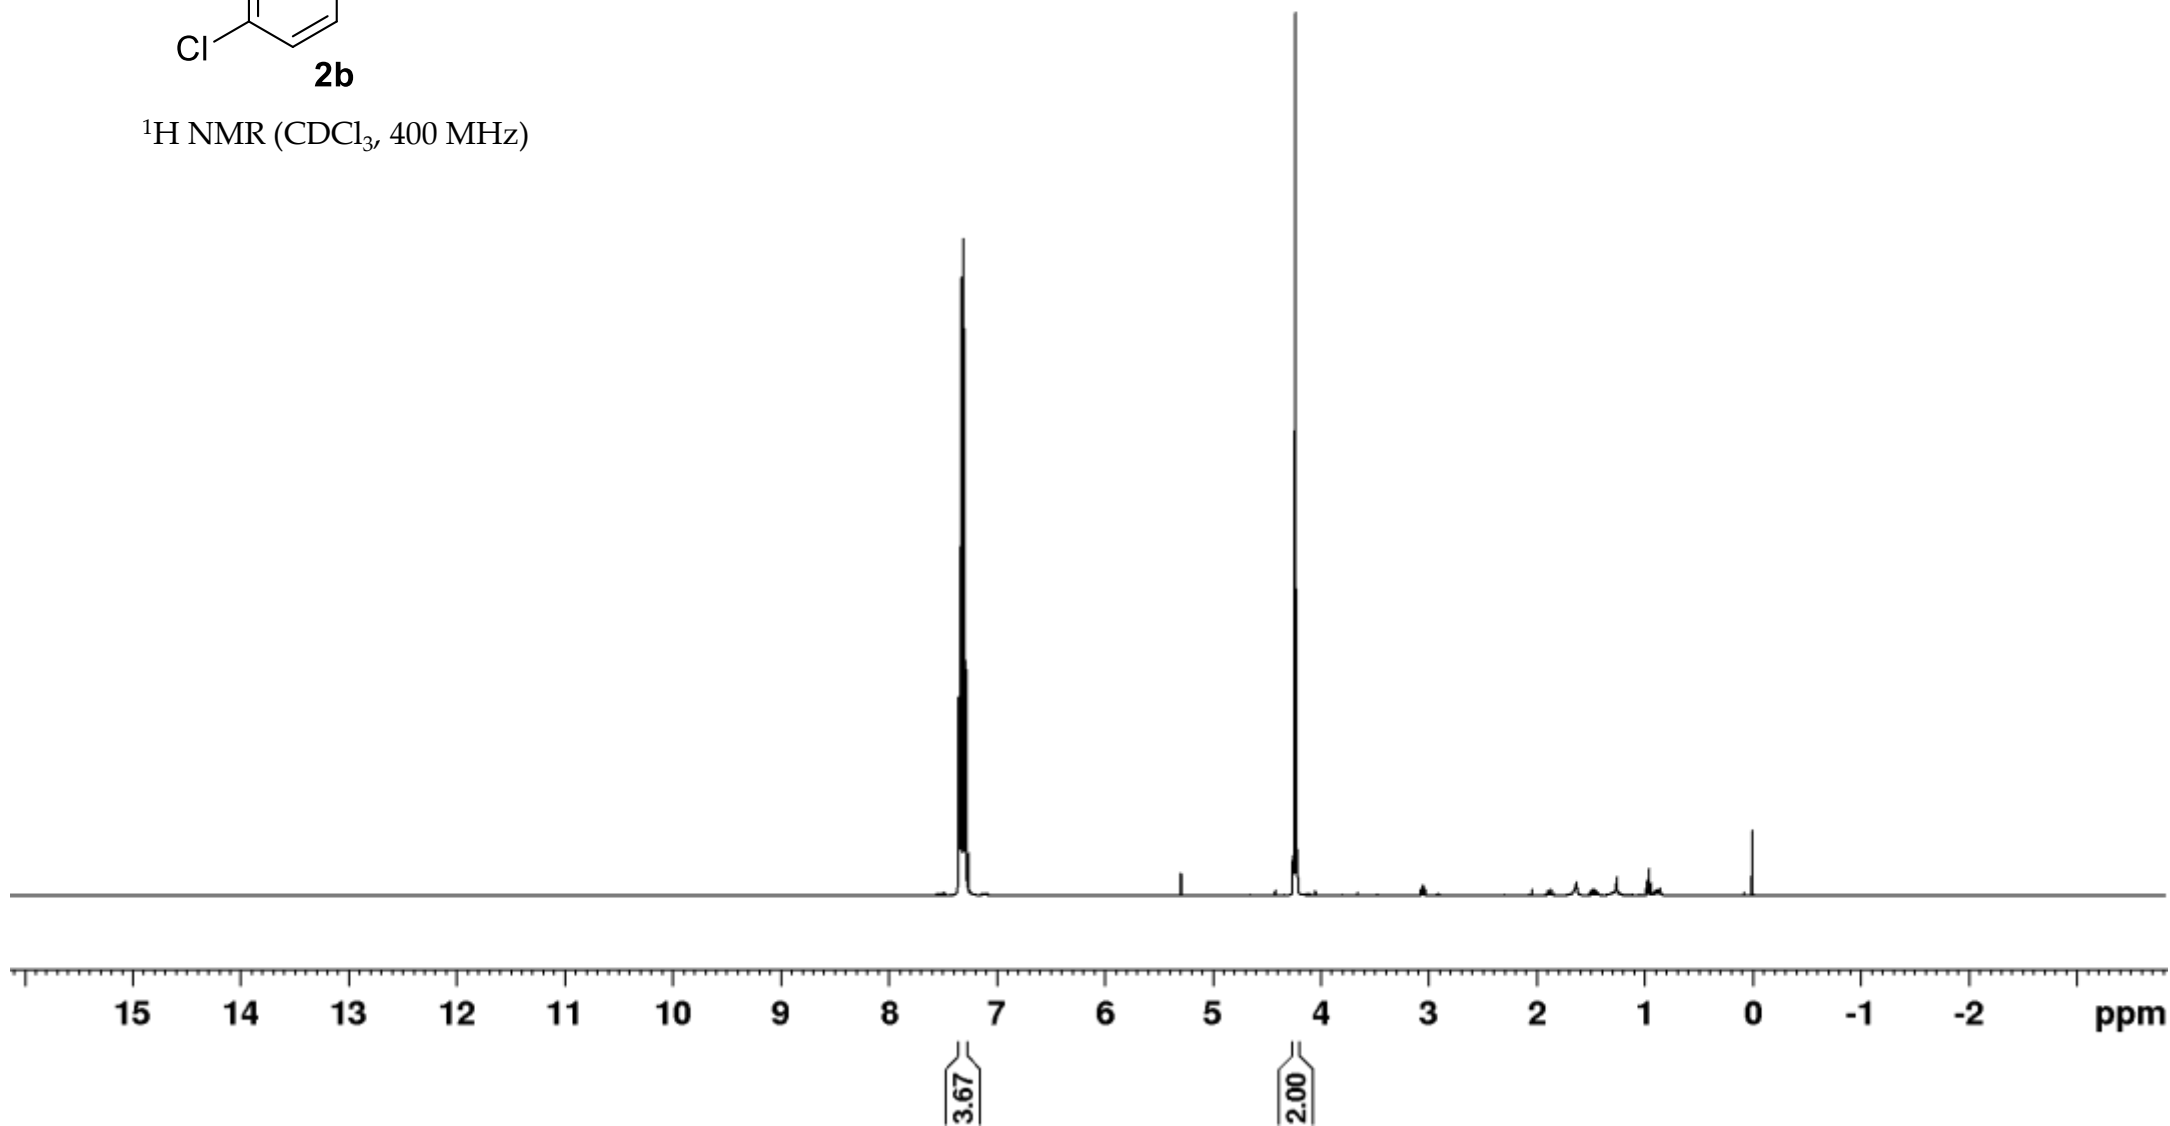

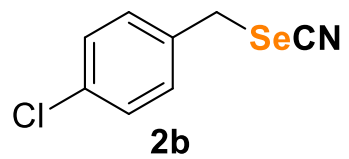

$^{13}\text{C}$  NMR ( $\text{CDCl}_3$ , 100 MHz)

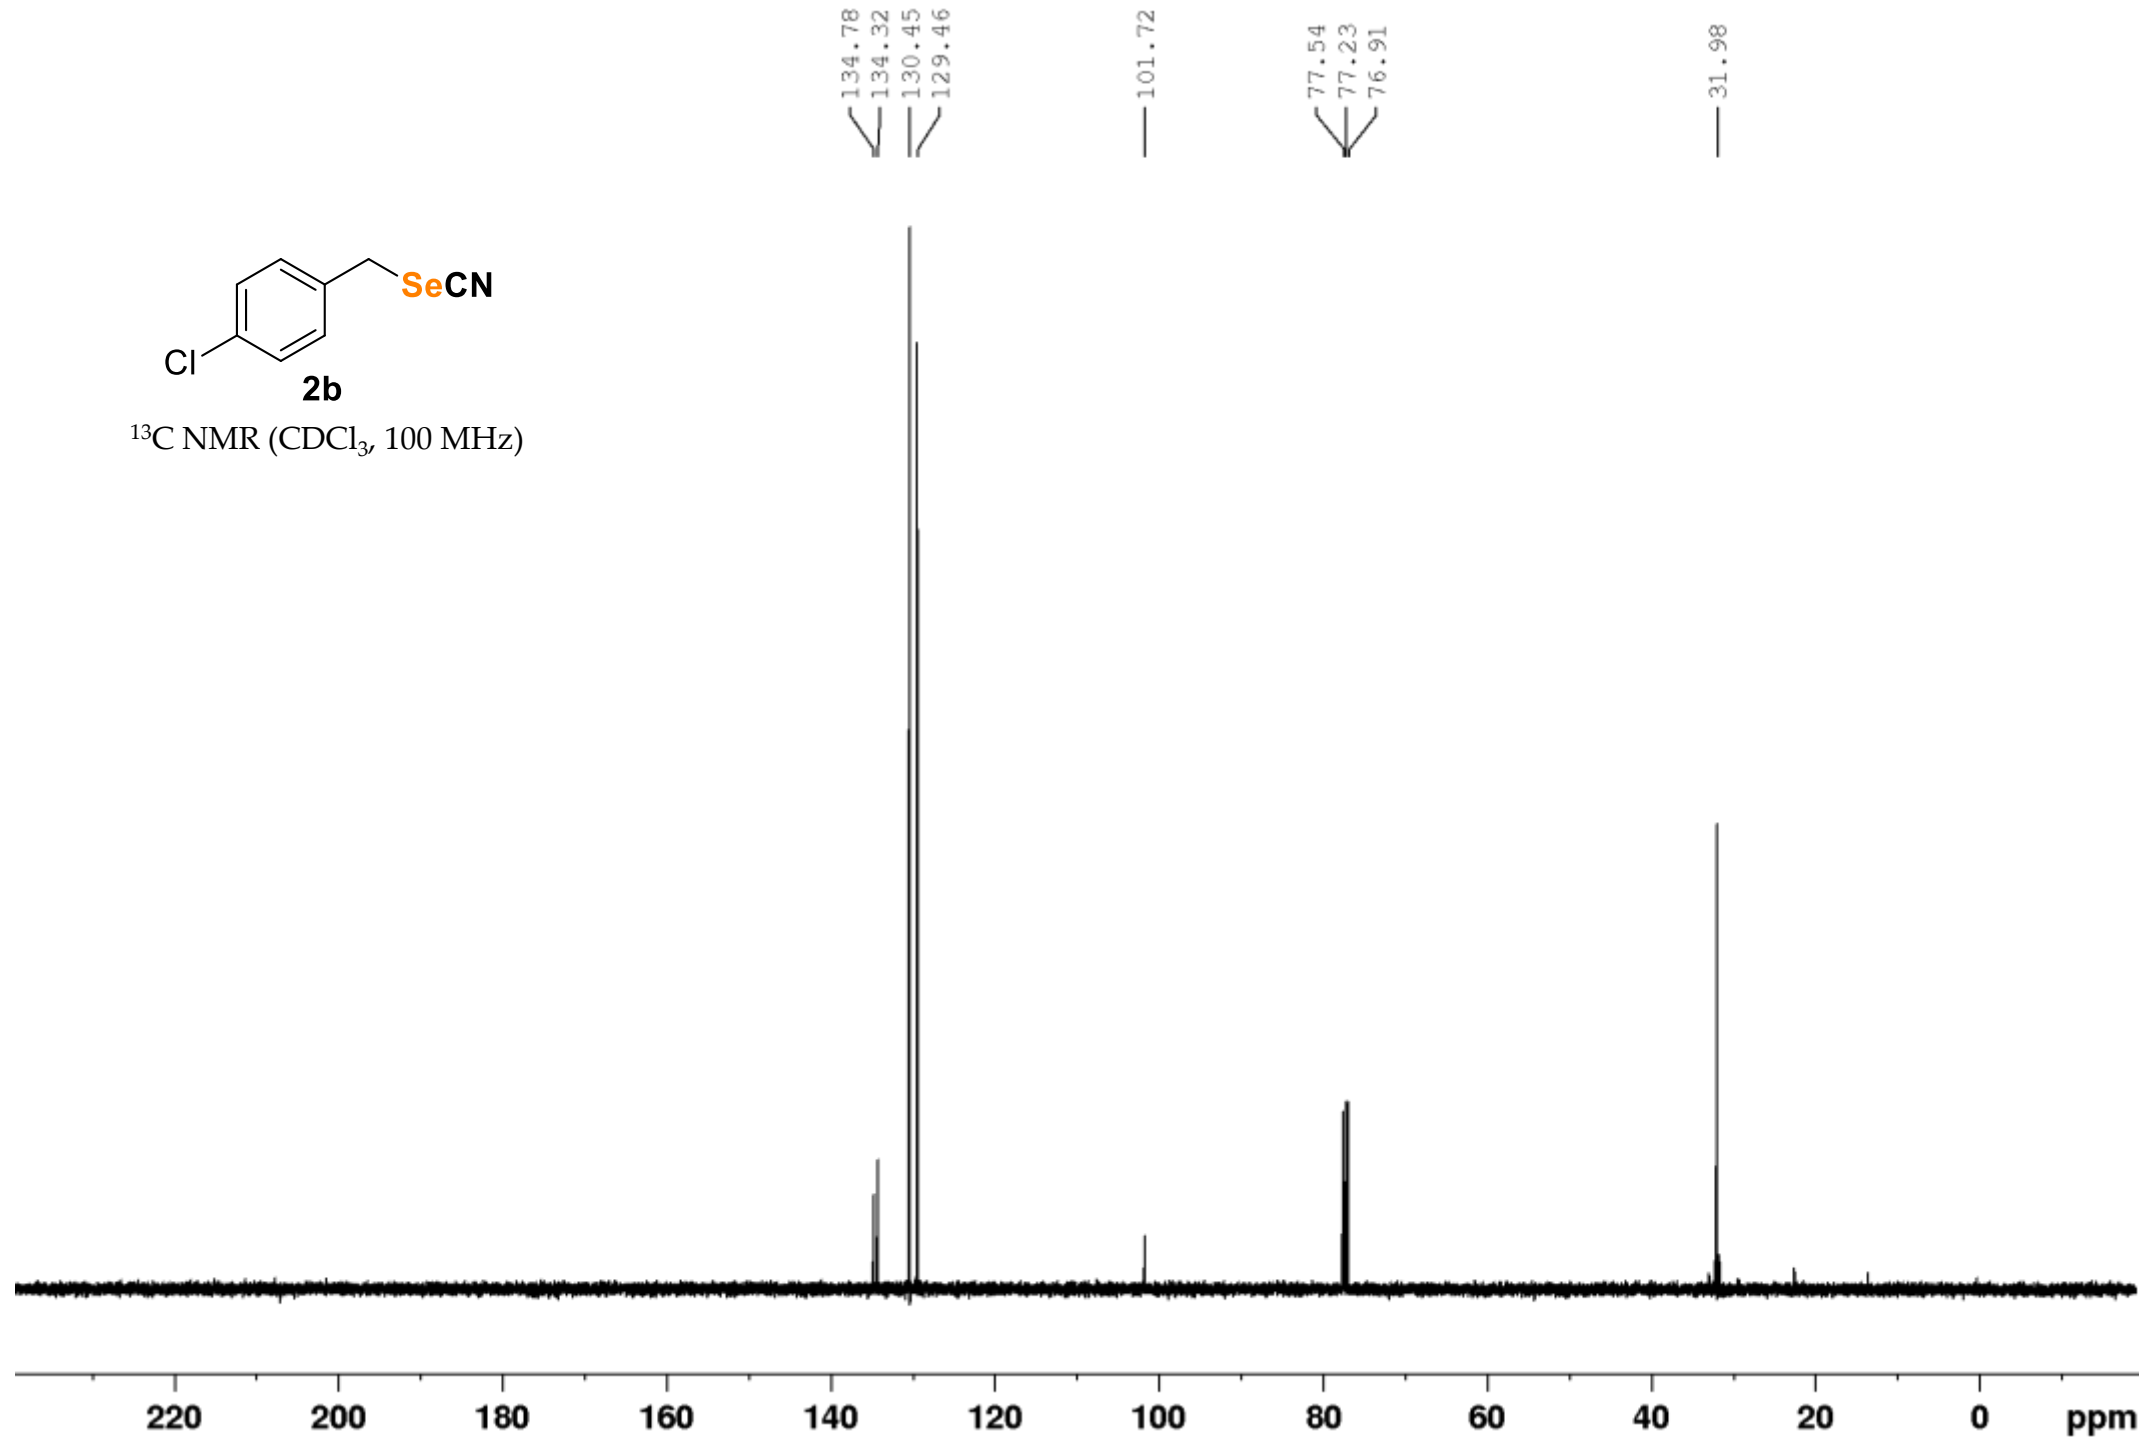

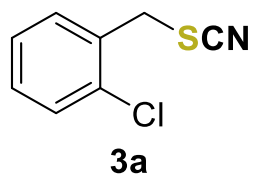

$^1\text{H}$  NMR ( $\text{CDCl}_3$ , 400 MHz)

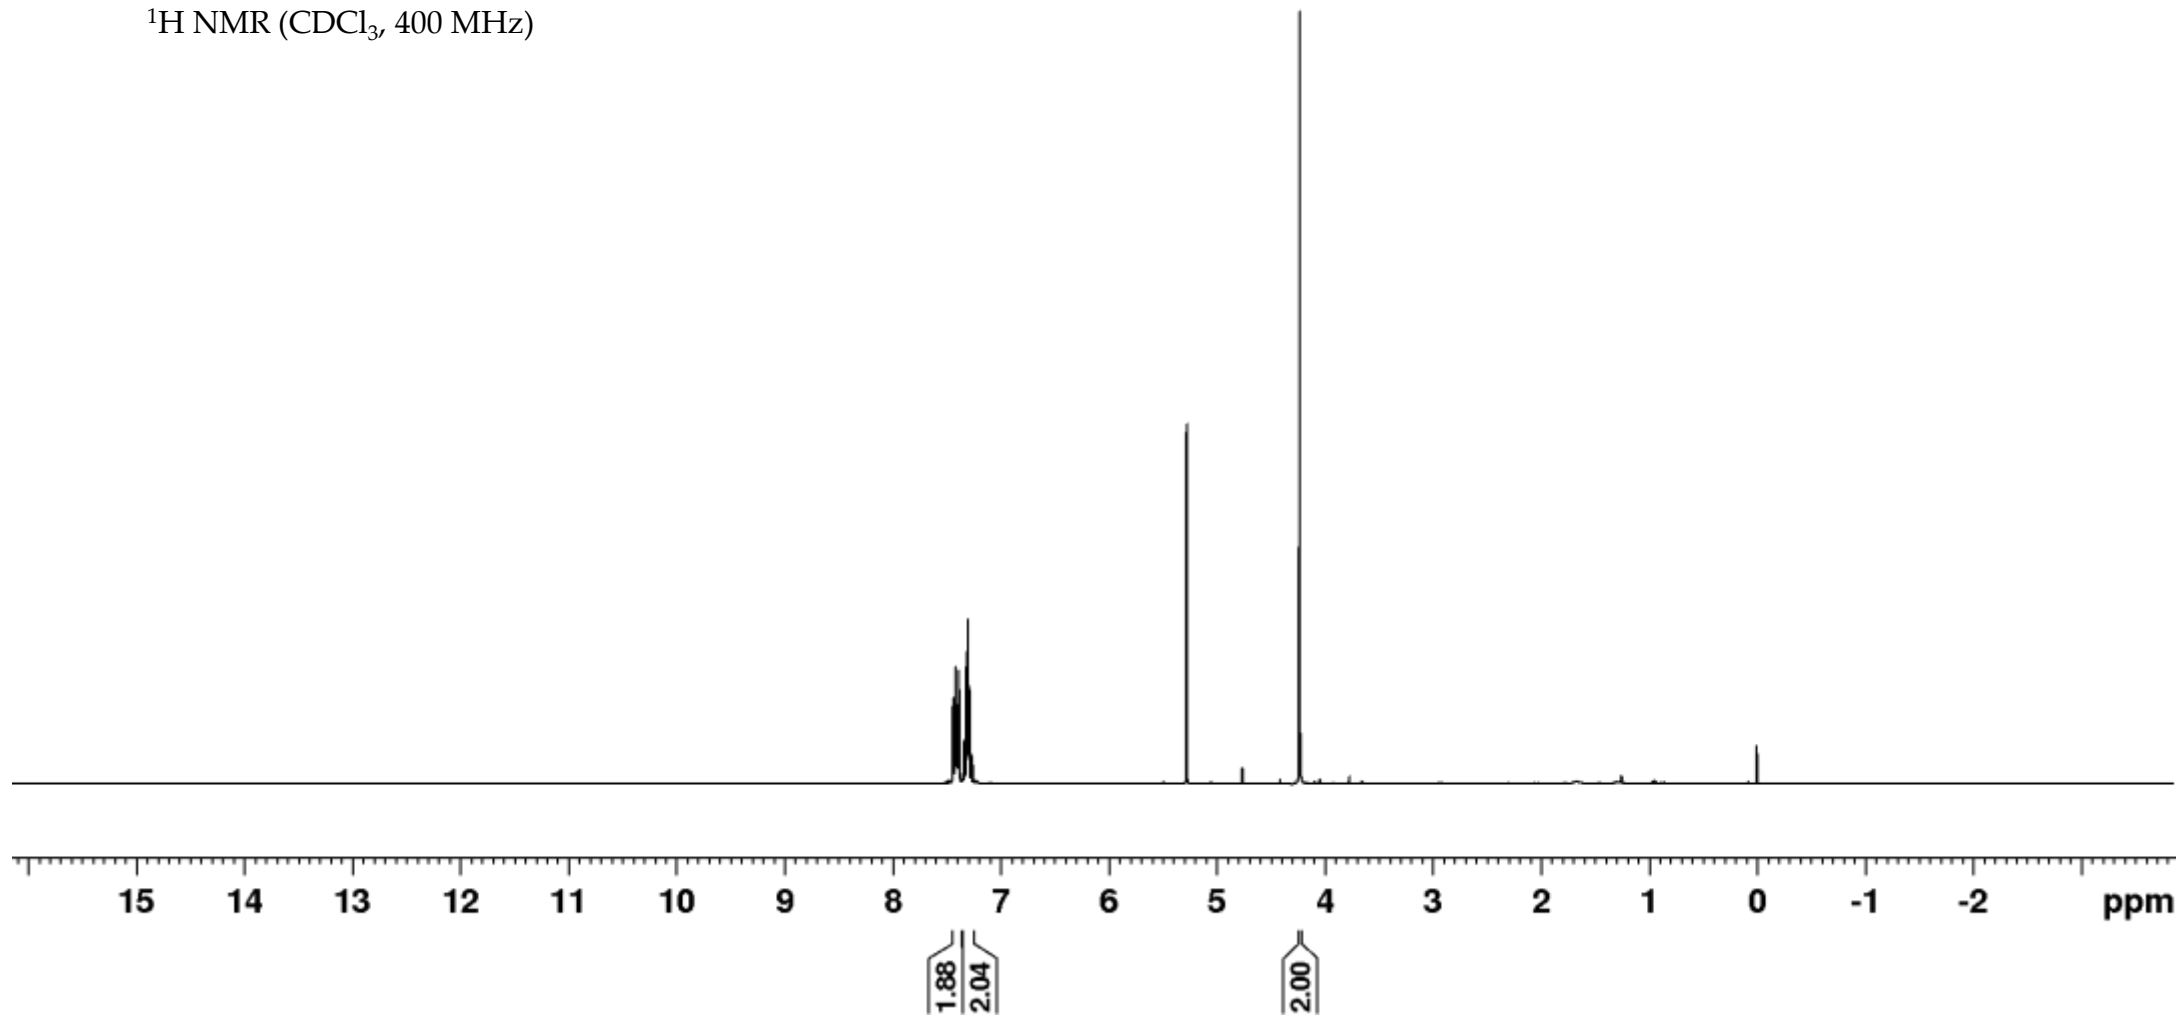

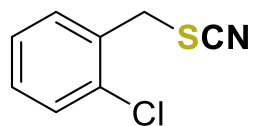

**3a**

$^{13}\text{C}$  NMR ( $\text{CDCl}_3$ , 100 MHz)

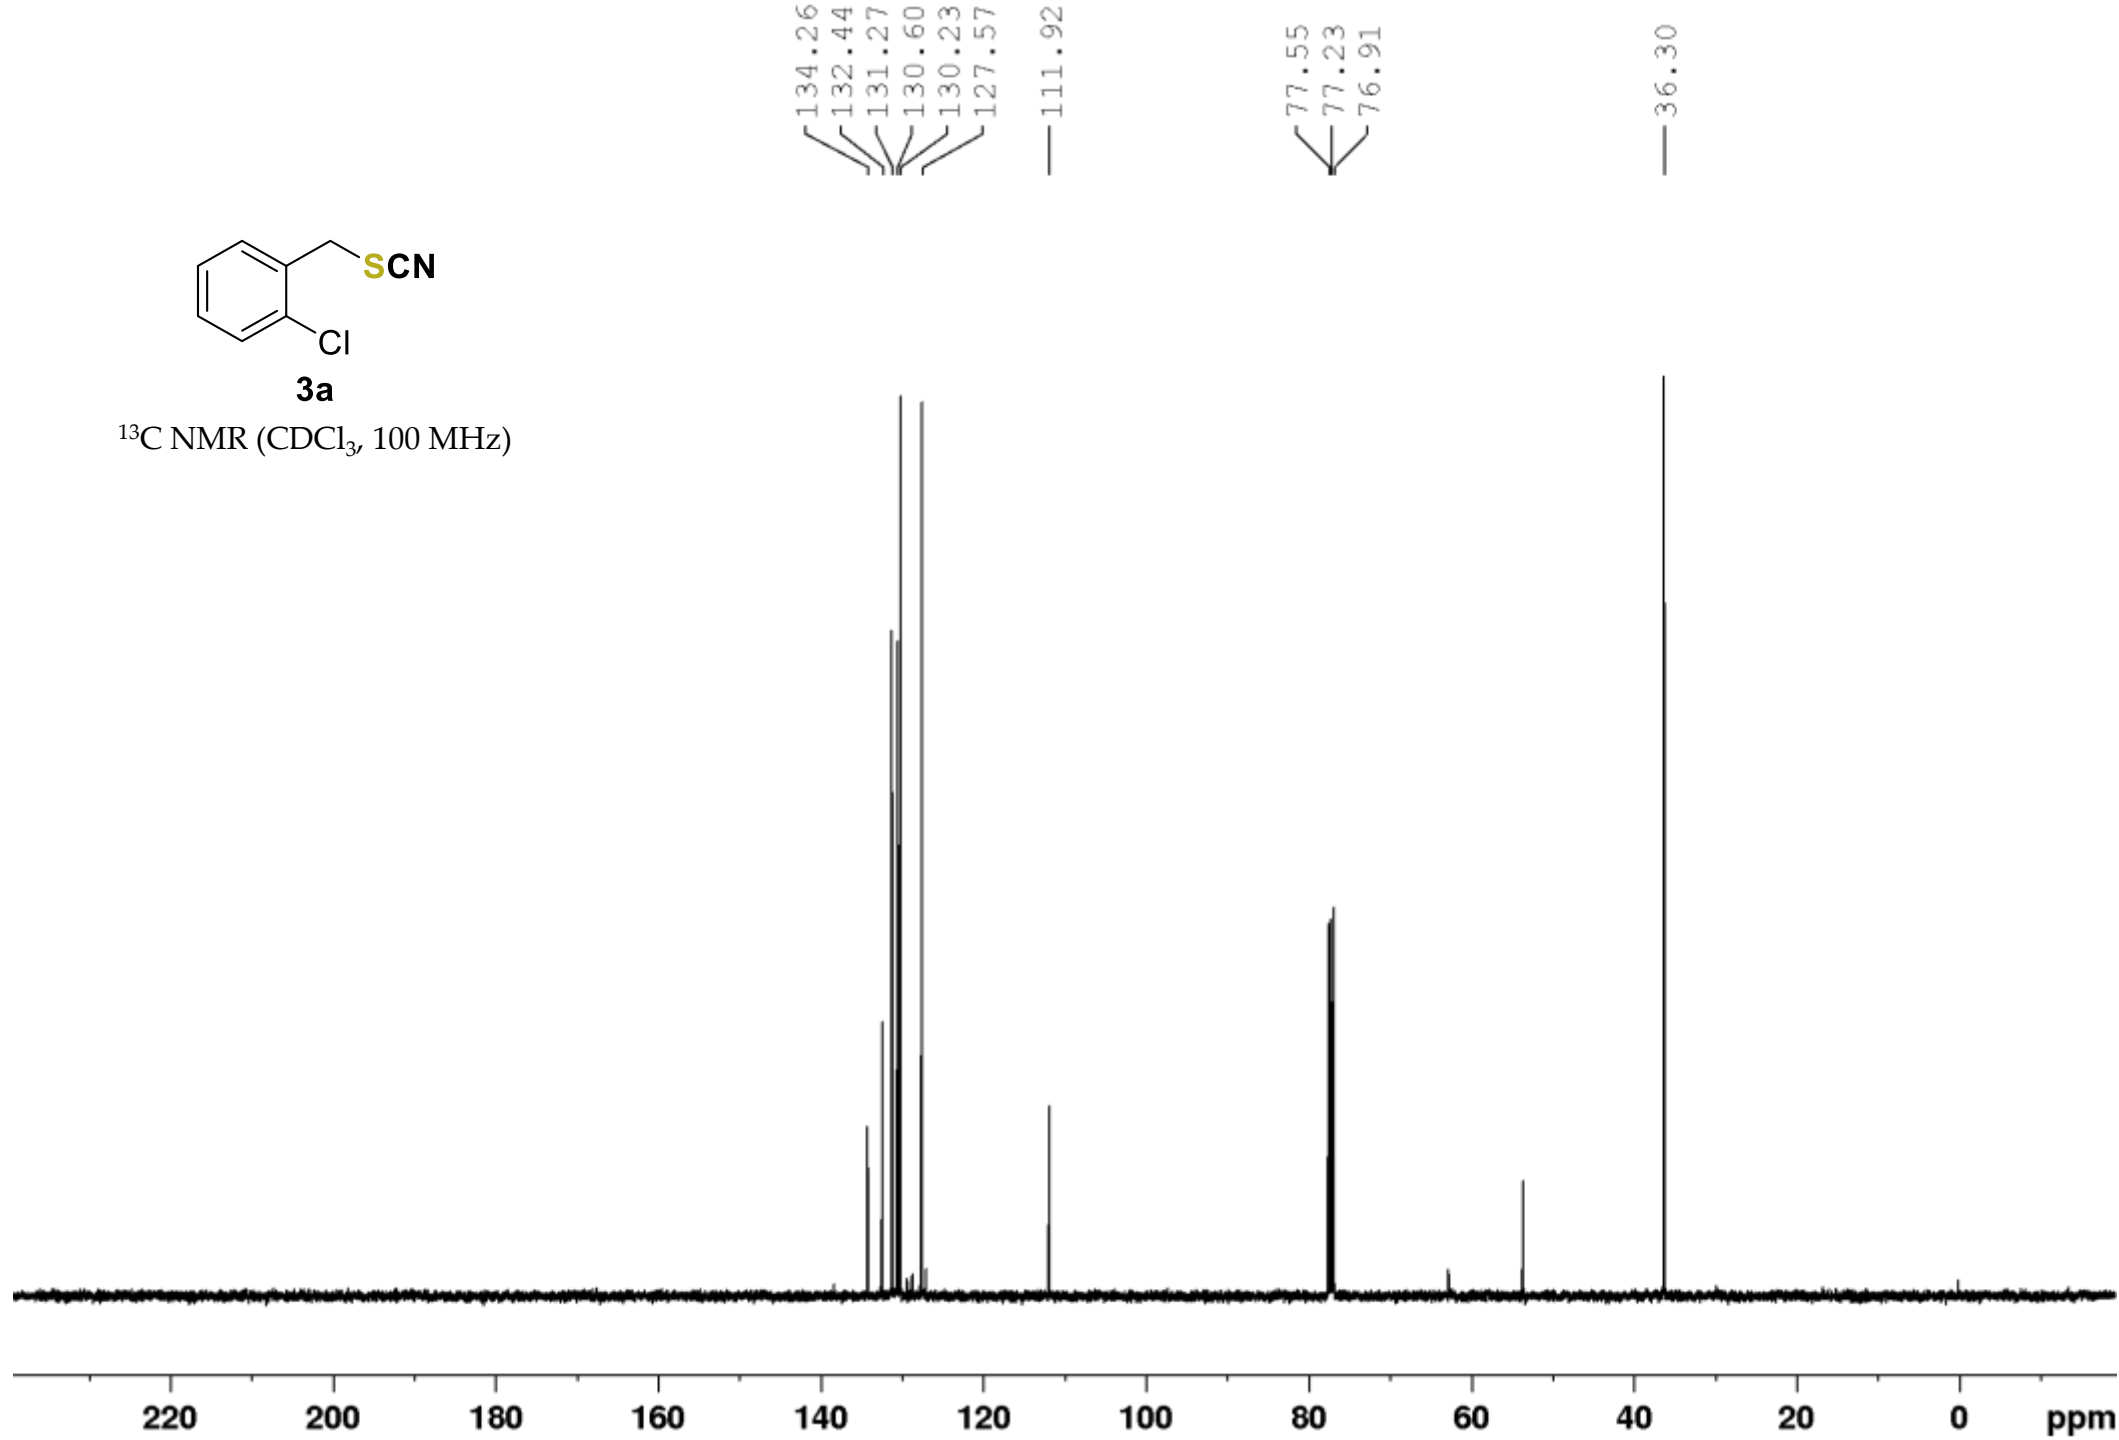

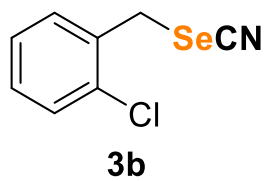

$^1\text{H}$  NMR ( $\text{CDCl}_3$ , 400 MHz)

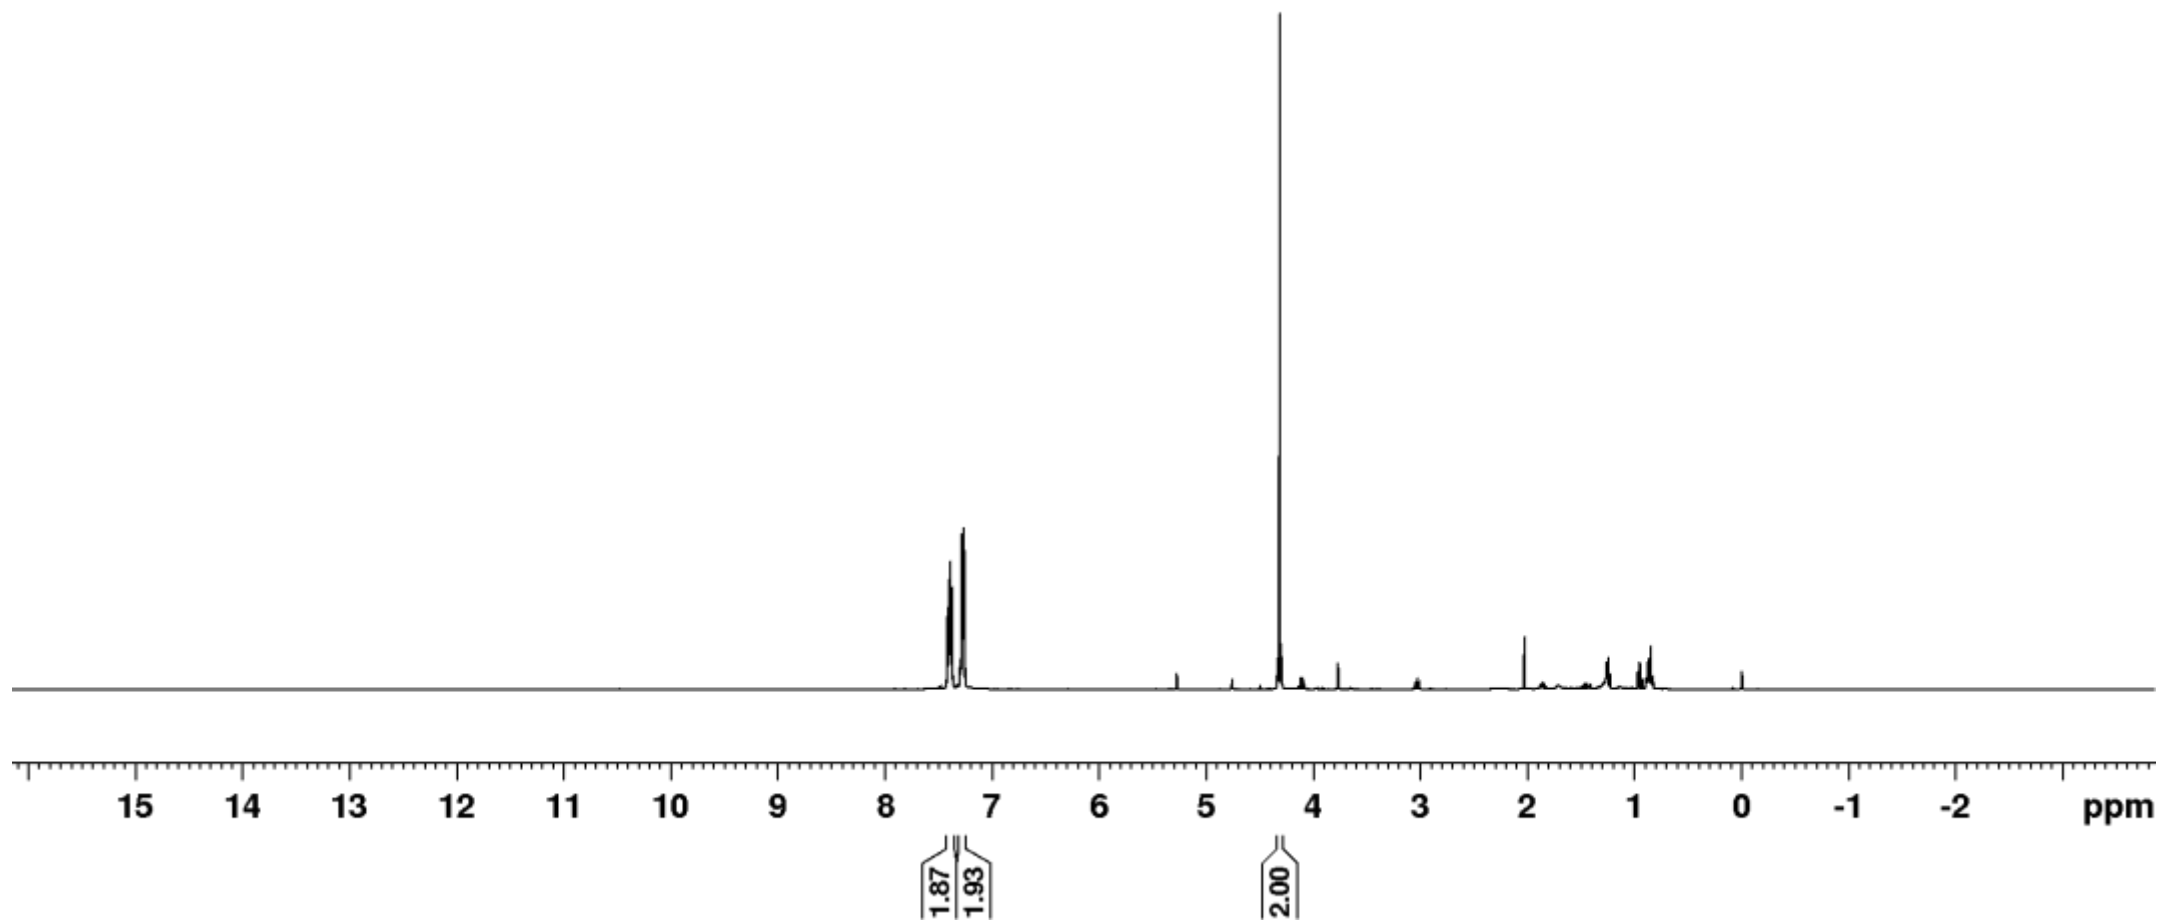

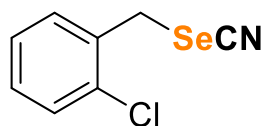

**3b**

$^{13}\text{C}$  NMR ( $\text{CDCl}_3$ , 100 MHz)

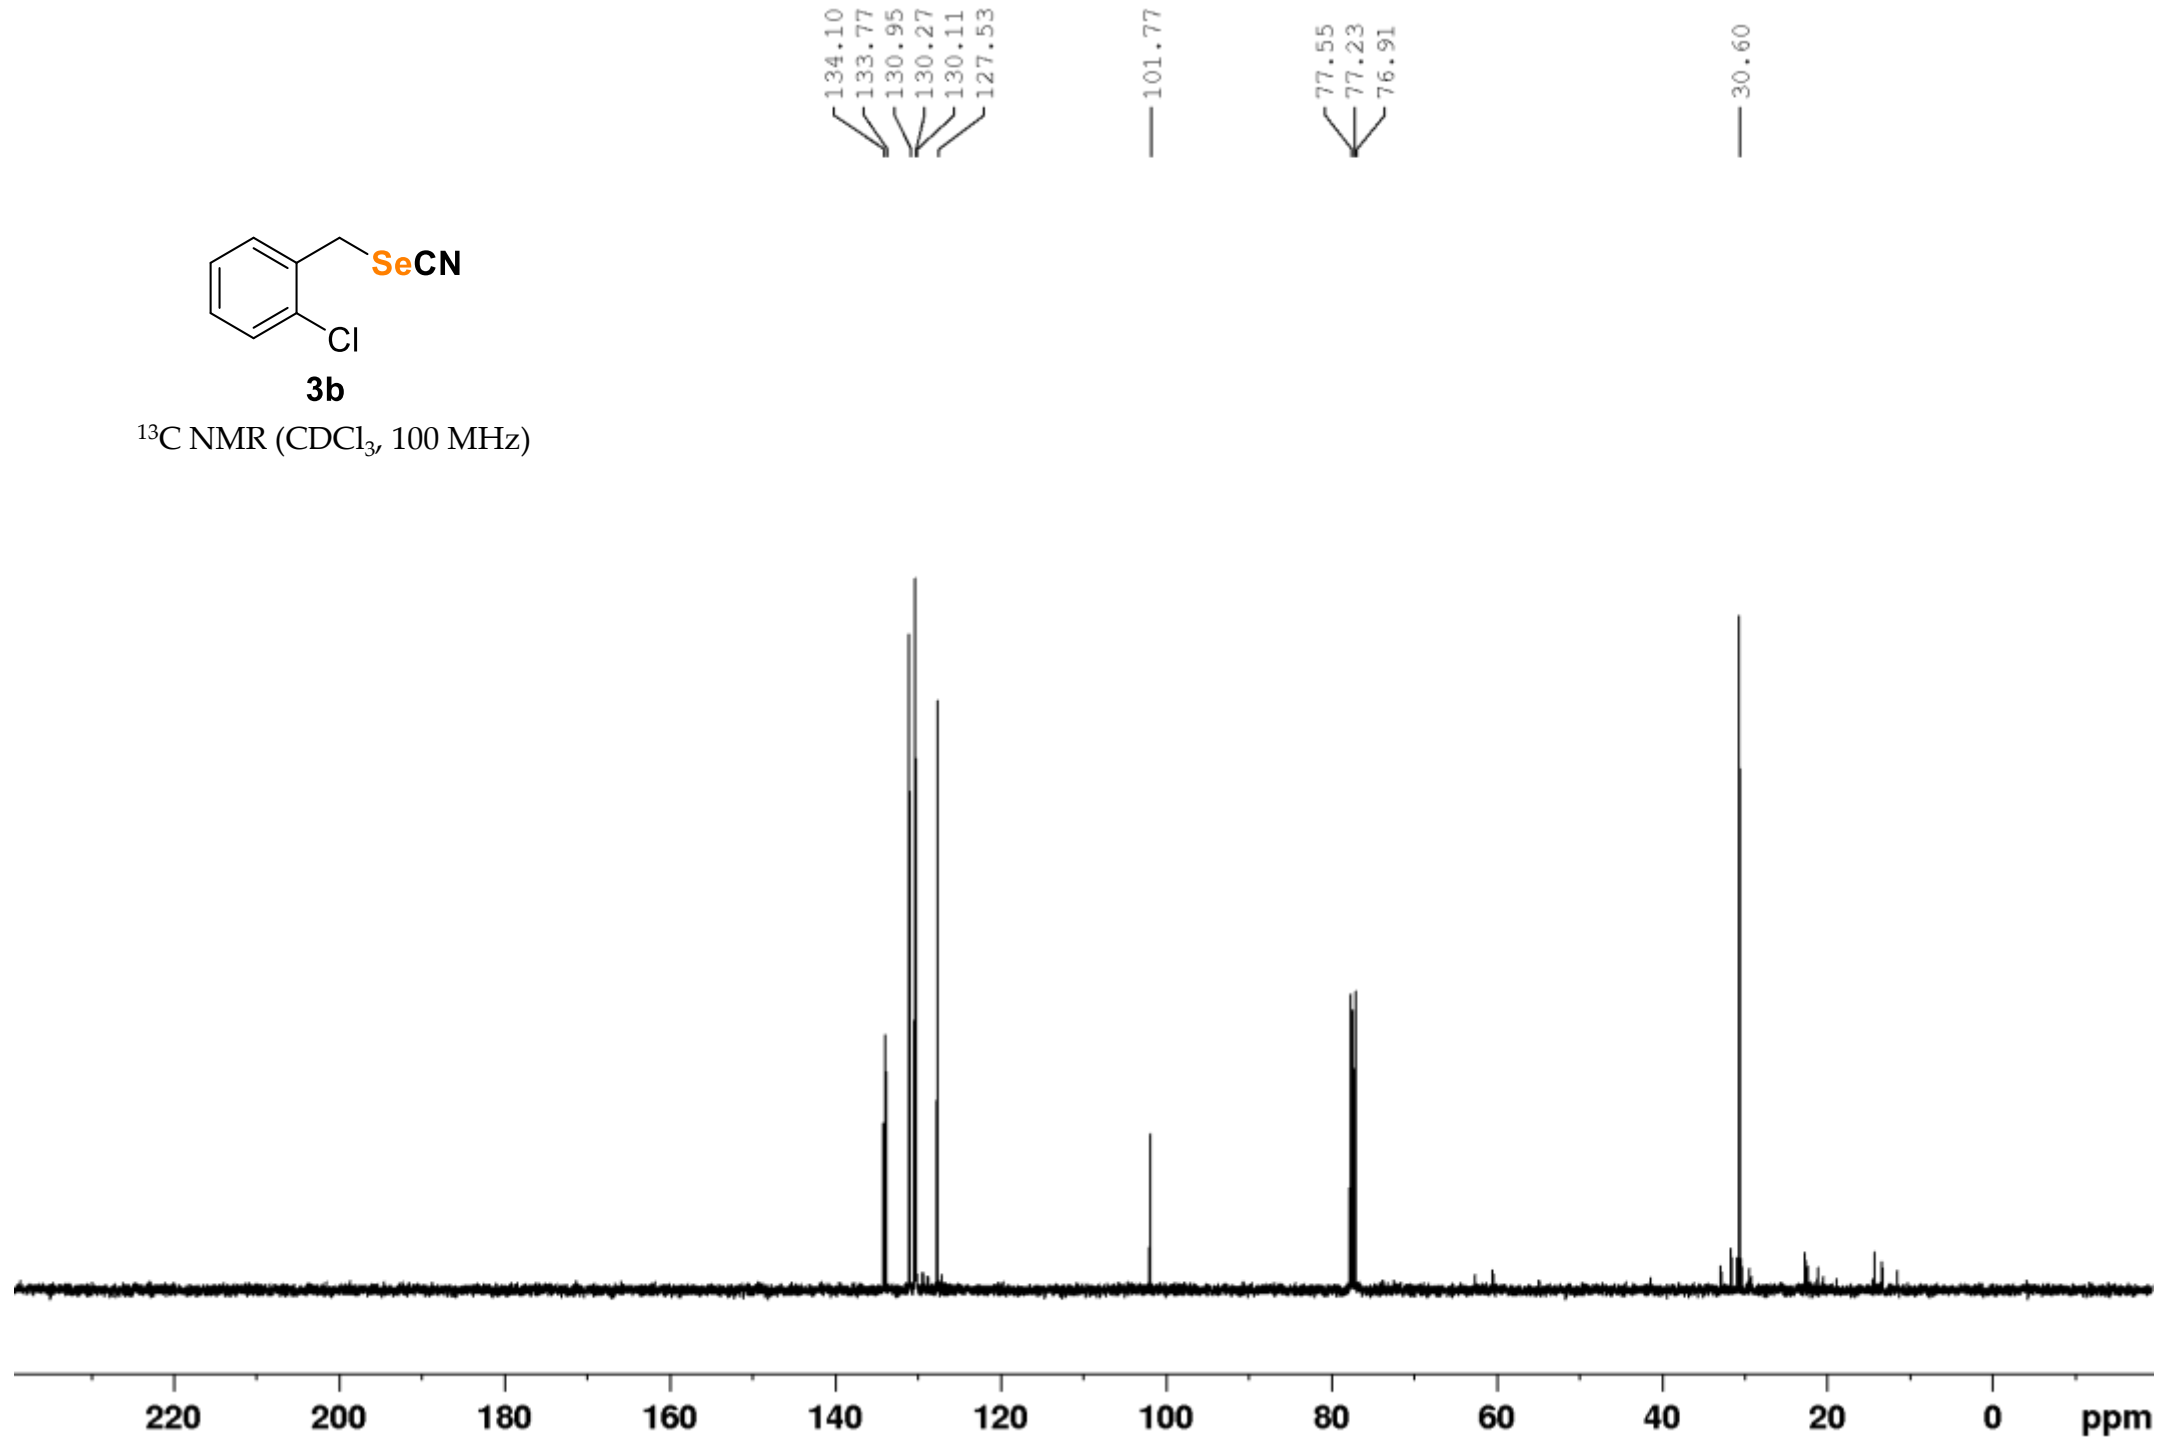

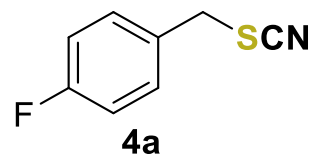

$^1\text{H}$  NMR ( $\text{CDCl}_3$ , 400 MHz)

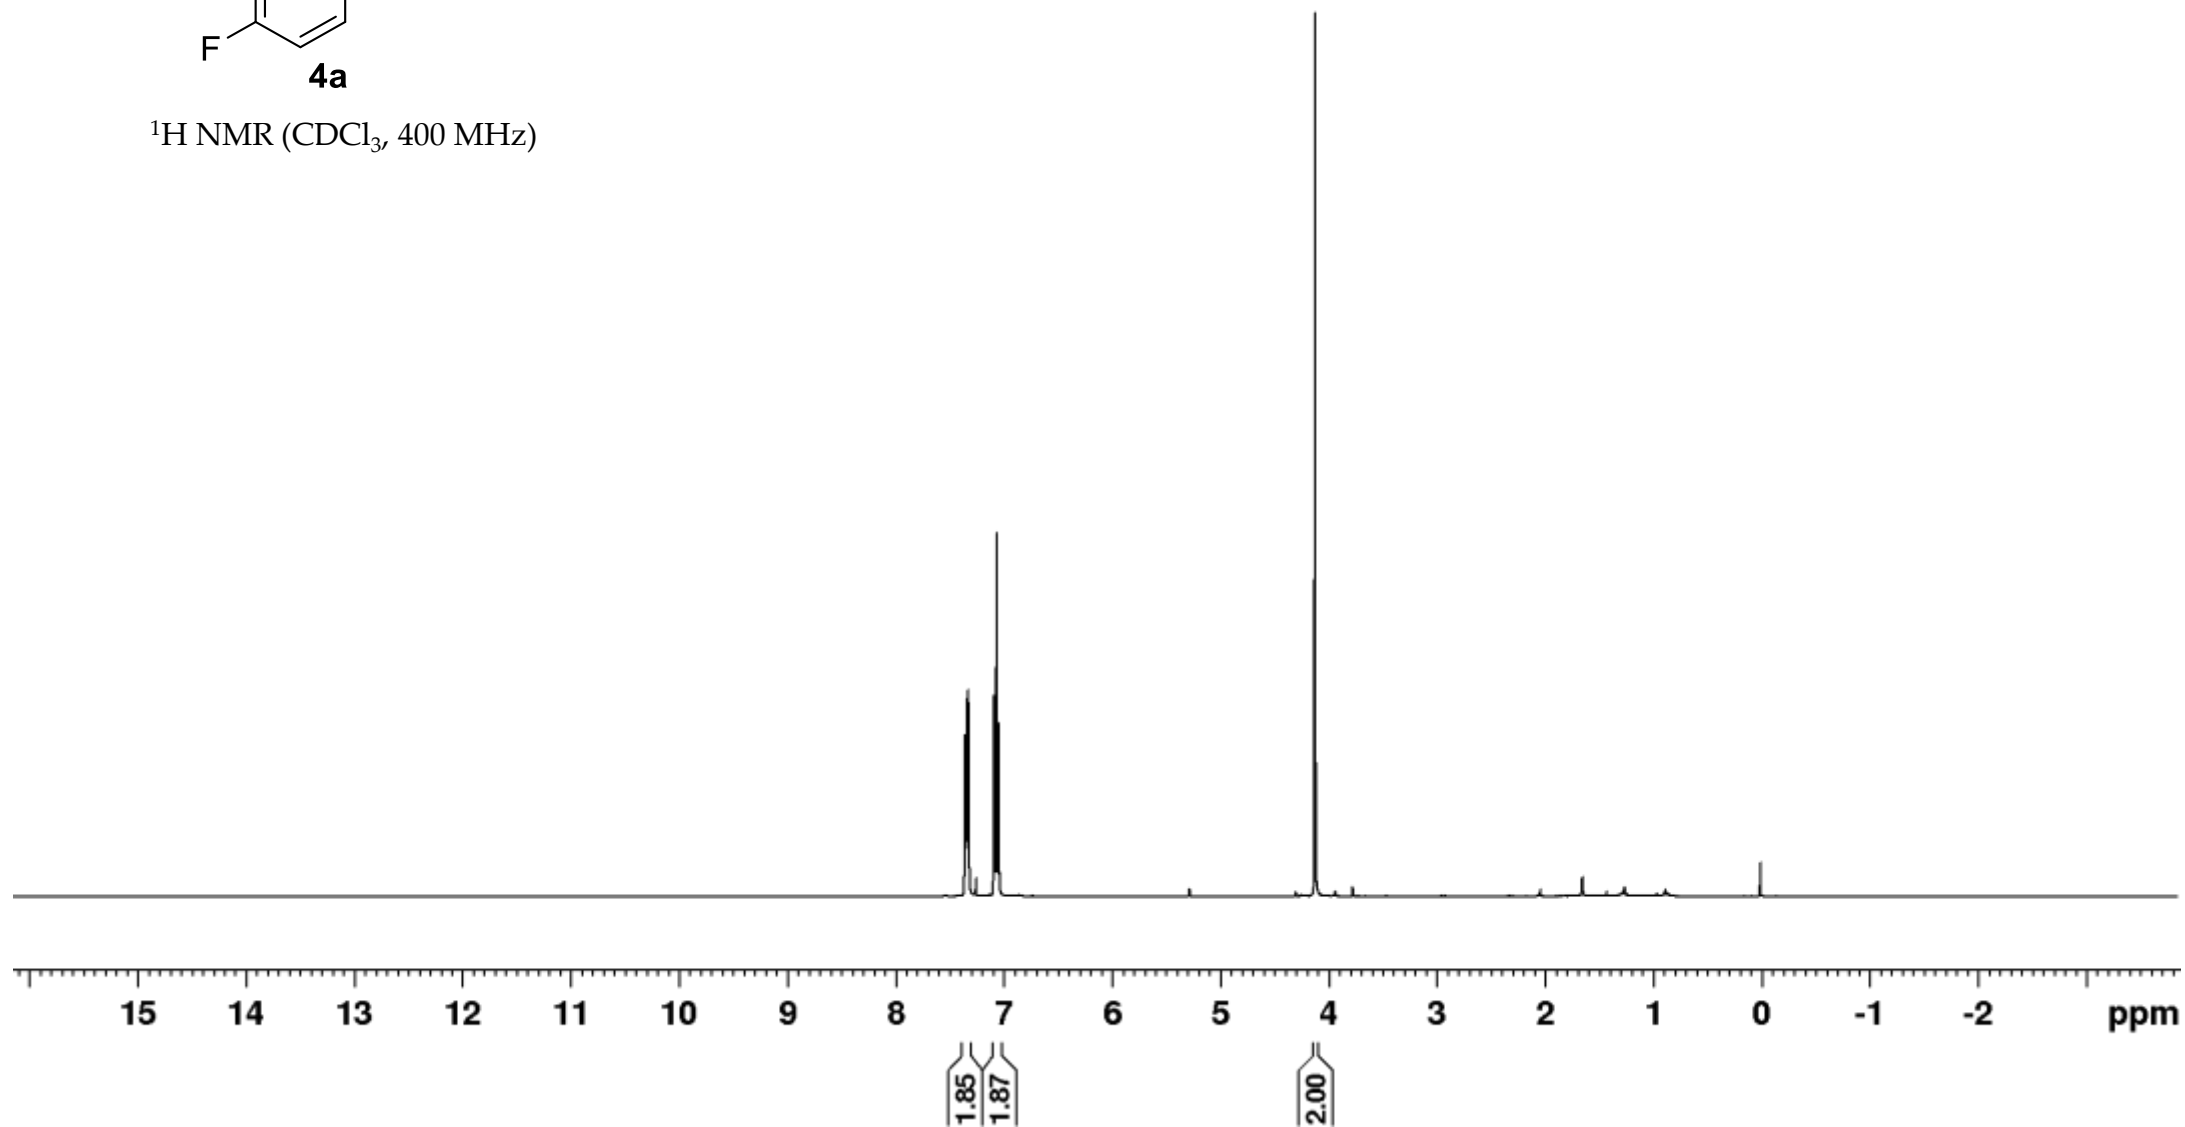



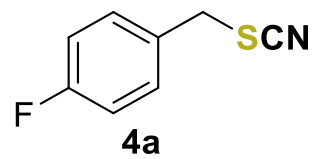

$^{13}\text{C}$  NMR ( $\text{CDCl}_3$ , 100 MHz)

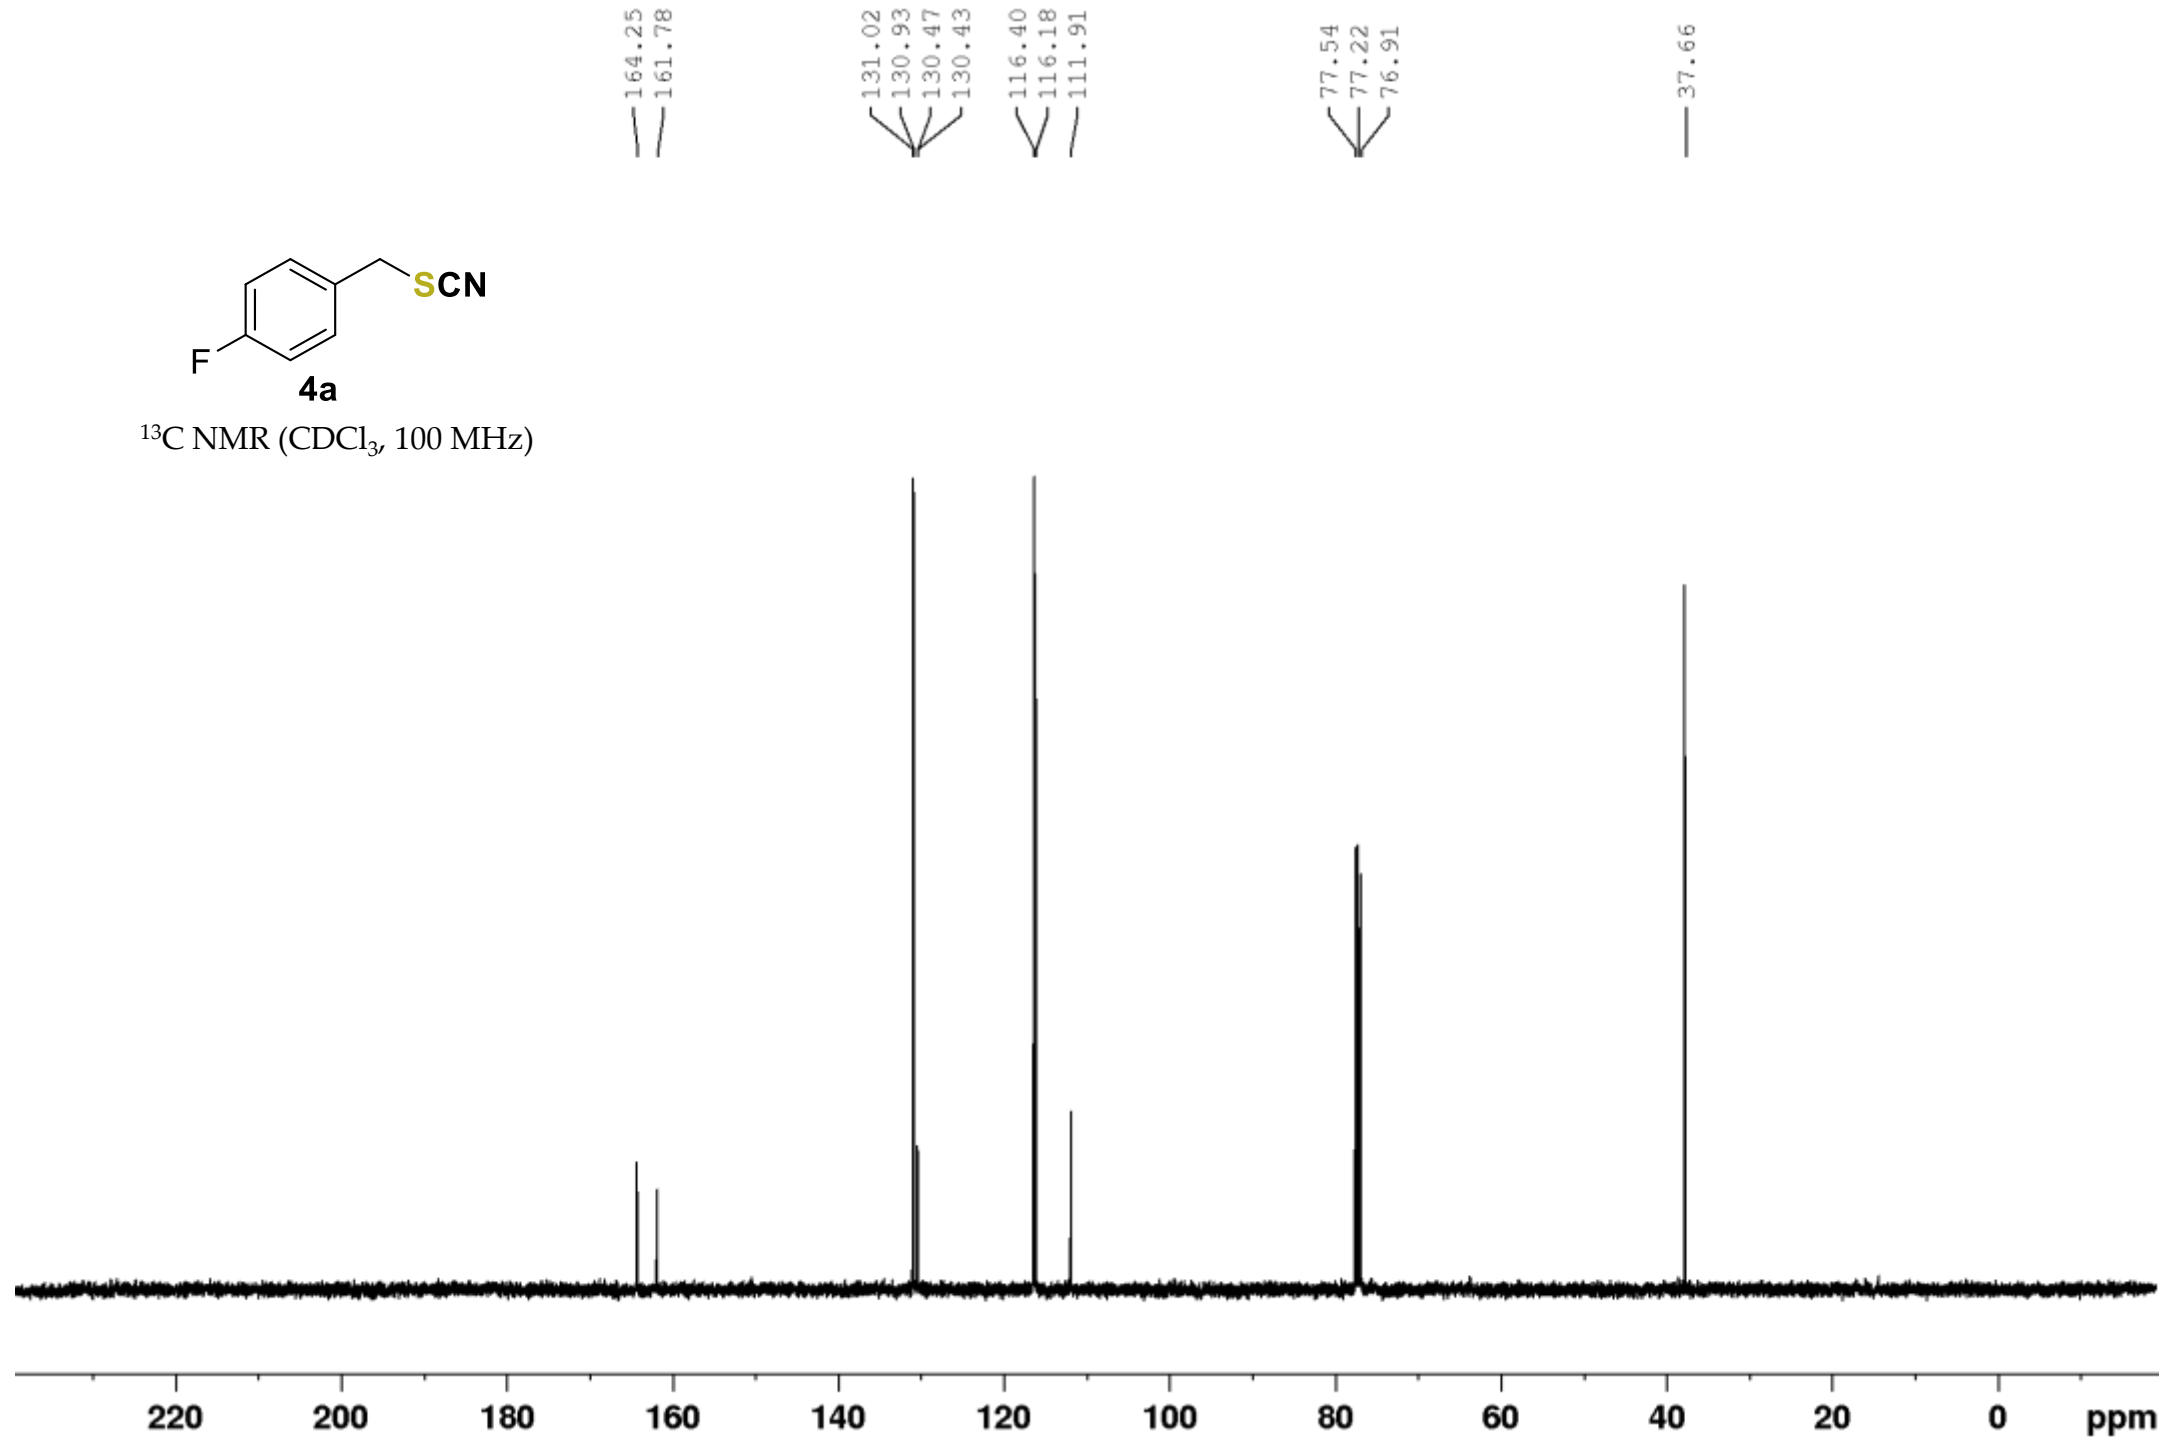

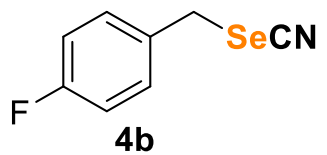

$^1\text{H}$  NMR ( $\text{CDCl}_3$ , 400 MHz)

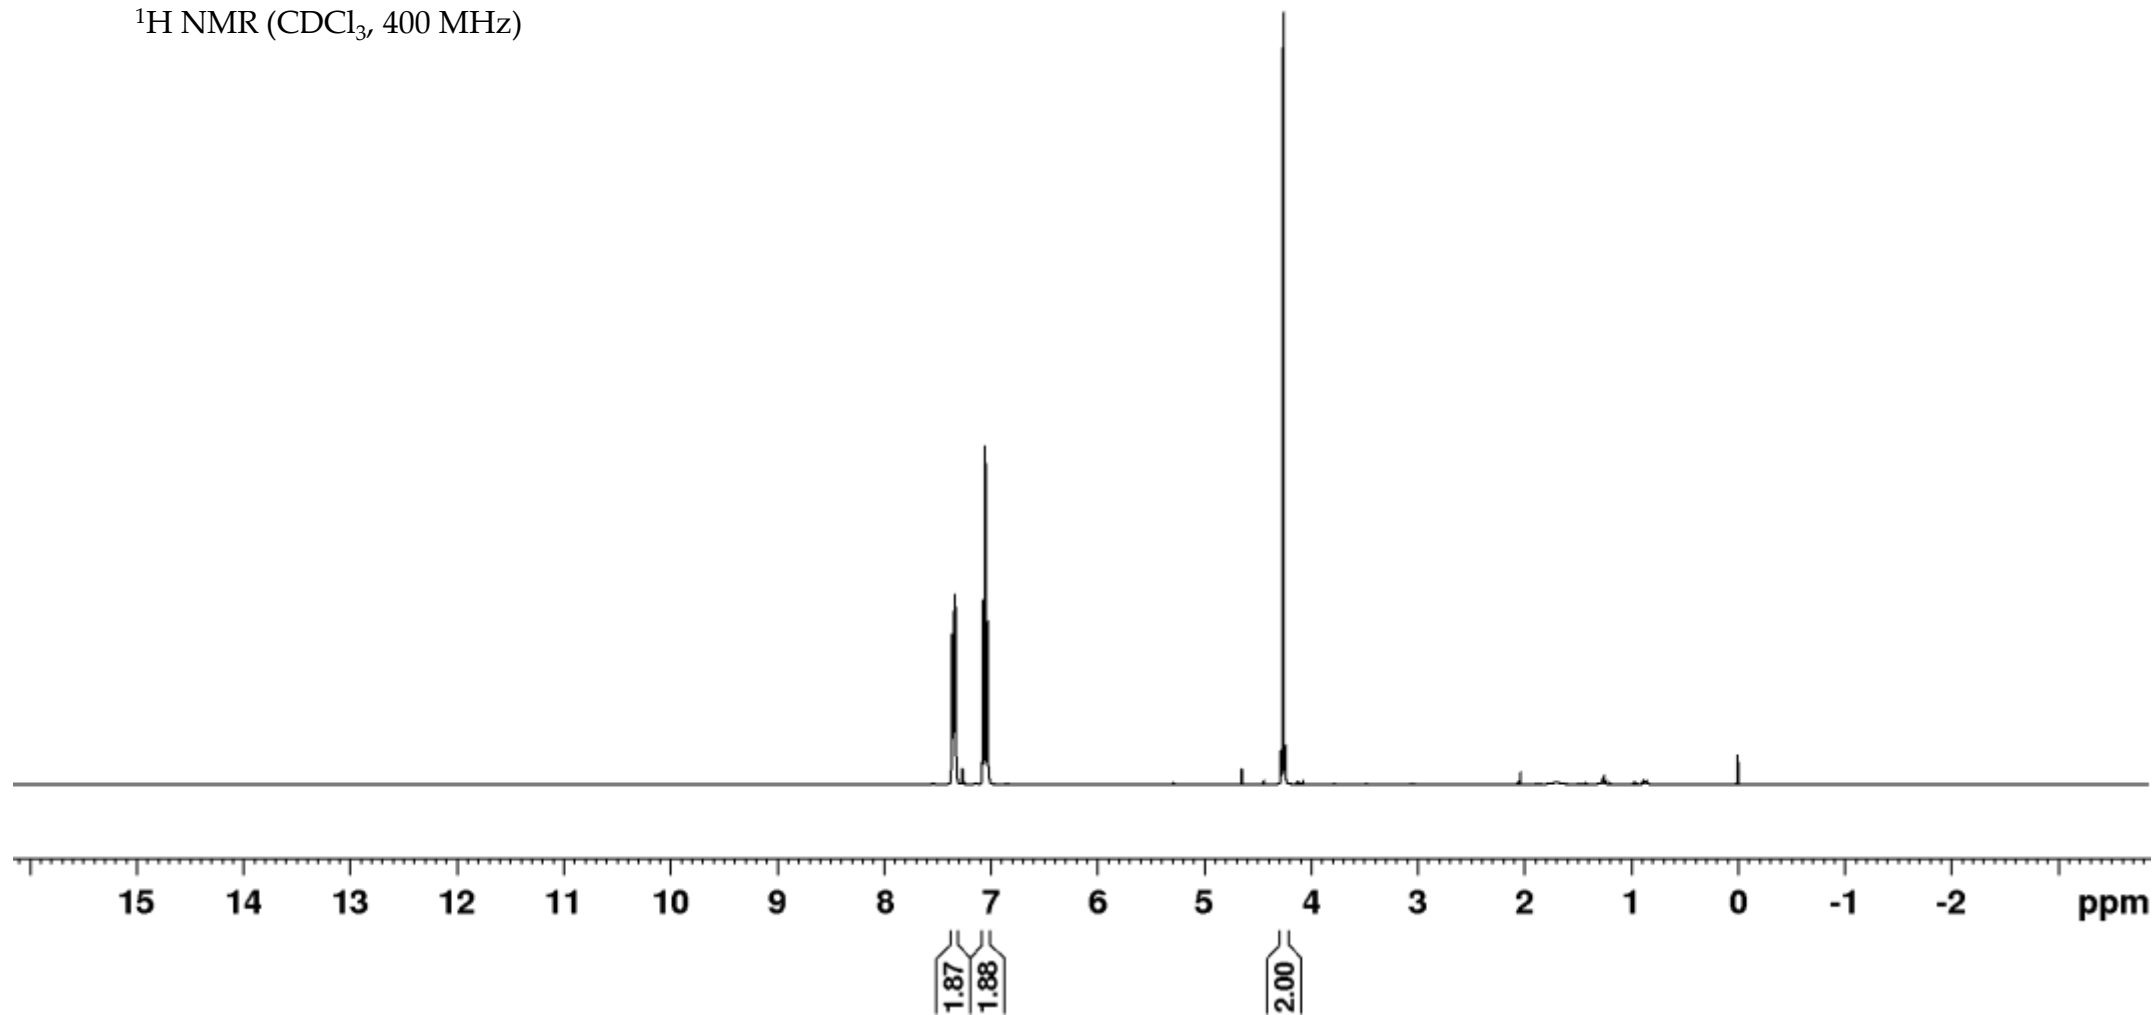

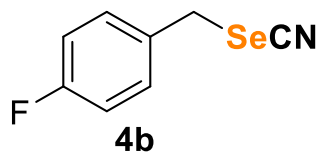

$^{13}\text{C}$  NMR ( $\text{CDCl}_3$ , 100 MHz)

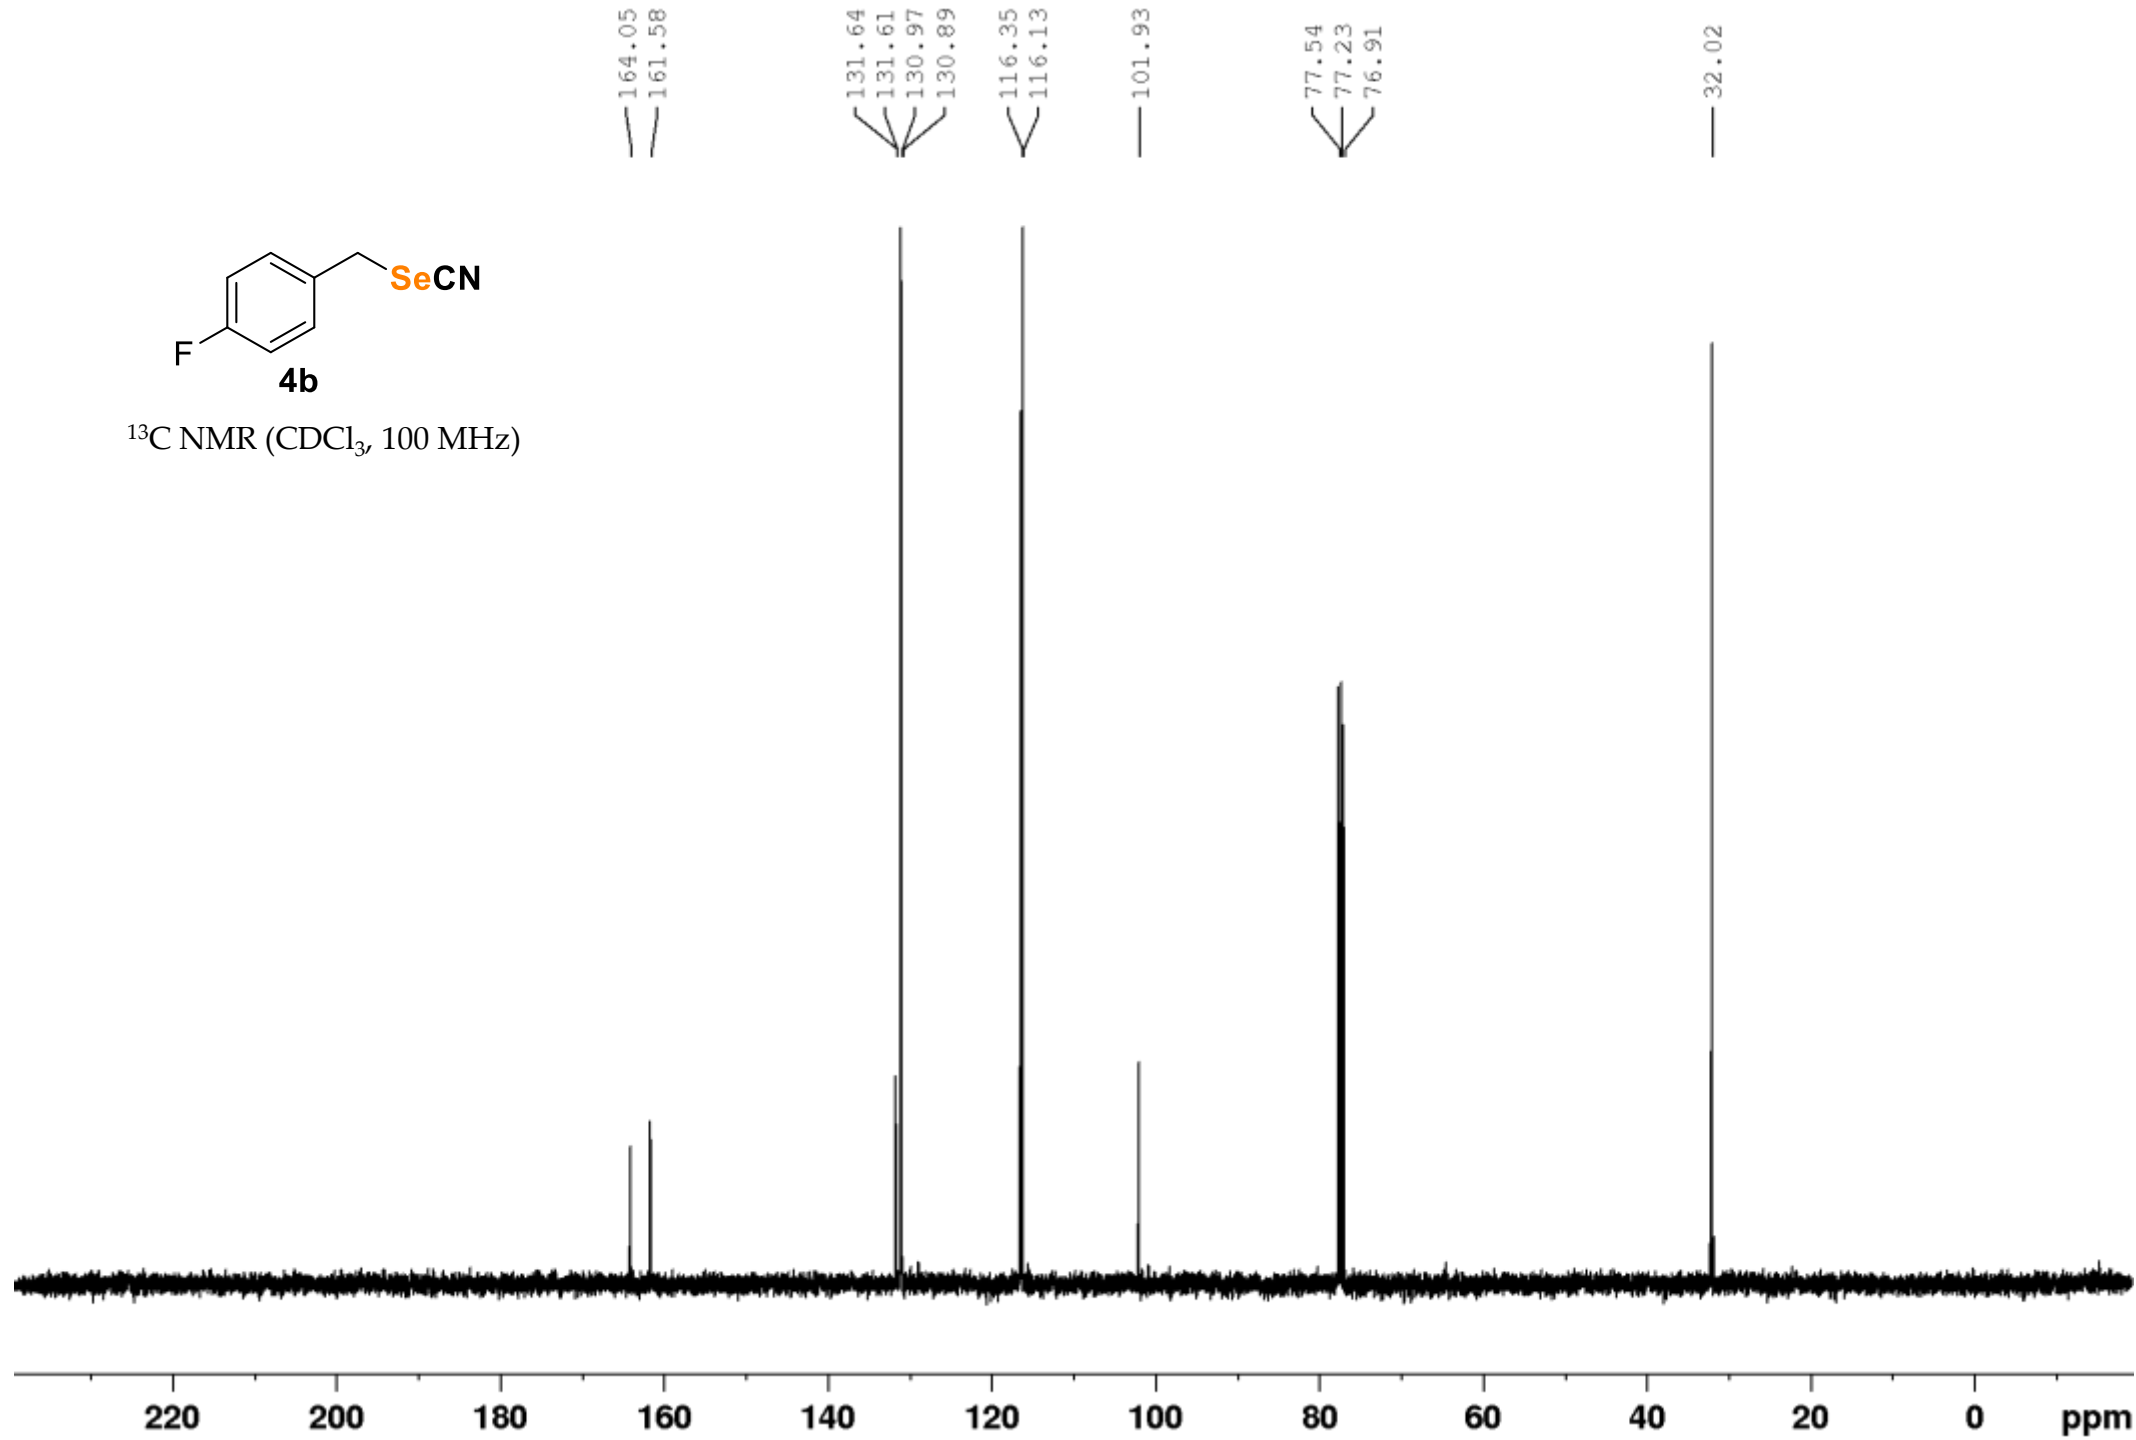

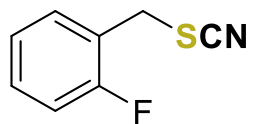

**5a**

$^1\text{H}$  NMR ( $\text{CDCl}_3$ , 400 MHz)

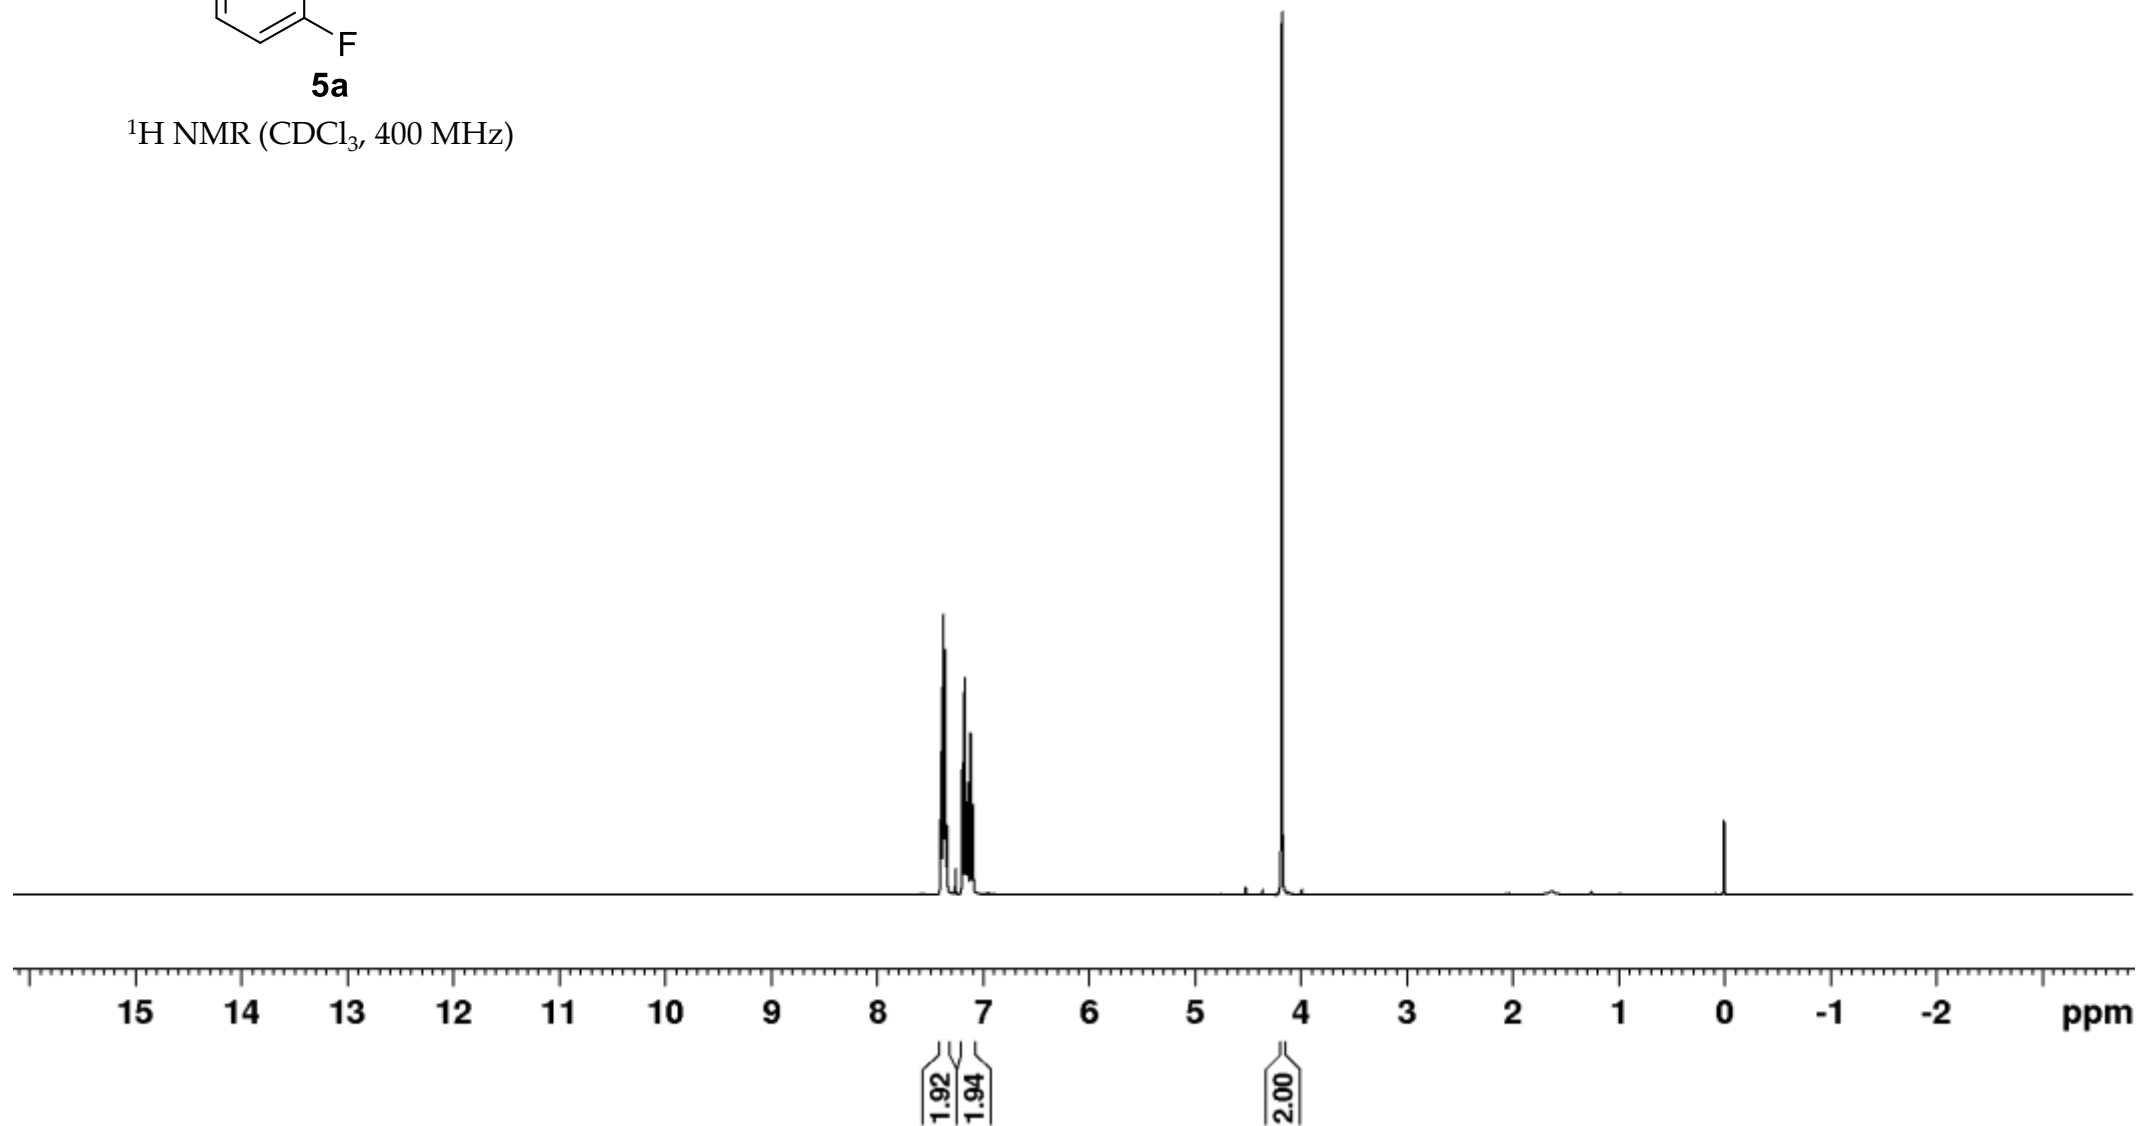

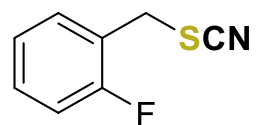

**5a**

$^{13}\text{C}$  NMR ( $\text{CDCl}_3$ , 100 MHz)

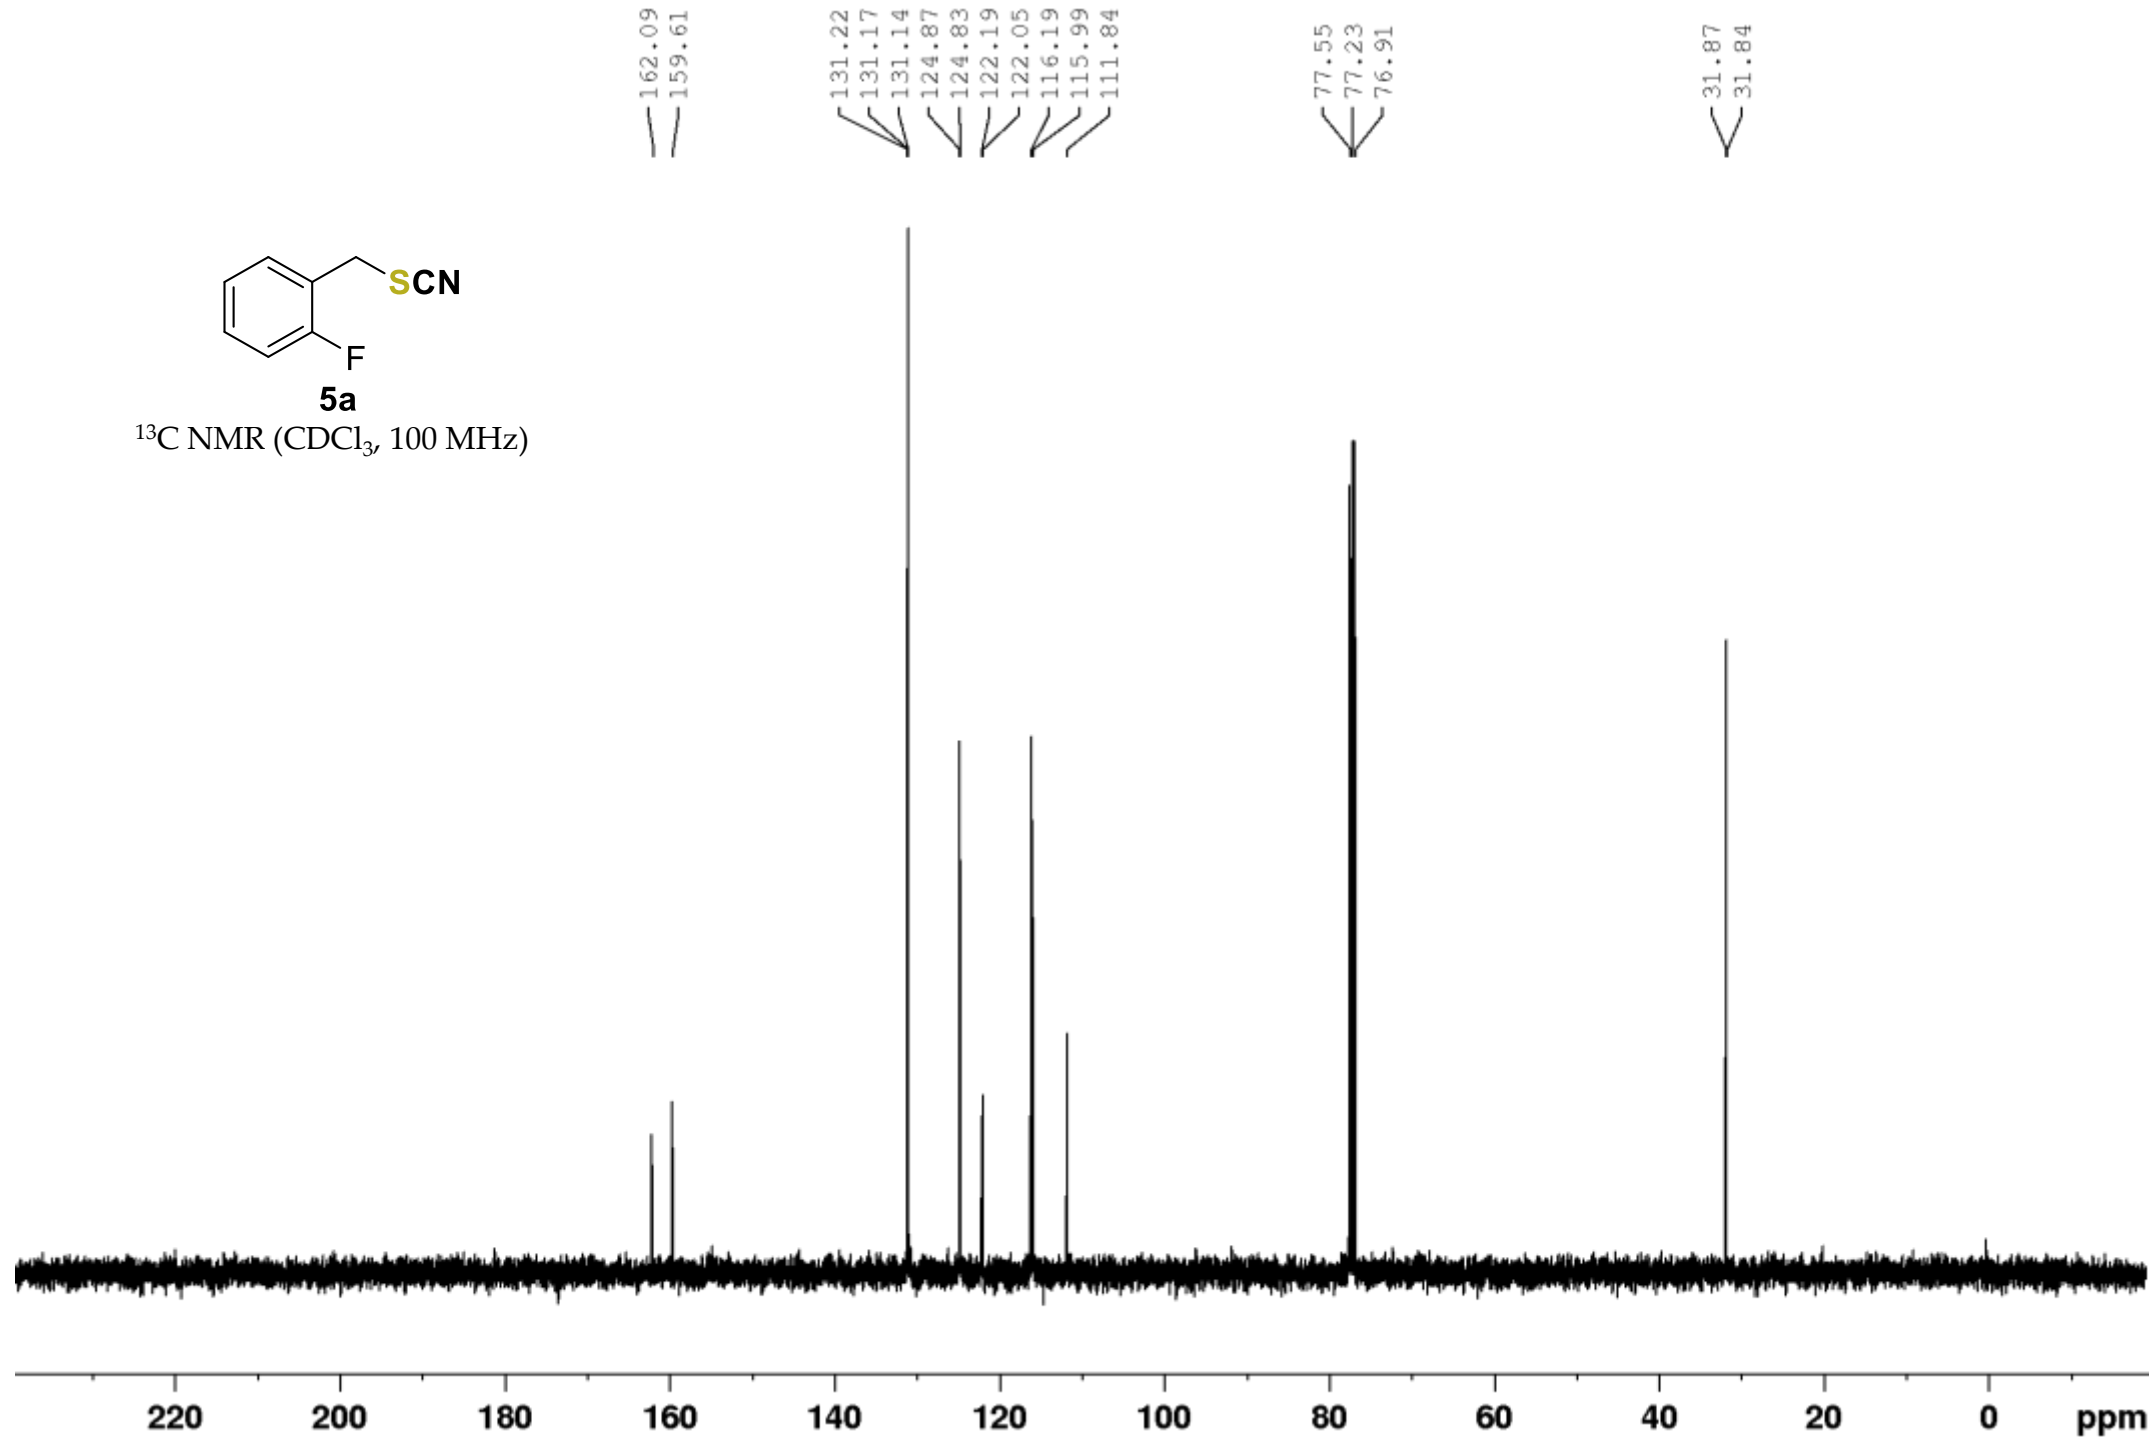

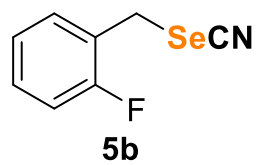

$^1\text{H}$  NMR ( $\text{CDCl}_3$ , 400 MHz)

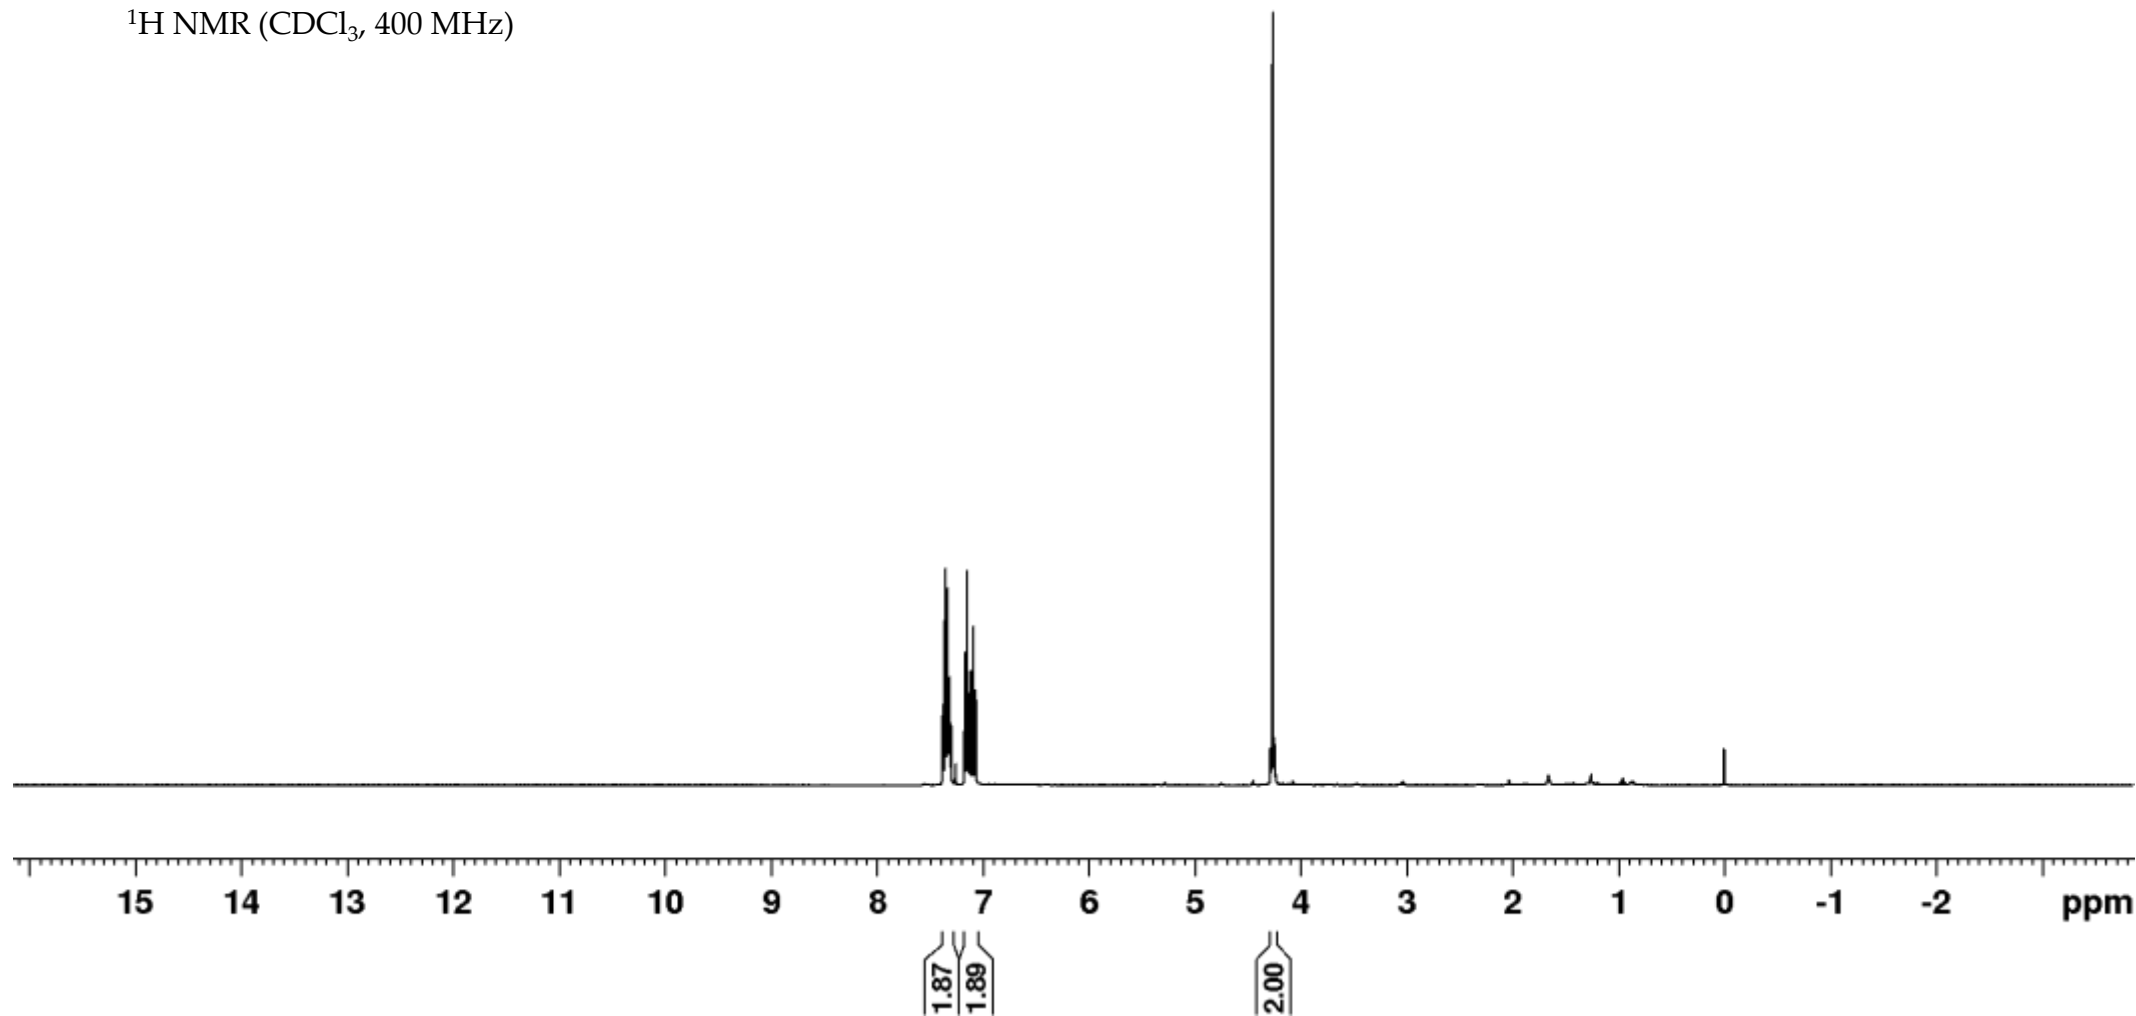

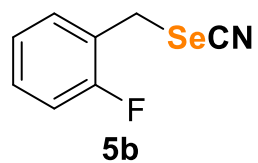

$^{13}\text{C}$  NMR ( $\text{CDCl}_3$ , 100 MHz)

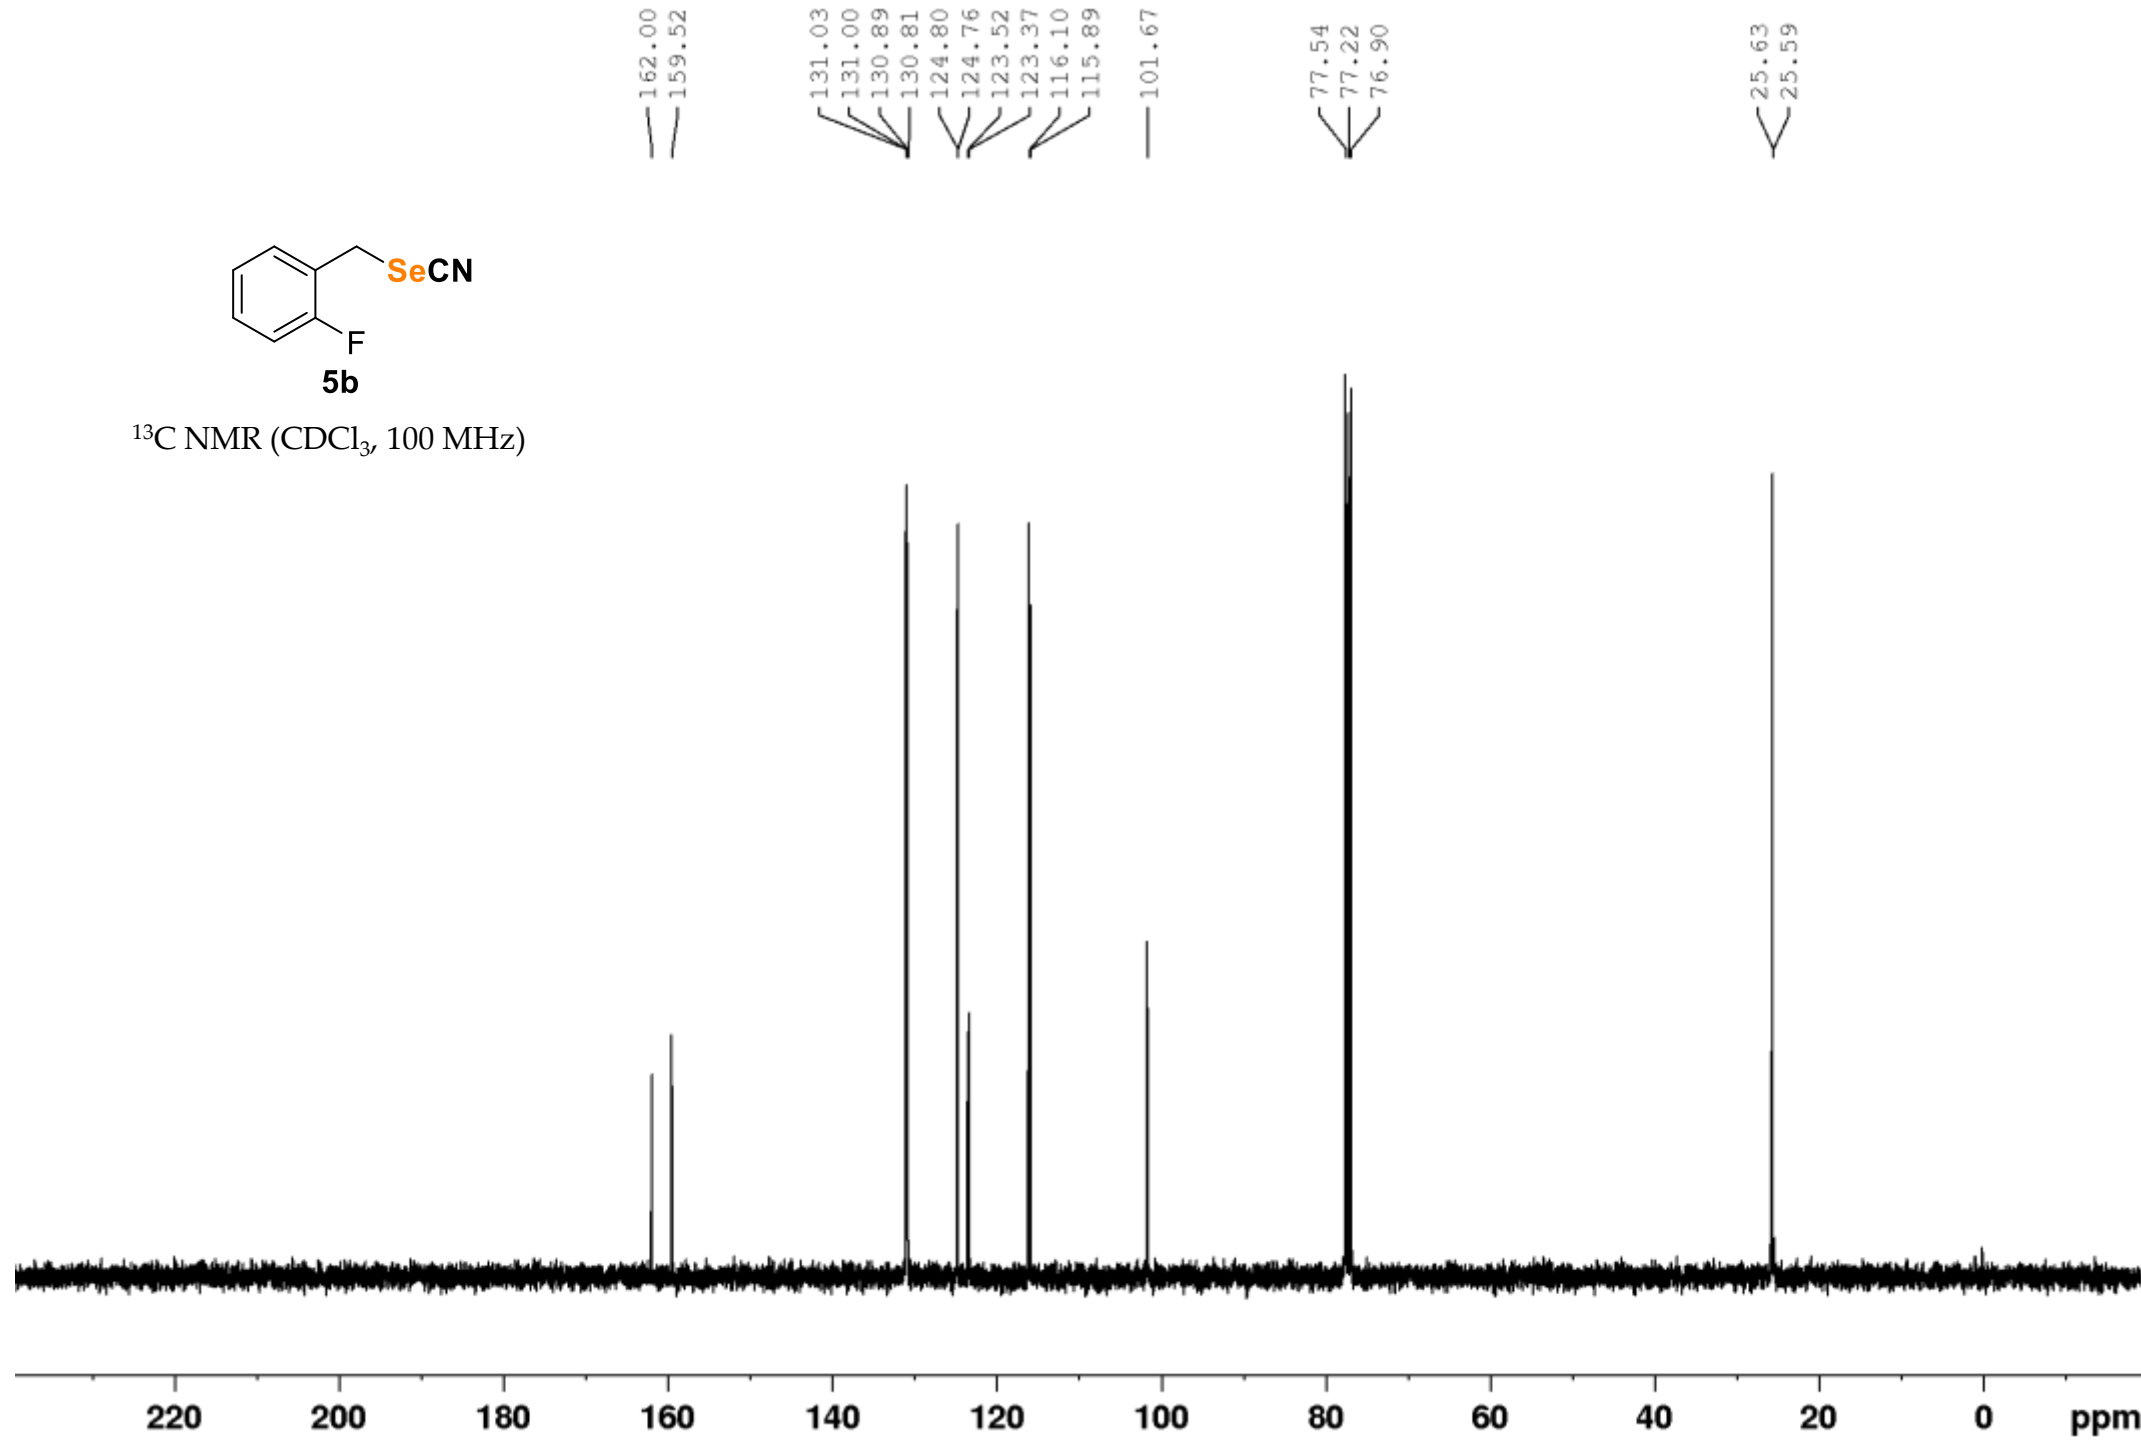

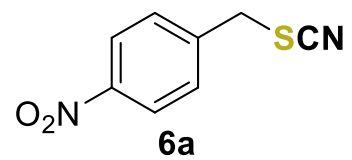

$^1\text{H}$  NMR ( $\text{CDCl}_3$ , 400 MHz)

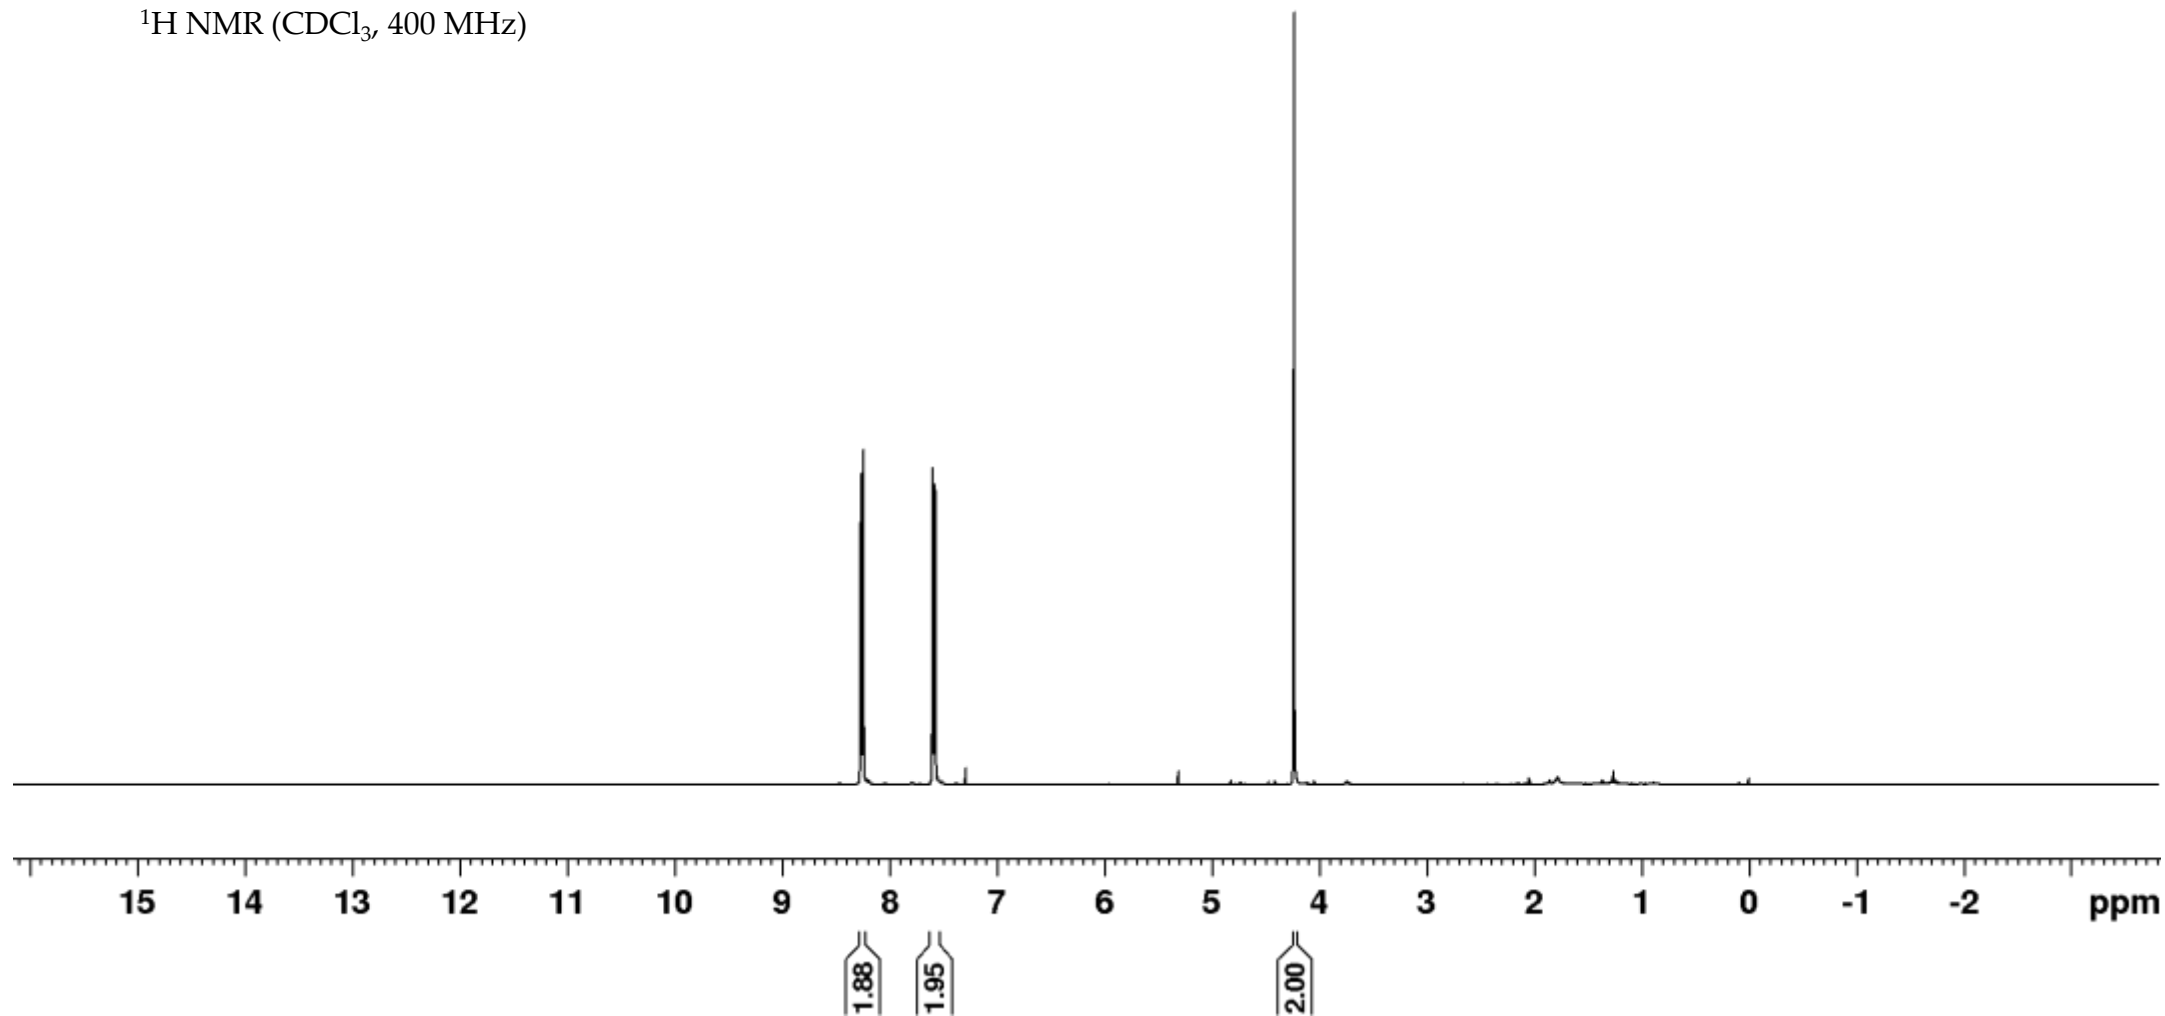



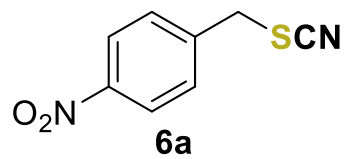

$^{13}\text{C}$  NMR ( $\text{CDCl}_3$ , 100 MHz)

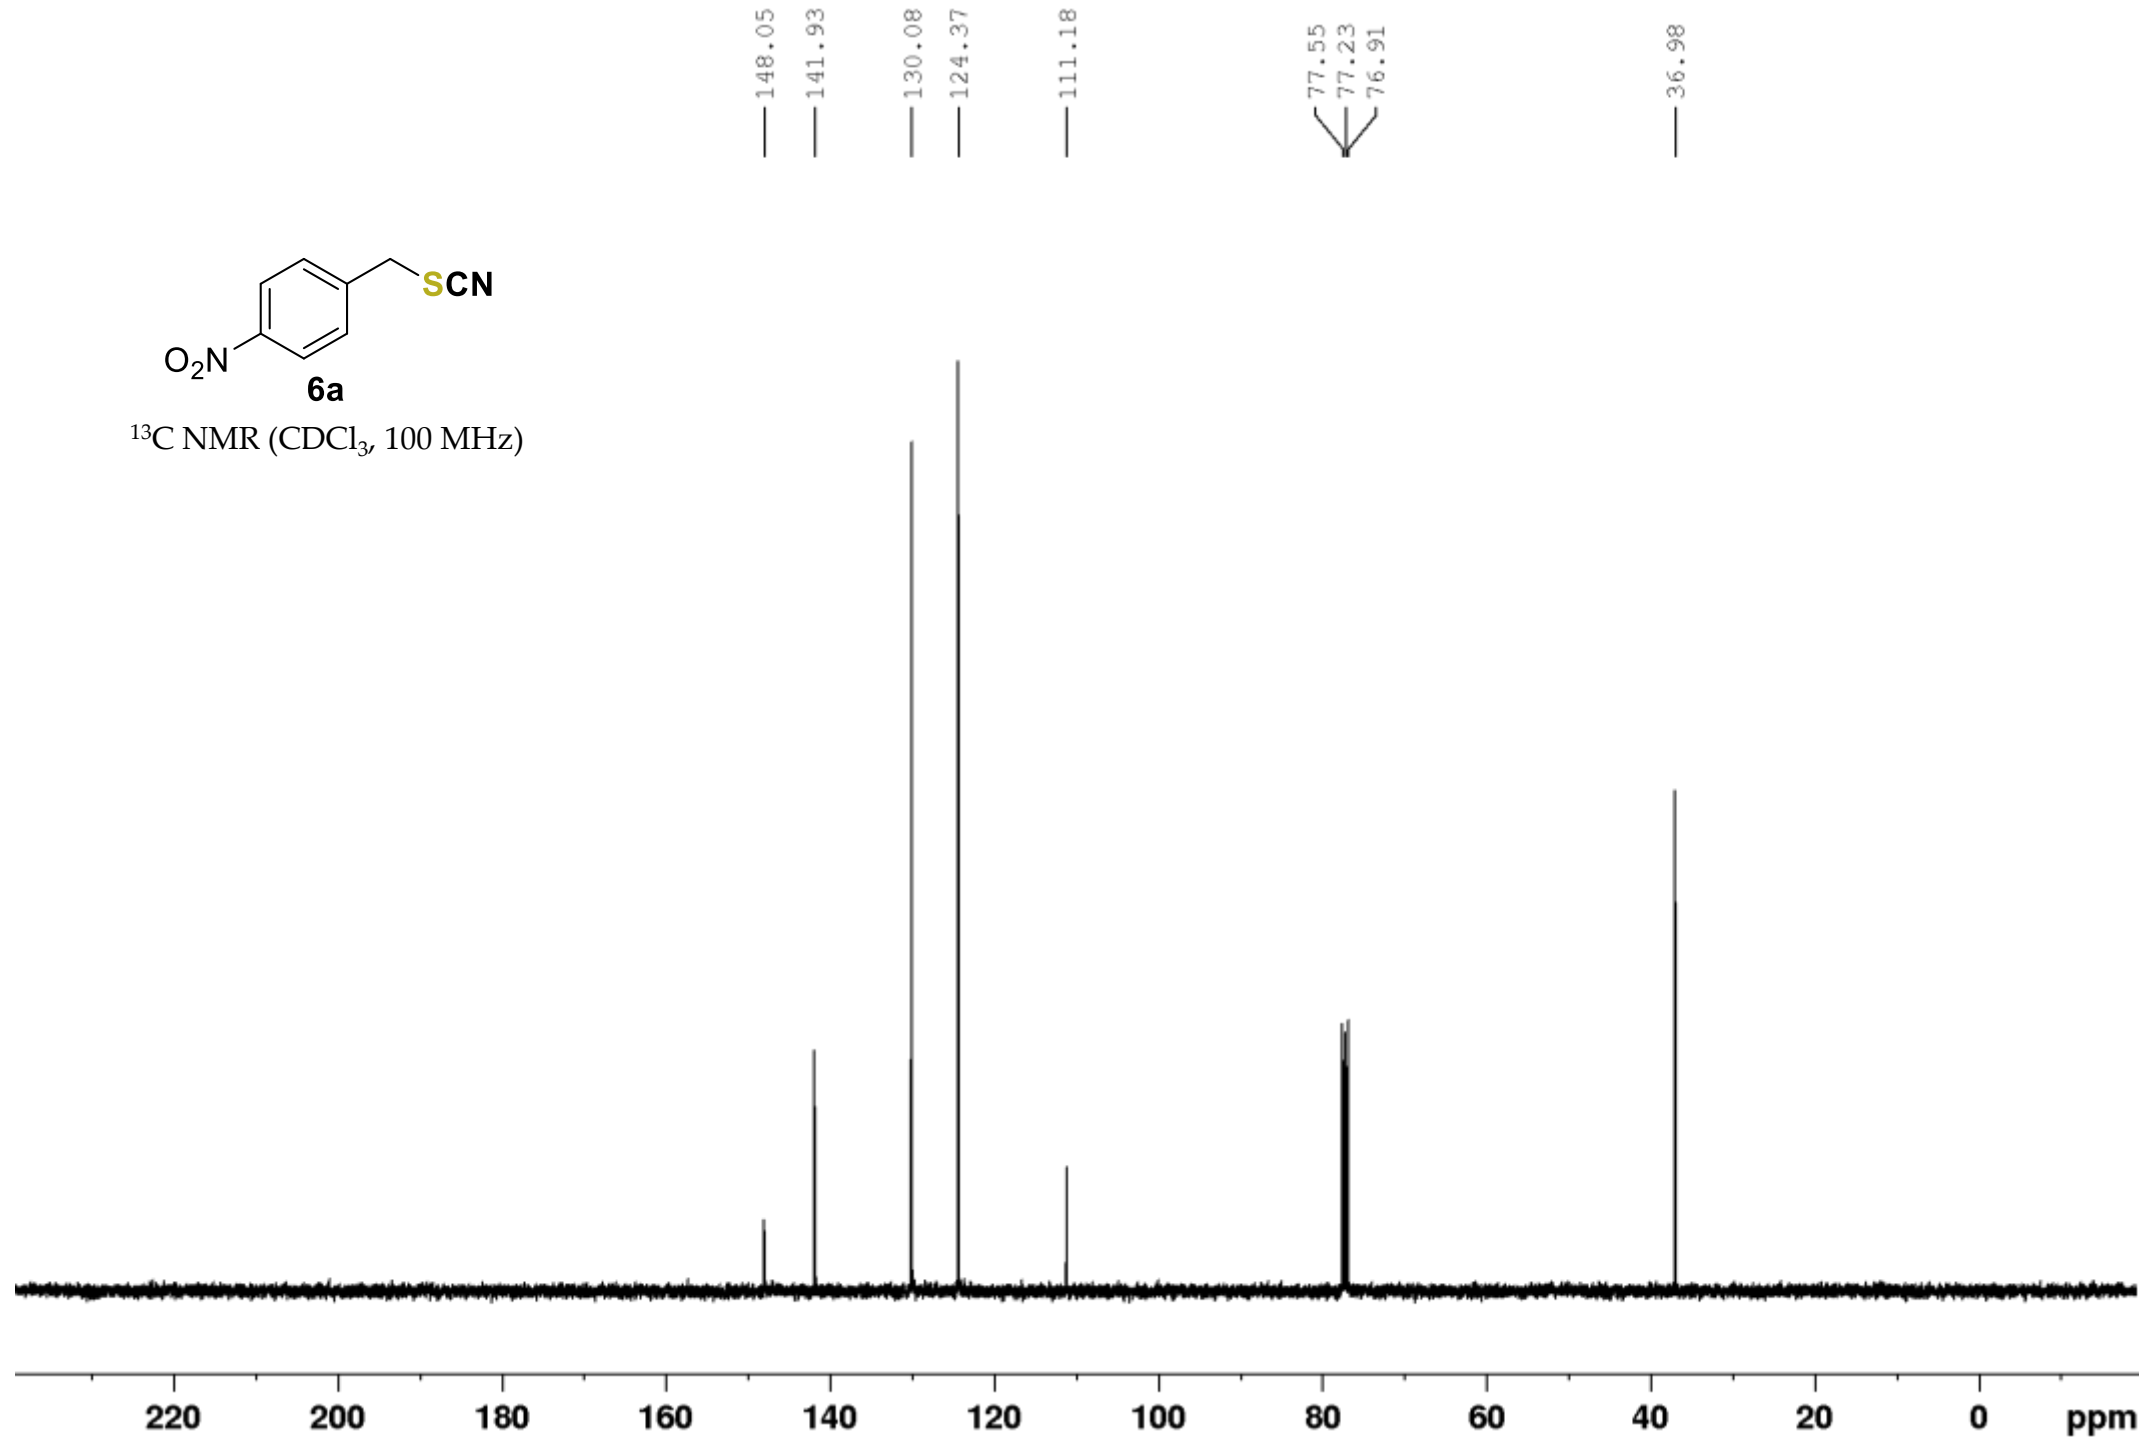

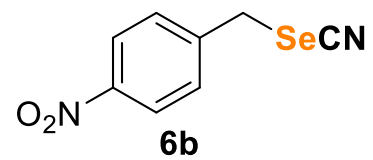

$^1\text{H}$  NMR ( $\text{CDCl}_3$ , 400 MHz)

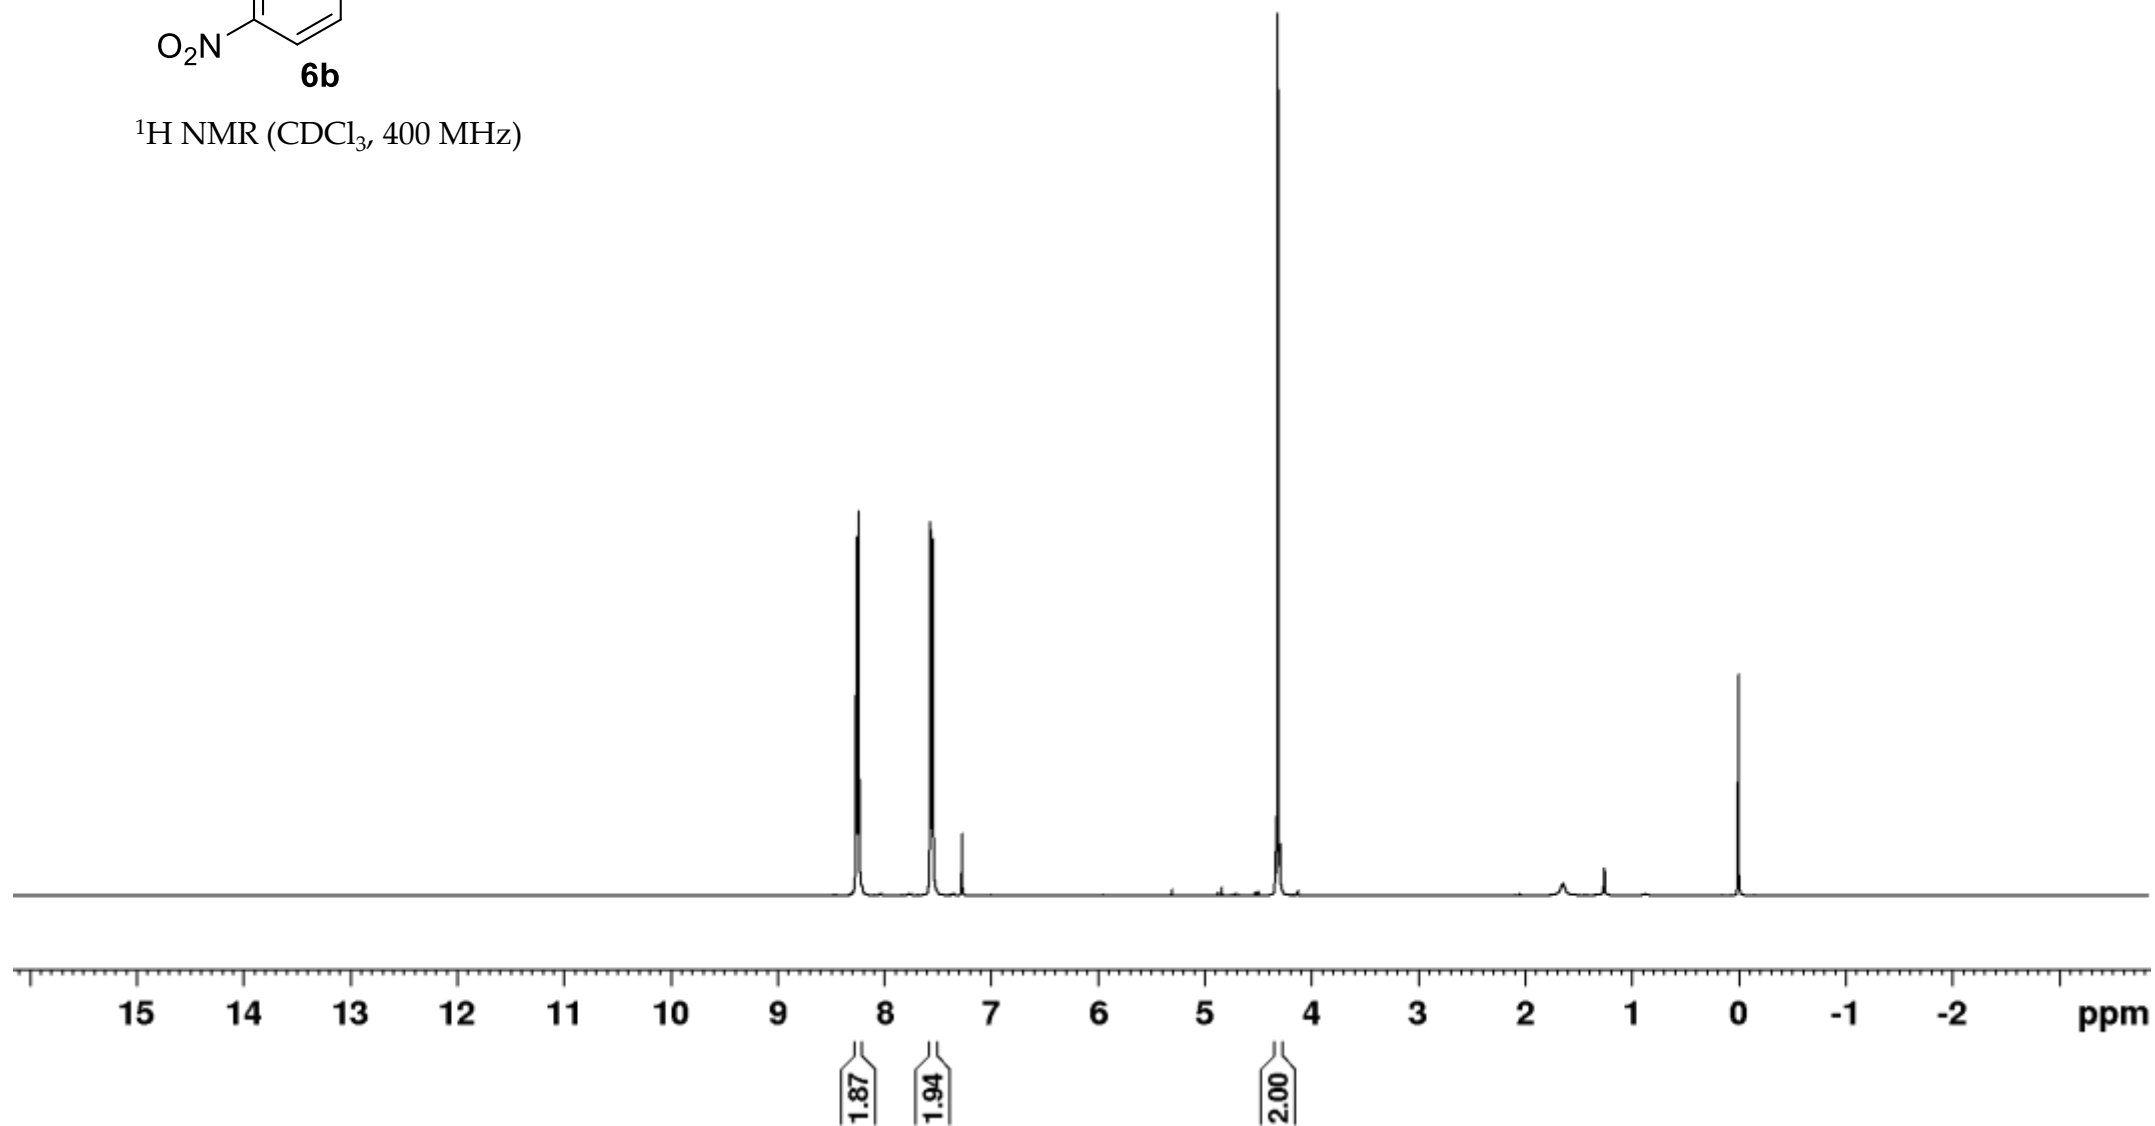

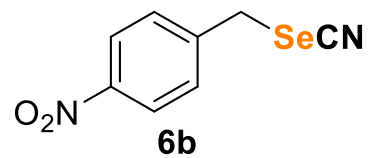

$^{13}\text{C}$  NMR ( $\text{CDCl}_3$ , 100 MHz)

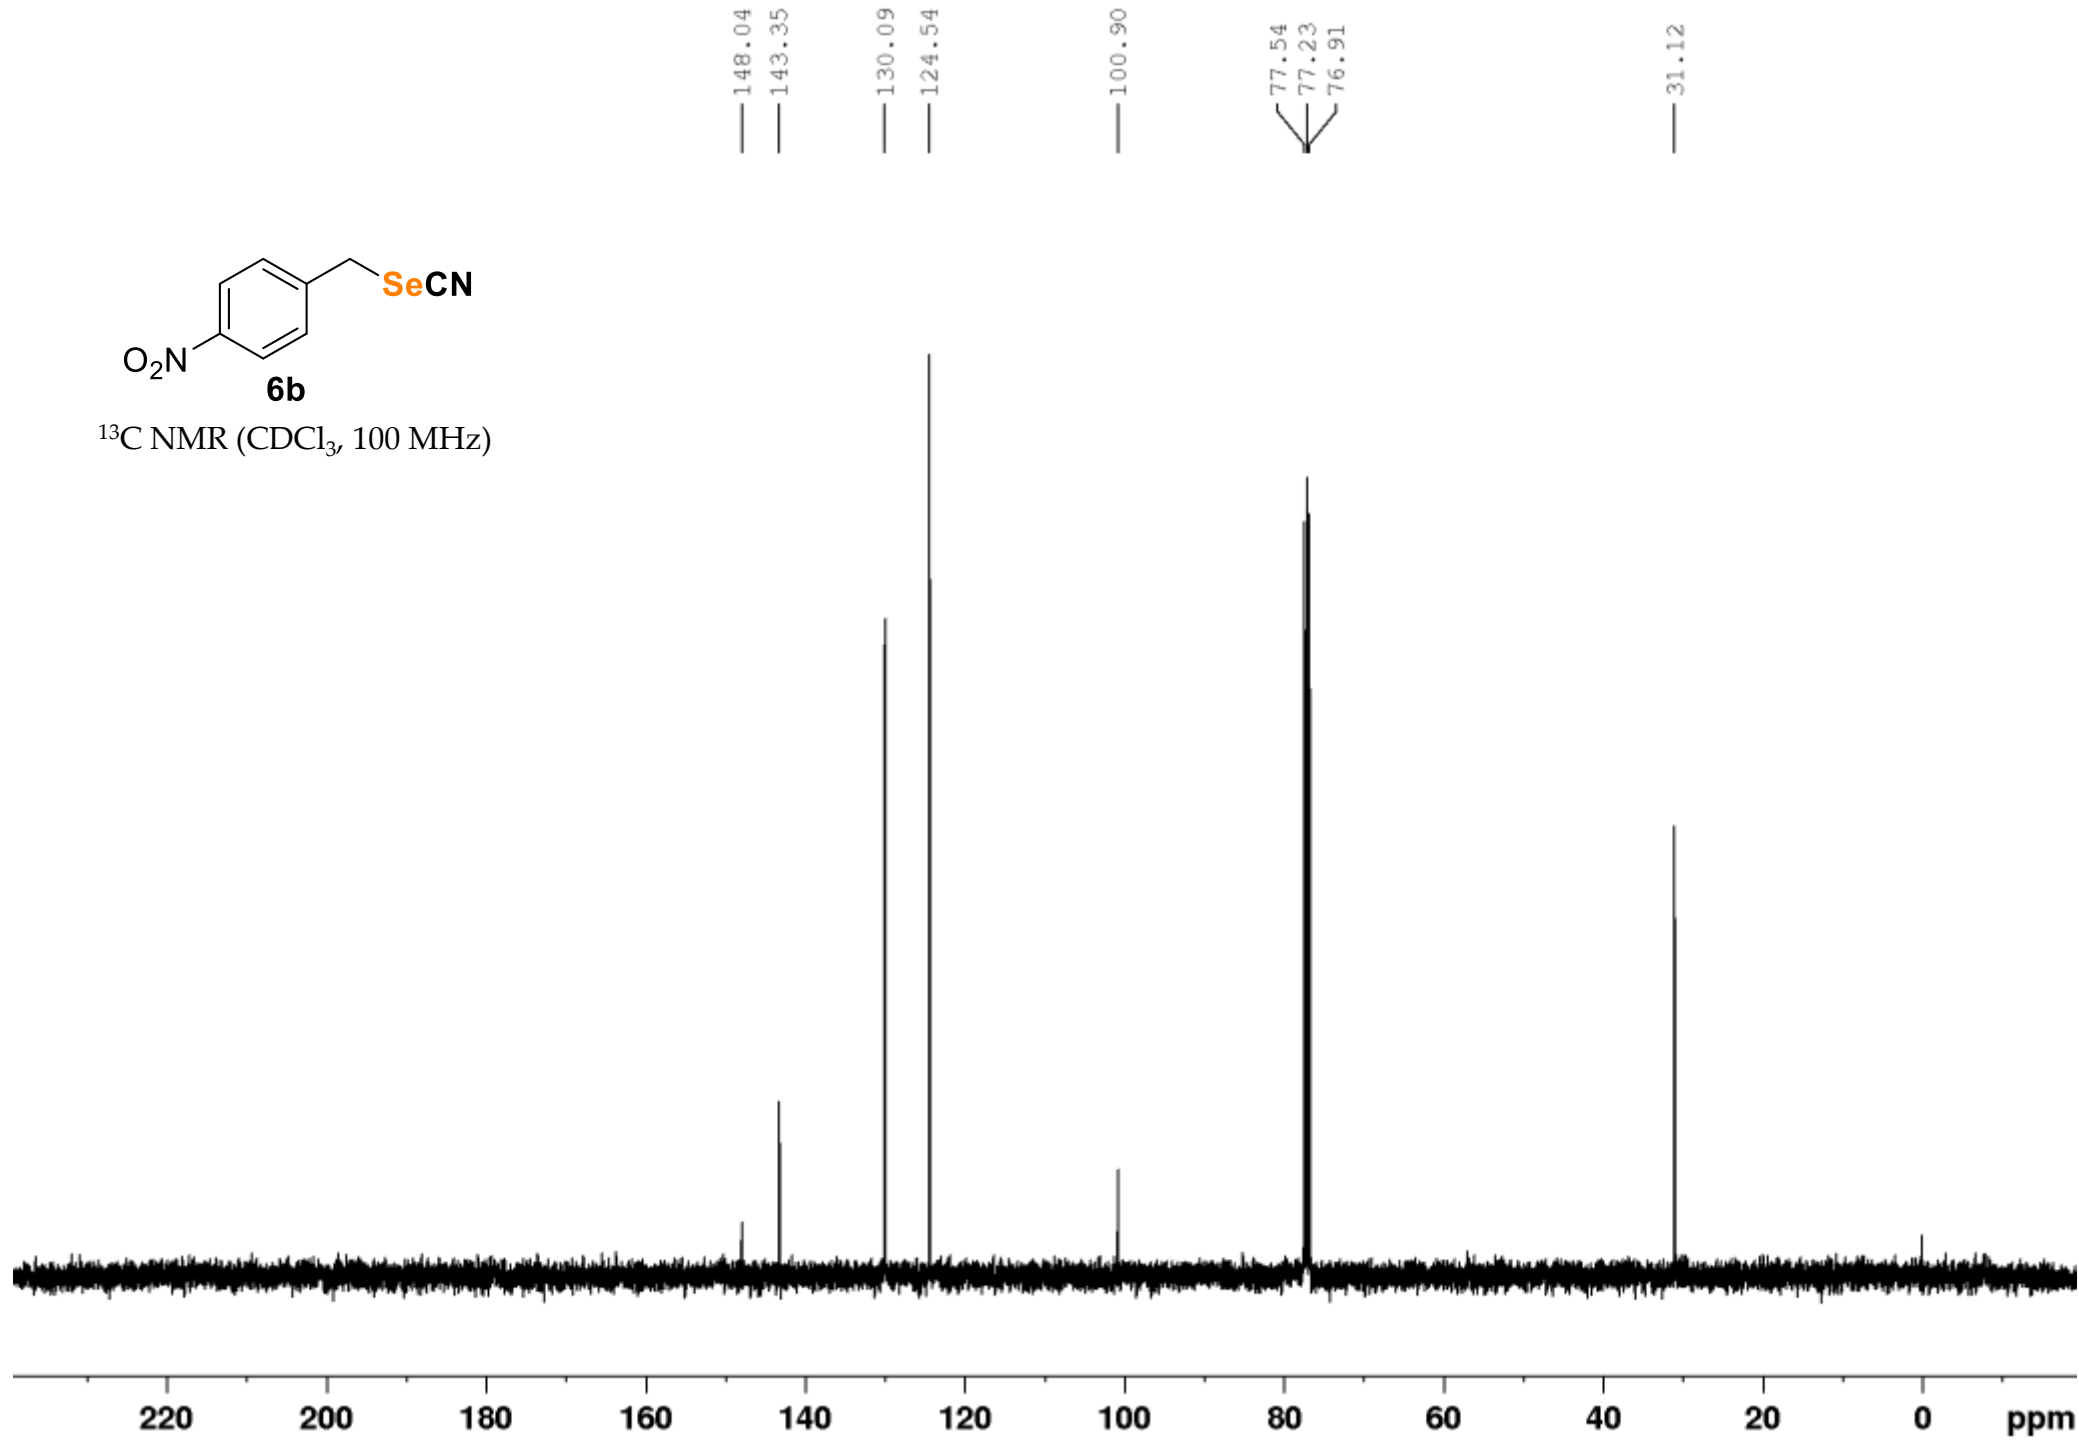

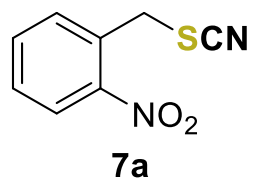

$^1\text{H}$  NMR ( $\text{CDCl}_3$ , 400 MHz)

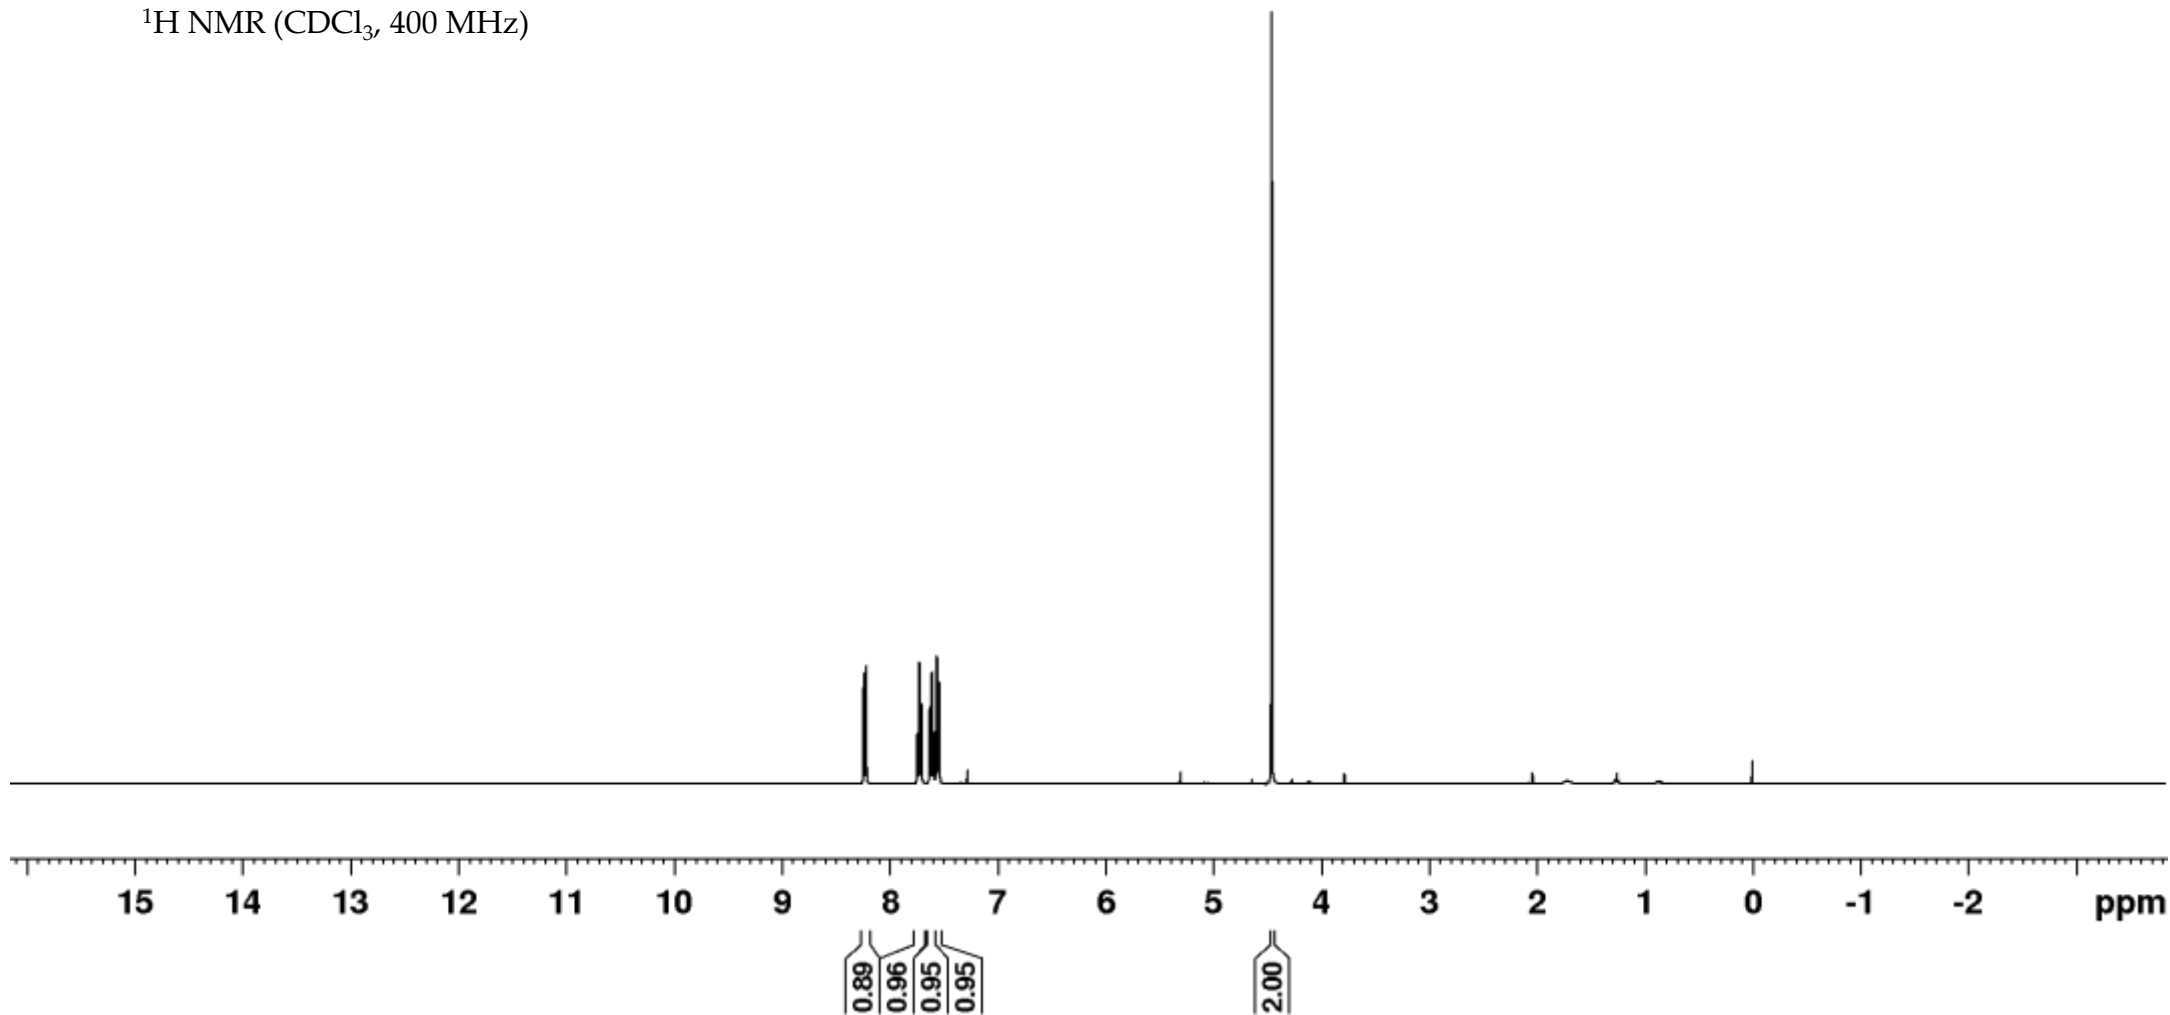

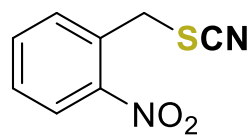

**7a**

$^{13}\text{C}$  NMR( $\text{CDCl}_3$ , 100 MHz)

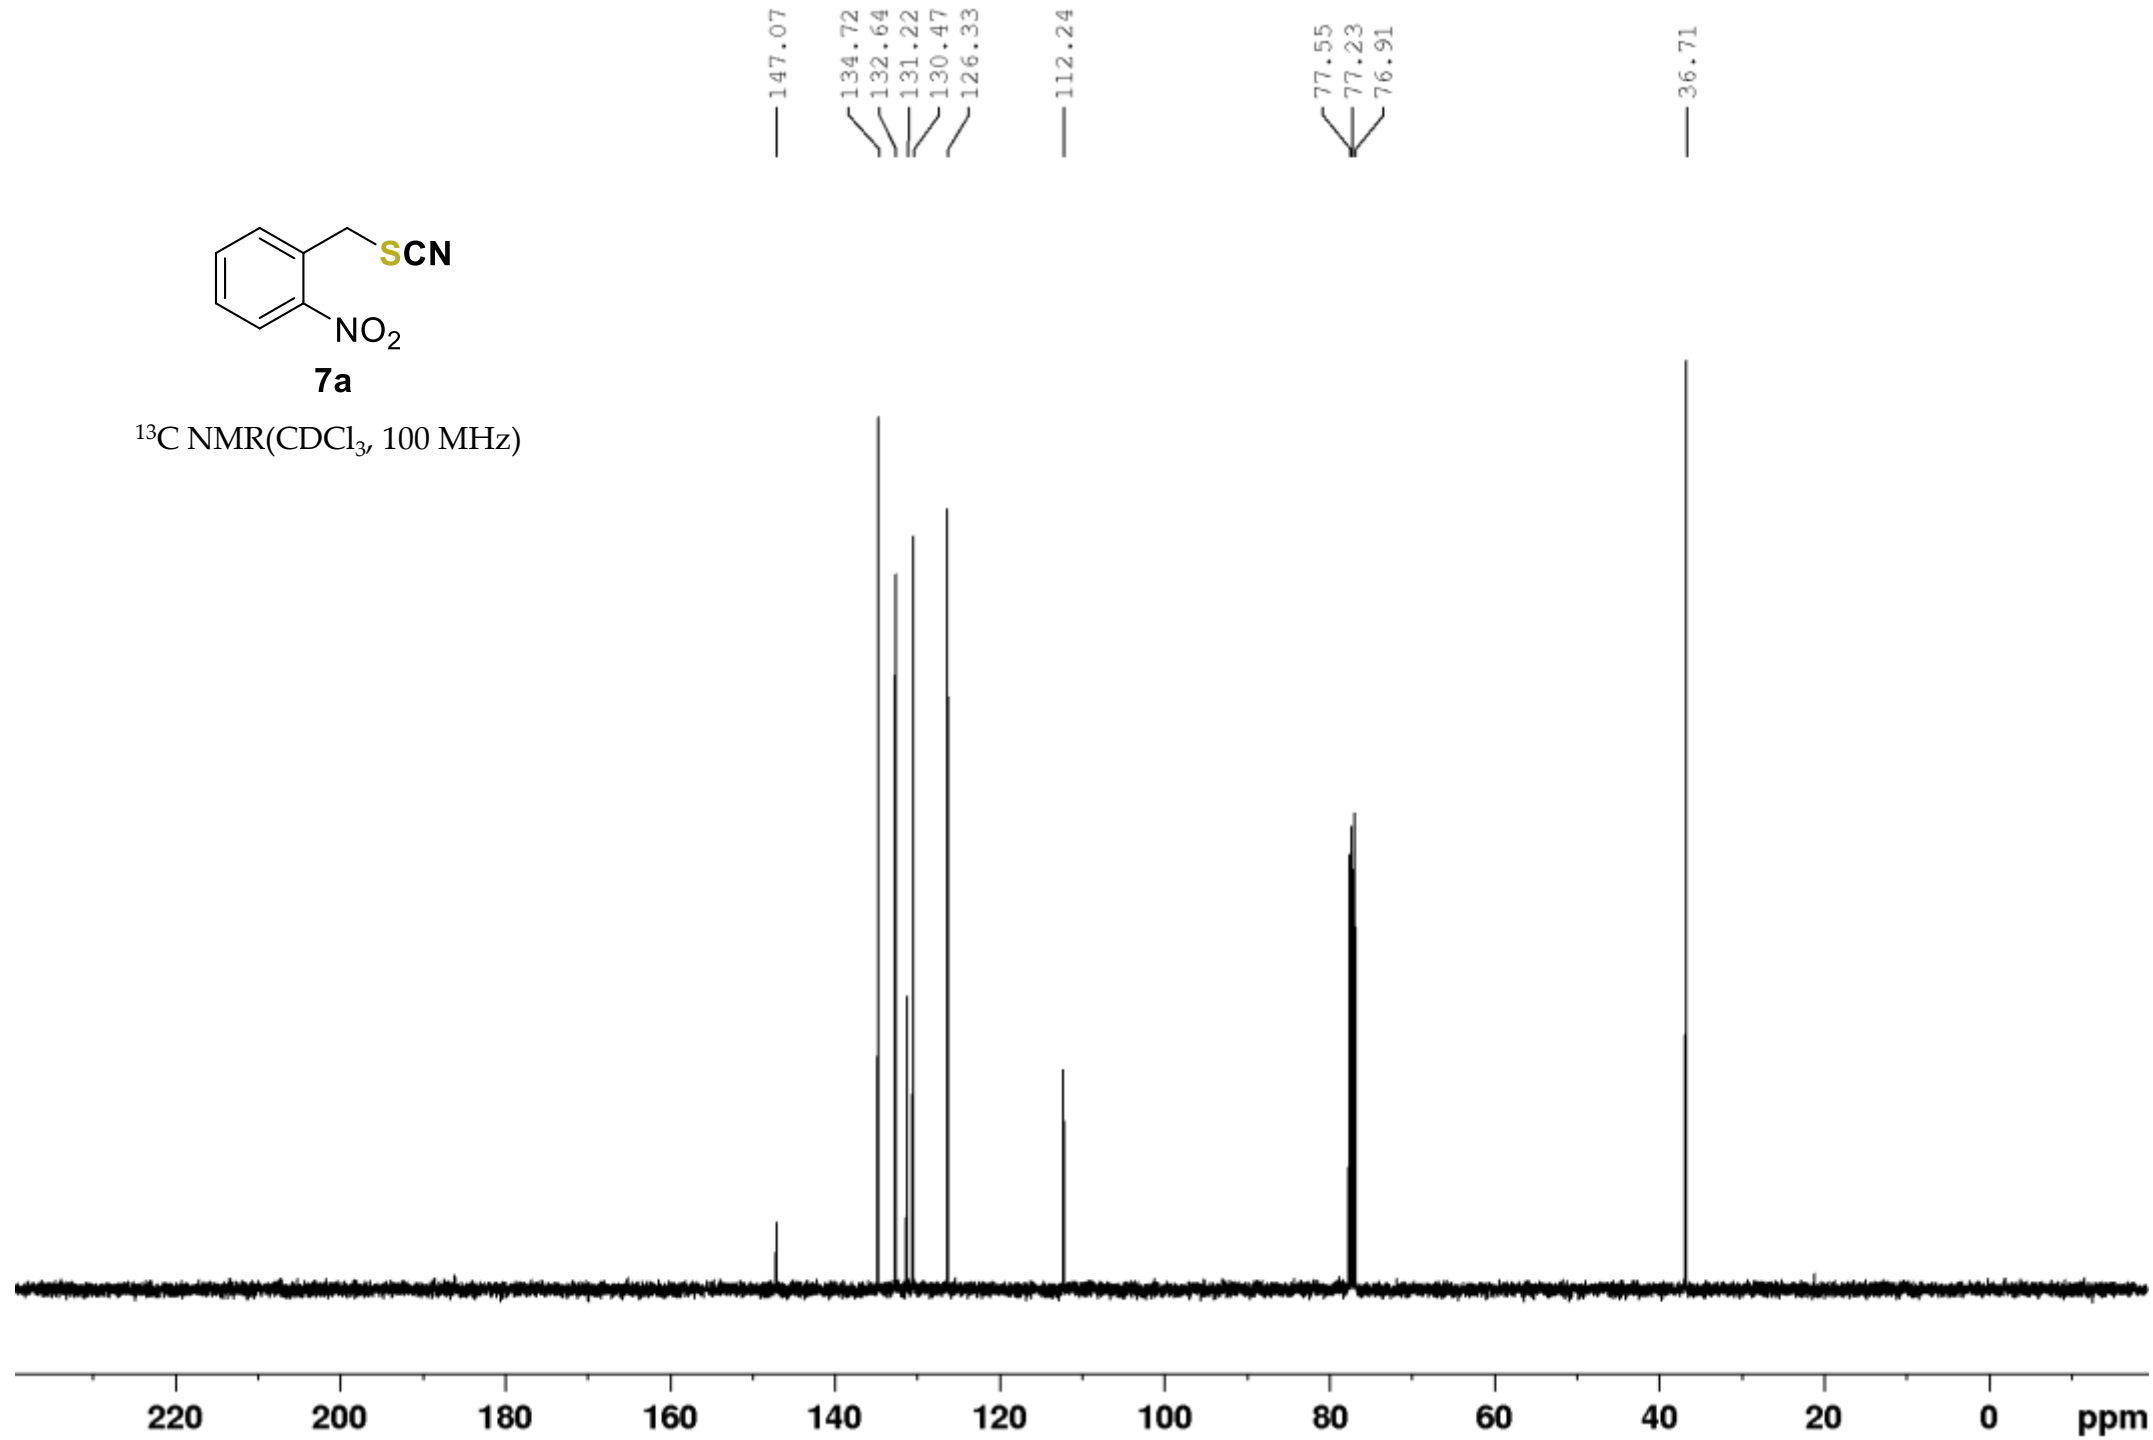

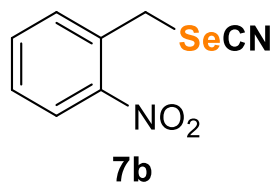

$^1\text{H}$  NMR ( $\text{CDCl}_3$ , 400 MHz)

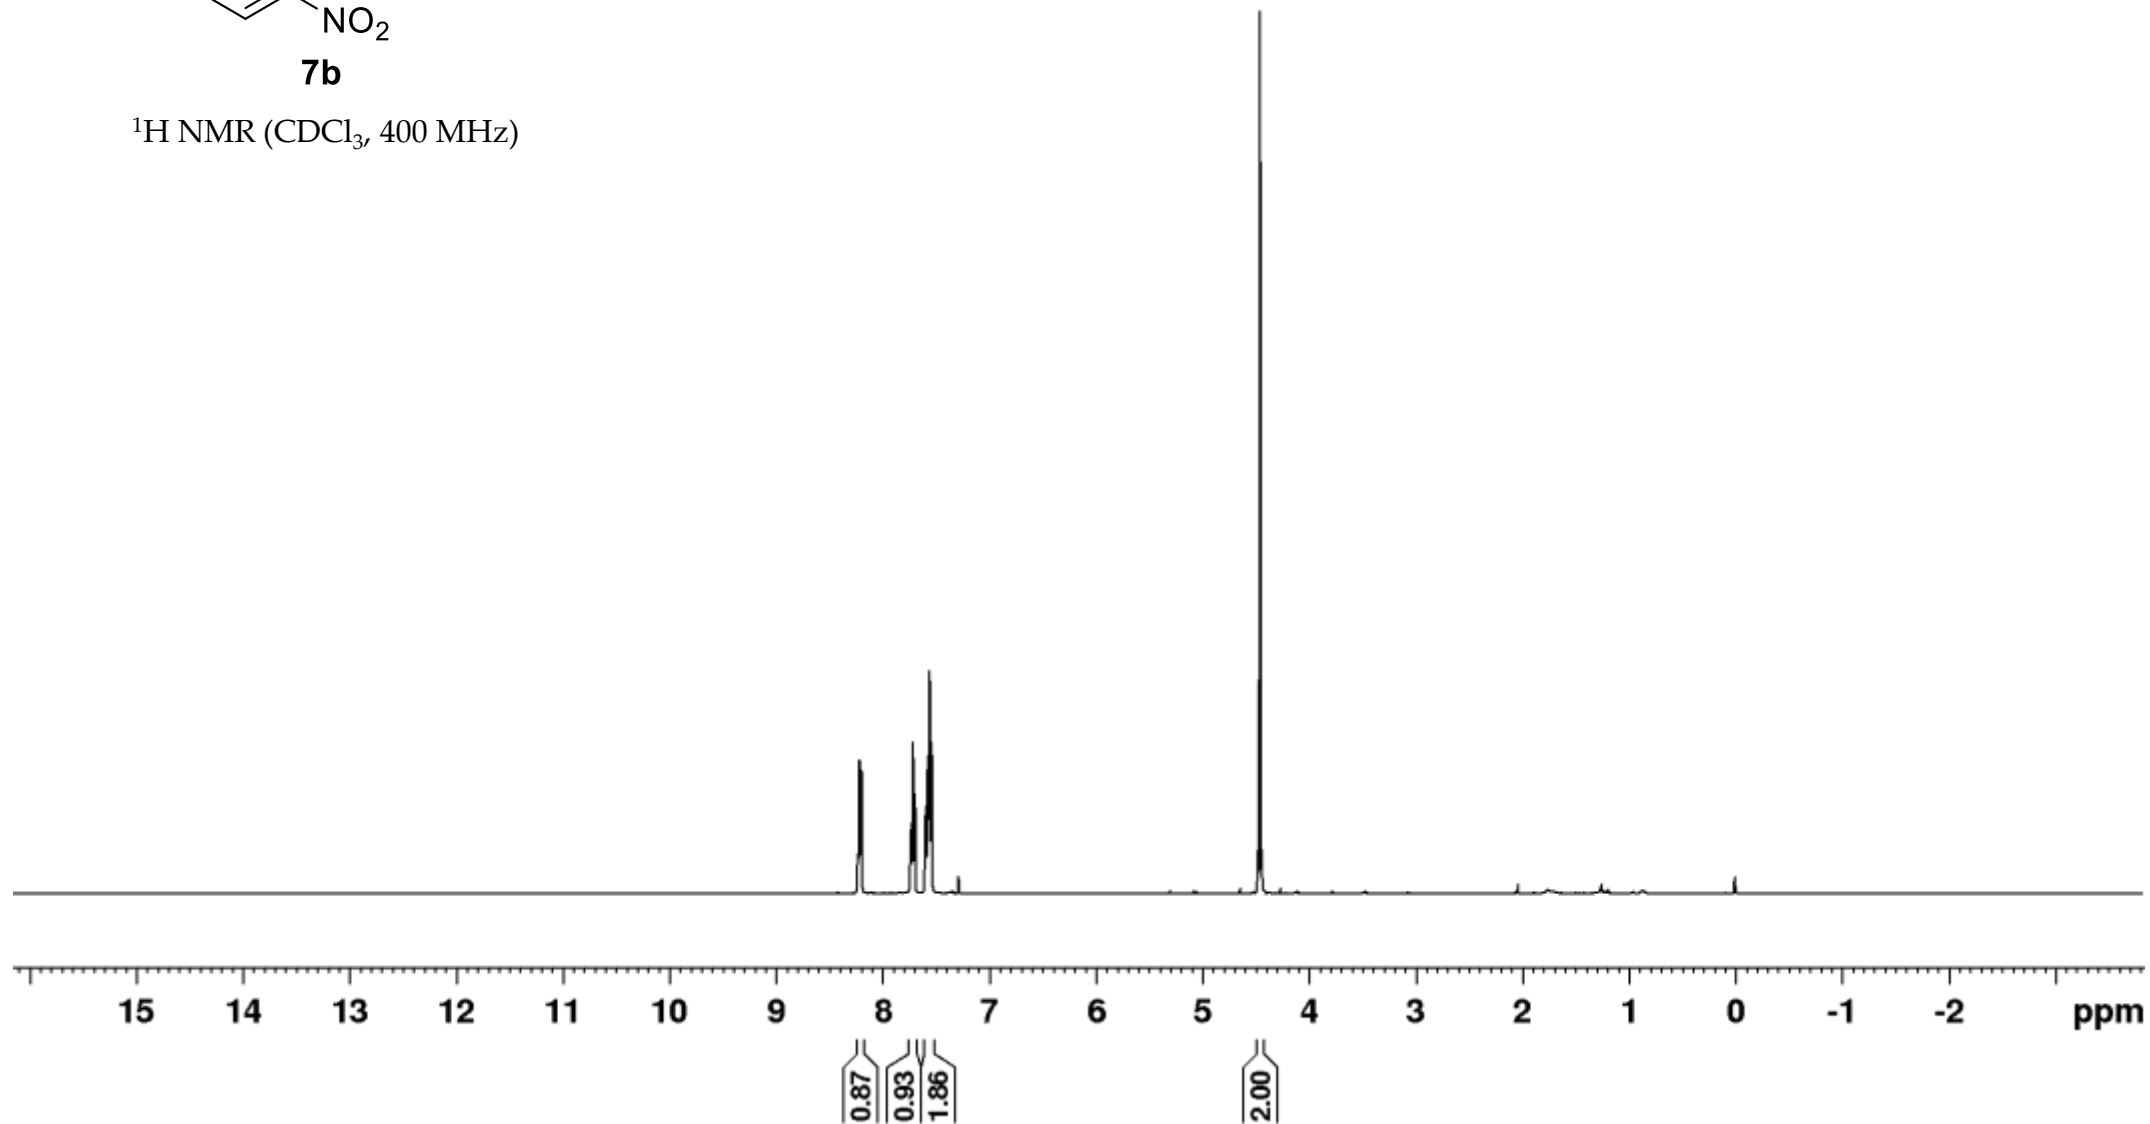

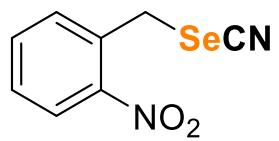

**7b**

$^{13}\text{C}$  NMR ( $\text{CDCl}_3$ , 100 MHz)

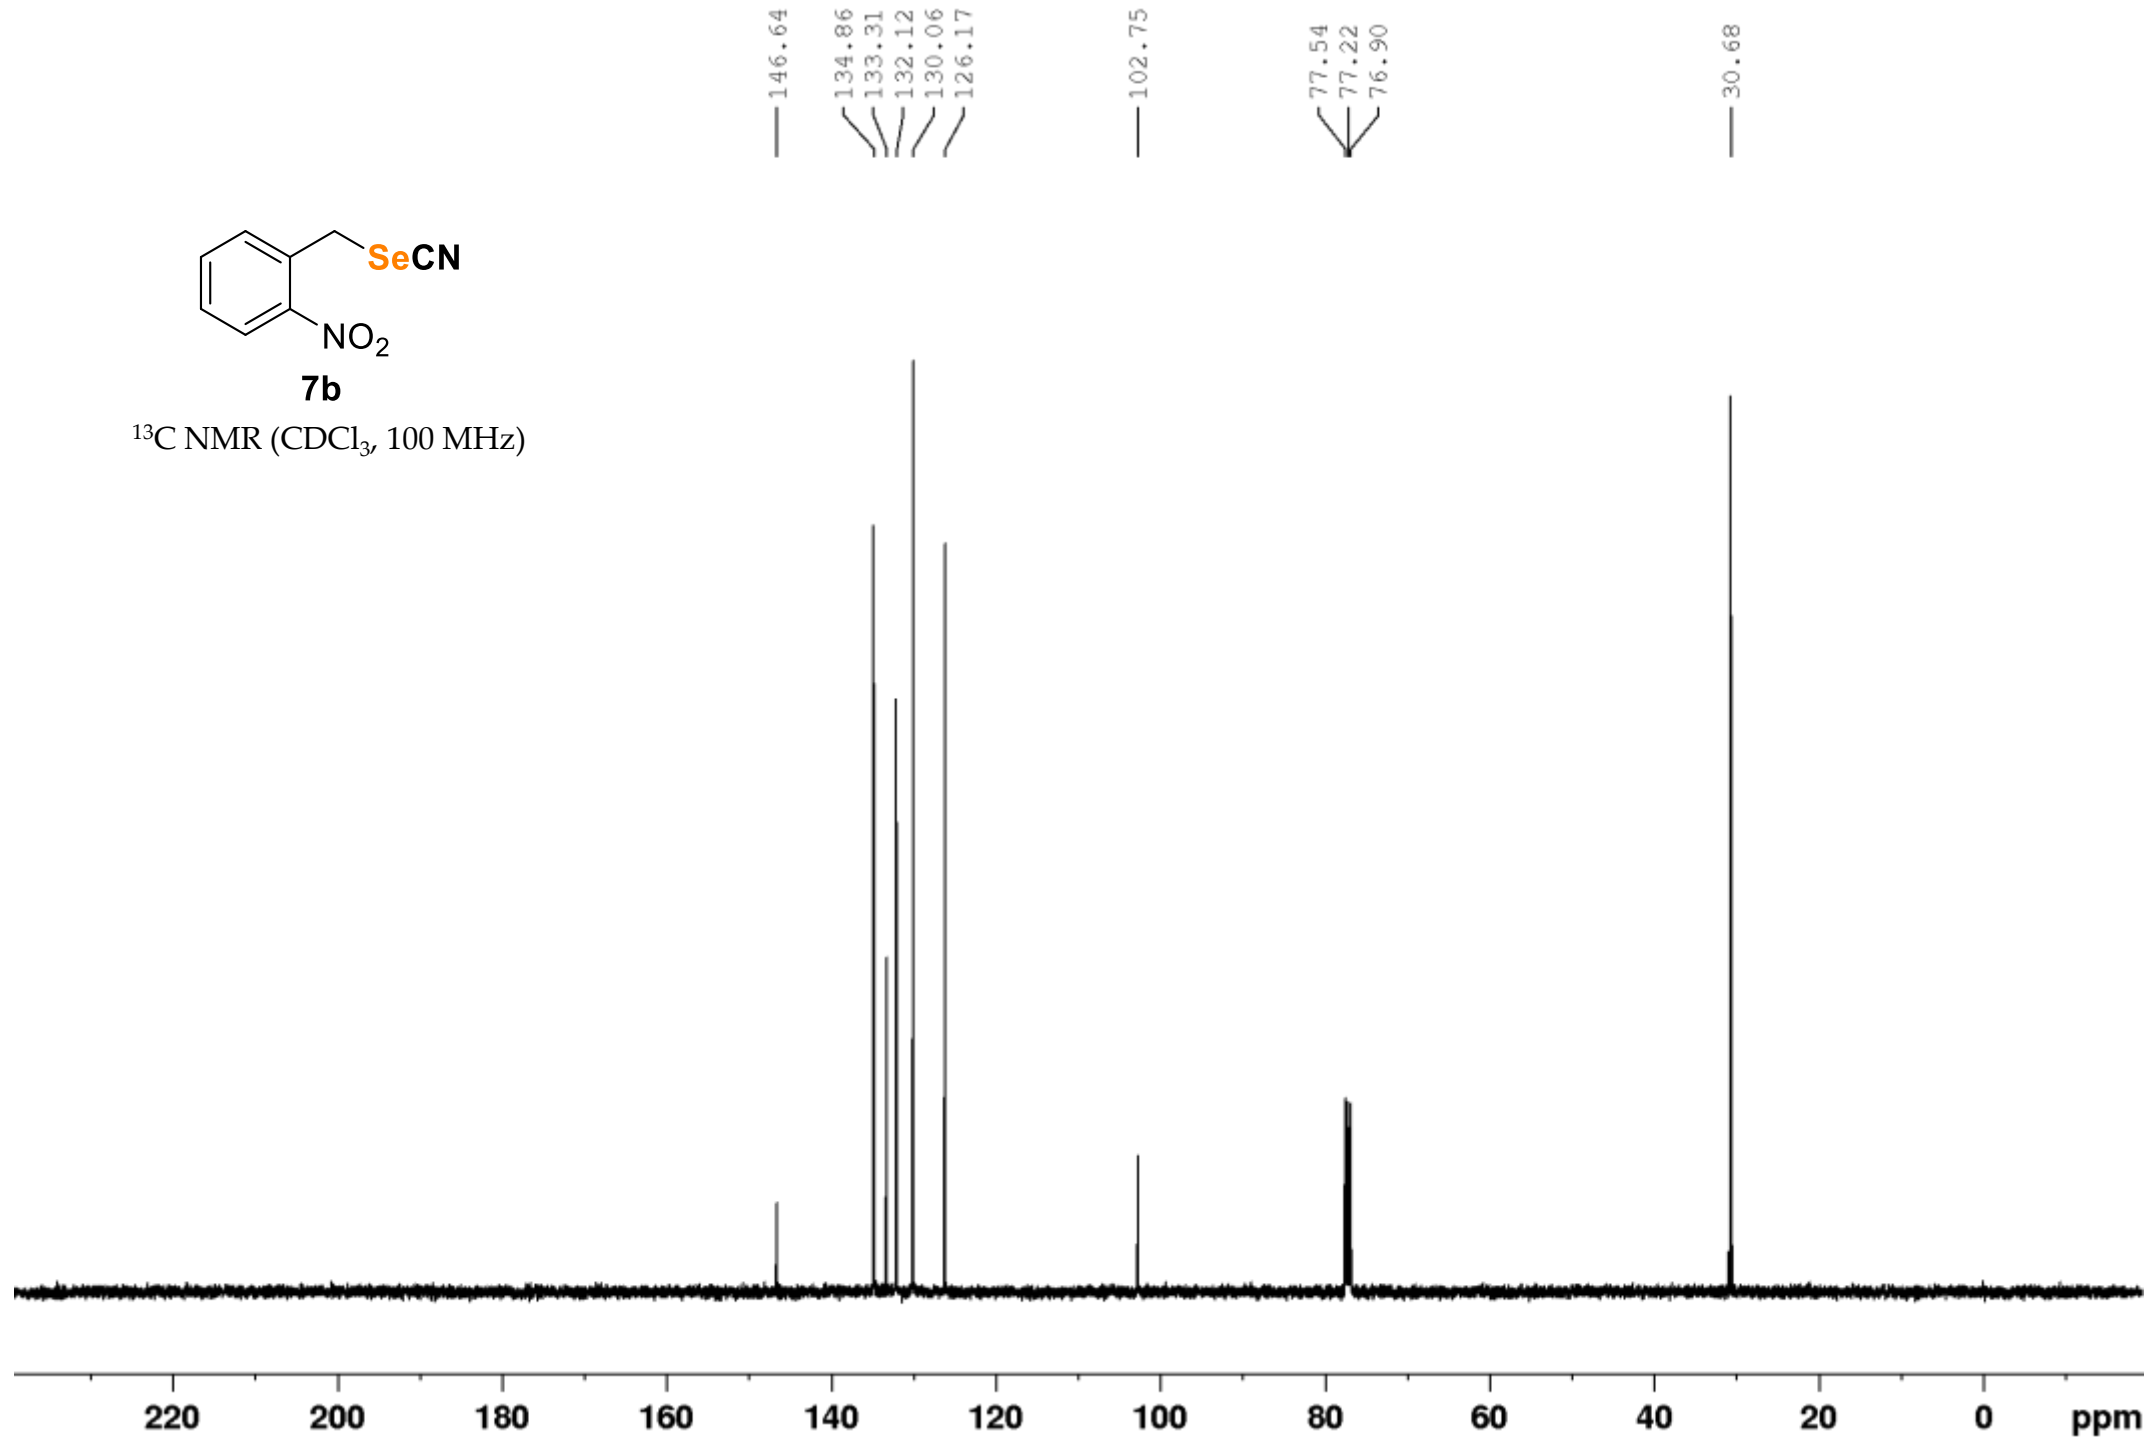

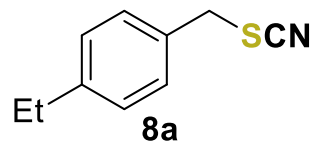

$^1\text{H}$  NMR ( $\text{CDCl}_3$ , 400 MHz)

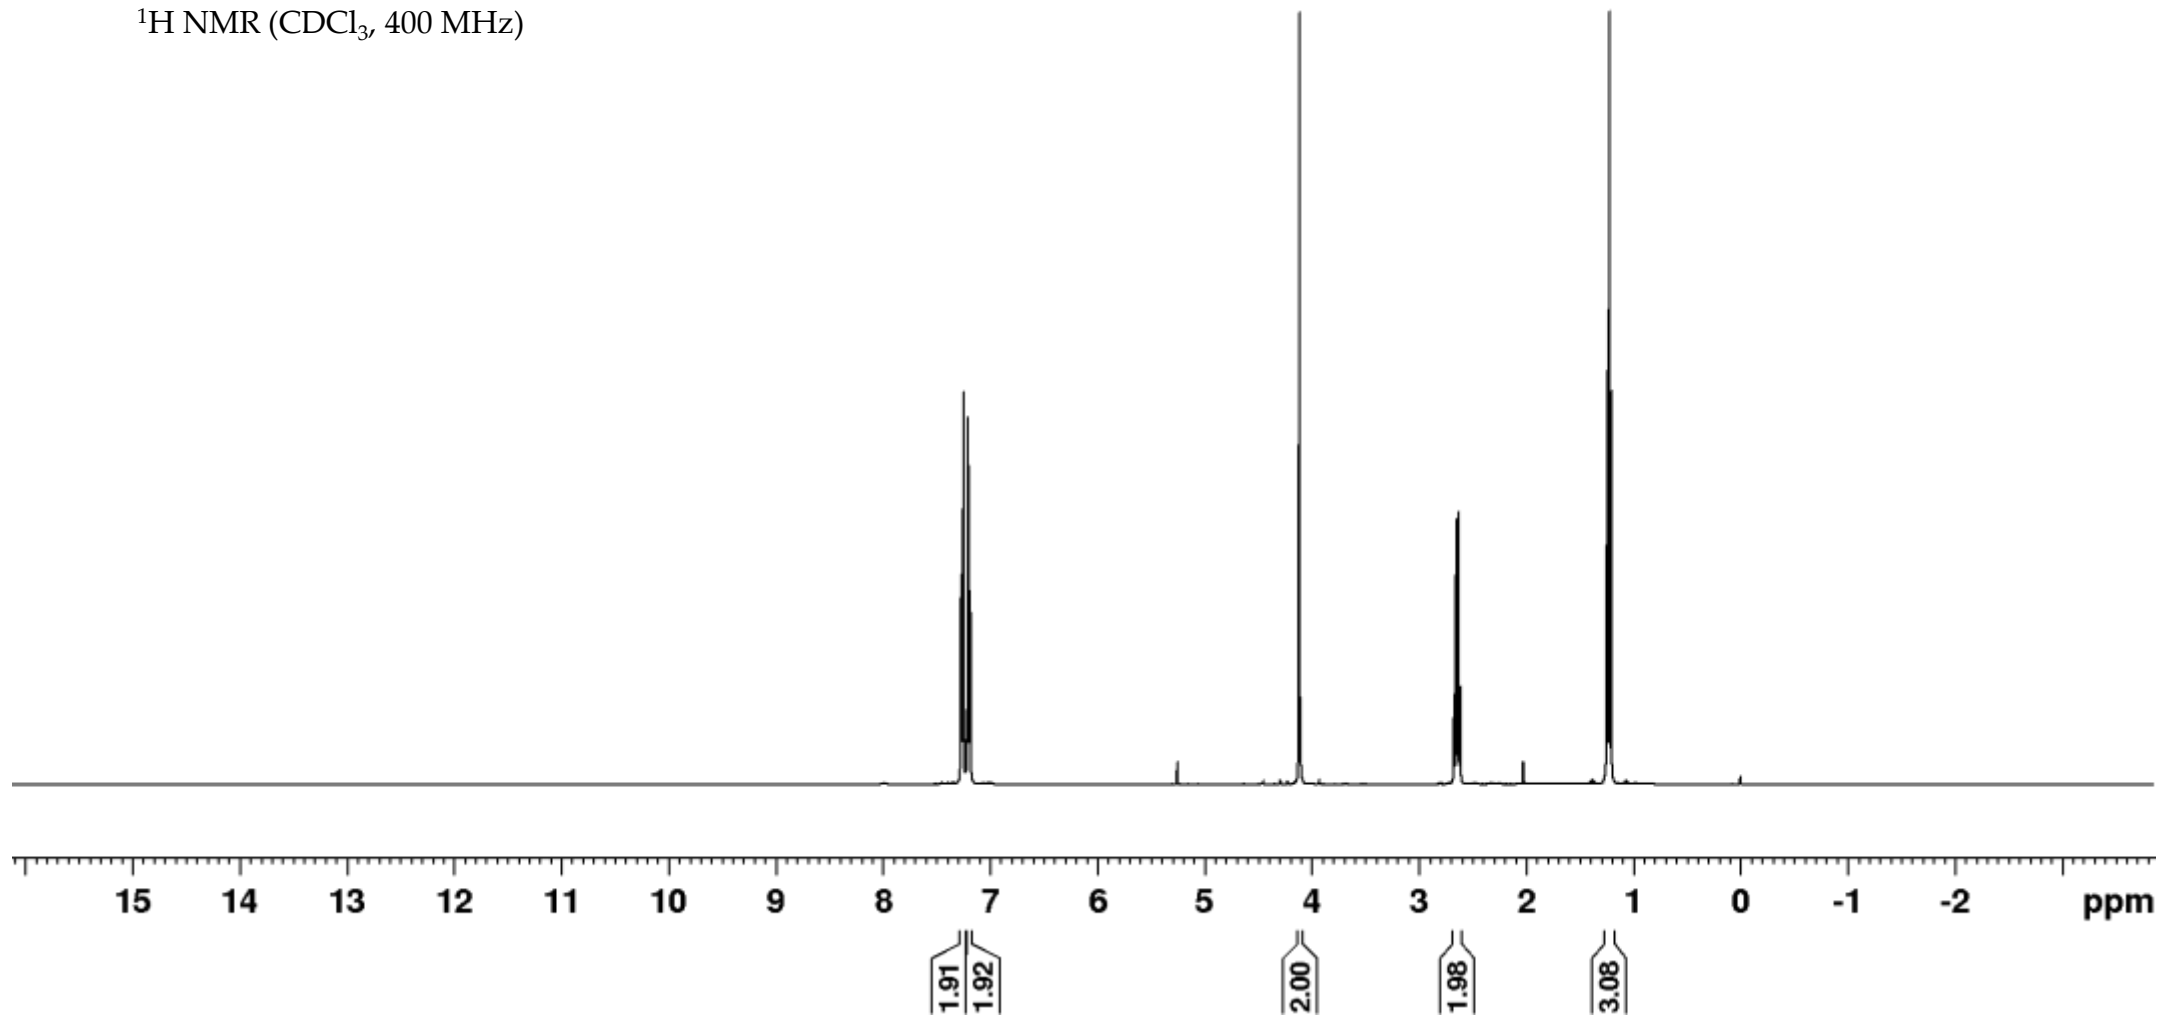



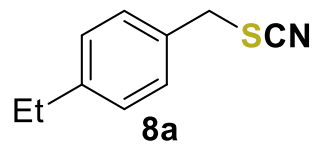

$^{13}\text{C}$  NMR ( $\text{CDCl}_3$ , 100 MHz)

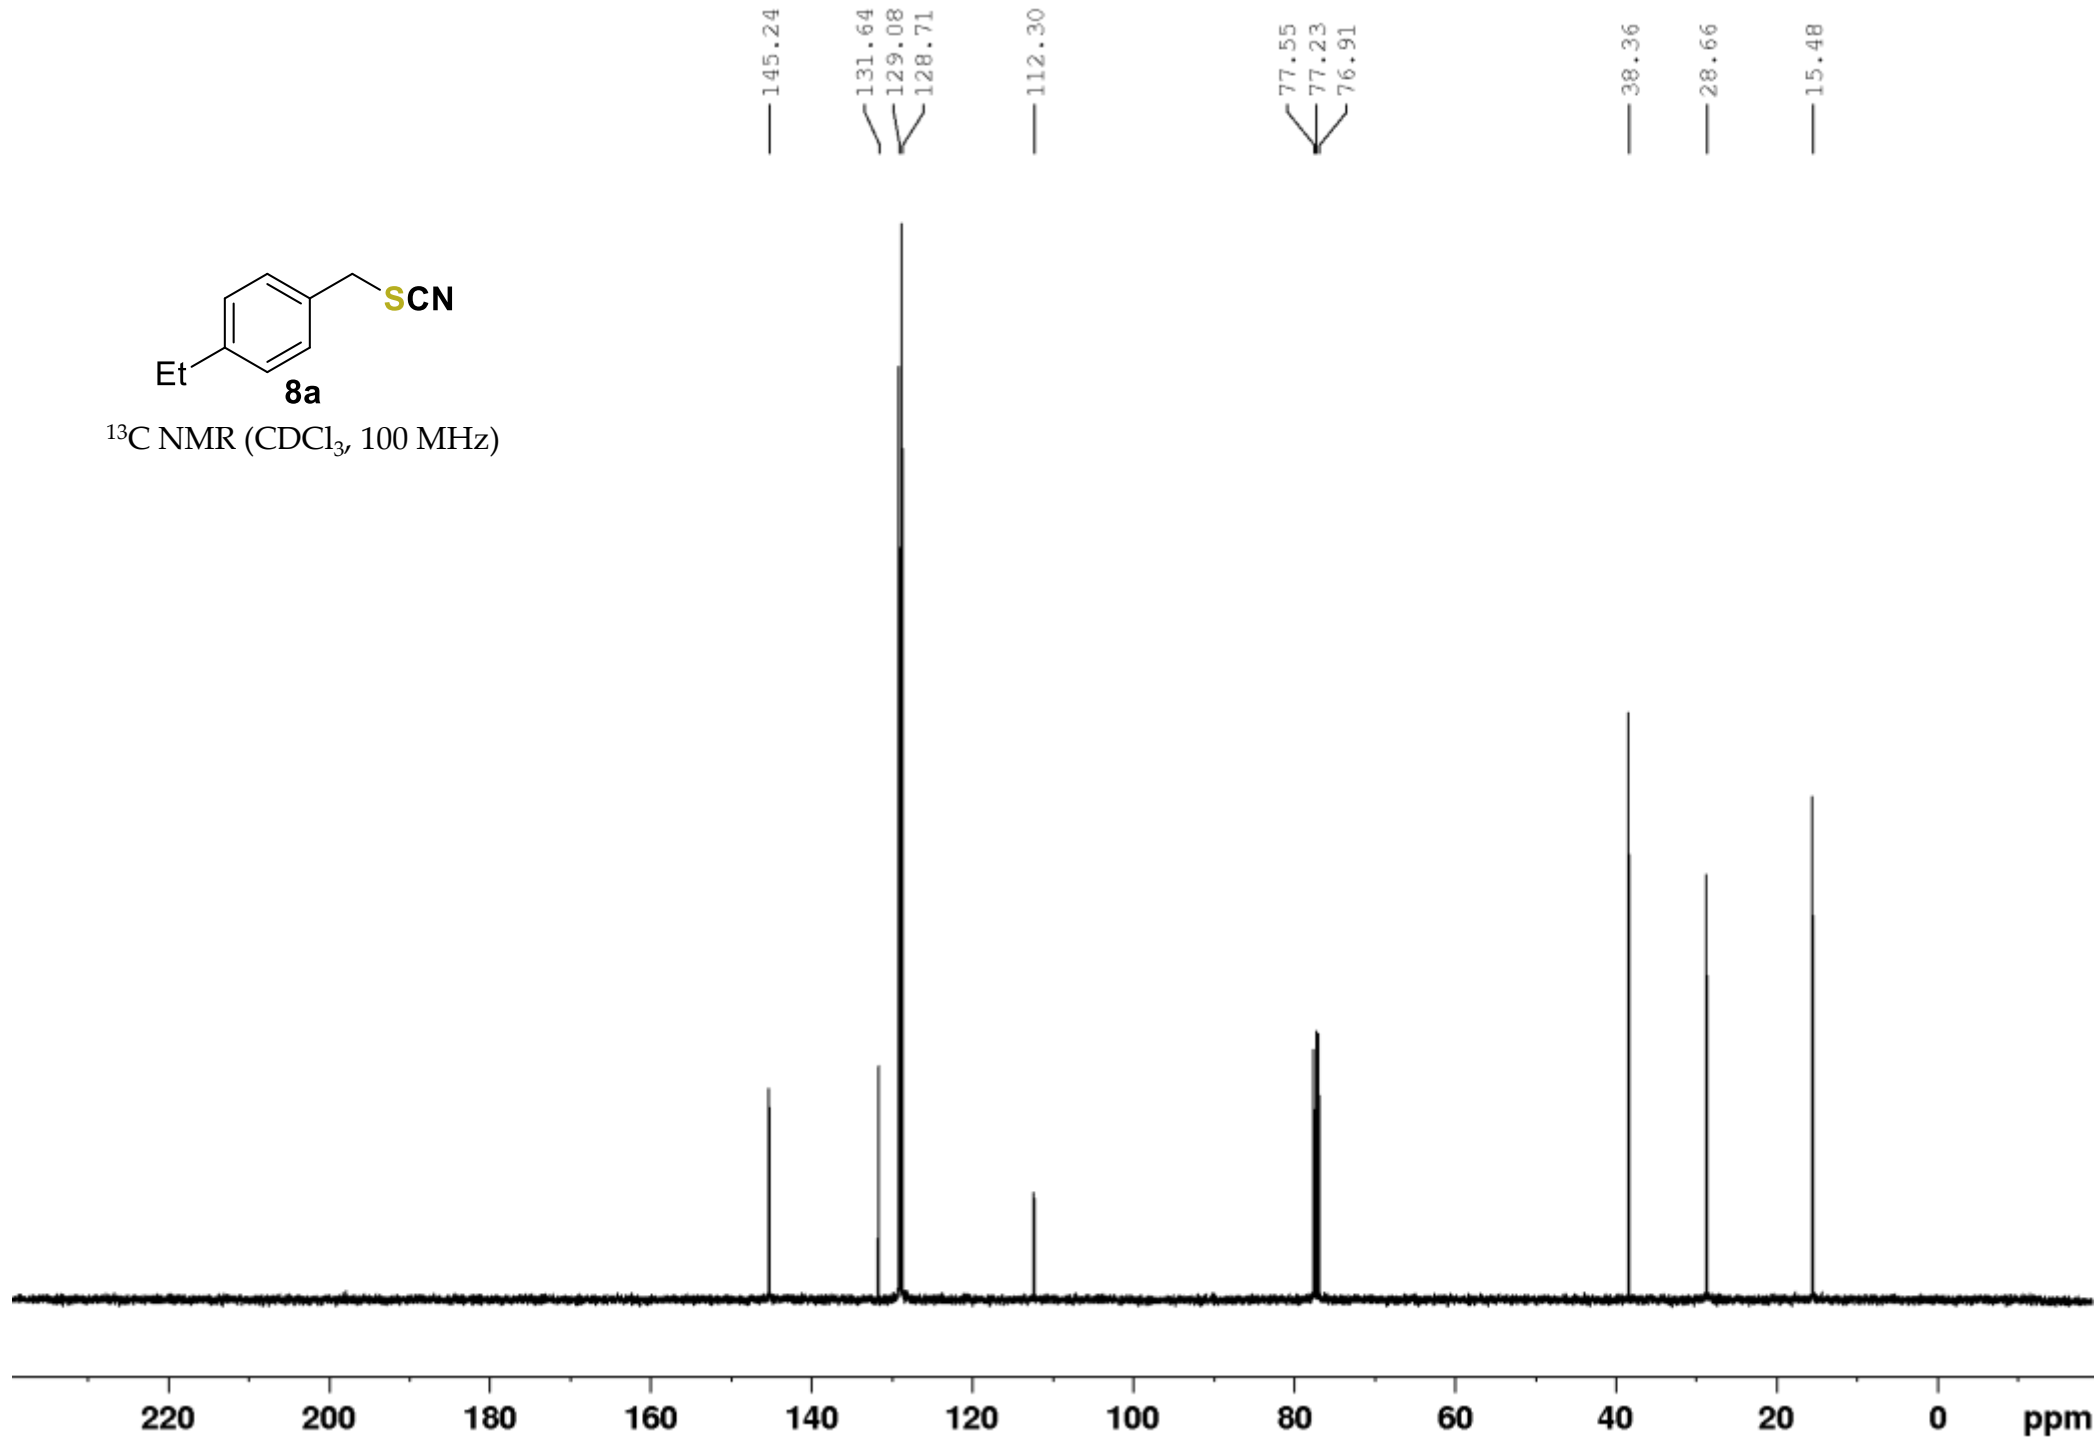

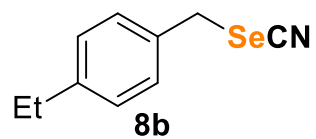

$^1\text{H}$  NMR ( $\text{CDCl}_3$ , 400 MHz)

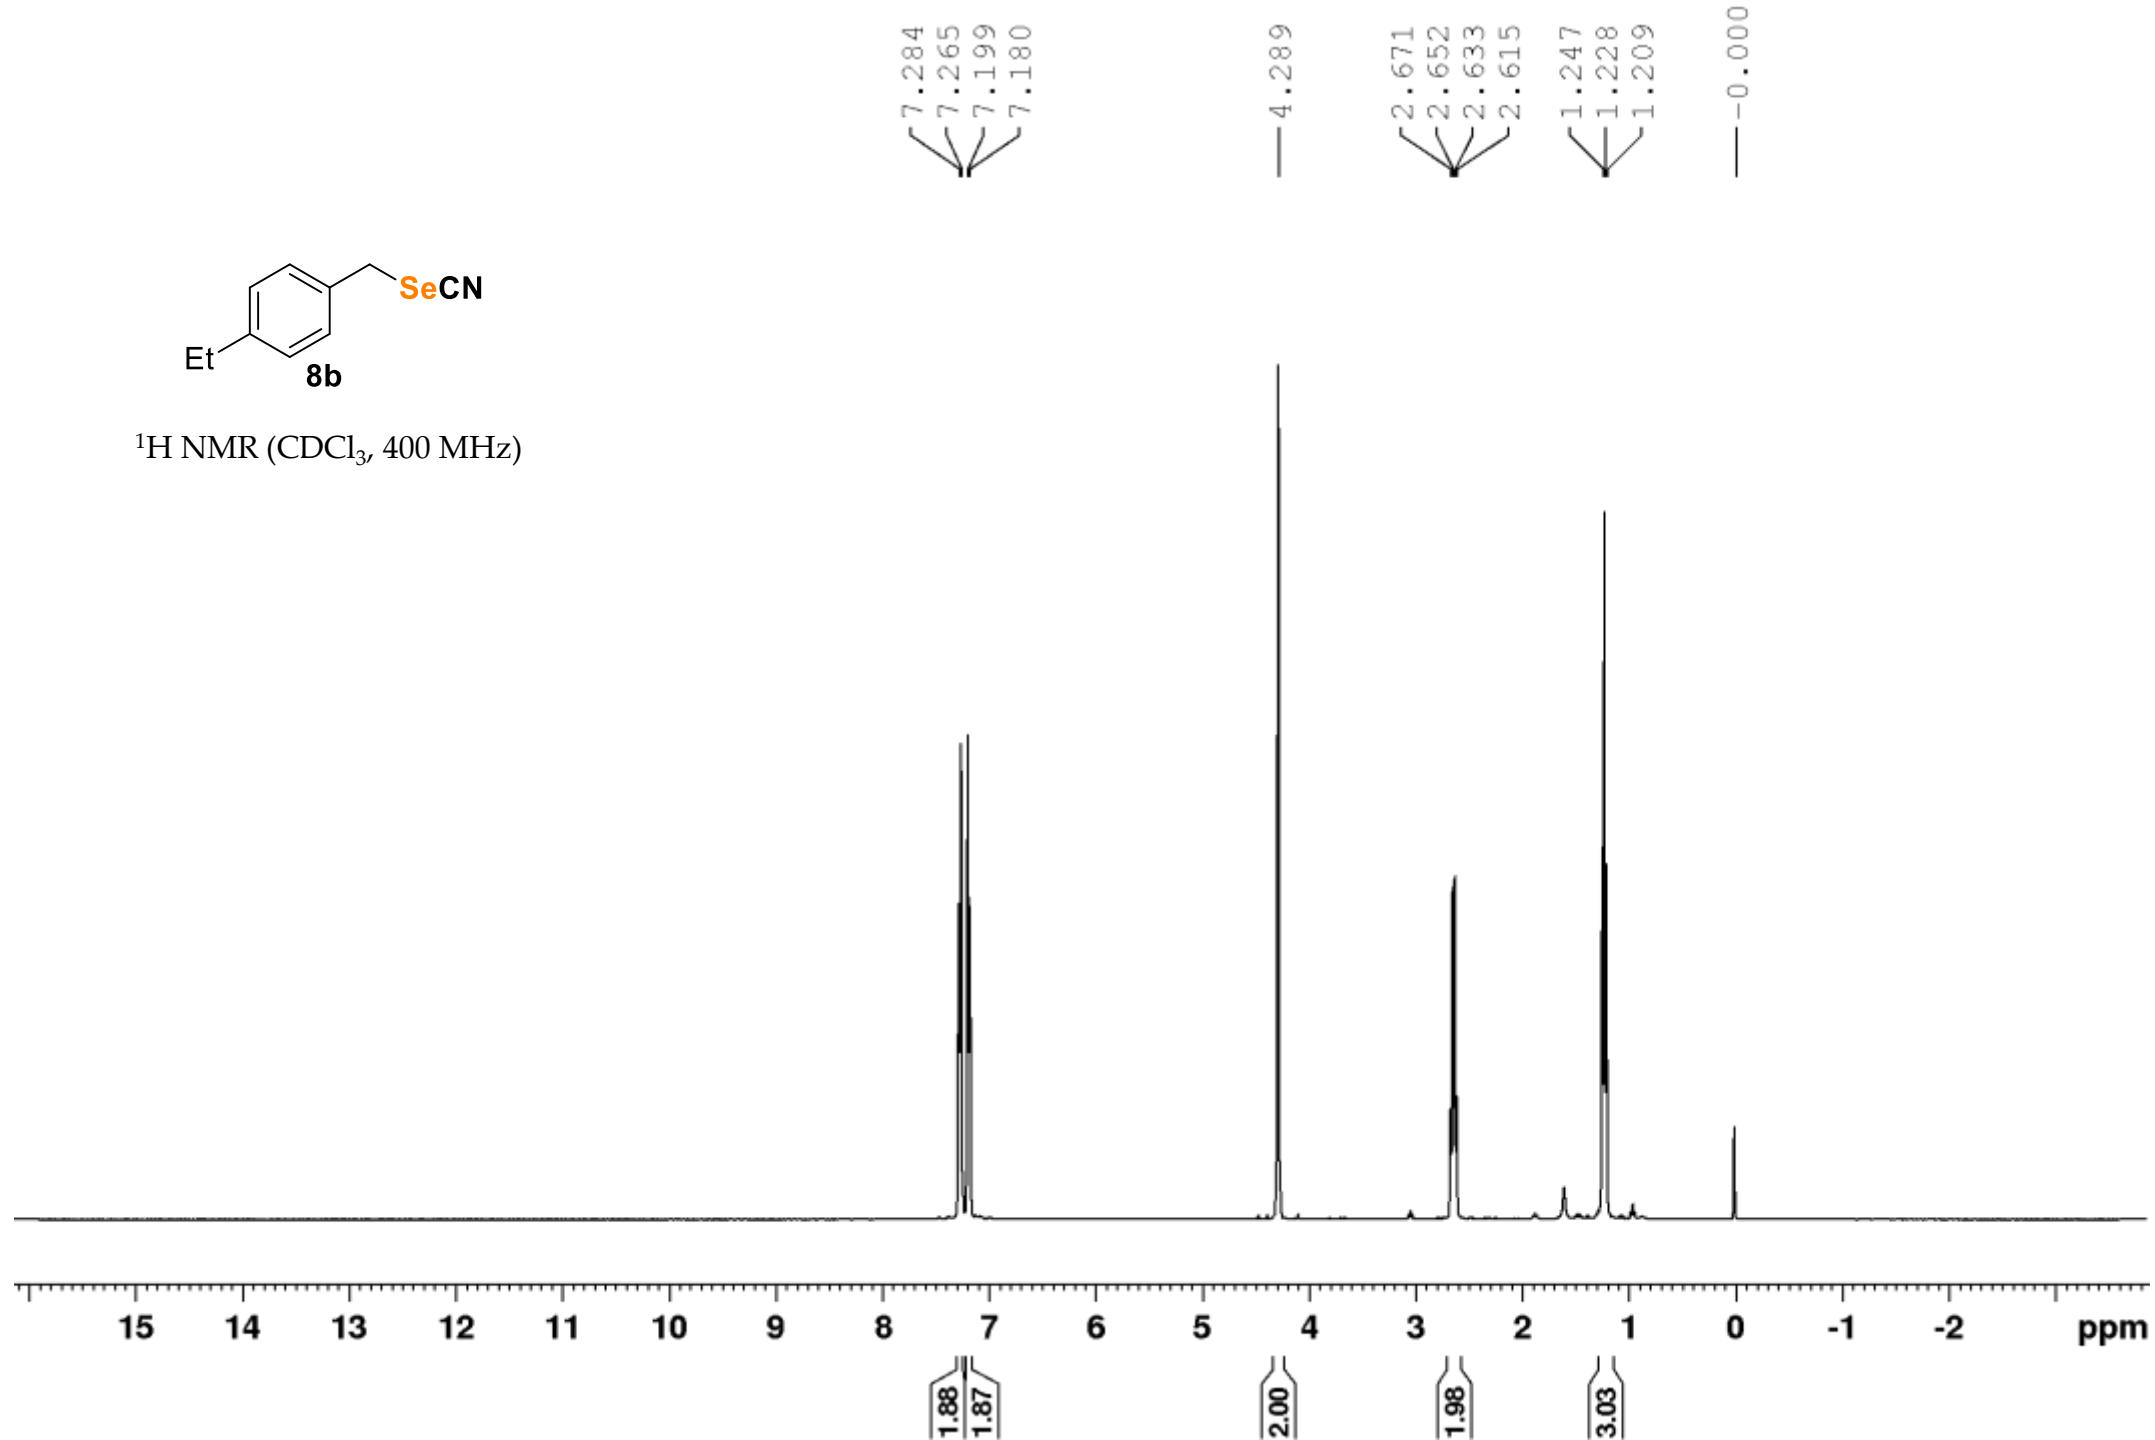



$^{13}\text{C}$  NMR ( $\text{CDCl}_3$ , 100 MHz)

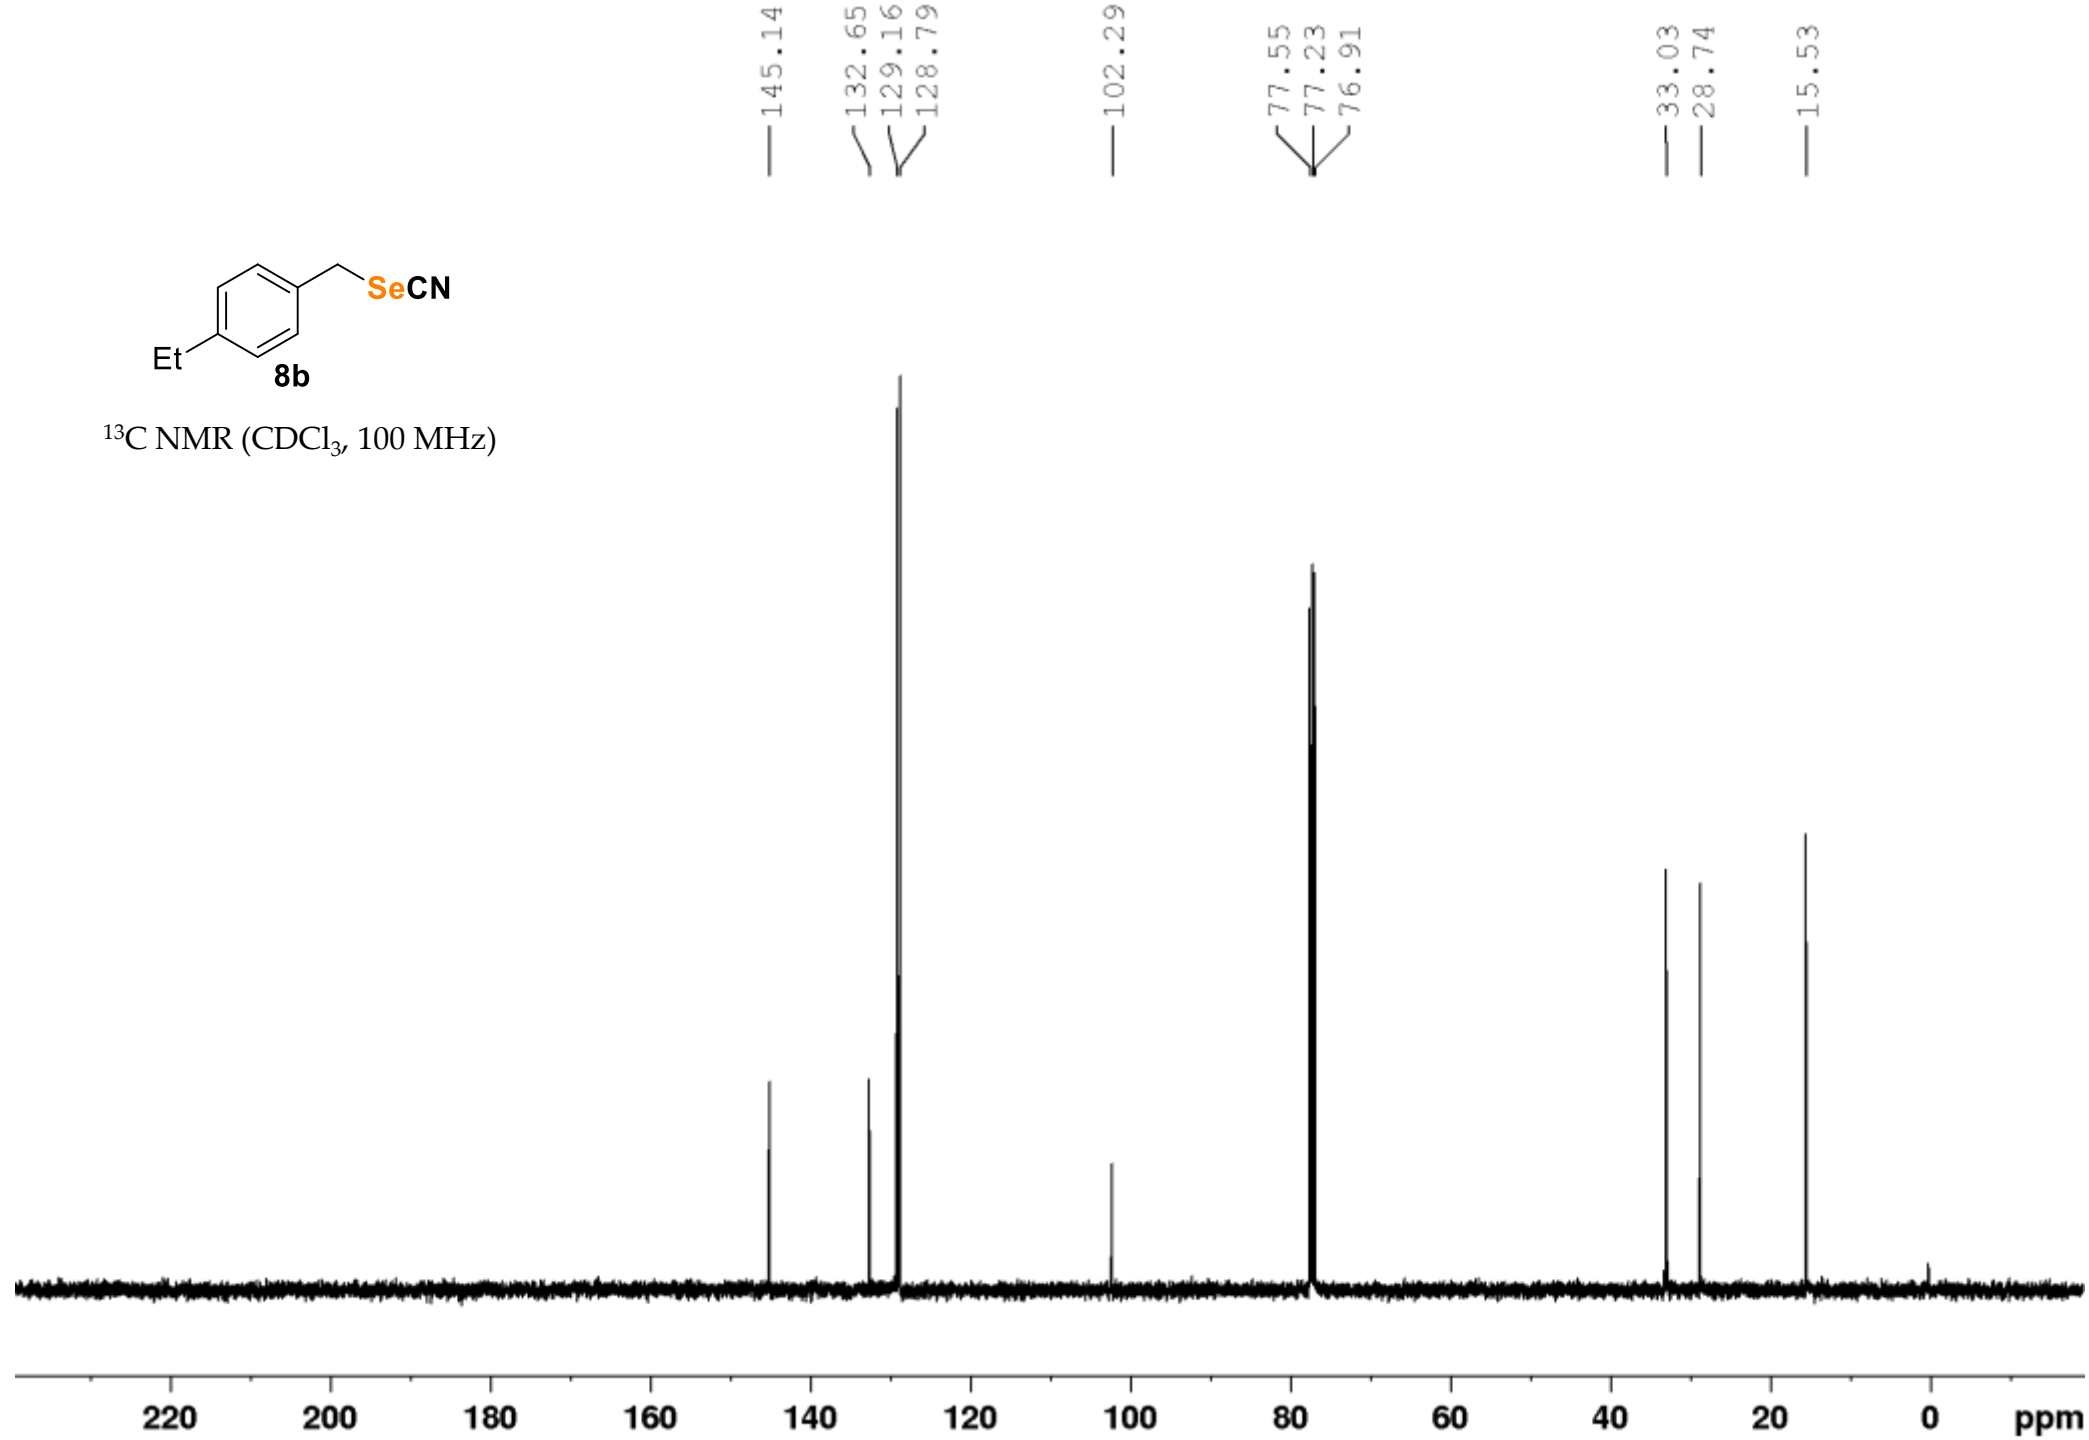

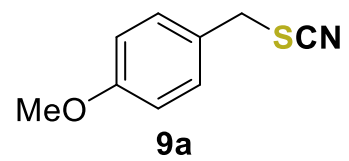

$^1\text{H}$  NMR ( $\text{CDCl}_3$ , 400 MHz)

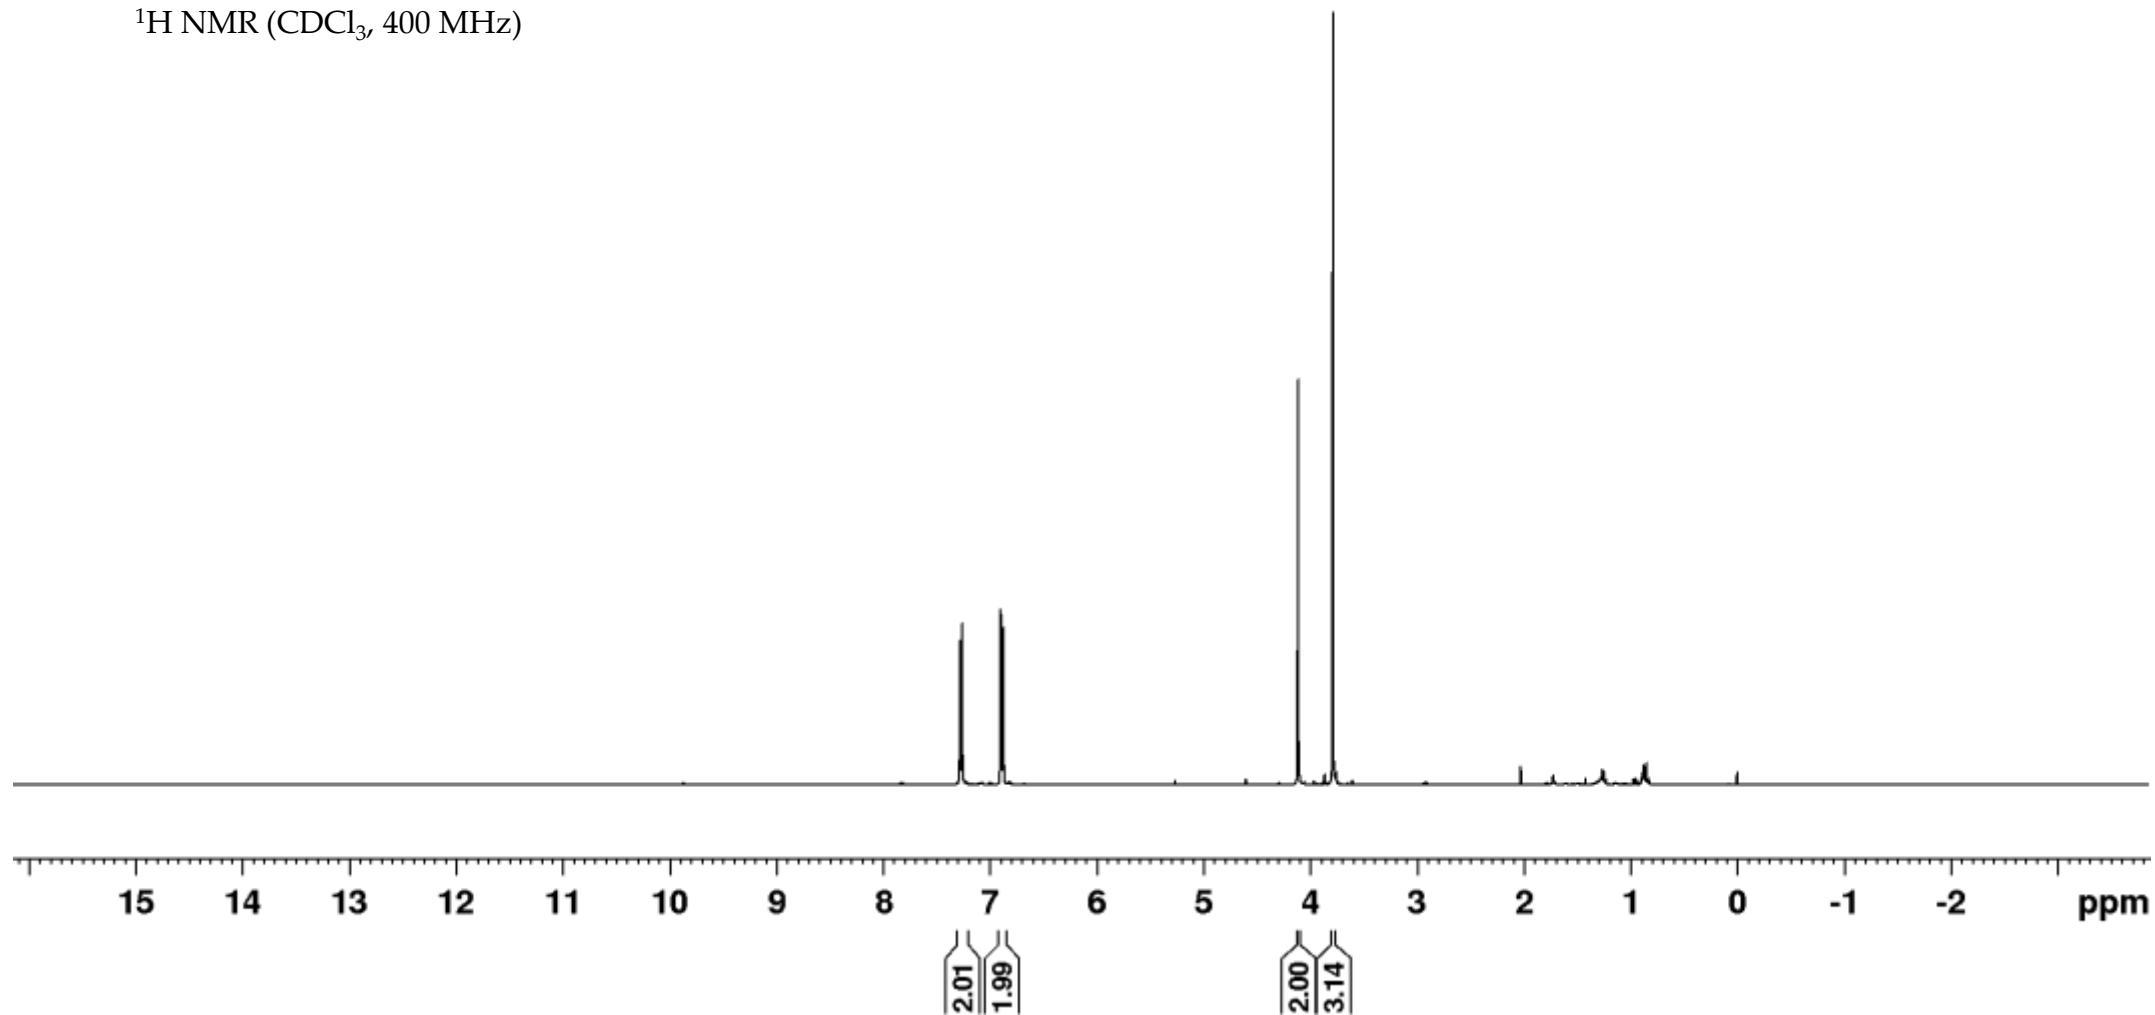

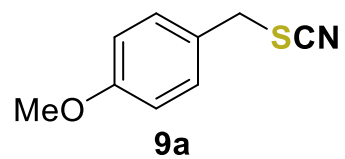

$^{13}\text{C}$  NMR ( $\text{CDCl}_3$ , 100 MHz)

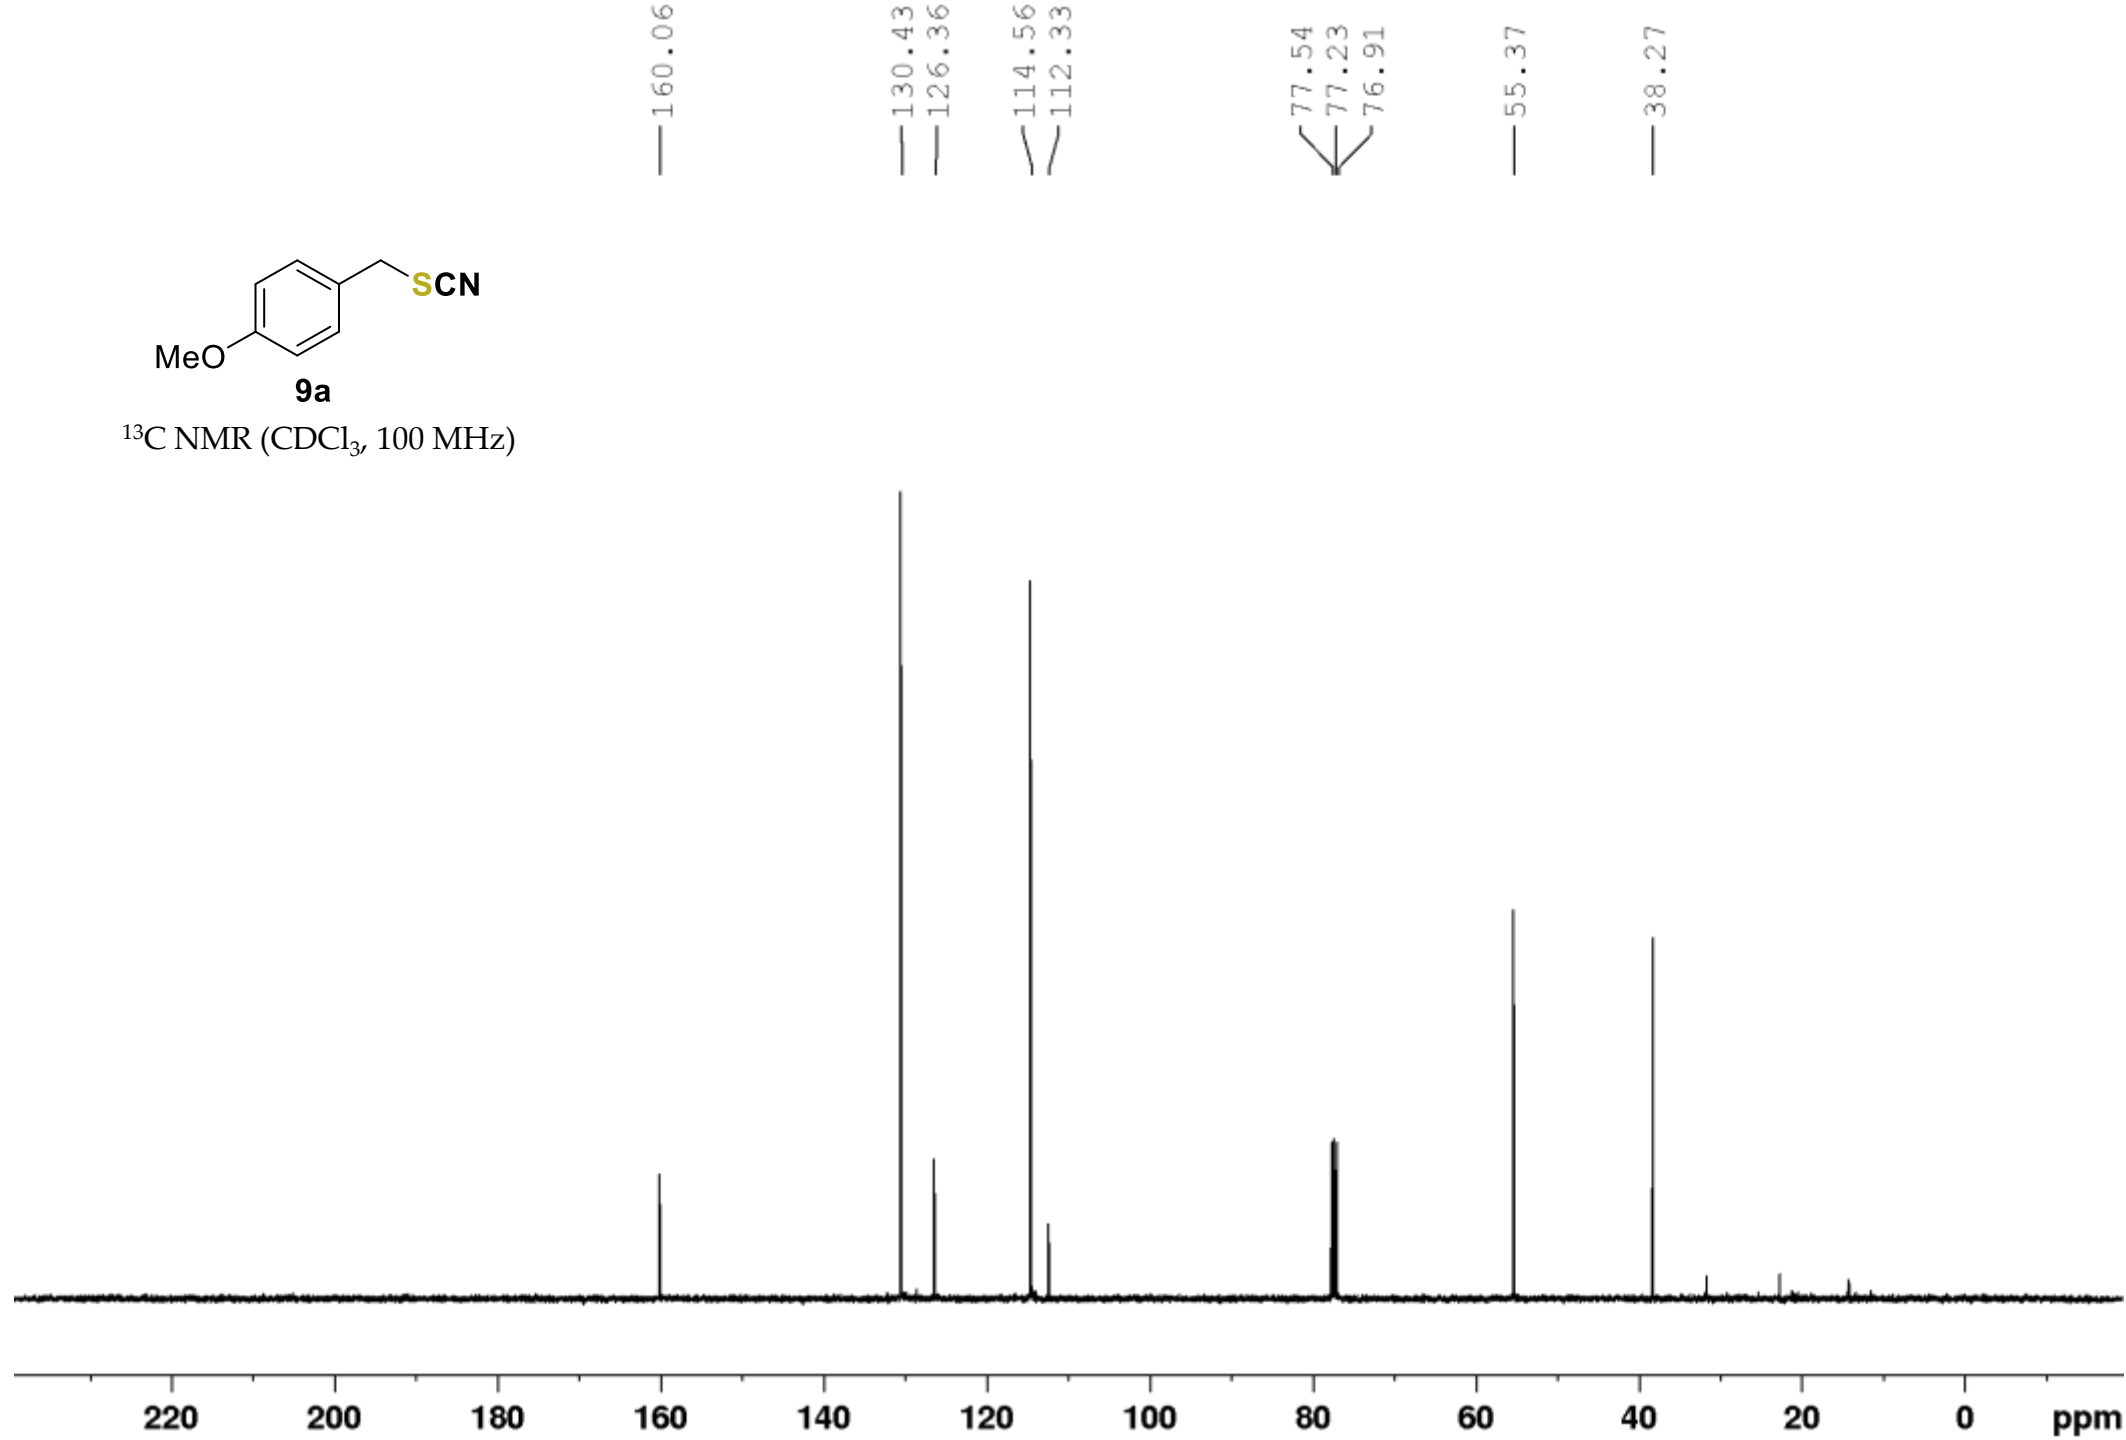

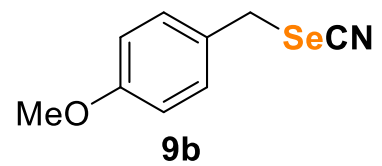

$^1\text{H}$  NMR ( $\text{CDCl}_3$ , 400 MHz)

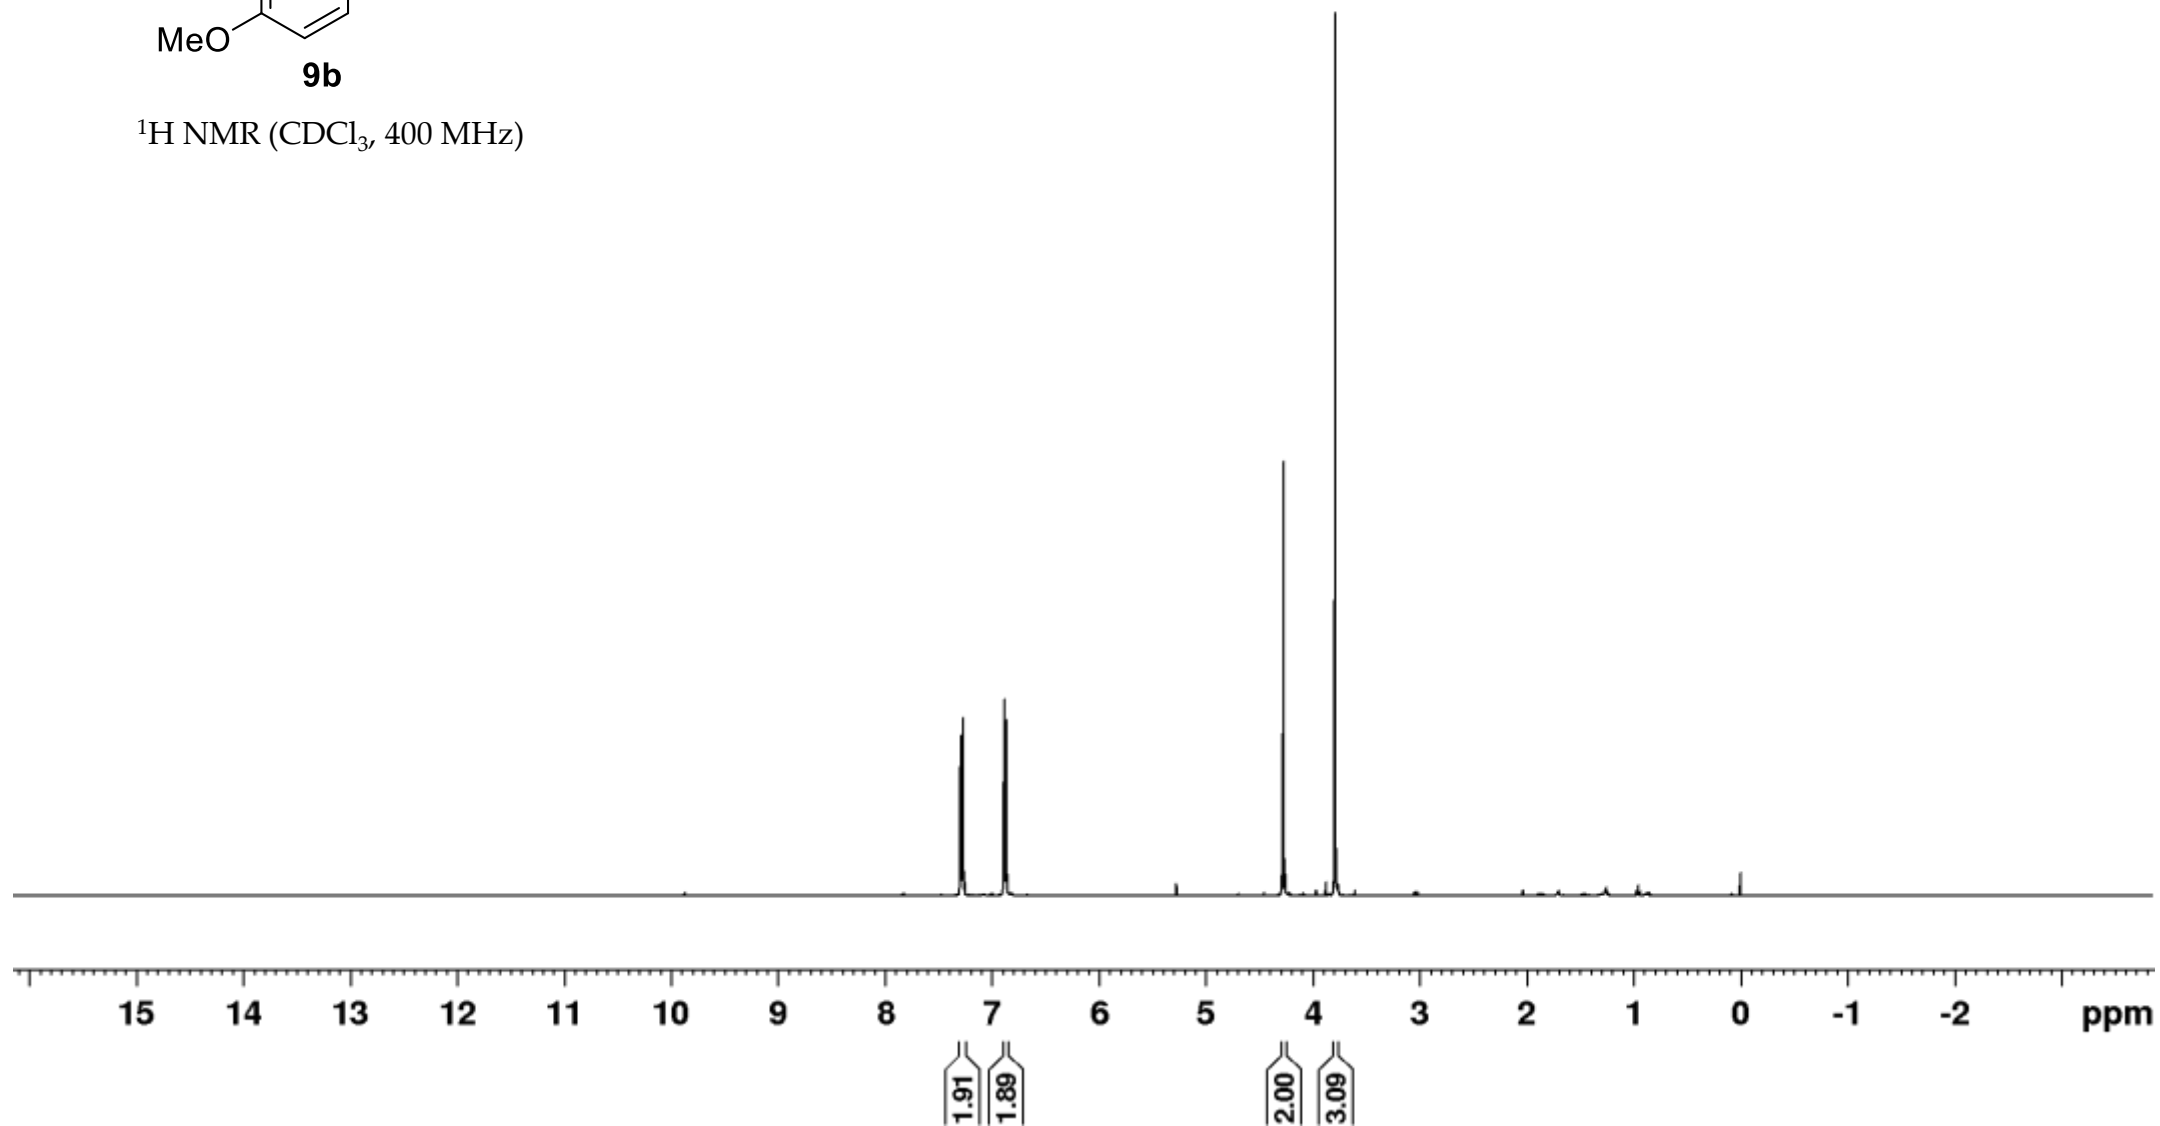

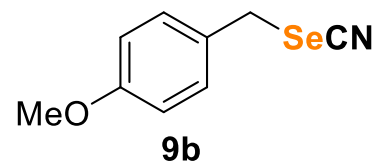

$^{13}\text{C}$  NMR ( $\text{CDCl}_3$ , 100 MHz)

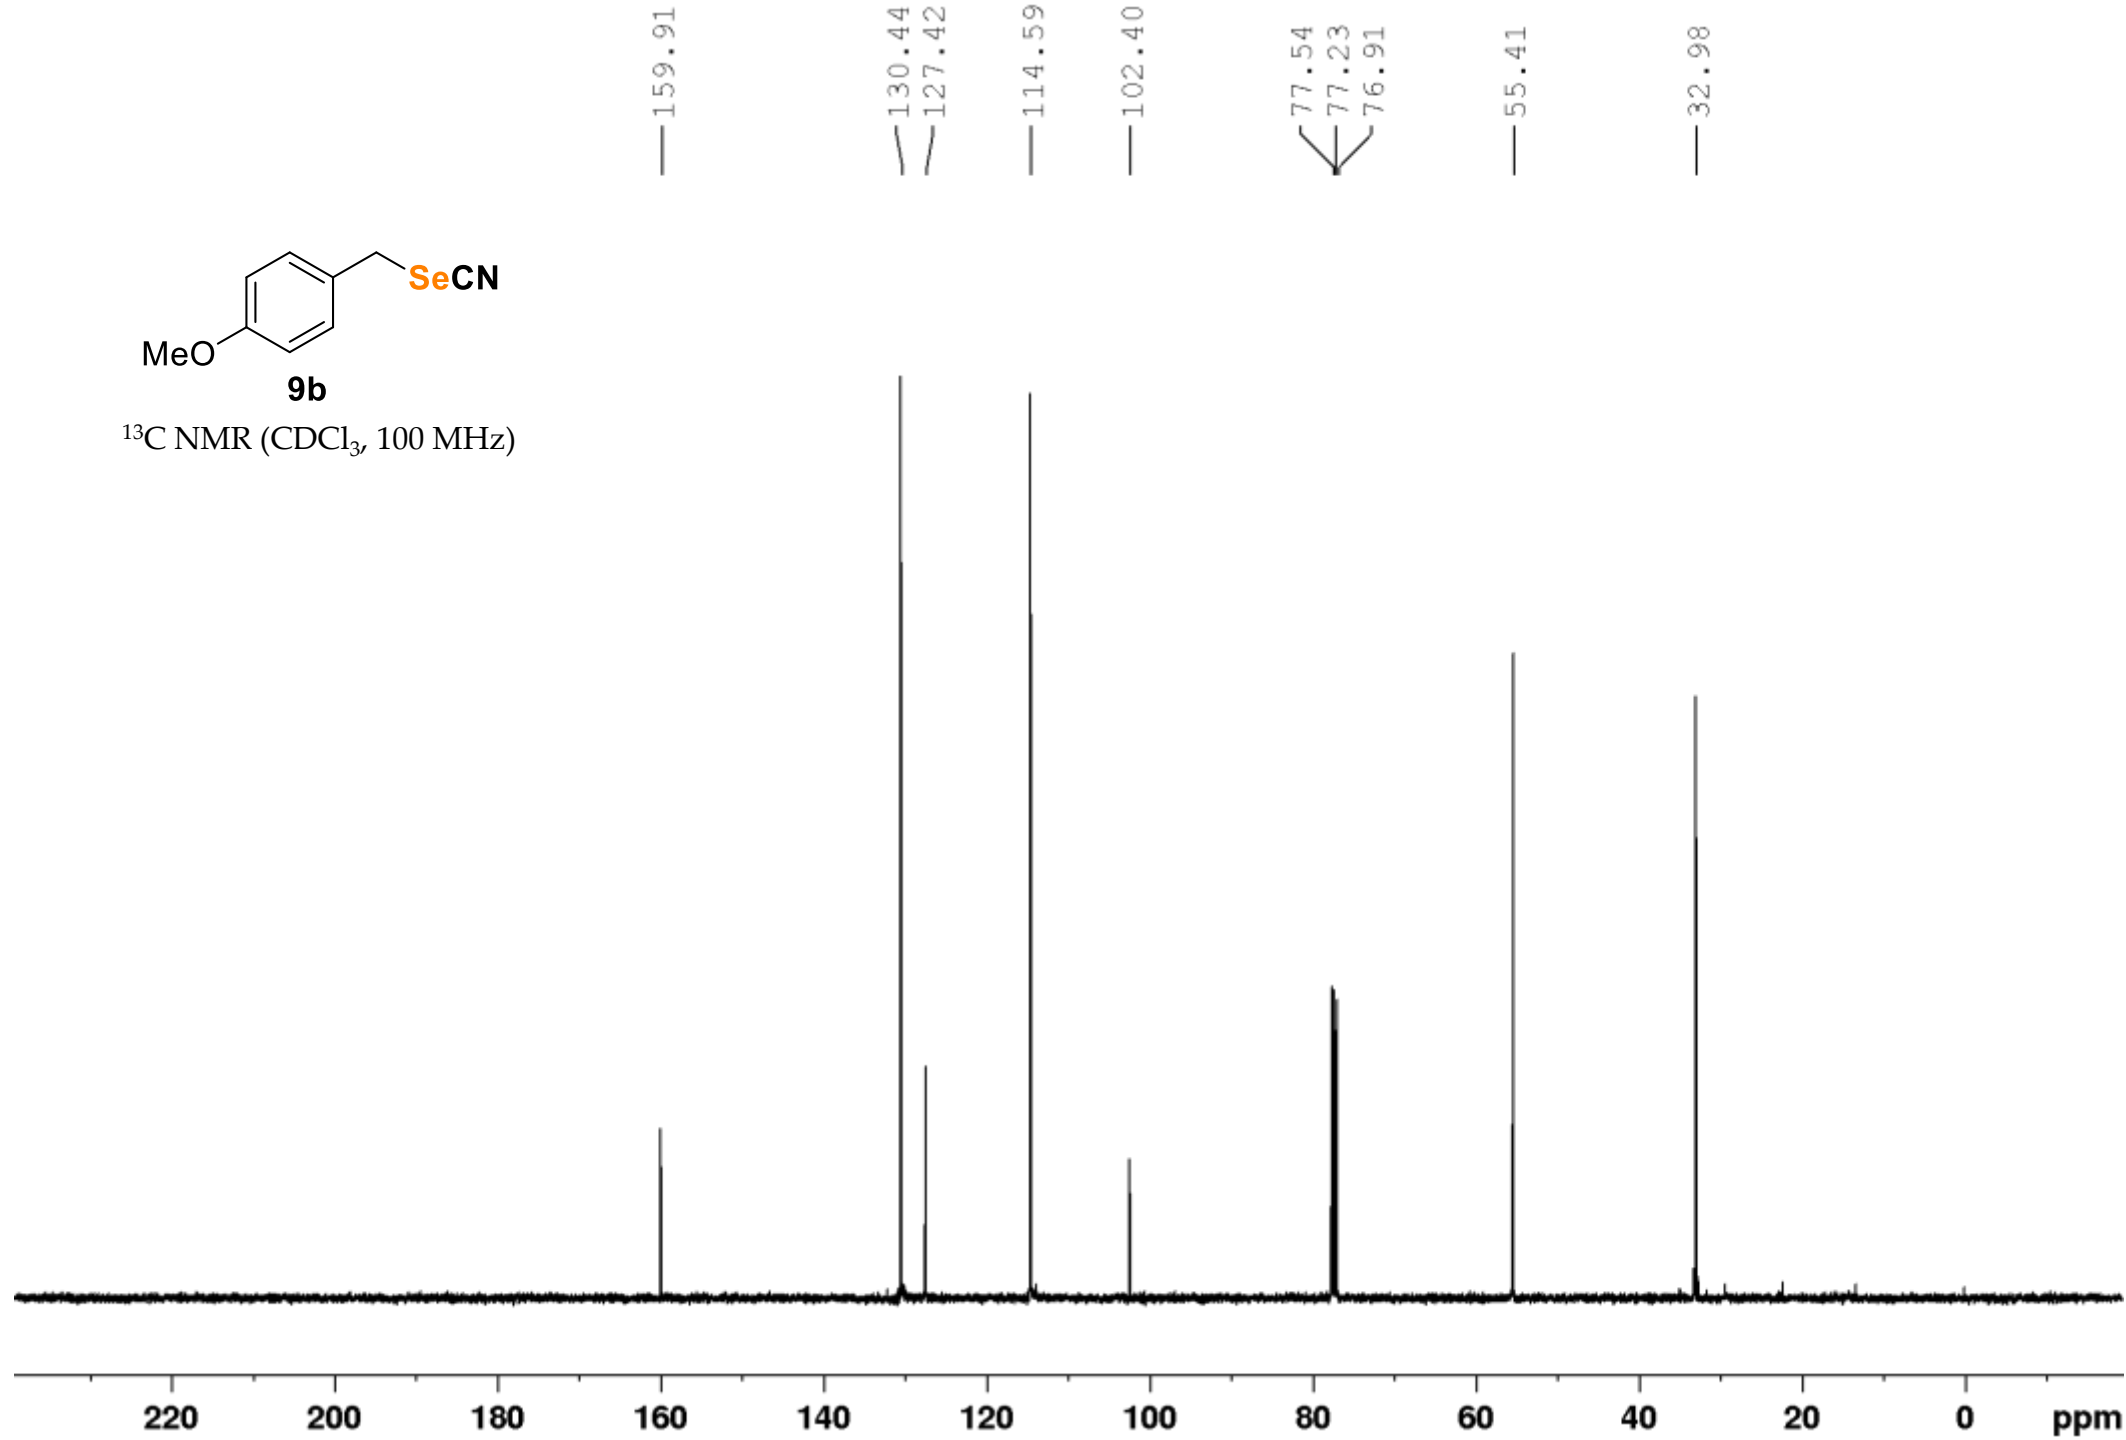

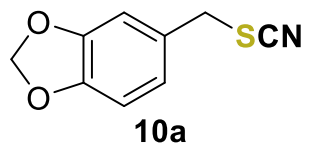

$^1\text{H}$  NMR ( $\text{CDCl}_3$ , 400 MHz)

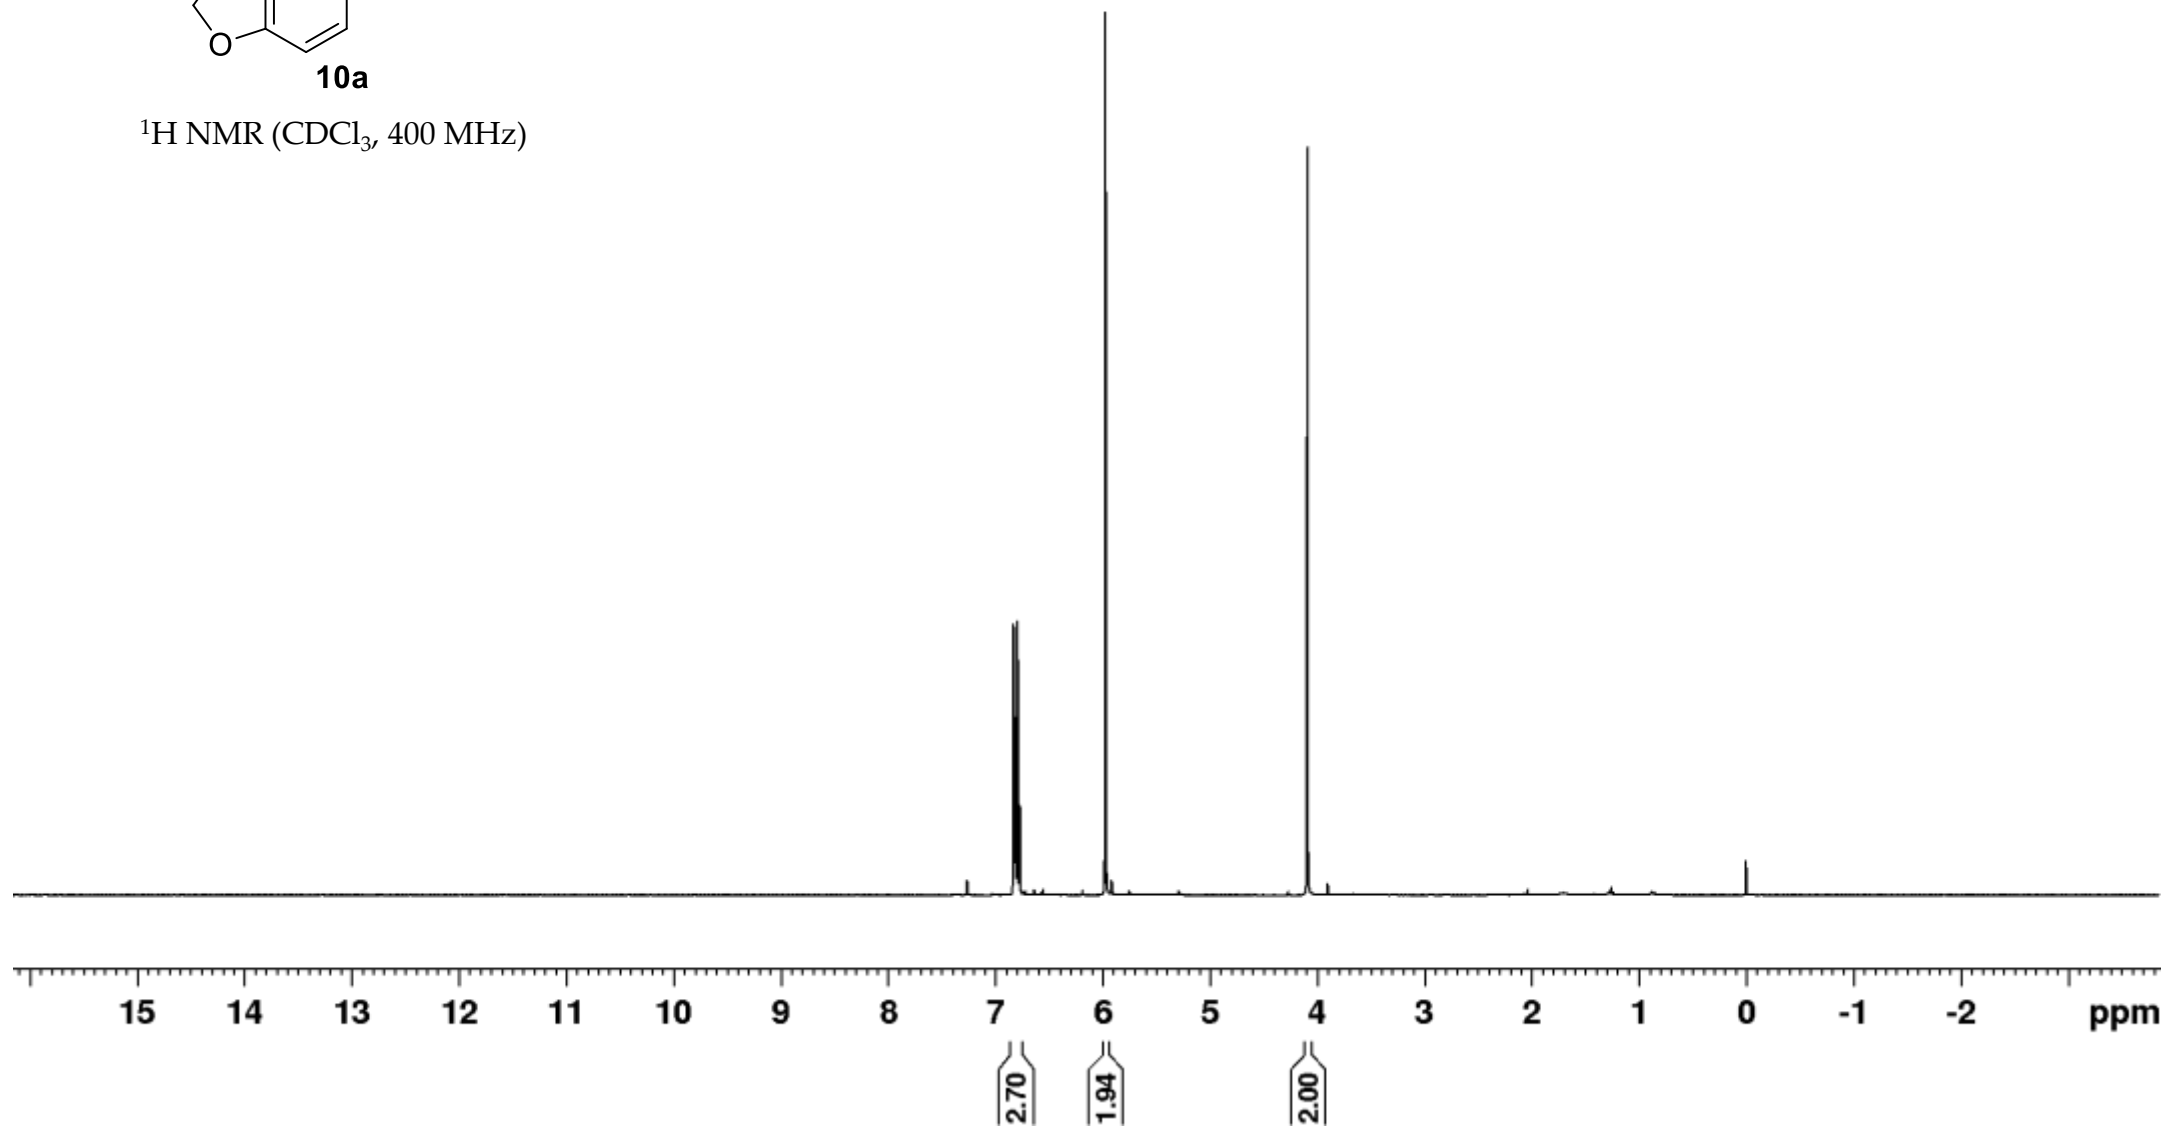



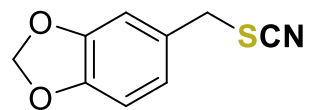

**10a**

$^{13}\text{C}$  NMR ( $\text{CDCl}_3$ , 100 MHz)

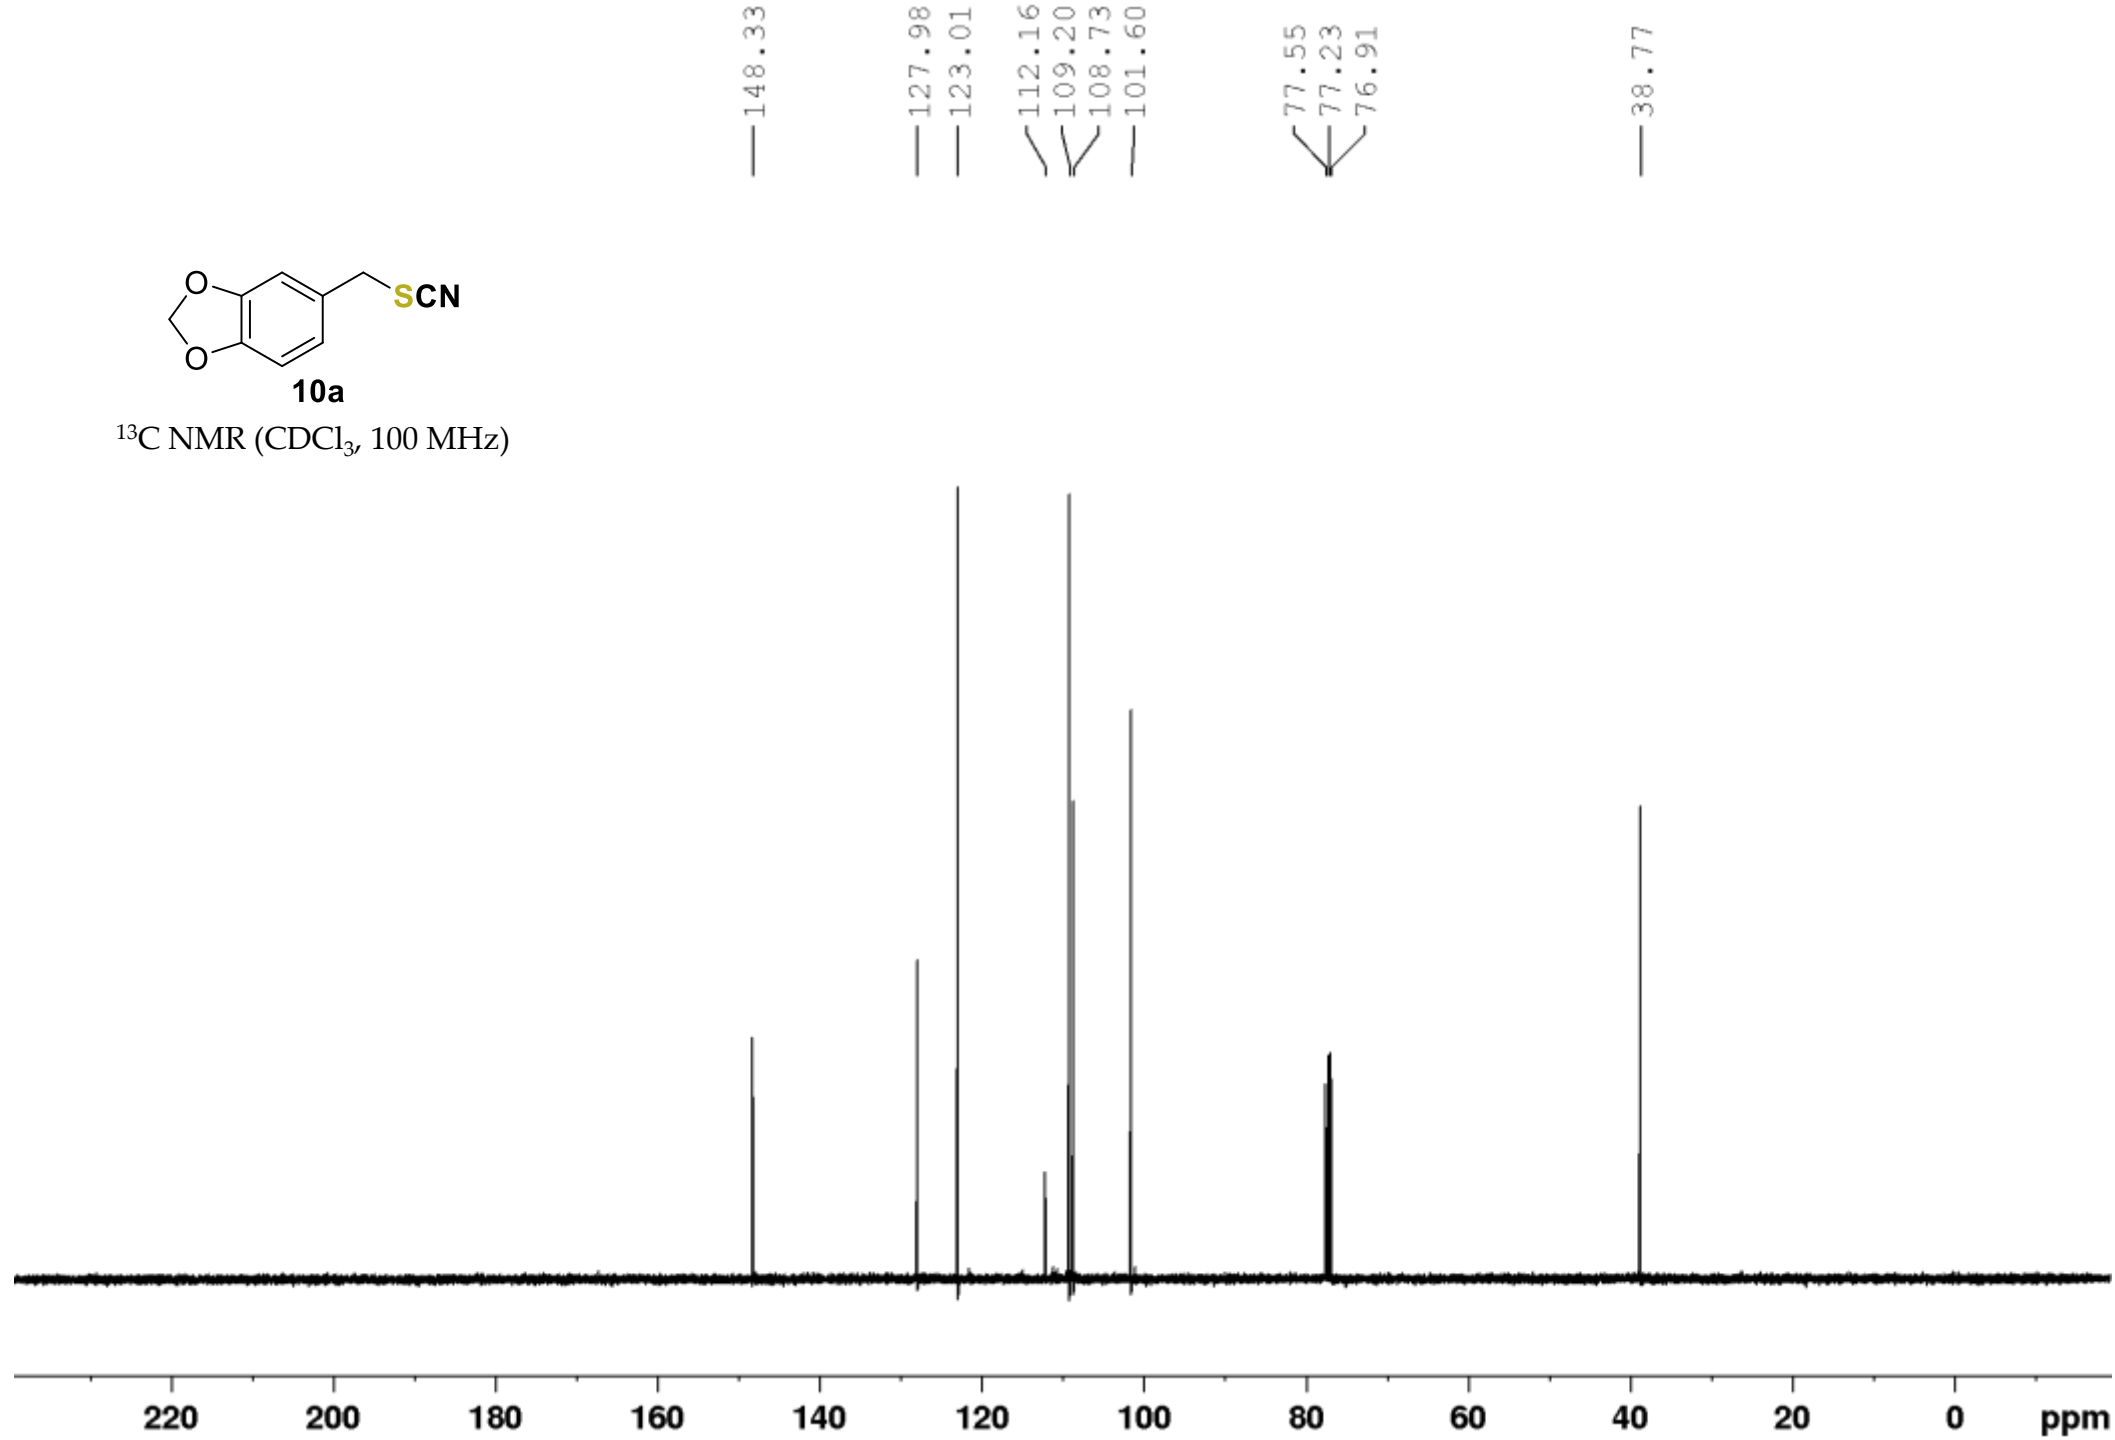

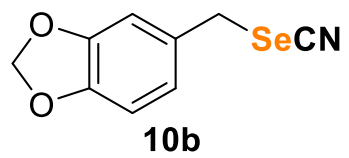

$^1\text{H}$  NMR ( $\text{CDCl}_3$ , 400 MHz)

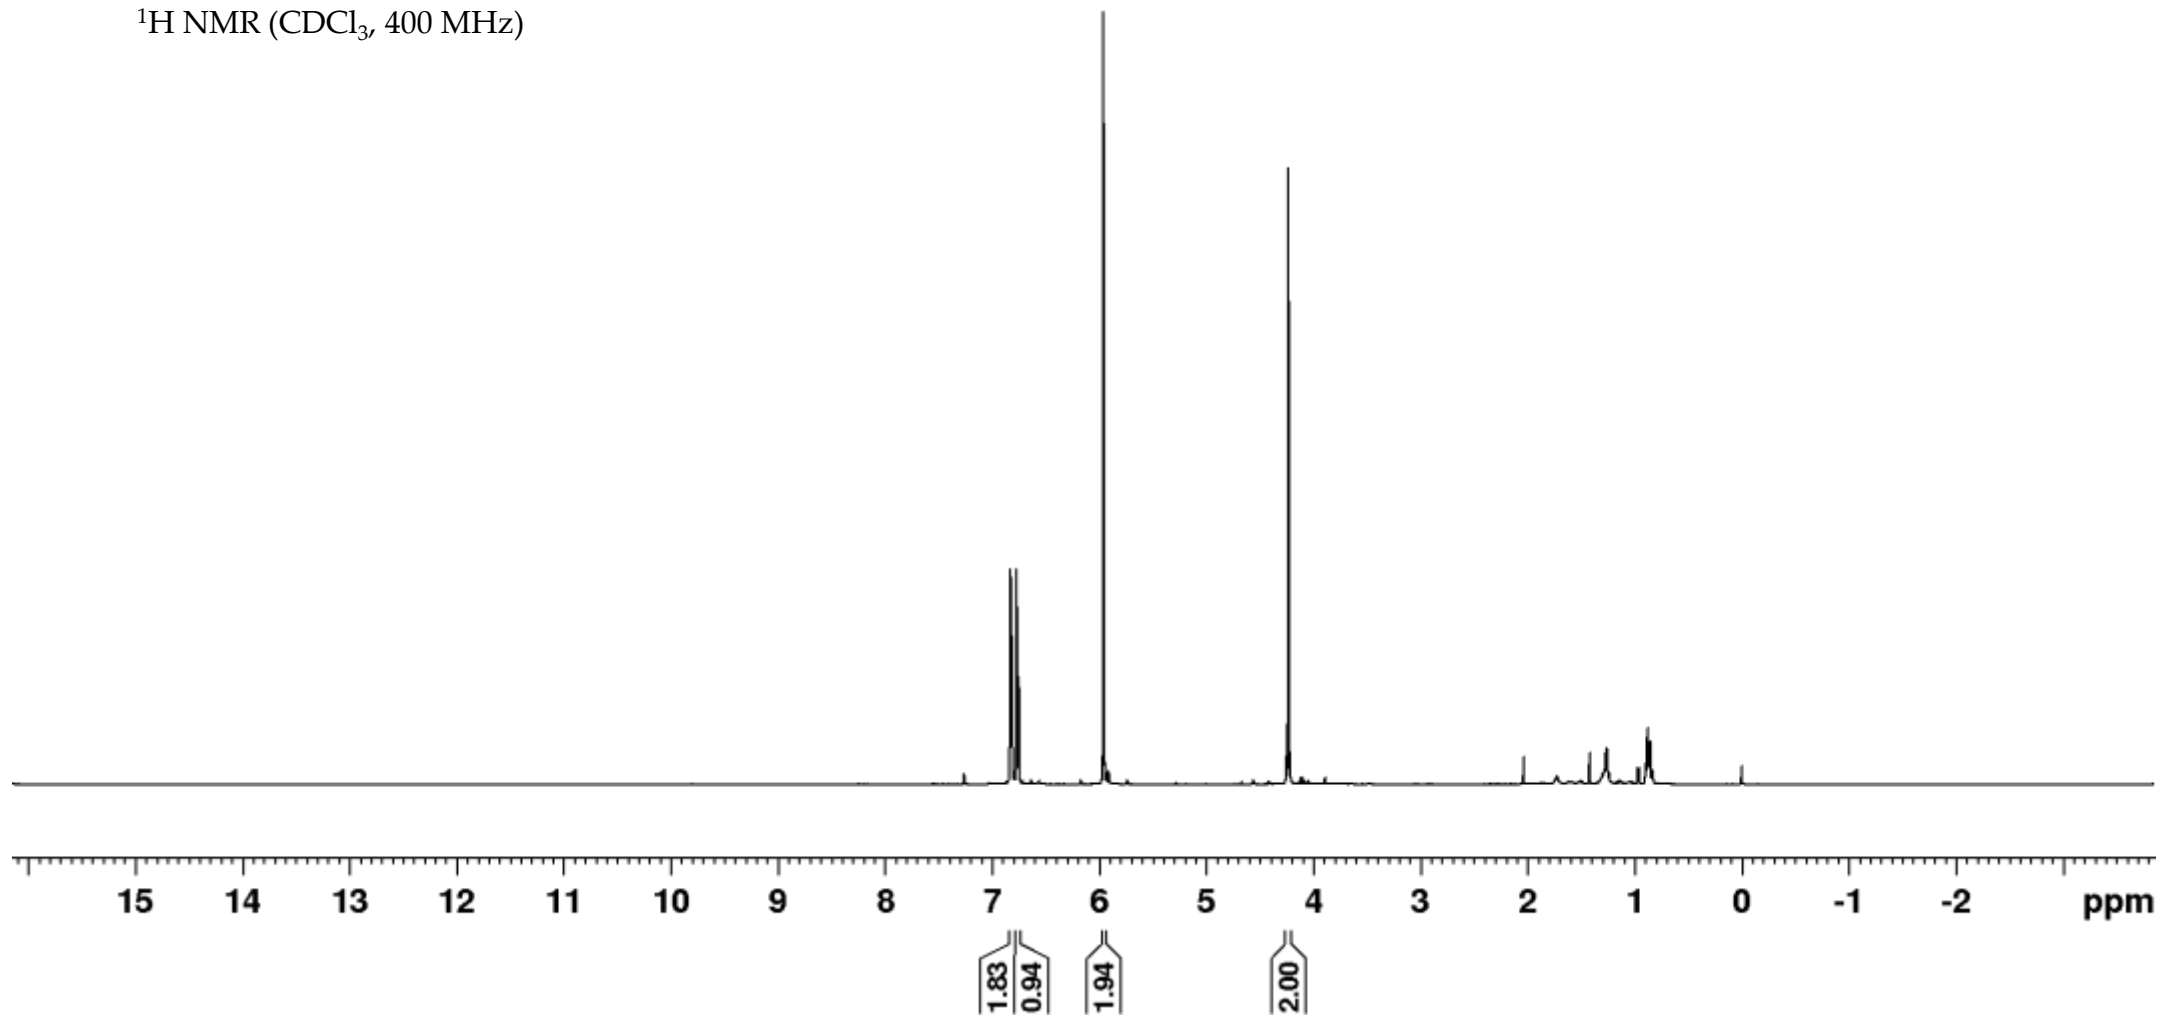

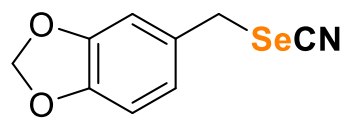

**10b**

$^{13}\text{C}$  NMR ( $\text{CDCl}_3$ , 100 MHz)

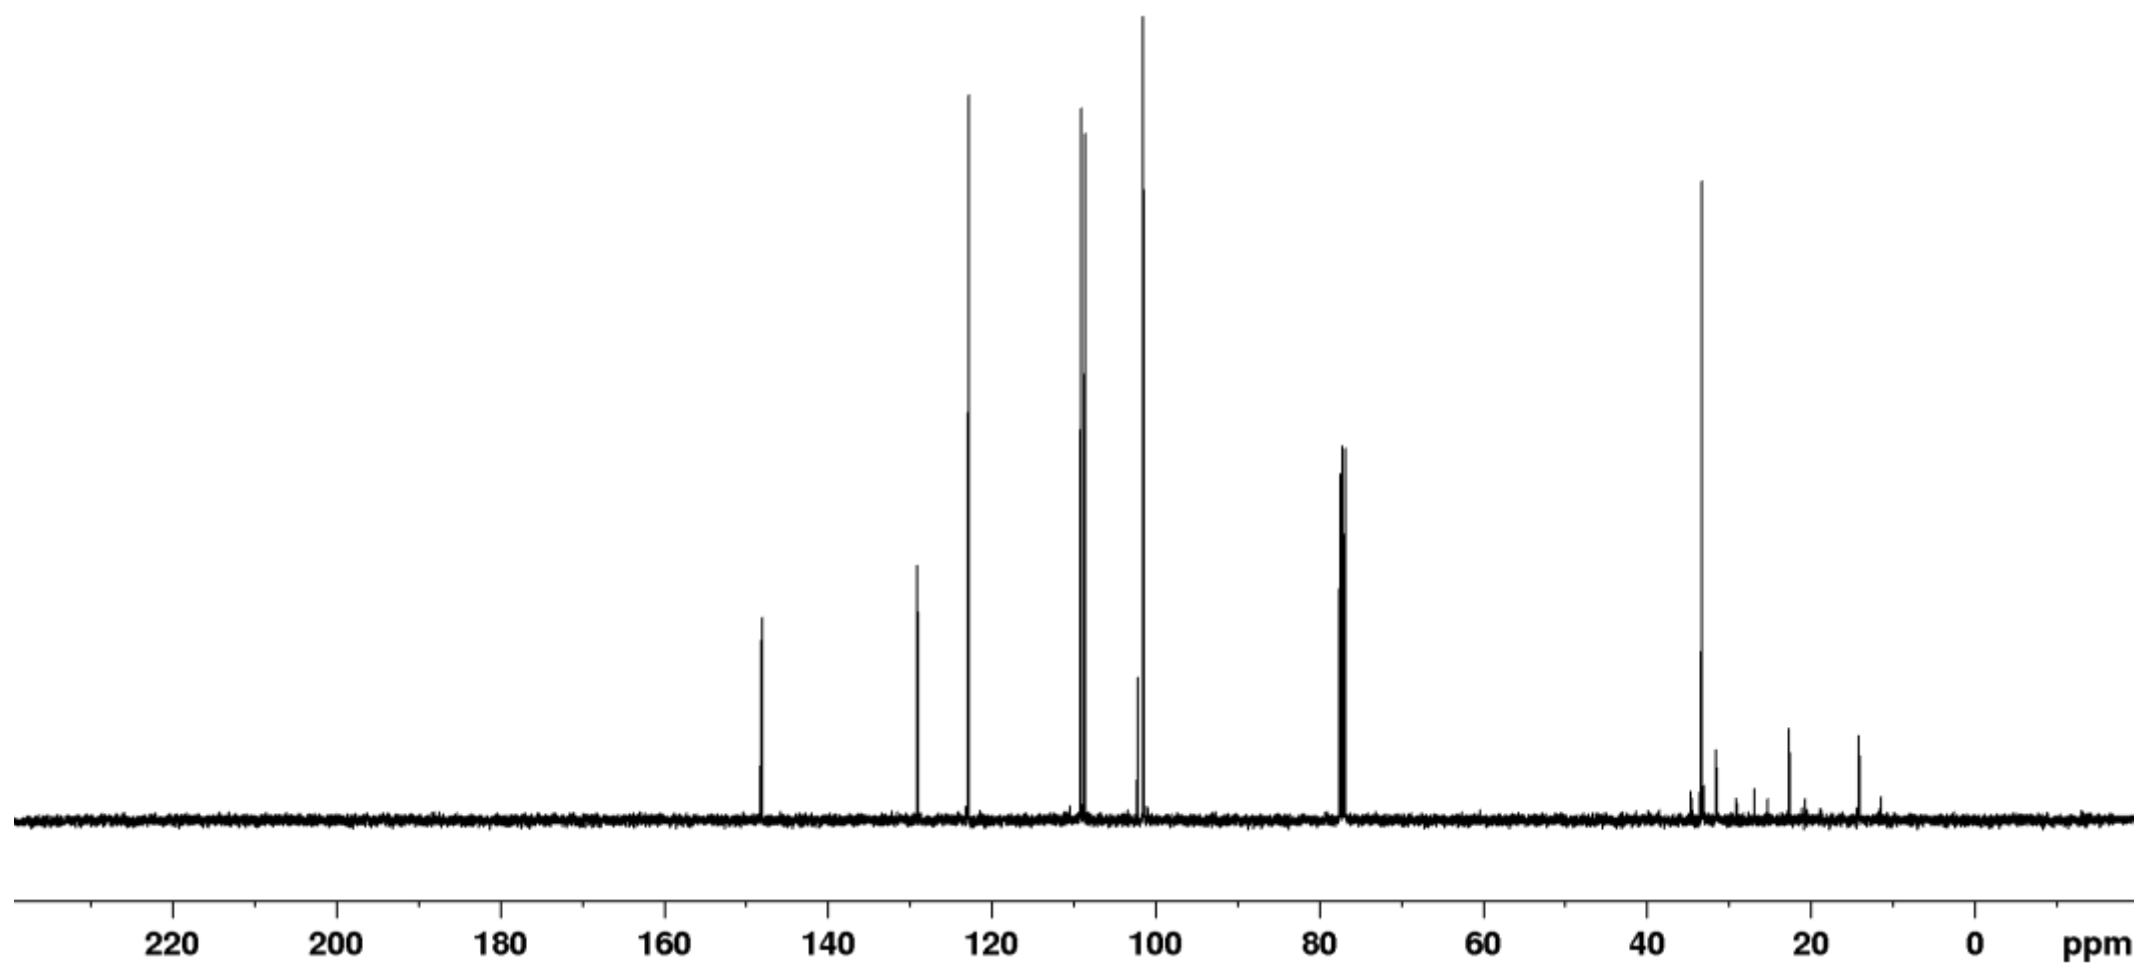

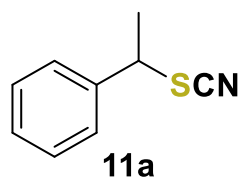

$^1\text{H}$  NMR ( $\text{CDCl}_3$ , 400 MHz)

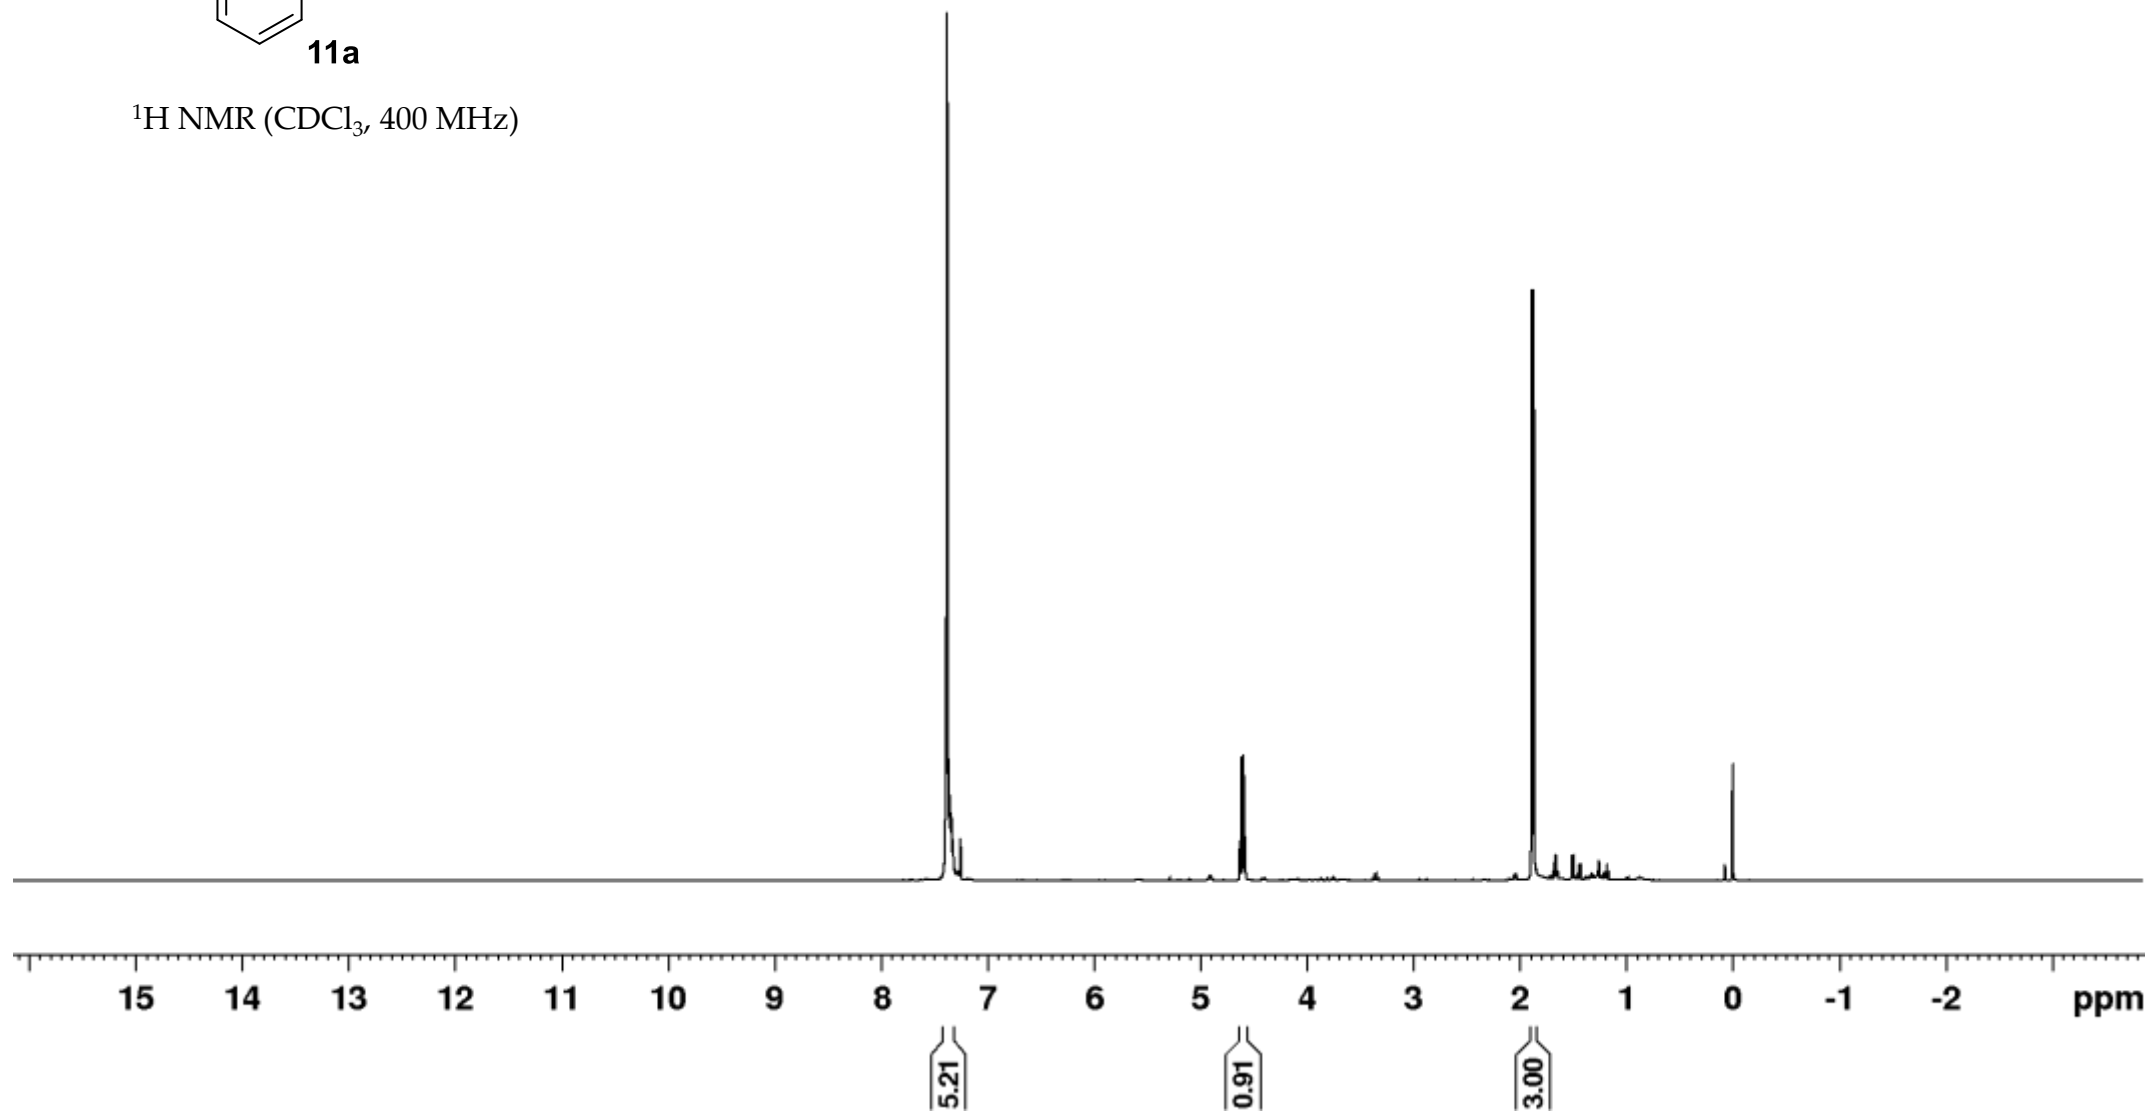

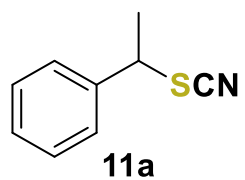

$^{13}\text{C}$  NMR ( $\text{CDCl}_3$ , 100 MHz)

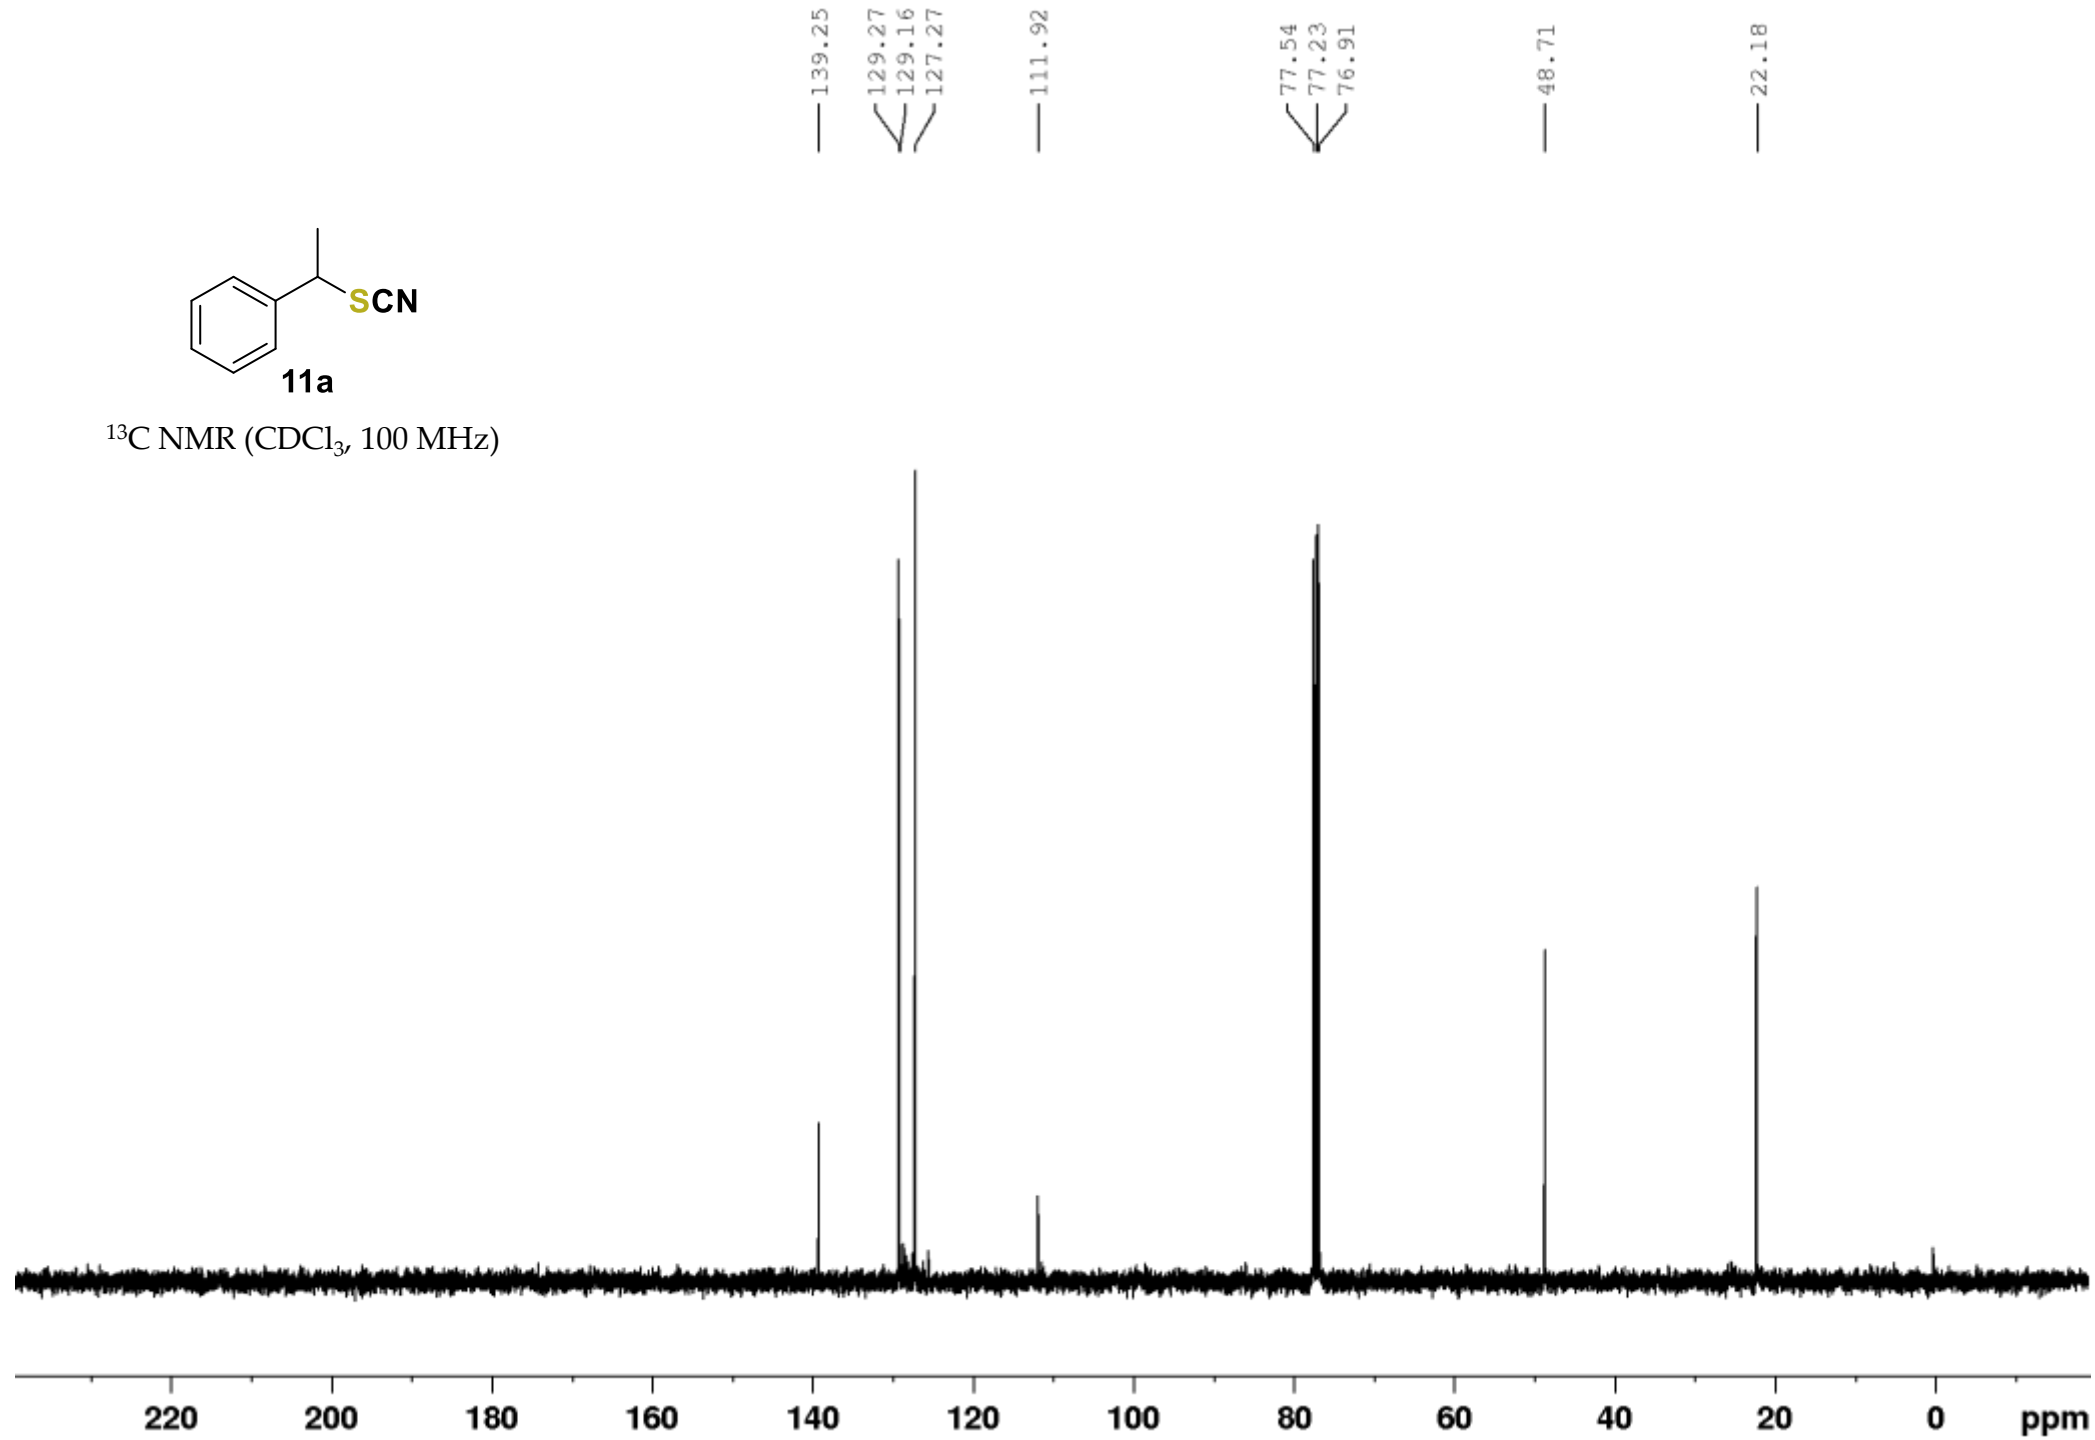

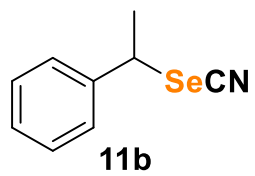

$^1\text{H}$  NMR ( $\text{CDCl}_3$ , 400 MHz)

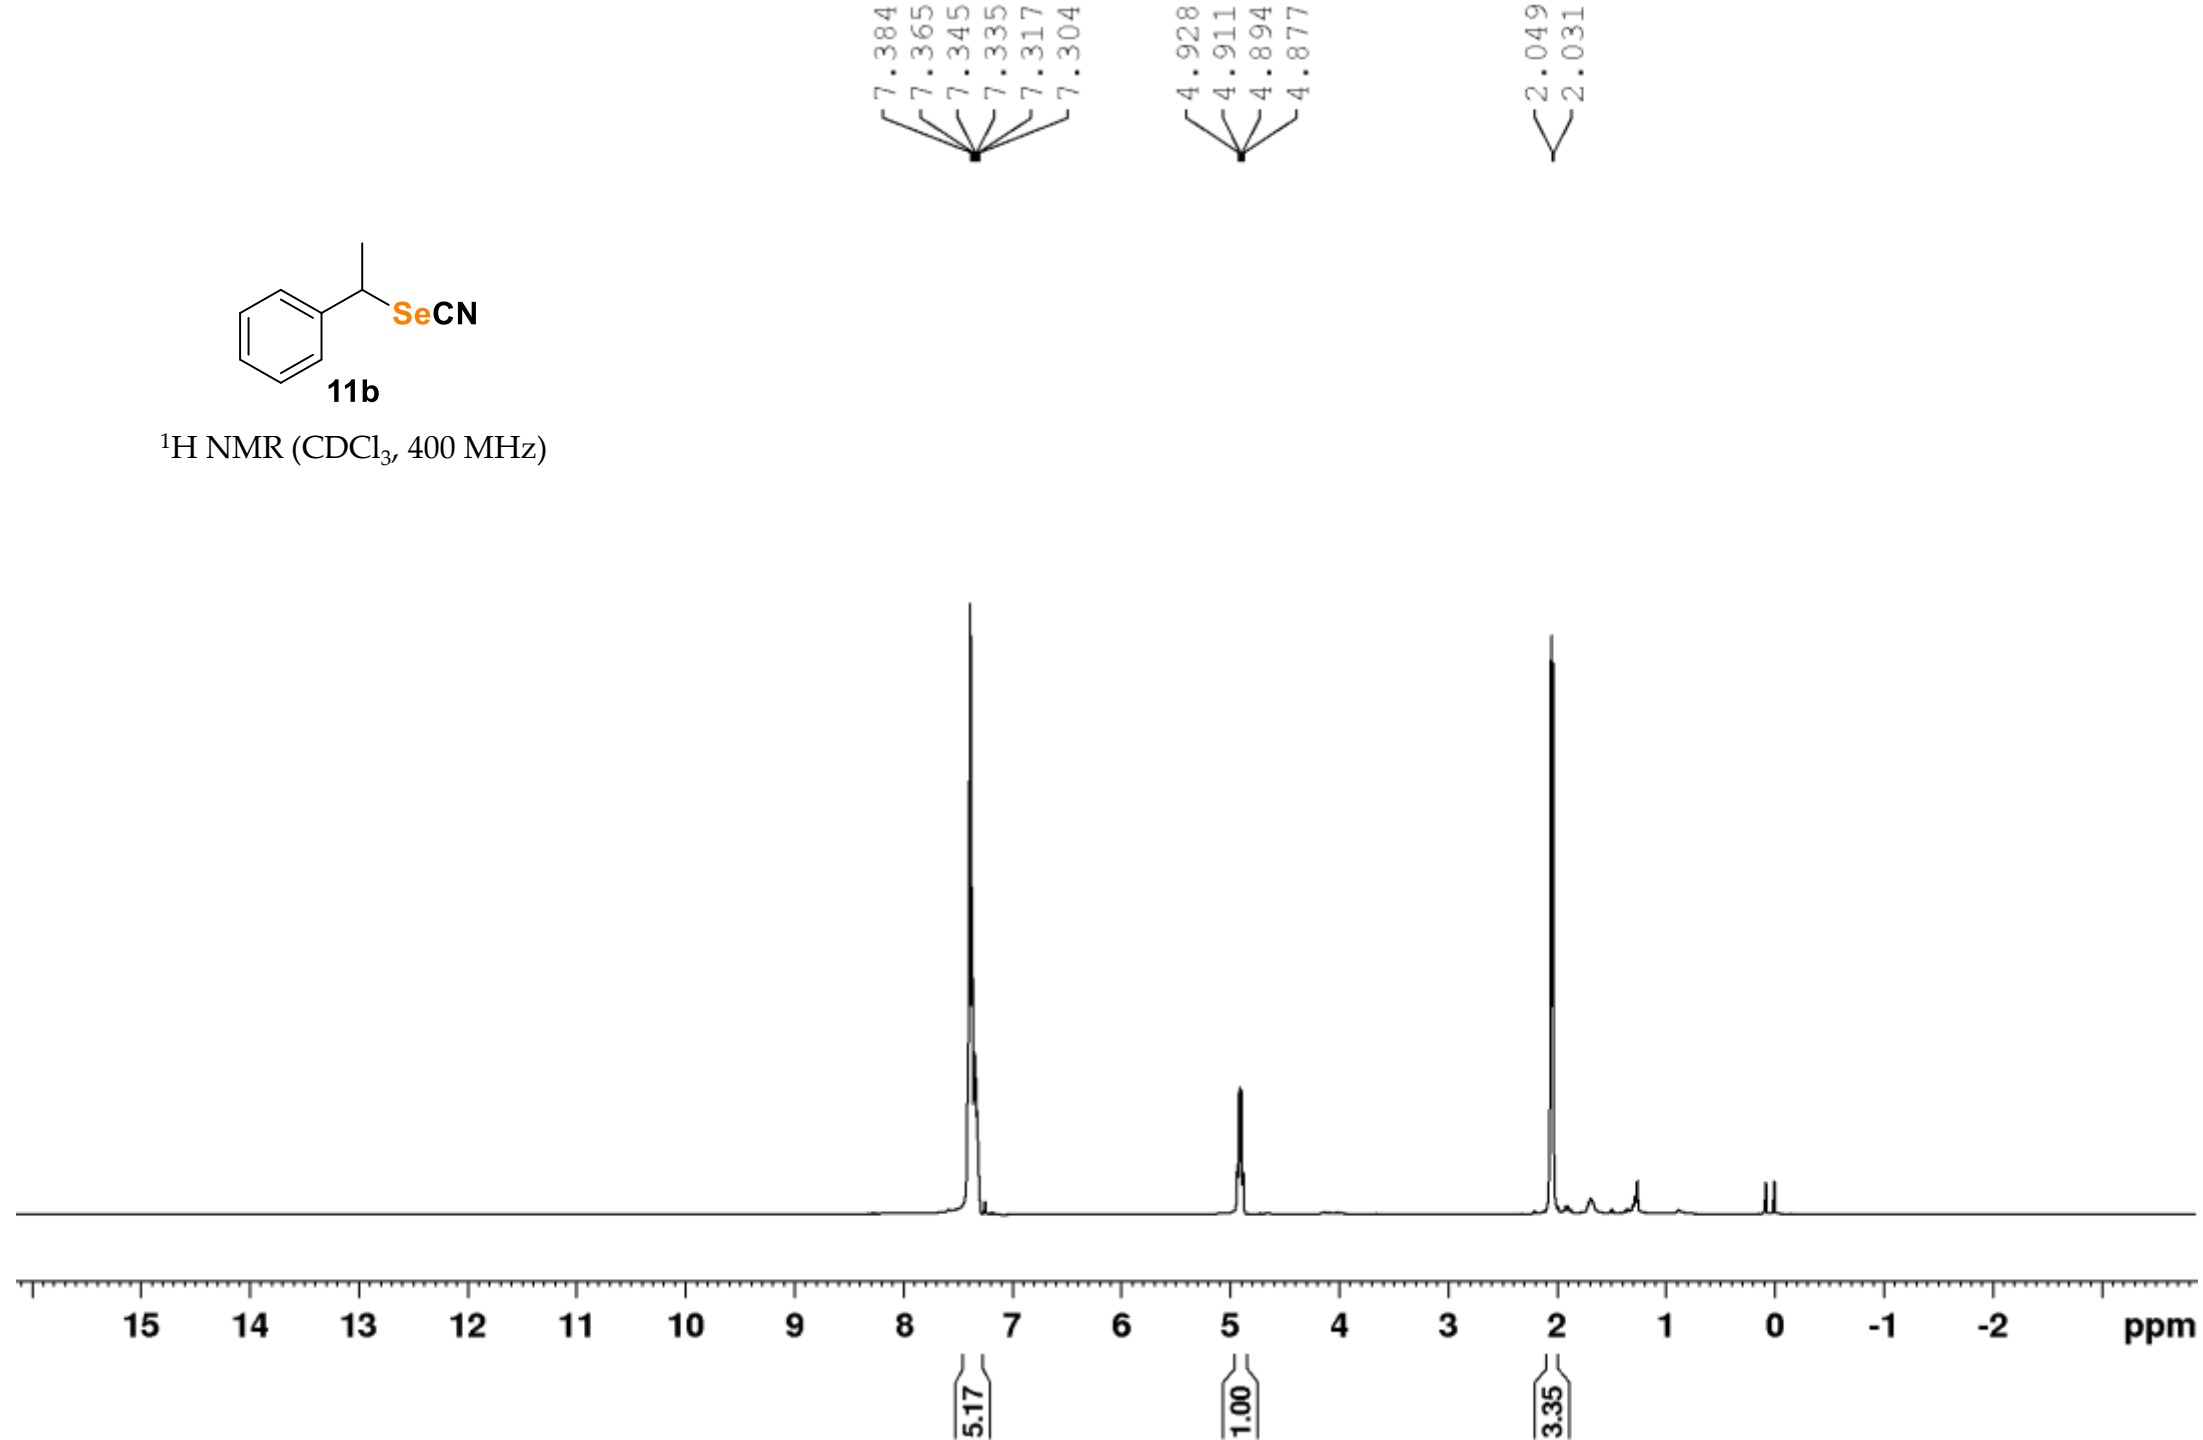

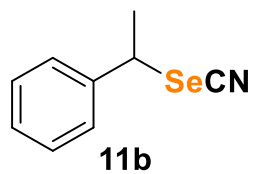

$^{13}\text{C}$  NMR ( $\text{CDCl}_3$ , 100 MHz)

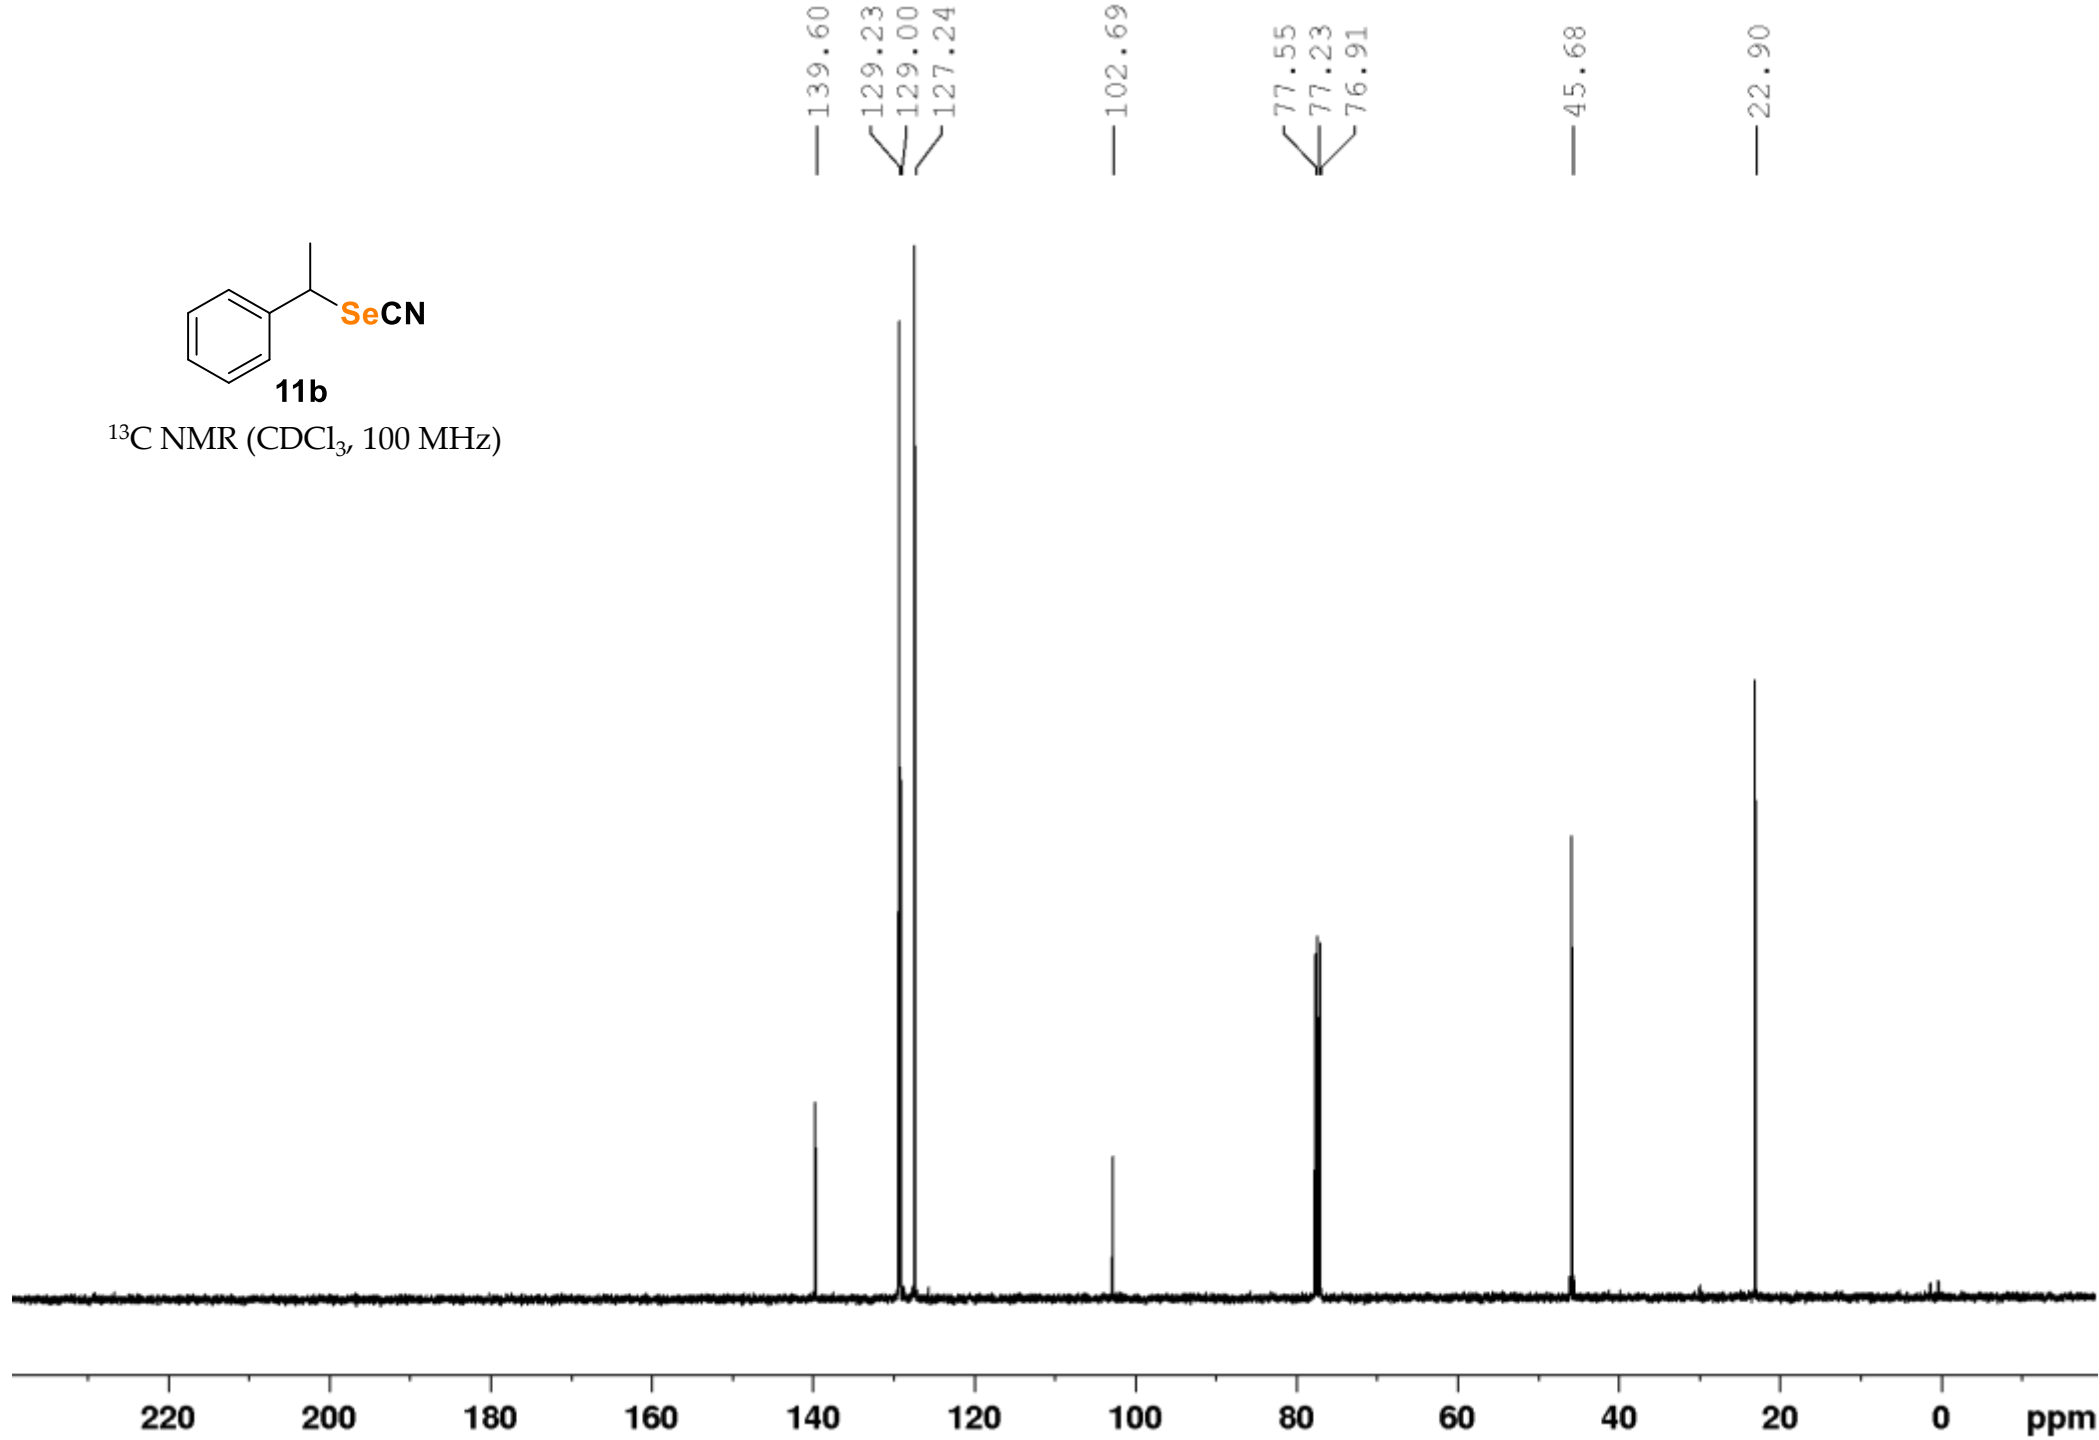

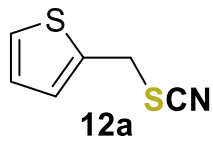

$^1\text{H}$  NMR ( $\text{CDCl}_3$ , 400 MHz)

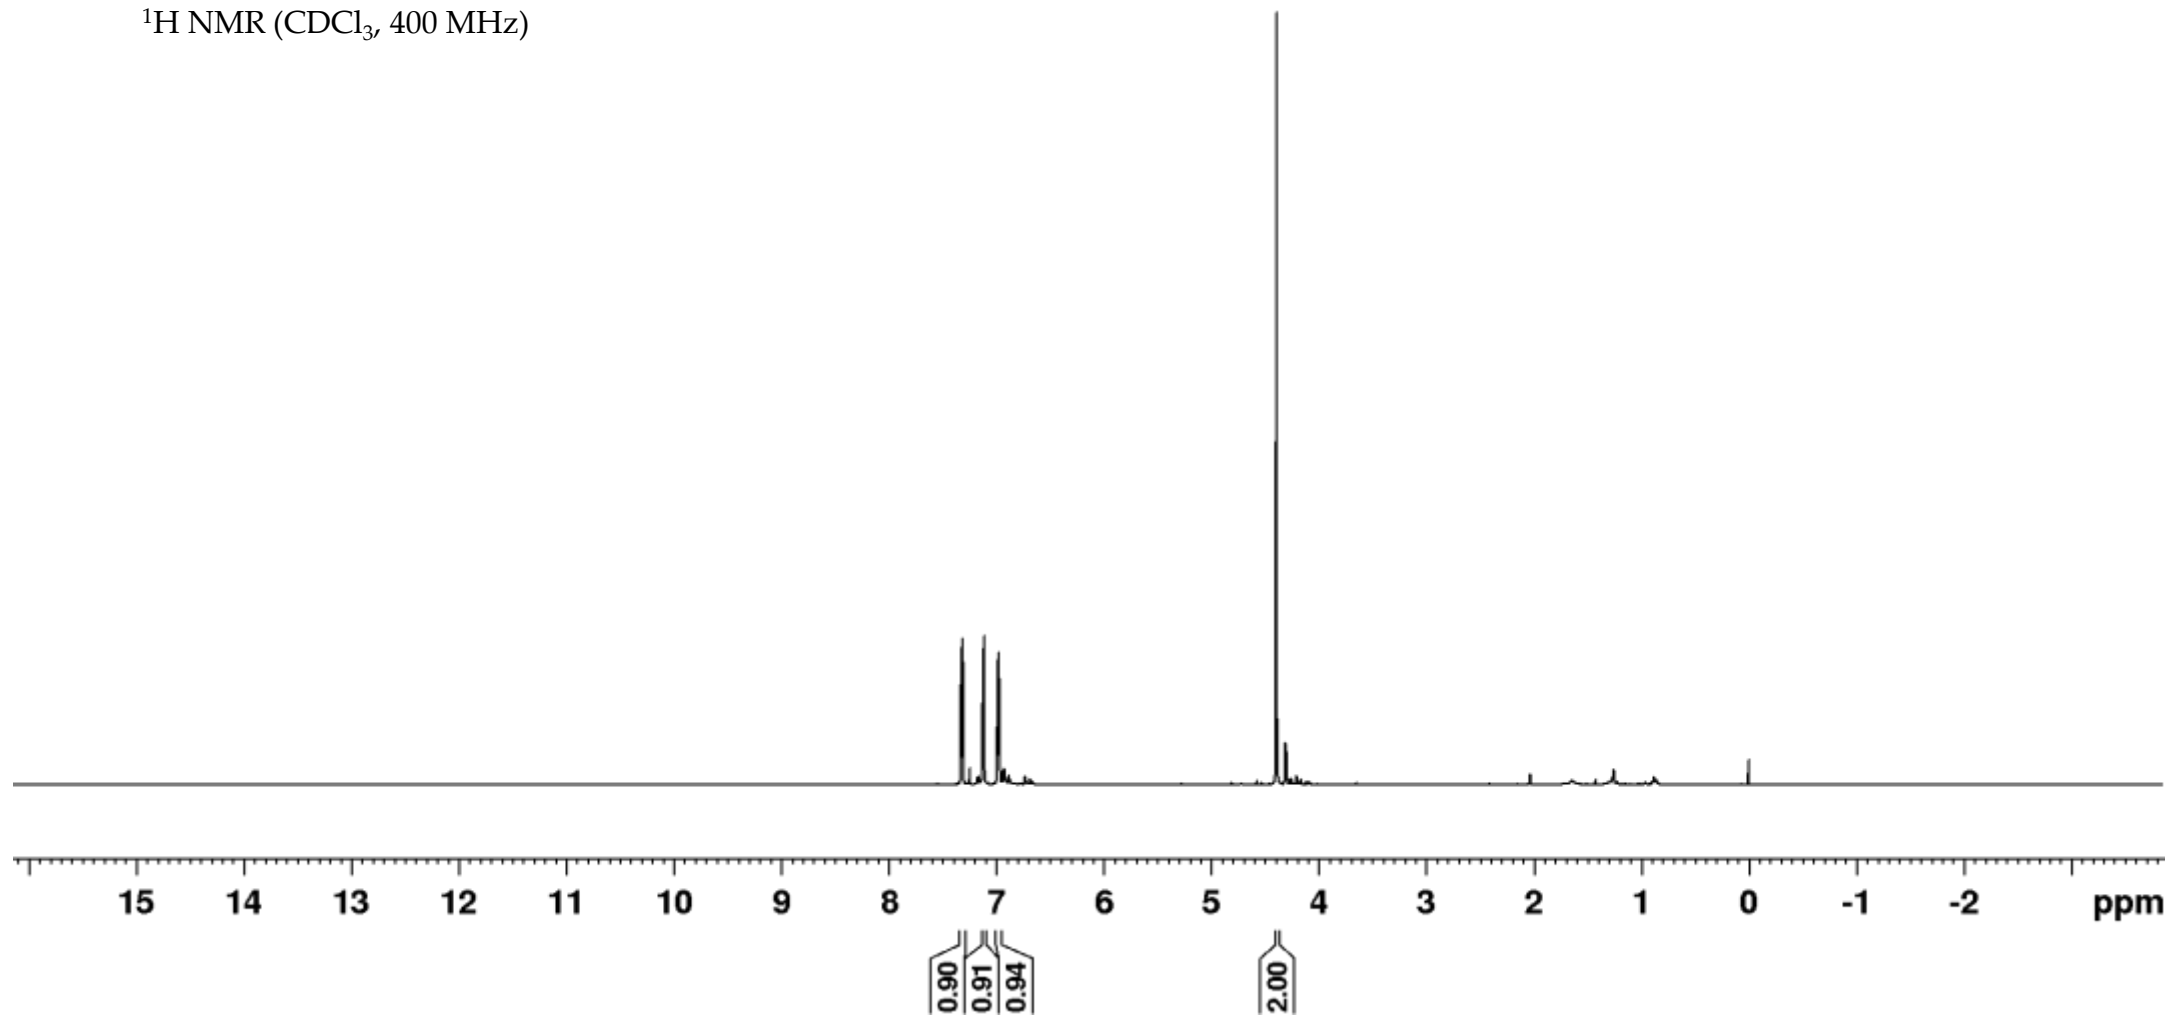



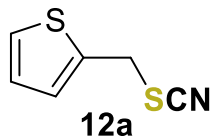

$^{13}\text{C}$  NMR ( $\text{CDCl}_3$ , 100 MHz)

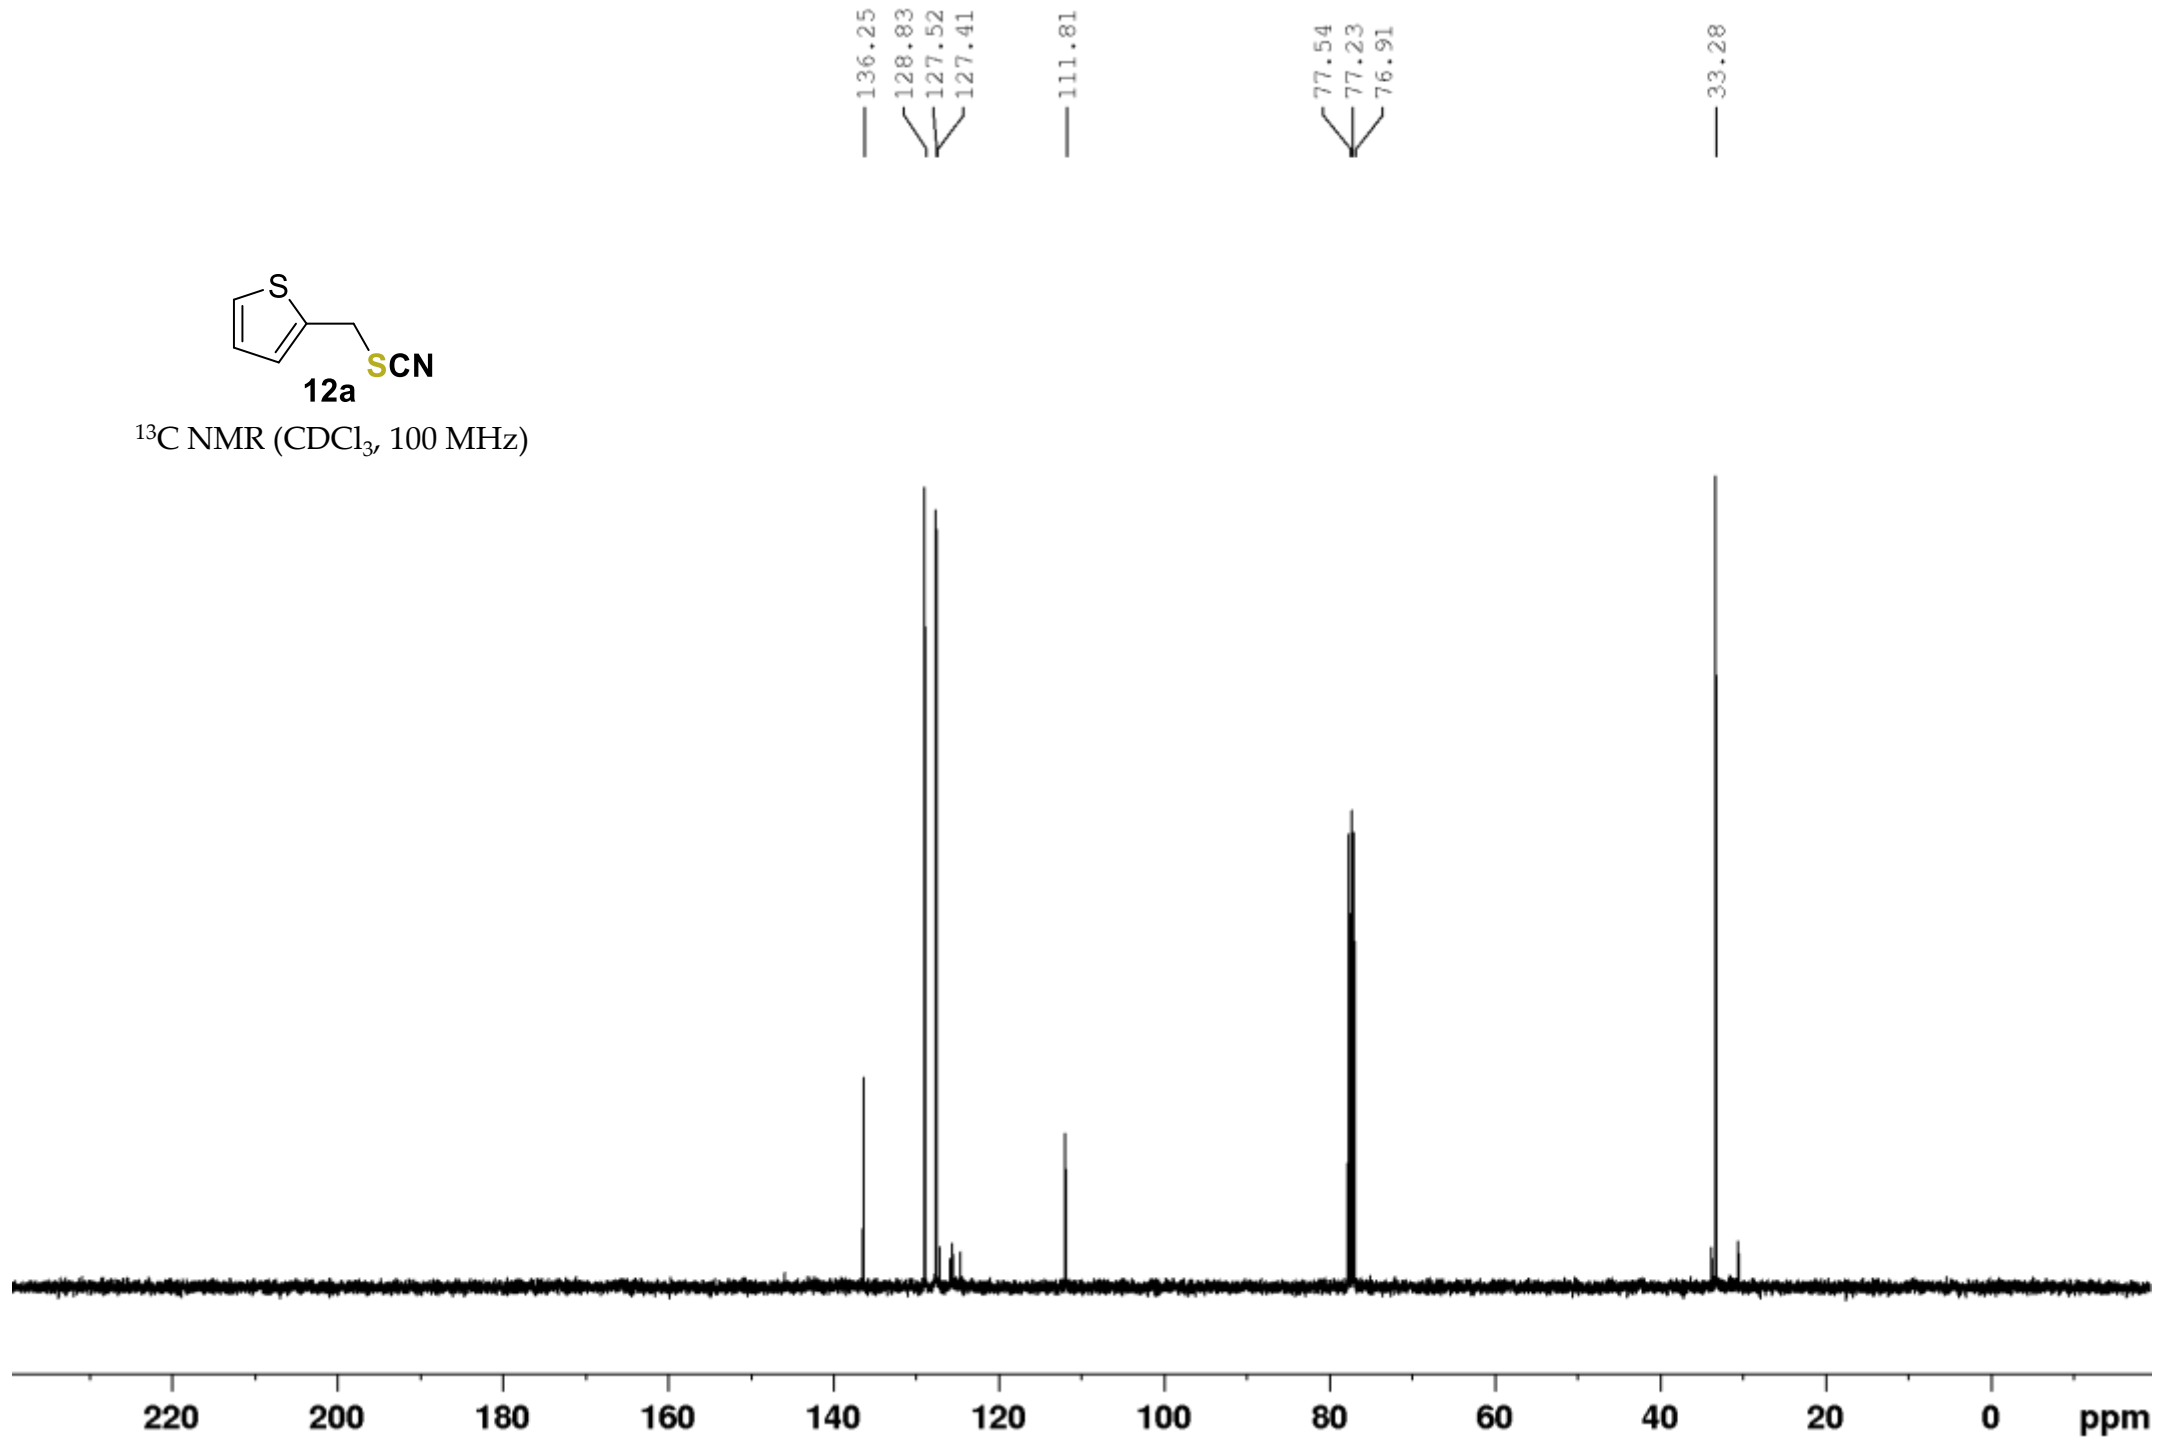

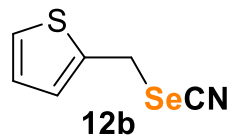

$^1\text{H}$  NMR ( $\text{CDCl}_3$ , 400 MHz)

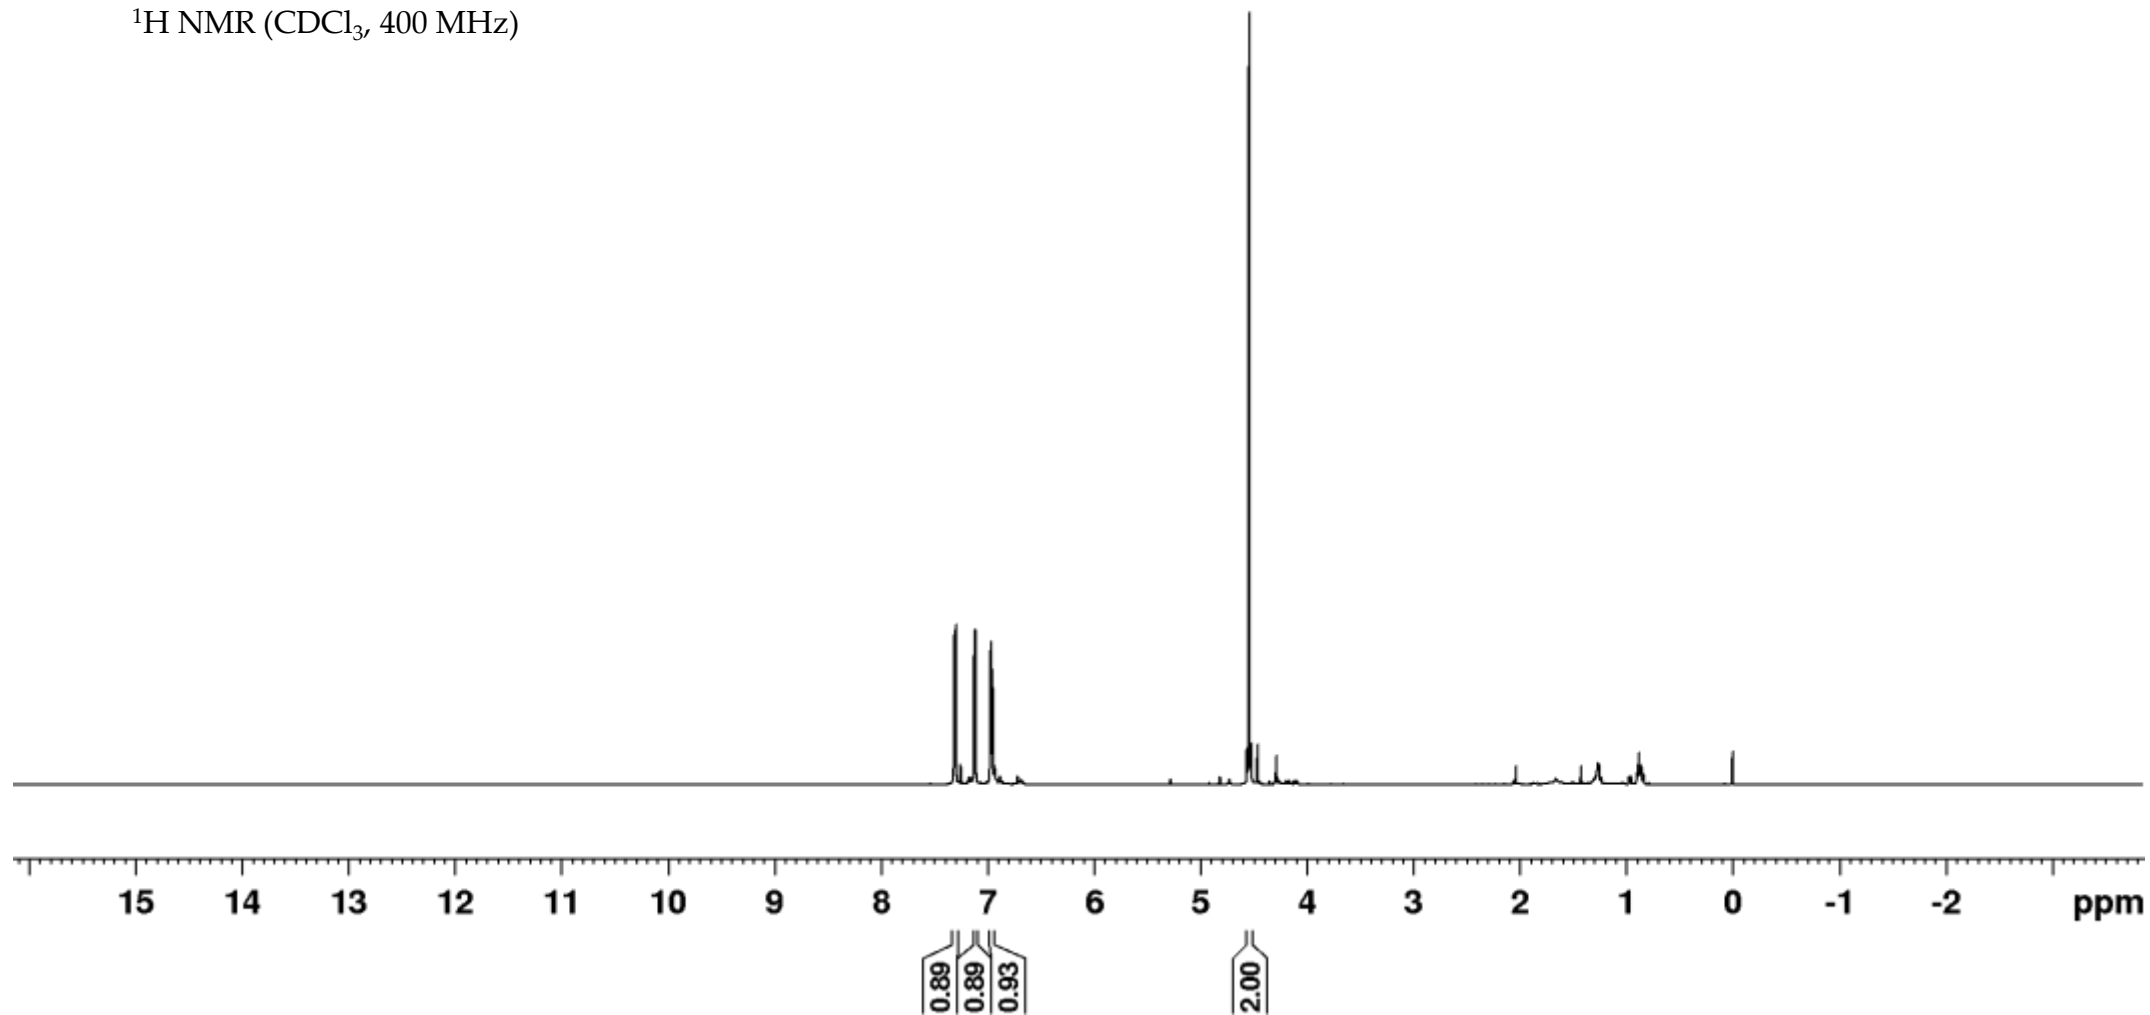

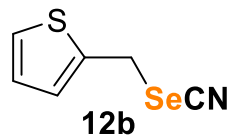

$^{13}\text{C}$  NMR ( $\text{CDCl}_3$ , 100 MHz)

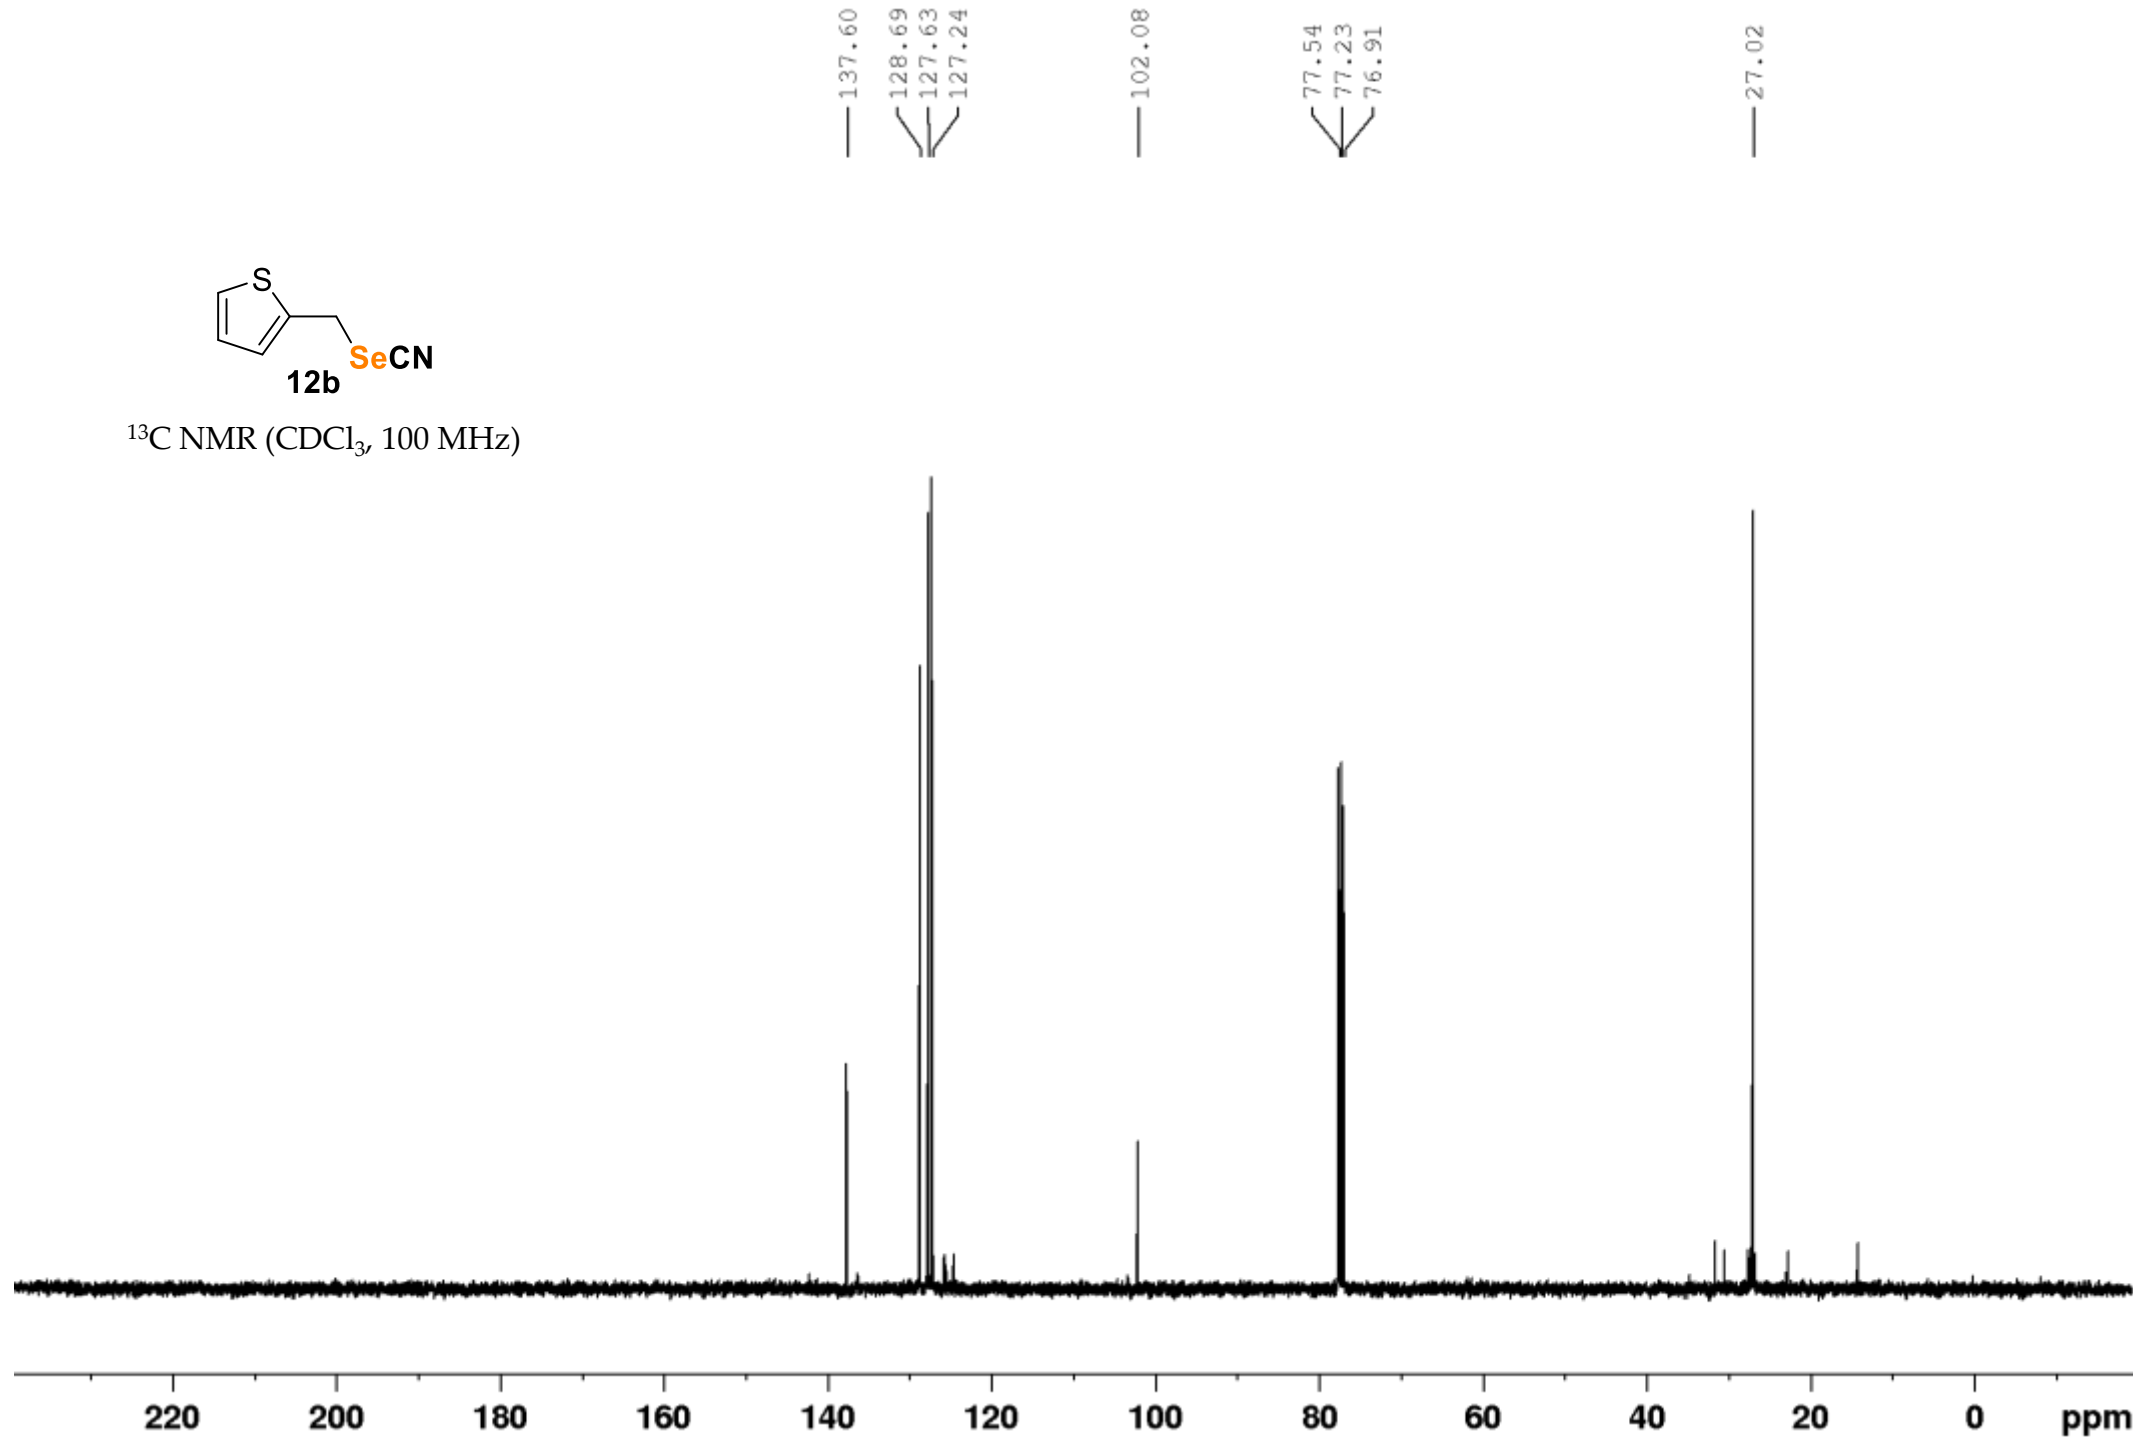

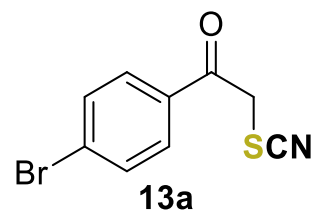

$^1\text{H}$  NMR ( $\text{CDCl}_3$ , 400 MHz)

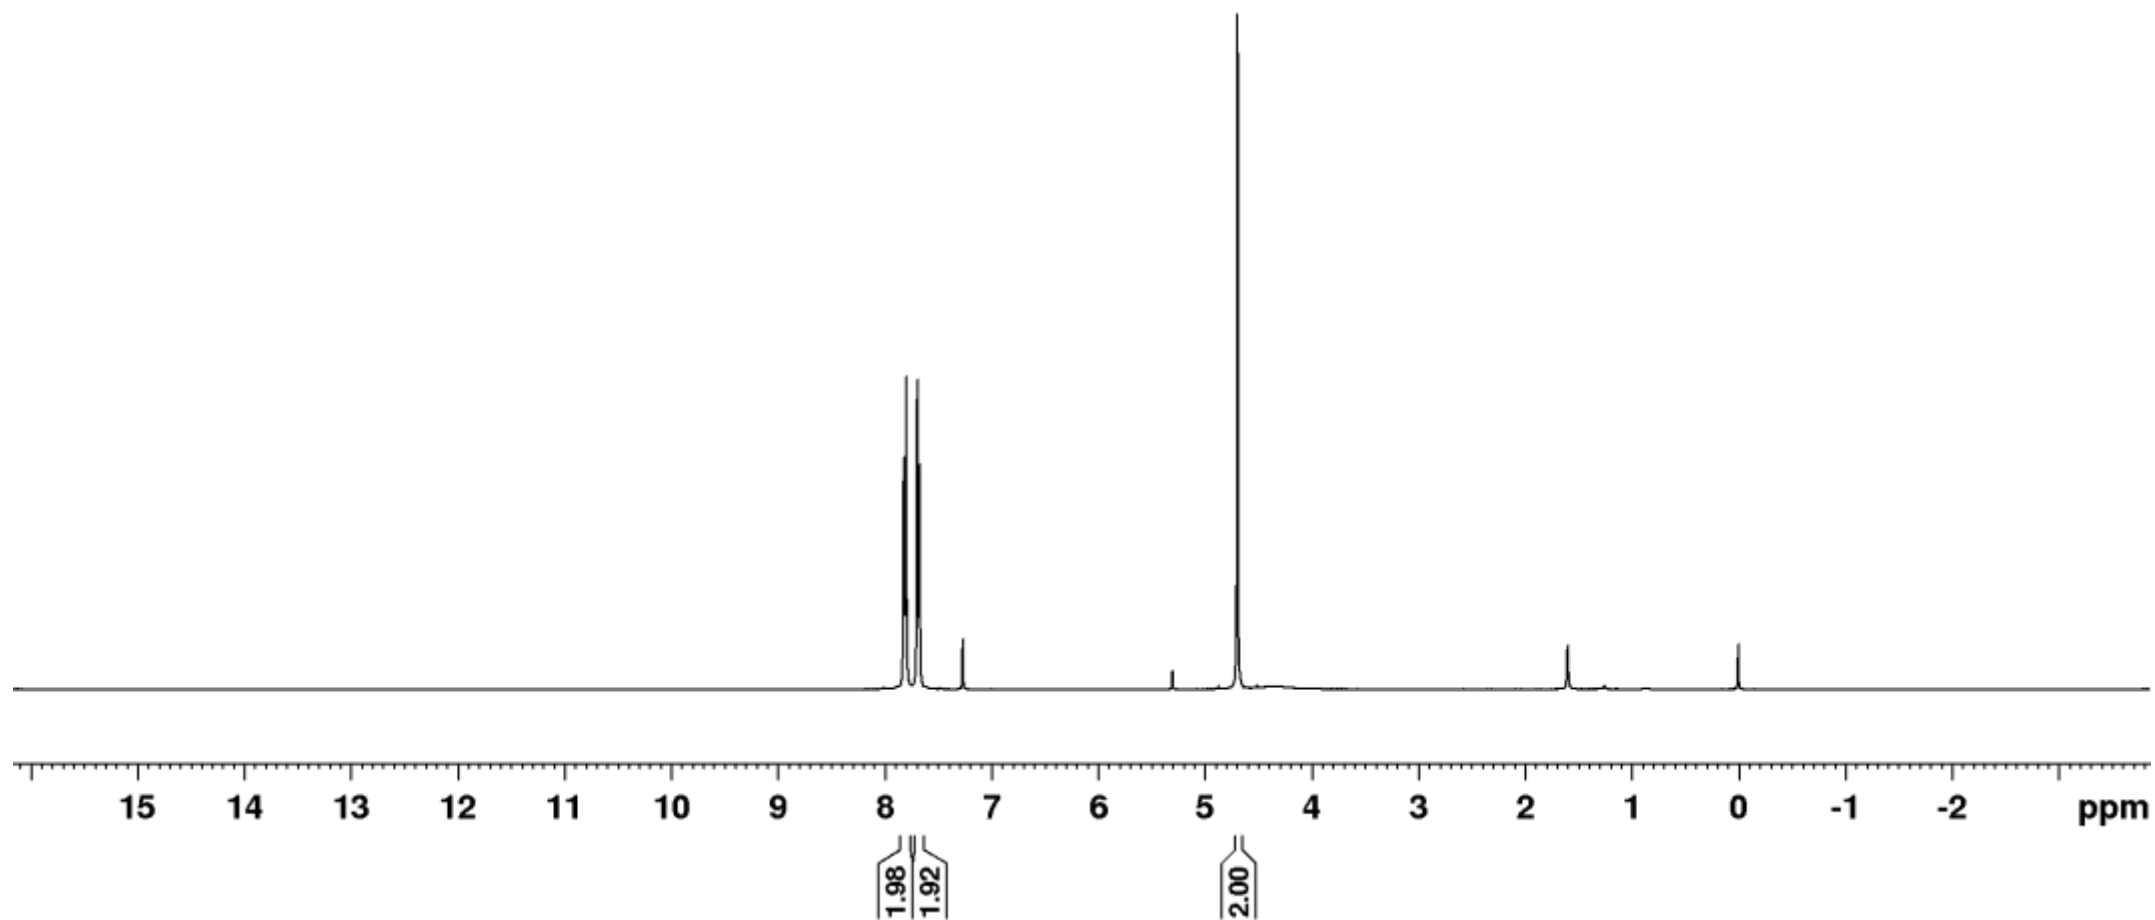

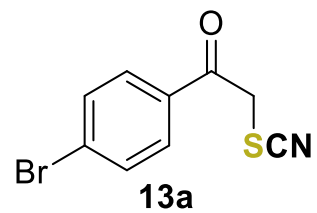

$^{13}\text{C}$  NMR ( $\text{CDCl}_3$ , 100 MHz)

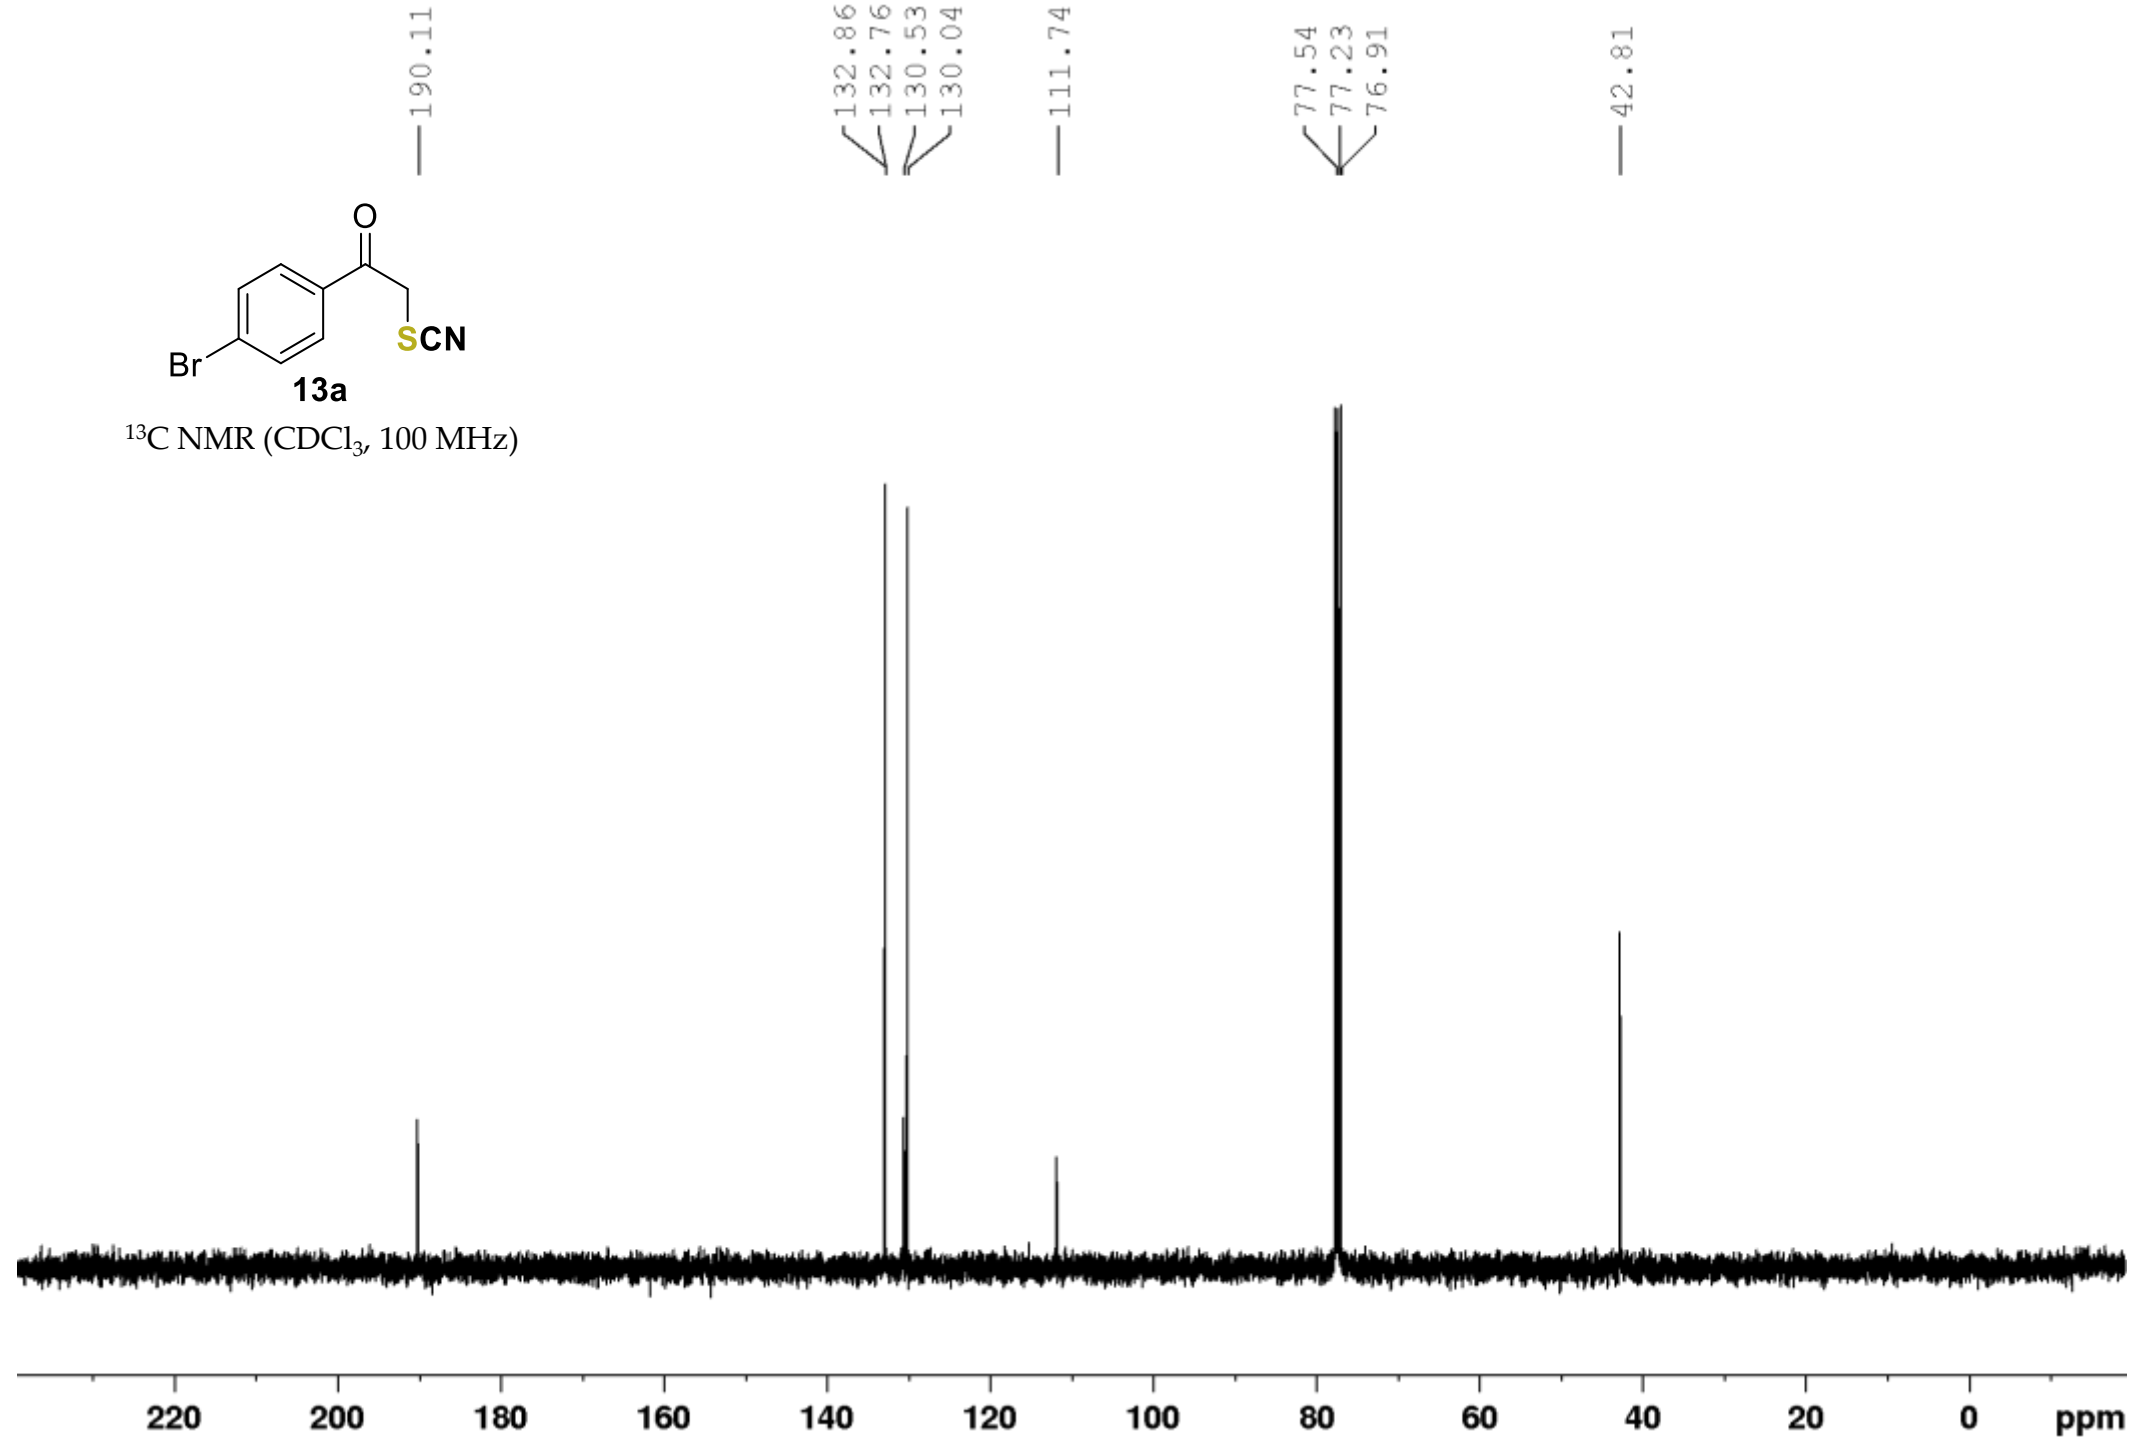

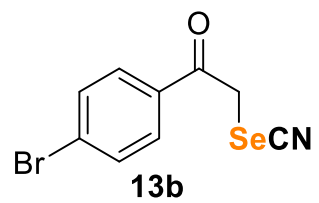

$^1\text{H}$  NMR ( $\text{CDCl}_3$ , 400 MHz)

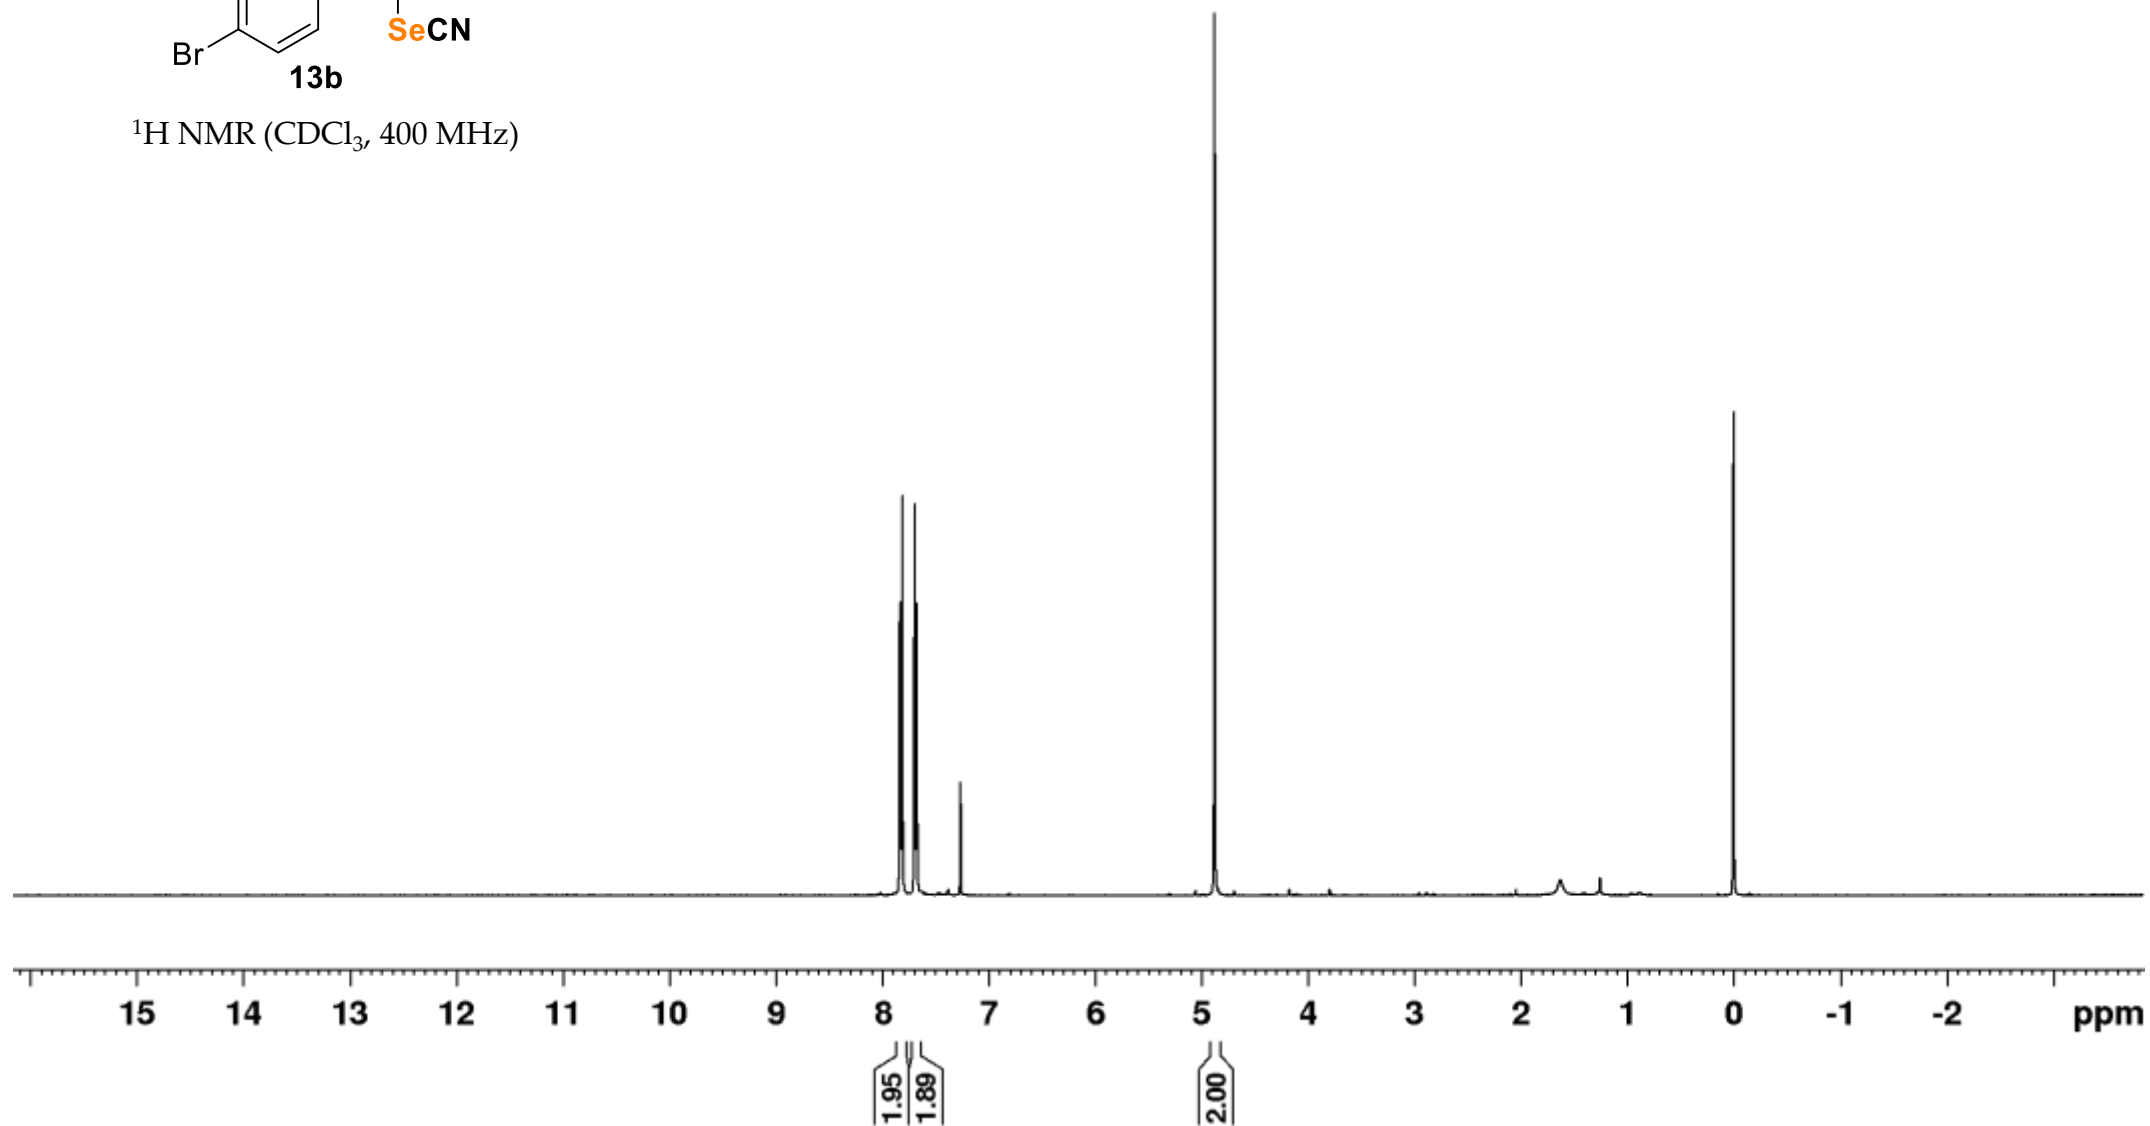

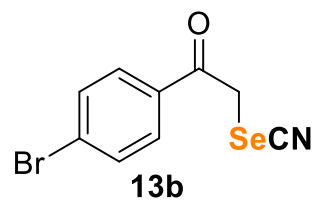

$^{13}\text{C}$  NMR ( $\text{CDCl}_3$ , 100 MHz)

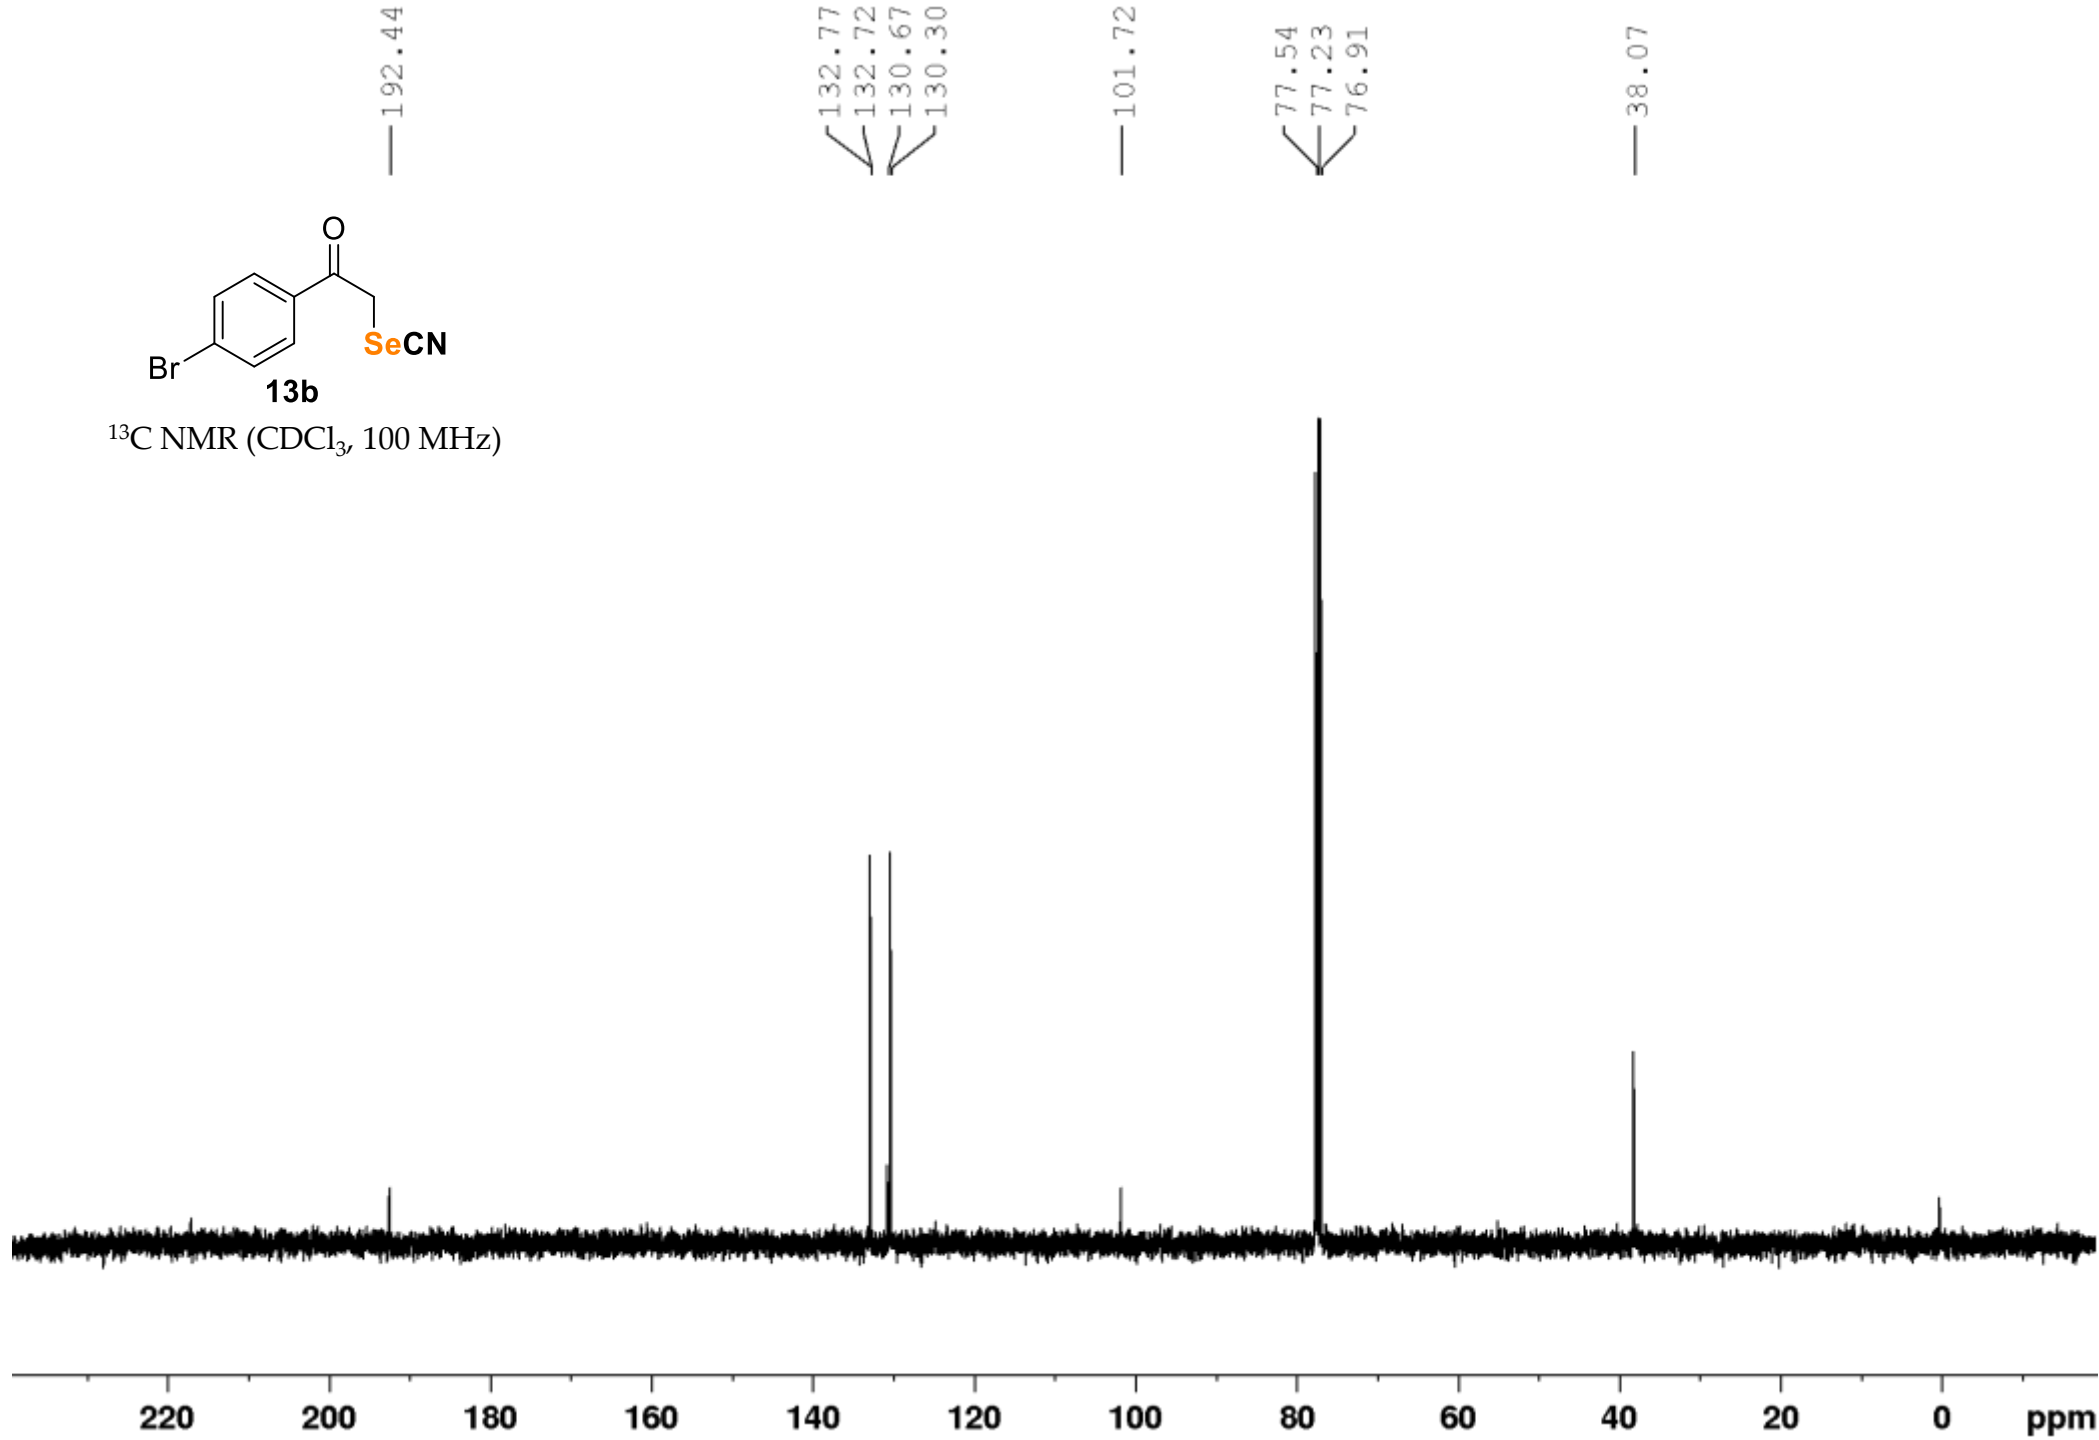

Supplement: s1 [file s1]
